# Supplementary material for: Dissecting Wnt/β-catenin signaling during gastrulation using RNA interference in mouse embryos
Source: Oxford University Press journal article supplement (doi:10.1242/dev.01842), 2005-04-28
Supplement: dev01842supptable1.pdf [file dev01842supptable1.pdf]

**Table S1. Filtered list of 262 upregulated and 77 downregulated genes across all three Affymetrix MGU74v2 GeneChips**

| AFFYID      | NAME                                                                                                                                                                                         | Mut-wt | Mut-het |
|-------------|----------------------------------------------------------------------------------------------------------------------------------------------------------------------------------------------|--------|---------|
| 93133_at    | Cluster Incl U70859:Mus musculus cationic amino acid transporter (CAT3) mRNA, complete cds /cds=(273,2129) /gb=U70859 /gi=1575775 /ug=Mm.5140 /len=2371                                      | 1.6    | 1.4     |
| 161626_f_at | Cluster Incl AV028204:AV028204 Mus musculus cDNA /clone=1300018L03 /clone_end=3 /gb=AV028204 /gi=4807814 /ug=Mm.69193 /len=266 /NOTE=replacement for probe set(s) 96991_f_at on MG-U74A      | 1.1    | 1.4     |
| 102764_at   | Cluster Incl M36387:Tumor rejection antigen P1A /cds=(271,945) /gb=M36387 /gi=202143 /ug=Mm.1297 /len=1174                                                                                   | 0.8    | 1.4     |
| 102220_at   | Cluster Incl AB017360:Mus musculus UTF1 gene, complete cds /cds=(0,1019) /gb=AB017360 /gi=5672601 /ug=Mm.10205 /len=1020                                                                     | 1.7    | 1.3     |
| 100009_r_at | Cluster Incl X94127:SRY-box containing gene 2 /cds=(0,959) /gb=X94127 /gi=1209429 /ug=Mm.4541 /len=960                                                                                       | 1.3    | 1.3     |
| 103776_at   | Cluster Incl AA597222:vo28b03.r1 Mus musculus cDNA, 5 end /clone=IMAGE-1051181 /clone_end=5 /gb=AA597222 /gi=2412657 /ug=Mm.24822 /len=277                                                   | 1      | 1.3     |
| 100078_at   | Cluster Incl M64248:Mouse apolipoprotein A-IV (apoA-IV) mRNA, complete cds /cds=(92,1267) /gb=M64248 /gi=191884 /ug=Mm.4533 /len=1427                                                        | 1      | 1.3     |
| 161361_s_at | Cluster Incl AV213431:AV213431 Mus musculus cDNA, 3 end /clone=2410127L14 /clone_end=3 /gb=AV213431 /gi=6154654 /ug=Mm.59362 /len=356 /NOTE=replacement for probe set(s) 94653_at on MG-U74A | 0.6    | 1.3     |
| 93573_at    | Cluster Incl V00835:Metallothionein 1 /cds=(0,185) /gb=V00835 /gi=53247 /ug=Mm.2041 /len=186                                                                                                 | 1.1    | 1.2     |
| 95000_g_at  | Cluster Incl AJ010338:Mus Musculus mRNA for hypothetical protein /cds=(8,1273) /gb=AJ010338 /gi=3724121 /ug=Mm.2735 /len=1739                                                                | 0.7    | 1.2     |
| 96047_at    | Cluster Incl U63146:Mus musculus retinol binding protein (RBP) mRNA, complete cds /cds=(0,605) /gb=U63146 /gi=1515449 /ug=Mm.2605 /len=606                                                   | 1      | 1.1     |
| 95518_at    | Cluster Incl AW122893:UI-M-BH2.1-apa-d-07-0-UI.s1 Mus musculus cDNA, 3 end /clone=UI-M-BH2.1-apa-d-07-0-UI /clone_end=3 /gb=AW122893 /gi=6098423 /ug=Mm.25311 /len=217                       | 0.8    | 1.1     |
| 92550_at    | Cluster Incl M36120:Keratin complex 1, acidic, gene 19 /cds=(0,1211) /gb=M36120 /gi=198583 /ug=Mm.1012 /len=1212                                                                             | 0.8    | 1.1     |
| 161906_f_at | Cluster Incl AV113045:AV113045 Mus musculus cDNA /clone=2610018I11 /clone_end=3 /gb=AV113045 /gi=5267125 /ug=Mm.75972 /len=247 /NOTE=replacement for probe set(s) 98695_f_at on MG-U74A      | 2      | 1       |
| 93568_i_at  | Cluster Incl AI853444:UI-M-BH0-ajy-d-09-0-UI.s1 Mus musculus cDNA, 3 end /clone=UI-M-BH0-ajy-d-09-0-UI /clone_end=3 /gb=AI853444 /gi=5497350 /ug=Mm.204 /len=363                             | 0.9    | 1       |
| 96094_at    | Cluster Incl U79573:Mus musculus apolipoprotein A-I gene, complete cds /cds=(0,791) /gb=U79573 /gi=2145136 /ug=Mm.26743 /len=792                                                             | 0.9    | 0.9     |
| 93840_at    | Cluster Incl AA655303:vg85e06.s1 Mus musculus cDNA, 5 end /clone=IMAGE-1109122 /clone_end=5 /gb=AA655303 /gi=2591457 /ug=Mm.2161 /len=292                                                    | 0.9    | 0.9     |
| 92633_at    | Cluster Incl AJ242663:Mus musculus mRNA for cathepsin Z precursor (ctsz gene) /cds=(104,1024) /gb=AJ242663 /gi=5019547 /ug=Mm.115 /len=1291                                                  | 0.9    | 0.9     |
| 93626_at    | Cluster Incl AF103875:Mus musculus placenta-specific ATP-binding cassette transporter (Abcp) mRNA, partial cds /cds=(0,443) /gb=AF103875 /gi=4185797 /ug=Mm.7458 /len=502                    | 0.7    | 0.9     |
| 93261_at    | Cluster Incl AJ000990:Mus musculus mRNA for legumain /cds=(94,1401) /gb=AJ000990 /gi=3676226 /ug=Mm.17185 /len=1889                                                                          | 0.6    | 0.9     |
| 97160_at    | Cluster Incl X04017:Mouse mRNA for cysteine-rich glycoprotein SPARC /cds=(89,997) /gb=X04017 /gi=54168 /ug=Mm.35439 /len=2079                                                                | 0.5    | 0.9     |
| 99475_at    | Cluster Incl U88327:Mus musculus suppressor of cytokine signalling-2 (SOCS-2) mRNA, complete cds /cds=(222,818) /gb=U88327 /gi=2245385 /ug=Mm.4132 /len=1121                                 | 1.1    | 0.8     |
| 104585_at   | Cluster Incl AI316546:uj98c03.y1 Mus musculus cDNA, 5 end /clone=IMAGE-1957924 /clone_end=5 /gb=AI316546 /gi=4031813 /ug=Mm.23982 /len=490                                                   | 1      | 0.8     |
| 101561_at   | Cluster Incl K02236:Metallothionein 2 /cds=(0,185) /gb=K02236 /gi=199131 /ug=Mm.89170 /len=186                                                                                               | 1      | 0.8     |
| 96134_at    | Cluster Incl AA755260:vp92b12.r1 Mus musculus cDNA, 5 end /clone=IMAGE-1092191 /clone_end=5 /gb=AA755260 /gi=2802458 /ug=Mm.28147 /len=205                                                   | 1      | 0.8     |
| 98042_at    | Cluster Incl AW049787:UI-M-BH1-anm-e-03-0-UI.s1 Mus musculus cDNA, 3 end /clone=UI-M-BH1-anm-e-03-0-UI /clone_end=3 /gb=AW049787 /gi=5910316 /ug=Mm.34126 /len=434                           | 0.9    | 0.8     |
| 160249_at   | Cluster Incl U44426:Tumor protein D52 /cds=(21,578) /gb=U44426 /gi=1469925 /ug=Mm.2777 /len=2033 /NOTE=replacement for probe set(s) 97225_at on MG-U74A                                      | 0.8    | 0.8     |
| 97887_at    | Cluster Incl Z22216:Apolipoprotein CII /cds=(0,293) /gb=Z22216 /gi=296375 /ug=Mm.28394 /len=294                                                                                              | 0.8    | 0.8     |
| 100479_at   | Cluster Incl AA756653:vv58e04.r1 Mus musculus cDNA, 5 end /clone=IMAGE-1226622 /clone_end=5 /gb=AA756653 /gi=2803851 /ug=Mm.5001 /len=393                                                    | 0.7    | 0.8     |
| 94834_at    | Cluster Incl U06119:Cathepsin H /cds=(47,1048) /gb=U06119 /gi=454100 /ug=Mm.2277 /len=1381                                                                                                   | 0.7    | 0.8     |
| 95465_s_at  | Cluster Incl AI849587:UI-M-AH1-agr-e-02-0-UI.s1 Mus musculus cDNA, 3 end /clone=UI-M-AH1-agr-e-02-0-UI /clone_end=3 /gb=AI849587 /gi=5493493 /ug=Mm.24750 /len=310                           | 0.7    | 0.8     |
| 102418_at   | Cluster Incl AA793009:vp54g03.r1 Mus musculus cDNA, 3 end /clone=IMAGE-1080532 /clone_end=3 /gb=AA793009 /gi=2855964 /ug=Mm.12669 /len=341                                                   | 1.8    | 0.7     |
| 101368_at   | Cluster Incl M32484:Placentae and embryos oncofetal gene /cds=(106,738) /gb=M32484 /gi=200286 /ug=Mm.6923 /len=853                                                                           | 1      | 0.7     |
| 97518_at    | Cluster Incl D29016:Mouse mRNA for squalene synthase /cds=(20,1270) /gb=D29016 /gi=468456 /ug=Mm.3204 /len=1634                                                                              | 0.8    | 0.7     |
| 101676_at   | Cluster Incl U13705:Glutathione peroxidase 3 /cds=(16,696) /gb=U13705 /gi=536927 /ug=Mm.7156 /len=1415                                                                                       | 0.7    | 0.7     |
| 93543_f_at  | Cluster Incl J03952:Mouse, glutathione transferase GT8.7 mRNA, complete cds /cds=(12,668) /gb=J03952 /gi=193687 /ug=Mm.2011 /len=1018                                                        | 0.7    | 0.7     |

|             |                                                                                                                                                                                                                                    |      |      |
|-------------|------------------------------------------------------------------------------------------------------------------------------------------------------------------------------------------------------------------------------------|------|------|
| 93569_f_at  | Cluster Incl AI853444:UI-M-BH0-ajy-d-09-0-UI.s1 Mus musculus cDNA, 3 end /clone=UI-M-BH0-ajy-d-09-0-UI /clone_end=3 /gb=AI853444 /gi=5497350 /ug=Mm.204 /len=363                                                                   | 0.6  | 0.7  |
| 98045_s_at  | Cluster Incl U18869:Mus musculus mitogen-responsive 96 kDa phosphoprotein p96 mRNA, alternatively spliced p67 mRNA, and alternatively spliced p93 mRNA, complete cds /cds=(216,2516) /gb=U18869 /gi=1176369 /ug=Mm.34248 /len=3347 | 0.6  | 0.7  |
| 94831_at    | Cluster Incl M65270:Mouse cathepsin B gene /cds=(25,1044) /gb=M65270 /gi=309151 /ug=Mm.22753 /len=1848                                                                                                                             | 0.6  | 0.7  |
| 99561_f_at  | Cluster Incl AF087825:Mus musculus claudin-7 mRNA, complete cds /cds=(0,635) /gb=AF087825 /gi=4191357 /ug=Mm.42189 /len=636                                                                                                        | 0.6  | 0.7  |
| 160493_at   | Cluster Incl D16432:Cd63 antigen /cds=(54,770) /gb=D16432 /gi=484052 /ug=Mm.4426 /len=878 /NOTE=replacement for probe set(s) 100045_at on MG-U74A                                                                                  | 0.5  | 0.7  |
| 97444_at    | Cluster Incl AI844520:UI-M-AJ1-ahf-a-08-0-UI.s2 Mus musculus cDNA, 3 end /clone=UI-M-AJ1-ahf-a-08-0-UI /clone_end=3 /gb=AI844520 /gi=5488426 /ug=Mm.30241 /len=491                                                                 | 0.9  | 0.6  |
| 99535_at    | Cluster Incl AW047630:UI-M-BH1-akm-g-06-0-UI.s1 Mus musculus cDNA, 3 end /clone=UI-M-BH1-akm-g-06-0-UI /clone_end=3 /gb=AW047630 /gi=5908159 /ug=Mm.42187 /len=385                                                                 | 0.8  | 0.6  |
| 95350_at    | Cluster Incl D00073:Transthyretin /cds=(26,469) /gb=D00073 /gi=220561 /ug=Mm.2108 /len=680                                                                                                                                         | 0.8  | 0.6  |
| 103357_at   | Cluster Incl X15684:Solute carrier family 2 (facilitated glucose transporter), member 2 /cds=(63,1634) /gb=X15684 /gi=51090 /ug=Mm.18443 /len=2491                                                                                 | 0.7  | 0.6  |
| 93785_at    | Cluster Incl M64782:Mouse folate-binding protein 1 (FBP1) mRNA, complete cds /cds=(59,826) /gb=M64782 /gi=193227 /ug=Mm.2135 /len=979                                                                                              | 0.7  | 0.6  |
| 104717_at   | Cluster Incl AI848330:UI-M-AH1-ago-b-10-0-UI.s1 Mus musculus cDNA, 3 end /clone=UI-M-AH1-ago-b-10-0-UI /clone_end=3 /gb=AI848330 /gi=5492236 /ug=Mm.24505 /len=456                                                                 | 0.6  | 0.6  |
| 103818_at   | Cluster Incl AJ012754:Mus musculus mRNA for glycoprotein-associated amino acid transporter y+LAT1a /cds=(257,1789) /gb=AJ012754 /gi=3970790 /ug=Mm.20906 /len=2158                                                                 | 0.6  | 0.6  |
| 101019_at   | Cluster Incl U74683:Cathepsin C /cds=(67,1455) /gb=U74683 /gi=2145015 /ug=Mm.684 /len=1767                                                                                                                                         | 0.6  | 0.6  |
| 98627_at    | Cluster Incl X81580:Insulin-like growth factor binding protein 2 /cds=(71,988) /gb=X81580 /gi=550378 /ug=Mm.38748 /len=1310                                                                                                        | 0.6  | 0.6  |
| 97132_at    | Cluster Incl AA189890:mu55b11.r1 Mus musculus cDNA, 5 end /clone=IMAGE-643293 /clone_end=5 /gb=AA189890 /gi=1776532 /ug=Mm.34876 /len=344                                                                                          | 0.6  | 0.6  |
| 101106_at   | Cluster Incl AI853331:UI-M-BH0-air-a-07-0-UI.s1 Mus musculus cDNA, 3 end /clone=UI-M-BH0-air-a-07-0-UI /clone_end=3 /gb=AI853331 /gi=5497237 /ug=Mm.7514 /len=347                                                                  | 0.5  | 0.6  |
| 99133_at    | Cluster Incl X14309:Antigen identified by monoclonal antibodies 4F2 /cds=(92,1672) /gb=X14309 /gi=49749 /ug=Mm.4114 /len=1828                                                                                                      | 0.5  | 0.6  |
| 101963_at   | Cluster Incl X06086:Cathepsin L /cds=(68,1072) /gb=X06086 /gi=53046 /ug=Mm.930 /len=1374                                                                                                                                           | 0.5  | 0.6  |
| 100499_at   | Cluster Incl D29797:Mouse mRNA for syntaxin 3A, complete cds /cds=(103,972) /gb=D29797 /gi=924267 /ug=Mm.5122 /len=1073                                                                                                            | 1.1  | 0.5  |
| 97819_at    | Cluster Incl AI843119:UI-M-AK1-aes-f-05-0-UI.s1 Mus musculus cDNA, 3 end /clone=UI-M-AK1-aes-f-05-0-UI /clone_end=3 /gb=AI843119 /gi=5477332 /ug=Mm.282 /len=199                                                                   | 0.9  | 0.5  |
| 104343_f_at | Cluster Incl AI845798:UI-M-AQ1-aeb-h-07-0-UI.s1 Mus musculus cDNA, 3 end /clone=UI-M-AQ1-aeb-h-07-0-UI /clone_end=3 /gb=AI845798 /gi=5489704 /ug=Mm.22526 /len=184                                                                 | 0.6  | 0.5  |
| 104554_at   | Cluster Incl L25674:Mus musculus ear-2 transcription factor mRNA, complete cds /cds=(113,1282) /gb=L25674 /gi=409757 /ug=Mm.2376 /len=1643                                                                                         | 0.6  | 0.5  |
| 101926_at   | Cluster Incl L41495:Mus musculus protein-serine/threonine kinase (pim-2) mRNA, complete cds /cds=UNKNOWN /gb=L41495 /gi=765065 /ug=Mm.932 /len=2039                                                                                | 0.6  | 0.5  |
| 161050_at   | Cluster Incl AI504506:vo06h07.x1 Mus musculus cDNA, 3 end /clone=IMAGE-1040701 /clone_end=3 /gb=AI504506 /gi=4402357 /ug=Mm.4868 /len=187 /NOTE=replacement for probe set(s) 92928_at on MG-U74A                                   | 0.6  | 0.5  |
| 103888_at   | Cluster Incl AA636171:vn15d02.r1 Mus musculus cDNA, 5 end /clone=IMAGE-1021251 /clone_end=5 /gb=AA636171 /gi=2559950 /ug=Mm.21285 /len=392                                                                                         | 0.5  | 0.5  |
| 101451_at   | Cluster Incl AF038939:Mus musculus zinc finger protein (Peg3) mRNA, complete cds /cds=(13,4728) /gb=AF038939 /gi=2791677 /ug=Mm.7952 /len=5560                                                                                     | -0.5 | -0.6 |
| 98330_at    | Cluster Incl D70849:Zinc finger protein of the cerebellum 3 /cds=(538,1938) /gb=D70849 /gi=1345414 /ug=Mm.4265 /len=3509                                                                                                           | -0.8 | -0.7 |
| 96684_at    | Cluster Incl AI846123:UI-M-AN1-afj-a-11-0-UI.s2 Mus musculus cDNA, 3 end /clone=UI-M-AN1-afj-a-11-0-UI /clone_end=3 /gb=AI846123 /gi=5490029 /ug=Mm.27453 /len=341                                                                 | -0.8 | -0.7 |
| 104548_at   | Cluster Incl Y15443:Mus musculus mRNA for 50C15 protein /cds=(20,454) /gb=Y15443 /gi=2624230 /ug=Mm.23697 /len=721                                                                                                                 | -0.9 | -0.8 |
| 99034_at    | Cluster Incl Y15001:Mus musculus mRNA for iroquois homeobox protein 3 /cds=(0,1523) /gb=Y15001 /gi=2765437 /ug=Mm.39039 /len=1937                                                                                                  | -1   | -0.9 |
| 98817_at    | Cluster Incl Z29532:M.musculus mRNA for follistatin /cds=(0,1031) /gb=Z29532 /gi=488368 /ug=Mm.4913 /len=1123                                                                                                                      | -0.6 | -1   |
| 104716_at   | Cluster Incl X60367:Retinol binding protein 1, cellular /cds=UNKNOWN /gb=X60367 /gi=50547 /ug=Mm.2450 /len=2633                                                                                                                    | -1   | -1   |
| 93941_at    | Cluster Incl X51683:Brachyury /cds=(108,1418) /gb=X51683 /gi=55053 /ug=Mm.913 /len=2046                                                                                                                                            | -1.4 | -1.4 |
| 92931_at    | Cluster Incl X80903:Delta-like 1 homolog (Drosophila) /cds=(13,2181) /gb=X80903 /gi=806569 /ug=Mm.4875 /len=2857                                                                                                                   | -2   | -1.5 |
| 97386_at    | Cluster Incl AI853294:UI-M-BH0-ajl-f-03-0-UI.s1 Mus musculus cDNA, 3 end /clone=UI-M-BH0-ajl-f-03-0-UI /clone_end=3 /gb=AI853294 /gi=5497200 /ug=Mm.29789 /len=413                                                                 | -1.5 | -1.6 |
| 160254_at   | Cluster Incl AW123191:UI-M-BH2.1-agg-b-09-0-UI.s1 Mus musculus cDNA, 3 end /clone=UI-M-BH2.1-agg-b-09-0-UI /clone_end=3 /gb=AW123191 /gi=6098761 /ug=Mm.27846 /len=339 /NOTE=replacement for probe set(s) 97245_at on MG-U74A      | -1.6 | -1.7 |

|             |                                                                                                                                                                                                                           |      |      |
|-------------|---------------------------------------------------------------------------------------------------------------------------------------------------------------------------------------------------------------------------|------|------|
| 93611_at    | Cluster Incl U57331:T-box 6 /cds=(24,1646) /gb=U57331 /gi=1620601 /ug=Mm.727 /len=1712                                                                                                                                    | -1.6 | -1.8 |
| 93888_at    | Cluster Incl X53063:Homeo box B1 /cds=(95,988) /gb=X53063 /gi=51398 /ug=Mm.890 /len=1526                                                                                                                                  | -1.7 | -1.8 |
| 102667_at   | Cluster Incl X56842:Wingless-related MMTV integration site 3A /cds=(128,1186) /gb=X56842 /gi=55433 /ug=Mm.1367 /len=2814                                                                                                  | -2.9 | -3.2 |
| 98028_at    | Cluster Incl M63649:Twist gene homolog, (Drosophila) /cds=(166,786) /gb=M63649 /gi=202243 /ug=Mm.3280 /len=1485                                                                                                           | -3.2 | -3.6 |
| 94200_at    | Cluster Incl Z48800:Gastrulation brain homeobox 2 /cds=(421,1467) /gb=Z48800 /gi=755766 /ug=Mm.1306 /len=2126                                                                                                             | -5.4 | -4.4 |
| 95297_at    | Cluster Incl M22115:Homeo box A1 /cds=(80,1075) /gb=M22115 /gi=193047 /ug=Mm.197 /len=2216                                                                                                                                | -5.1 | -4.5 |
| 103477_at   | Cluster Incl M80463:Caudal type homeo box 1 /cds=(0,578) /gb=M80463 /gi=402307 /ug=Mm.21968 /len=579                                                                                                                      | -4.2 | -4.9 |
| 96038_at    | Cluster Incl AI840339:UI-M-AJ0-abd-g-01-0-UI.s2 Mus musculus cDNA, 3 end /clone=UI-M-AJ0-abd-g-01-0-UI /clone_end=3 /gb=AI840339 /gi=5474552 /ug=Mm.2587 /len=497                                                         | 1    | 3.2  |
| 95954_at    | Cluster Incl AA437728:vd19h10.s1 Mus musculus cDNA, 5 end /clone=IMAGE-793027 /clone_end=5 /gb=AA437728 /gi=2142642 /ug=Mm.24927 /len=159                                                                                 | 0.9  | 3.2  |
| 160401_r_at | Cluster Incl AI931748:ul65b03.x1 Mus musculus cDNA, 3 end /clone=IMAGE-2135405 /clone_end=3 /gb=AI931748 /gi=5668233 /ug=Mm.30266 /len=519 /NOTE=replacement for probe set(s) 97457_at on MG-U74A                         | 1.9  | 3    |
| 103795_f_at | Cluster Incl AA986114:uc81h03.x1 Mus musculus cDNA, 3 end /clone=IMAGE-1432085 /clone_end=3 /gb=AA986114 /gi=3167989 /ug=Mm.24982 /len=580                                                                                | 1.2  | 2.9  |
| 95511_at    | Cluster Incl X69902:Integrin alpha 6 /cds=(181,3402) /gb=X69902 /gi=408127 /ug=Mm.25232 /len=3756                                                                                                                         | 0.9  | 2.9  |
| 104419_at   | Cluster Incl AI132380:ue24a03.x1 Mus musculus cDNA, 3 end /clone=IMAGE-1481260 /clone_end=3 /gb=AI132380 /gi=3602396 /ug=Mm.28928 /len=441                                                                                | 0.7  | 2.9  |
| 96868_at    | Cluster Incl AI196896:ui55b05.y1 Mus musculus cDNA, 5 end /clone=IMAGE-1886289 /clone_end=5 /gb=AI196896 /gi=3749502 /ug=Mm.30063 /len=1011                                                                               | 0.5  | 2.7  |
| 103806_at   | Cluster Incl AF064984:Low density lipoprotein-related protein 5 /cds=(112,4956) /gb=AF064984 /gi=3641528 /ug=Mm.20876 /len=5119                                                                                           | 0.5  | 2.4  |
| 102959_at   | Cluster Incl U61363:Mus musculus groucho-related gene 4 protein (Grg4) mRNA, partial cds /cds=(0,1733) /gb=U61363 /gi=4028901 /ug=Mm.17915 /len=1930                                                                      | 0.6  | 2.2  |
| 92430_at    | Cluster Incl AW045710:UI-M-BH1-akq-e-01-0-UI.s1 Mus musculus cDNA, 3 end /clone=UI-M-BH1-akq-e-01-0-UI /clone_end=3 /gb=AW045710 /gi=5906239 /ug=Mm.4152 /len=446                                                         | 1.1  | 1.6  |
| 102232_at   | Cluster Incl AI850740:UI-M-BG1-ail-g-10-0-UI.s1 Mus musculus cDNA, 3 end /clone=UI-M-BG1-ail-g-10-0-UI /clone_end=3 /gb=AI850740 /gi=5494646 /ug=Mm.1040 /len=404                                                         | 0.6  | 1.3  |
| 97317_at    | Cluster Incl AW122933:UI-M-BH2.1-apa-h-09-0-UI.s1 Mus musculus cDNA, 3 end /clone=UI-M-BH2.1-apa-h-09-0-UI /clone_end=3 /gb=AW122933 /gi=6098463 /ug=Mm.28107 /len=399                                                    | 1.5  | 1.2  |
| 98000_at    | Cluster Incl J04634:Lymphocyte antigen 64 /cds=(194,1915) /gb=J04634 /gi=191943 /ug=Mm.3177 /len=2111                                                                                                                     | 1.1  | 1.1  |
| 160369_at   | Cluster Incl AI849109:UI-M-AH1-agw-h-03-0-UI.s1 Mus musculus cDNA, 3 end /clone=UI-M-AH1-agw-h-03-0-UI /clone_end=3 /gb=AI849109 /gi=5493015 /ug=Mm.29921 /len=374 /NOTE=replacement for probe set(s) 96312_at on MG-U74A | 0.7  | 1.1  |
| 99378_f_at  | Cluster Incl M18837:Mouse MHC class I Q4 beta-2-microglobulin (Qb-1) gene, complete cds /cds=(0,980) /gb=M18837 /gi=199323 /ug=Mm.56926 /len=981                                                                          | 0.6  | 1.1  |
| 104210_at   | Cluster Incl AI839082:UI-M-AK0-adi-f-03-0-UI.s1 Mus musculus cDNA, 3 end /clone=UI-M-AK0-adi-f-03-0-UI /clone_end=3 /gb=AI839082 /gi=5473295 /ug=Mm.2775 /len=212                                                         | 1    | 1    |
| 103868_at   | Cluster Incl AA681274:vr76e12.s1 Mus musculus cDNA, 5 end /clone=IMAGE-1134670 /clone_end=5 /gb=AA681274 /gi=2663414 /ug=Mm.21138 /len=412                                                                                | 0.7  | 0.9  |
| 103502_at   | Cluster Incl AA866768:ud07g06.r1 Mus musculus cDNA, 5 end /clone=IMAGE-1434490 /clone_end=5 /gb=AA866768 /gi=2962213 /ug=Mm.22367 /len=376                                                                                | 0.6  | 0.9  |
| 99501_at    | Cluster Incl AA882416:vx44e09.r1 Mus musculus cDNA, 5 end /clone=IMAGE-1278088 /clone_end=5 /gb=AA882416 /gi=2991527 /ug=Mm.41684 /len=571                                                                                | 0.5  | 0.9  |
| 95661_at    | Cluster Incl L08115:CD9 antigen /cds=(54,734) /gb=L08115 /gi=388911 /ug=Mm.2956 /len=1130                                                                                                                                 | 0.5  | 0.9  |
| 96771_at    | Cluster Incl AI006228:ua88d09.r1 Mus musculus cDNA, 5 end /clone=IMAGE-1364561 /clone_end=5 /gb=AI006228 /gi=3215837 /ug=Mm.29023 /len=382                                                                                | 1    | 0.8  |
| 100095_at   | Cluster Incl U37799:Scavenger receptor class B1 /cds=(50,1579) /gb=U37799 /gi=1167551 /ug=Mm.4603 /len=1785                                                                                                               | 0.9  | 0.8  |
| 95702_at    | Cluster Incl AI461803:uc43c04.x1 Mus musculus cDNA, 3 end /clone=IMAGE-1400742 /clone_end=3 /gb=AI461803 /gi=4315833 /ug=Mm.29697 /len=481                                                                                | 1.2  | 0.7  |
| 104714_at   | Cluster Incl AW125299:UI-M-BH2.1-apy-c-05-0-UI.s1 Mus musculus cDNA, 3 end /clone=UI-M-BH2.1-apy-c-05-0-UI /clone_end=3 /gb=AW125299 /gi=6100829 /ug=Mm.24477 /len=374                                                    | 0.6  | 0.7  |
| 103716_at   | Cluster Incl AI851218:UI-M-BH0-ajx-g-06-0-UI.s1 Mus musculus cDNA, 3 end /clone=UI-M-BH0-ajx-g-06-0-UI /clone_end=3 /gb=AI851218 /gi=5495124 /ug=Mm.24160 /len=306                                                        | 0.6  | 0.7  |
| 103377_at   | Cluster Incl AW259788:um81b12.y1 Mus musculus cDNA, 5 end /clone=IMAGE-2317727 /clone_end=5 /gb=AW259788 /gi=6632769 /ug=Mm.18600 /len=507                                                                                | 0.5  | 0.7  |
| 162245_f_at | Cluster Incl AV332872:AV332872 Mus musculus cDNA, 3 end /clone=6330539N18 /clone_end=3 /gb=AV332872 /gi=6372924 /ug=Mm.99066 /len=268 /NOTE=replacement for probe set(s) 100253_f_at on MG-U74A                           | 1.2  | 0.6  |
| 92644_s_at  | Cluster Incl M12848:Mouse myb proto-oncogene mRNA encoding 71 kd myb protein, complete cds /cds=(161,2071) /gb=M12848 /gi=199934 /ug=Mm.1202 /len=3310                                                                    | 1    | 0.6  |
| 93953_at    | Cluster Incl D89871:Mus musculus mRNA for serine protease, complete cds /cds=(244,2529) /gb=D89871 /gi=2696702 /ug=Mm.9431 /len=2614                                                                                      | 0.7  | 0.6  |
| 102235_at   | Cluster Incl X13945:Lung carcinoma myc related oncogene 1 /cds=(0,1106) /gb=X13945 /gi=53287 /ug=Mm.1055 /len=3076                                                                                                        | 0.7  | 0.6  |

|            |                                                                                                                                                                                                                           |      |      |
|------------|---------------------------------------------------------------------------------------------------------------------------------------------------------------------------------------------------------------------------|------|------|
| 97722_at   | Cluster Incl AA879709:vv97e03.r1 Mus musculus cDNA, 5 end /clone=IMAGE-1230364 /clone_end=5 /gb=AA879709 /gi=2988692 /ug=Mm.39052 /len=404                                                                                | 0.5  | 0.6  |
| 94461_at   | Cluster Incl AI852144:UI-M-BH0-ajb-e-09-0-UI.s1 Mus musculus cDNA, 3 end /clone=UI-M-BH0-ajb-e-09-0-UI /clone_end=3 /gb=AI852144 /gi=5496055 /ug=Mm.28830 /len=425                                                        | 0.5  | 0.6  |
| 96491_at   | Cluster Incl AI035632:ue19f09.x1 Mus musculus cDNA, 3 end /clone=IMAGE-1480841 /clone_end=3 /gb=AI035632 /gi=3259323 /ug=Mm.25185 /len=768                                                                                | 1.1  | 0.5  |
| 160904_at  | Cluster Incl AI841484:UI-M-AH0-acy-c-05-0-UI.s1 Mus musculus cDNA, 3 end /clone=UI-M-AH0-acy-c-05-0-UI /clone_end=3 /gb=AI841484 /gi=5475697 /ug=Mm.5166 /len=412 /NOTE=replacement for probe set(s) 100506_at on MG-U74A | 0.9  | 0.5  |
| 92699_at   | Cluster Incl AJ249198:Mus musculus mRNA for glycoprotein-associated amino acid transporter b0,+AT1 /cds=(326,1789) /gb=AJ249198 /gi=5824164 /ug=Mm.45874 /len=1930                                                        | 0.7  | 0.5  |
| 103977_at  | Cluster Incl AF087644:Coagulation factor X /cds=(0,1445) /gb=AF087644 /gi=3641315 /ug=Mm.2578 /len=1486                                                                                                                   | 0.7  | 0.5  |
| 96781_at   | Cluster Incl AI838293:UI-M-AO0-aby-c-04-0-UI.s1 Mus musculus cDNA, 3 end /clone=UI-M-AO0-aby-c-04-0-UI /clone_end=3 /gb=AI838293 /gi=5472506 /ug=Mm.29072 /len=310                                                        | 0.6  | 0.5  |
| 99591_i_at | Cluster Incl AB030505:Mus musculus mRNA for UBE-1c1, UBE-1c2, UBE-1c3, complete cds /cds=UNKNOWN /gb=AB030505 /gi=5668736 /ug=Mm.42795 /len=4190                                                                          | 0.6  | 0.5  |
| 96269_at   | Cluster Incl AA716963:vu69f10.r1 Mus musculus cDNA, 5 end /clone=IMAGE-1196683 /clone_end=5 /gb=AA716963 /gi=2729237 /ug=Mm.29847 /len=273                                                                                | 0.5  | 0.5  |
| 102370_at  | Cluster Incl AA822174:vp36a09.r1 Mus musculus cDNA, 5 end /clone=IMAGE-1078744 /clone_end=5 /gb=AA822174 /gi=2892042 /ug=Mm.1187 /len=329                                                                                 | 0.5  | 0.5  |
| 103665_at  | Cluster Incl AW122523:UI-M-BH2.2-aox-b-05-0-UI.s1 Mus musculus cDNA, 3 end /clone=UI-M-BH2.2-aox-b-05-0-UI /clone_end=3 /gb=AW122523 /gi=6098047 /ug=Mm.20697 /len=423                                                    | 0.5  | 0.5  |
| 97013_f_at | Cluster Incl AW046124:UI-M-BH1-alf-e-03-0-UI.s1 Mus musculus cDNA, 3 end /clone=UI-M-BH1-alf-e-03-0-UI /clone_end=3 /gb=AW046124 /gi=5906653 /ug=Mm.88950 /len=249                                                        | 0.5  | 0.5  |
| 100600_at  | Cluster Incl M58661:CD24a antigen /cds=(72,302) /gb=M58661 /gi=198985 /ug=Mm.6417 /len=1800                                                                                                                               | -0.5 | -0.5 |
| 100407_at  | Cluster Incl L38580:Galanin /cds=(0,374) /gb=L38580 /gi=927115 /ug=Mm.4655 /len=553                                                                                                                                       | -0.5 | -0.5 |
| 95016_at   | Cluster Incl D50086:Mouse mRNA for neuropilin, complete cds /cds=(347,3118) /gb=D50086 /gi=1783300 /ug=Mm.27448 /len=3652                                                                                                 | -0.5 | -0.5 |
| 101001_at  | Cluster Incl AI647612:uk41h01.x1 Mus musculus cDNA, 3 end /clone=IMAGE-1971601 /clone_end=3 /gb=AI647612 /gi=4726290 /ug=Mm.6766 /len=524                                                                                 | -0.7 | -0.5 |
| 103628_at  | Cluster Incl D16503:Lymphoid enhancer binding factor 1 /cds=(1804,2658) /gb=D16503 /gi=391762 /ug=Mm.2029 /len=2740                                                                                                       | -0.5 | -0.6 |
| 94449_at   | Cluster Incl AI854522:UI-M-BH0-ajj-d-05-0-UI.s1 Mus musculus cDNA, 3 end /clone=UI-M-BH0-ajj-d-05-0-UI /clone_end=3 /gb=AI854522 /gi=5498428 /ug=Mm.28785 /len=358                                                        | -0.5 | -0.6 |
| 97509_f_at | Cluster Incl U22324:Mus musculus fibroblast growth factor receptor-1 mRNA, long isoform precursor, complete cds /cds=(57,2525) /gb=U22324 /gi=722340 /ug=Mm.3157 /len=2526                                                | -0.6 | -0.6 |
| 97520_s_at | Cluster Incl X83569:Neuronatin /cds=(66,230) /gb=X83569 /gi=619499 /ug=Mm.3210 /len=1102                                                                                                                                  | -0.7 | -0.6 |
| 101973_at  | Cluster Incl Y15163:Mus musculus mRNA for mrg1 protein /cds=(219,1028) /gb=Y15163 /gi=3059126 /ug=Mm.9524 /len=1943                                                                                                       | -0.7 | -0.7 |
| 100403_at  | Cluster Incl AA839903:vw65f04.r1 Mus musculus cDNA, 5 end /clone=IMAGE-1259839 /clone_end=5 /gb=AA839903 /gi=2916497 /ug=Mm.46514 /len=250                                                                                | -0.8 | -0.7 |
| 92997_g_at | Cluster Incl D49473:SRV-box containing gene 17 /cds=(642,1517) /gb=D49473 /gi=1487865 /ug=Mm.5080 /len=1984                                                                                                               | -0.8 | -0.7 |
| 98419_at   | Cluster Incl Z15103:Mesenchyme homeobox 1 /cds=UNKNOWN /gb=Z15103 /gi=57939 /ug=Mm.3404 /len=2182                                                                                                                         | -1   | -0.7 |
| 98852_at   | Cluster Incl X97581:M.musculus mRNA for spalt transcription factor /cds=(0,3972) /gb=X97581 /gi=1296844 /ug=Mm.5089 /len=4126                                                                                             | -0.6 | -0.8 |
| 102833_at  | Cluster Incl AW046220:UI-M-BH1-akw-h-08-0-UI.s1 Mus musculus cDNA, 3 end /clone=UI-M-BH1-akw-h-08-0-UI /clone_end=3 /gb=AW046220 /gi=5906749 /ug=Mm.14547 /len=383                                                        | -0.7 | -0.8 |
| 100127_at  | Cluster Incl M35523:Cellular retinoic acid binding protein II /cds=(115,531) /gb=M35523 /gi=192705 /ug=Mm.4757 /len=868                                                                                                   | -0.8 | -0.8 |
| 97497_at   | Cluster Incl Z11886:Notch gene homolog 1, (Drosophila) /cds=(78,7673) /gb=Z11886 /gi=288502 /ug=Mm.31255 /len=8064                                                                                                        | -1.3 | -0.8 |
| 93724_at   | Cluster Incl AI596034:uk22a01.x1 Mus musculus cDNA, 3 end /clone=IMAGE-1969704 /clone_end=3 /gb=AI596034 /gi=4605082 /ug=Mm.86922 /len=516                                                                                | -0.5 | -0.9 |
| 94400_at   | Cluster Incl AI843094:UI-M-AK1-aes-c-08-0-UI.s1 Mus musculus cDNA, 3 end /clone=UI-M-AK1-aes-c-08-0-UI /clone_end=3 /gb=AI843094 /gi=5477307 /ug=Mm.25783 /len=349                                                        | -0.6 | -0.9 |
| 97977_at   | Cluster Incl AA645293:vs81a07.r1 Mus musculus cDNA, 5 end /clone=IMAGE-1152660 /clone_end=5 /gb=AA645293 /gi=2571722 /ug=Mm.3116 /len=276                                                                                 | -0.9 | -0.9 |
| 99086_g_at | Cluster Incl AI021421:ub12a08.r1 Mus musculus cDNA, 5 end /clone=IMAGE-1366742 /clone_end=5 /gb=AI021421 /gi=3235757 /ug=Mm.38976 /len=470                                                                                | -1.3 | -0.9 |
| 94036_at   | Cluster Incl AI844806:UI-M-AH1-agx-b-02-0-UI.s1 Mus musculus cDNA, 3 end /clone=UI-M-AH1-agx-b-02-0-UI /clone_end=3 /gb=AI844806 /gi=5488712 /ug=Mm.21921 /len=404                                                        | -0.6 | -1   |
| 104672_at  | Cluster Incl U68058:Secreted frizzled-related sequence protein 3 /cds=(12,983) /gb=U68058 /gi=1688096 /ug=Mm.3246 /len=2176                                                                                               | -1.1 | -1   |
| 98831_at   | Cluster Incl L13204:HNF-3/forkhead homolog 4 /cds=(153,1418) /gb=L13204 /gi=550487 /ug=Mm.4985 /len=2427                                                                                                                  | -1.2 | -1   |
| 98427_s_at | Cluster Incl M57999:Nuclear factor of kappa light chain gene enhancer in B-cells 1, p105 /cds=(291,3206) /gb=M57999 /gi=201931 /ug=Mm.3420 /len=3892                                                                      | -1.3 | -1.1 |
| 94117_f_at | Cluster Incl AF026465:Putative neuronal cell adhesion molecule /cds=(226,2607) /gb=AF026465 /gi=3068591 /ug=Mm.10689 /len=3146                                                                                            | -1.2 | -1.2 |

|             |                                                                                                                                                                                                                                           |      |      |
|-------------|-------------------------------------------------------------------------------------------------------------------------------------------------------------------------------------------------------------------------------------------|------|------|
| 98108_at    | Cluster Incl X15789:Murine CRABP mRNA for cellular retinoic acid binding protein /cds=(0,413) /gb=X15789 /gi=49659 /ug=Mm.34797 /len=647                                                                                                  | -1.5 | -1.3 |
| 94813_at    | Cluster Incl X65128:Growth arrest specific 1 /cds=(424,1578) /gb=X65128 /gi=51045 /ug=Mm.22701 /len=2961                                                                                                                                  | -1   | -1.4 |
| 103460_at   | Cluster Incl AI849939:UI-M-BG0-ahz-g-03-0-UI.s1 Mus musculus cDNA, 3 end /clone=UI-M-BG0-ahz-g-03-0-UI /clone_end=3 /gb=AI849939 /gi=5493845 /ug=Mm.21697 /len=440                                                                        | -1.9 | -1.5 |
| 99390_at    | Cluster Incl M89798:Wingless-related MMTV integration site 5A /cds=(550,1689) /gb=M89798 /gi=202403 /ug=Mm.56963 /len=1690                                                                                                                | -1.6 | -1.8 |
| 102755_at   | Cluster Incl AB016496:Mus musculus mRNA for intelectin, complete cds /cds=(79,1020) /gb=AB016496 /gi=3357908 /ug=Mm.12924 /len=1178                                                                                                       | -2.8 | -2.8 |
| 99361_at    | Cluster Incl Z68889:M.musculus mRNA for wnt-8D protein /cds=(56,1120) /gb=Z68889 /gi=1419029 /ug=Mm.558 /len=1747                                                                                                                         | -2.4 | -3   |
| 97742_s_at  | Cluster Incl D12483:Fibroblast growth factor 8 /cds=(199,1005) /gb=D12483 /gi=220326 /ug=Mm.4012 /len=1178                                                                                                                                | 1.7  | 4    |
| 162276_i_at | Cluster Incl AV367855:AV367855 Mus musculus cDNA, 3 end /clone=8430438I18 /clone_end=3 /gb=AV367855 /gi=6415502 /ug=Mm.99631 /len=198 /NOTE=replacement for probe set(s) 100646_f_at on MG-U74A                                           | 1.8  | 1.5  |
| 97413_at    | Cluster Incl AI121305:uc30b06.r1 Mus musculus cDNA, 5 end /clone=IMAGE-1399475 /clone_end=5 /gb=AI121305 /gi=3521629 /ug=Mm.29959 /len=358                                                                                                | 3    | 0.7  |
| 160702_at   | Cluster Incl AA791885:vs54g07.r1 Mus musculus cDNA, 5 end /clone=IMAGE-1150140 /clone_end=5 /gb=AA791885 /gi=2854840 /ug=Mm.23713 /len=390 /NOTE=replacement for probe set(s) 104552_at on MG-U74A                                        | 0.5  | 0.6  |
| 96841_at    | Cluster Incl AW046627:UI-M-BH1-ald-c-09-0-UI.s1 Mus musculus cDNA, 3 end /clone=UI-M-BH1-ald-c-09-0-UI /clone_end=3 /gb=AW046627 /gi=5907156 /ug=Mm.30018 /len=268                                                                        | 0.5  | 0.5  |
| 129147_r_at | Cluster Incl AI931796:ul66a05.x1 Mus musculus cDNA, 3 end /clone=IMAGE-2135504 /clone_end=3 /gb=AI931796 /gi=5668281 /ug=Mm.19539 /len=263                                                                                                | 0.9  | 0.7  |
| 130491_at   | Cluster Incl AI853281:UI-M-BH0-ajl-e-01-0-UI.s1 Mus musculus cDNA, 3 end /clone=UI-M-BH0-ajl-e-01-0-UI /clone_end=3 /gb=AI853281 /gi=5497187 /ug=Mm.41901 /len=353                                                                        | 0.6  | 1    |
| 130494_f_at | Cluster Incl AI891509:ul59e01.x1 Mus musculus cDNA, 3 end /clone=IMAGE-2123352 /clone_end=3 /gb=AI891509 /gi=5597411 /ug=Mm.41961 /len=504                                                                                                | 0.5  | 0.5  |
| 131000_f_at | Cluster Incl AI154242:ud30f03.r1 Mus musculus cDNA, 5 end /clone=IMAGE-1447421 /clone_end=5 /gb=AI154242 /gi=3682711 /ug=Mm.28880 /len=389                                                                                                | 0.8  | 0.8  |
| 131216_f_at | Cluster Incl AI463306:vw61a06.x1 Mus musculus cDNA, 3 end /clone=IMAGE-1248274 /clone_end=3 /gb=AI463306 /gi=4317336 /ug=Mm.23689 /len=455                                                                                                | 1.2  | 0.7  |
| 138014_at   | Cluster Incl AI846692:UI-M-AN1-afi-f-02-0-UI.s1 Mus musculus cDNA, 3 end /clone=UI-M-AN1-afi-f-02-0-UI /clone_end=3 /gb=AI846692 /gi=5490598 /ug=Mm.39488 /len=257                                                                        | 1.2  | 0.9  |
| 141090_f_at | Cluster Incl AA725961:vu85f09.r1 Mus musculus cDNA, 5 end /clone=IMAGE-1198217 /clone_end=5 /gb=AA725961 /gi=2743668 /ug=Mm.76286 /len=287                                                                                                | 0.6  | 0.7  |
| 165449_f_at | Cluster Incl AI848527:UI-M-AP1-agf-e-12-0-UI.s2 Mus musculus cDNA, 3 end /clone=UI-M-AP1-agf-e-12-0-UI /clone_end=3 /gb=AI848527 /gi=5492433 /ug=Mm.32920 /len=387 /NOTE=replacement for probe set(s) 132394_f_at on MG-U74C              | 0.5  | 0.7  |
| 165599_at   | Cluster Incl AW060997:UI-M-BH1-amn-d-02-0-UI.s1 Mus musculus cDNA, 3 end /clone=UI-M-BH1-amn-d-02-0-UI /clone_end=3 /gb=AW060997 /gi=6008748 /ug=Mm.23587 /len=260 /NOTE=replacement for probe set(s) 131211_i_at, 131212_r_at on MG-U74C | 0.6  | 0.5  |
| 165601_f_at | Cluster Incl AA021940:mh83d03.r1 Mus musculus cDNA, 5 end /clone=IMAGE-457541 /clone_end=5 /gb=AA021940 /gi=1485705 /ug=Mm.23666 /len=424 /NOTE=replacement for probe set(s) 131215_f_at on MG-U74C                                       | 0.9  | 0.9  |
| 165656_i_at | Cluster Incl AI448522:mp66c10.x1 Mus musculus cDNA, 3 end /clone=IMAGE-574194 /clone_end=3 /gb=AI448522 /gi=4283309 /ug=Mm.32022 /len=168 /NOTE=replacement for probe set(s) 130984_r_at on MG-U74C                                       | 0.9  | 0.9  |
| 165677_at   | Cluster Incl AI876331:uk59h01.y1 Mus musculus cDNA, 5 end /clone=IMAGE-1973329 /clone_end=5 /gb=AI876331 /gi=5550380 /ug=Mm.33150 /len=306 /NOTE=replacement for probe set(s) 130944_at on MG-U74C                                        | 0.5  | 0.5  |
| 165695_at   | Cluster Incl AI527248:uj50e02.x1 Mus musculus cDNA, 3 end /clone=IMAGE-1923386 /clone_end=3 /gb=AI527248 /gi=4441383 /ug=Mm.33803 /len=540 /NOTE=replacement for probe set(s) 130906_at on MG-U74C                                        | 0.7  | 0.9  |
| 165915_i_at | Cluster Incl AV228304:AV228304 Mus musculus cDNA, 3 end /clone=4432415C24 /clone_end=3 /gb=AV228304 /gi=6180823 /ug=Mm.46240 /len=277 /NOTE=replacement for probe set(s) 130223_r_at on MG-U74C                                           | 0.7  | 0.5  |
| 166226_f_at | Cluster Incl AV225951:AV225951 Mus musculus cDNA, 3 end /clone=3830432J18 /clone_end=3 /gb=AV225951 /gi=6177266 /ug=Mm.77420 /len=236 /NOTE=replacement for probe set(s) 128528_f_at on MG-U74C                                           | 0.5  | 0.9  |
| 166567_f_at | Cluster Incl AV150568:AV150568 Mus musculus cDNA /clone=2900006M09 /clone_end=3 /gb=AV150568 /gi=5355774 /ug=Mm.100399 /len=270 /NOTE=replacement for probe set(s) 128980_f_at on MG-U74C                                                 | -0.8 | -0.7 |
| 167118_f_at | Cluster Incl AV020777:AV020777 Mus musculus cDNA /clone=1190020D07 /clone_end=3 /gb=AV020777 /gi=4797769 /ug=Mm.45800 /len=198 /NOTE=replacement for probe set(s) 140018_s_at on MG-U74C                                                  | 0.5  | 0.6  |
| 167188_at   | Cluster Incl AA673840:vo82f02.r1 Mus musculus cDNA, 5 end /clone=IMAGE-1065627 /clone_end=5 /gb=AA673840 /gi=2647122 /ug=Mm.45996 /len=498 /NOTE=replacement for probe set(s) 140217_at on MG-U74C                                        | 0.8  | 0.8  |
| 167192_at   | Cluster Incl AW215882:up02f02.x1 Mus musculus cDNA, 3 end /clone=IMAGE-2650875 /clone_end=3 /gb=AW215882 /gi=6526585 /ug=Mm.46043 /len=228 /NOTE=replacement for probe set(s) 140223_at on MG-U74C                                        | 0.5  | 0.6  |
| 167479_at   | Cluster Incl AW124333:UI-M-BH2.1-apq-f-04-0-UI.s1 Mus musculus cDNA, 3 end /clone=UI-M-BH2.1-apq-f-04-0-UI /clone_end=3 /gb=AW124333 /gi=6099863 /ug=Mm.63694 /len=224 /NOTE=replacement for probe                                        | 0.9  | 1.3  |

| Label       | Description                                                                                                                                                                                                                | Score 1 | Score 2 |
|-------------|----------------------------------------------------------------------------------------------------------------------------------------------------------------------------------------------------------------------------|---------|---------|
|             | set(s) 140668_at on MG-U74C                                                                                                                                                                                                |         |         |
| 167965_f_at | Cluster Incl AV370033:AV370033 Mus musculus cDNA, 3 end /clone=9030206H02 /clone_end=3 /gb=AV370033 /gi=6417680 /ug=Mm.85143 /len=247 /NOTE=replacement for probe set(s) 133630_r_at on MG-U74C                            | 0.8     | 0.6     |
| 168454_f_at | Cluster Incl AV164866:AV164866 Mus musculus cDNA /clone=3110030E14 /clone_end=3 /gb=AV164866 /gi=5371303 /ug=Mm.95688 /len=301 /NOTE=replacement for probe set(s) 135506_f_at, 135507_r_at on MG-U74C                      | 0.6     | 0.6     |
| 170064_f_at | Cluster Incl AV305824:AV305824 Mus musculus cDNA, 3 end /clone=5730533E06 /clone_end=3 /gb=AV305824 /gi=6338338 /ug=Mm.74027 /len=320 /NOTE=replacement for probe set(s) 131025_f_at on MG-U74C                            | 0.5     | 0.6     |
| 170808_s_at | Cluster Incl AV333550:AV333550 Mus musculus cDNA, 3 end /clone=6330548H01 /clone_end=3 /gb=AV333550 /gi=6373602 /ug=Mm.97546 /len=325 /NOTE=replacement for probe set(s) 132606_at on MG-U74C                              | 0.6     | 0.5     |
| 129046_f_at | Cluster Incl AA118152:mn11b12.r1 Mus musculus cDNA, 5 end /clone=IMAGE-537599 /clone_end=5 /gb=AA118152 /gi=1673183 /ug=Mm.12130 /len=184                                                                                  | 0.5     | 1.1     |
| 129297_at   | Cluster Incl AA265229:mu66d04.r1 Mus musculus cDNA, 5 end /clone=IMAGE-644359 /clone_end=5 /gb=AA265229 /gi=1901439 /ug=Mm.24297 /len=415                                                                                  | 0.5     | 1.3     |
| 133204_at   | Cluster Incl AU044066:AU044066 Mus musculus cDNA, 3 end /clone=J0914D09 /clone_end=3 /gb=AU044066 /gi=3979541 /ug=Mm.17774 /len=419                                                                                        | 0.9     | 2.5     |
| 136134_at   | Cluster Incl AI836316:UI-M-AQ0-aac-h-07-0-UI.s1 Mus musculus cDNA, 3 end /clone=UI-M-AQ0-aac-h-07-0-UI /clone_end=3 /gb=AI836316 /gi=5470524 /ug=Mm.35216 /len=418                                                         | 0.6     | 1.2     |
| 165792_at   | Cluster Incl AI957090:ul75a07.x1 Mus musculus cDNA, 3 end /clone=IMAGE-2136372 /clone_end=3 /gb=AI957090 /gi=5749799 /ug=Mm.42174 /len=479 /NOTE=replacement for probe set(s) 130497_at on MG-U74C                         | 0.9     | 1.1     |
| 128830_r_at | Cluster Incl AA672352:vk91a11.s1 Mus musculus cDNA, 5 end /clone=IMAGE-962012 /clone_end=5 /gb=AA672352 /gi=2644569 /ug=Mm.100122 /len=143                                                                                 | 3.1     | 3.4     |
| 129326_at   | Cluster Incl AI605536:vo35e07.x1 Mus musculus cDNA, 3 end /clone=IMAGE-1051908 /clone_end=3 /gb=AI605536 /gi=4614703 /ug=Mm.24820 /len=234                                                                                 | 2.6     | 1.3     |
| 129347_at   | Cluster Incl AI591631:vt35h03.x1 Mus musculus cDNA, 3 end /clone=IMAGE-1165109 /clone_end=3 /gb=AI591631 /gi=4600679 /ug=Mm.25234 /len=239                                                                                 | 2.8     | 2.1     |
| 129928_f_at | Cluster Incl AW214436:uo48b10.x1 Mus musculus cDNA, 3 end /clone=IMAGE-2645755 /clone_end=3 /gb=AW214436 /gi=6520959 /ug=Mm.89542 /len=620                                                                                 | 1       | 0.8     |
| 130779_f_at | Cluster Incl AI552636:vx31g10.x1 Mus musculus cDNA, 3 end /clone=IMAGE-1276866 /clone_end=3 /gb=AI552636 /gi=4484999 /ug=Mm.34872 /len=365                                                                                 | 0.9     | 1.6     |
| 130994_at   | Cluster Incl AW124327:UI-M-BH2.1-apq-e-10-0-UI.s1 Mus musculus cDNA, 3 end /clone=UI-M-BH2.1-apq-e-10-0-UI /clone_end=3 /gb=AW124327 /gi=6099857 /ug=Mm.28417 /len=239                                                     | 3       | 1.7     |
| 132361_at   | Cluster Incl AI642127:uc46b09.x1 Mus musculus cDNA, 3 end /clone=IMAGE-1401017 /clone_end=3 /gb=AI642127 /gi=4720602 /ug=Mm.45147 /len=618                                                                                 | 0.6     | 0.9     |
| 132794_at   | Cluster Incl AI593288:vu15g03.x1 Mus musculus cDNA, 3 end /clone=IMAGE-1180756 /clone_end=3 /gb=AI593288 /gi=4602336 /ug=Mm.80567 /len=461                                                                                 | 3.3     | 0.9     |
| 133037_at   | Cluster Incl AI196550:ui65c04.x1 Mus musculus cDNA, 3 end /clone=IMAGE-1887270 /clone_end=3 /gb=AI196550 /gi=3749156 /ug=Mm.17489 /len=457                                                                                 | 2.8     | 1.3     |
| 133830_at   | Cluster Incl AI428510:mo37e12.x1 Mus musculus cDNA, 3 end /clone=IMAGE-555790 /clone_end=3 /gb=AI428510 /gi=4274436 /ug=Mm.27109 /len=467                                                                                  | 0.6     | 1.1     |
| 134223_at   | Cluster Incl AI647230:vn60a10.y1 Mus musculus cDNA, 5 end /clone=IMAGE-1025562 /clone_end=5 /gb=AI647230 /gi=4725705 /ug=Mm.31085 /len=319                                                                                 | 2.5     | 3.3     |
| 134260_at   | Cluster Incl AI549876:vw97d02.x1 Mus musculus cDNA, 3 end /clone=IMAGE-1262883 /clone_end=3 /gb=AI549876 /gi=4482239 /ug=Mm.35154 /len=452                                                                                 | 2.8     | 2.7     |
| 134932_at   | Cluster Incl AI592958:vu88e03.x1 Mus musculus cDNA, 3 end /clone=IMAGE-1209244 /clone_end=3 /gb=AI592958 /gi=4602006 /ug=Mm.87358 /len=449                                                                                 | 0.5     | 0.5     |
| 135278_at   | Cluster Incl AI852823:UI-M-BH0-ajk-a-05-0-UI.s1 Mus musculus cDNA, 3 end /clone=UI-M-BH0-ajk-a-05-0-UI /clone_end=3 /gb=AI852823 /gi=5496729 /ug=Mm.39241 /len=433                                                         | 0.8     | 4       |
| 135760_at   | Cluster Incl AI852713:UI-M-BH0-aji-f-04-0-UI.s1 Mus musculus cDNA, 3 end /clone=UI-M-BH0-aji-f-04-0-UI /clone_end=3 /gb=AI852713 /gi=5496619 /ug=Mm.39664 /len=408                                                         | 1.2     | 2.1     |
| 136554_r_at | Cluster Incl AI505113:vq69b08.x1 Mus musculus cDNA, 3 end /clone=IMAGE-1107543 /clone_end=3 /gb=AI505113 /gi=4402964 /ug=Mm.35709 /len=165                                                                                 | 0.6     | 1.9     |
| 136630_i_at | Cluster Incl AI596386:vj55e07.x1 Mus musculus cDNA, 3 end /clone=IMAGE-932964 /clone_end=3 /gb=AI596386 /gi=4605434 /ug=Mm.36568 /len=226                                                                                  | 0.6     | 1.2     |
| 137047_at   | Cluster Incl AI607298:uc40a04.x1 Mus musculus cDNA, 3 end /clone=IMAGE-1400430 /clone_end=3 /gb=AI607298 /gi=4616465 /ug=Mm.37249 /len=532                                                                                 | 0.9     | 1.2     |
| 138408_at   | Cluster Incl AW124077:UI-M-BH2.1-apn-g-07-0-UI.s1 Mus musculus cDNA, 3 end /clone=UI-M-BH2.1-apn-g-07-0-UI /clone_end=3 /gb=AW124077 /gi=6099607 /ug=Mm.65393 /len=433                                                     | 1.6     | 3.1     |
| 139602_at   | Cluster Incl AI649058:uk34f12.x1 Mus musculus cDNA, 3 end /clone=IMAGE-1970927 /clone_end=3 /gb=AI649058 /gi=4729892 /ug=Mm.49585 /len=563                                                                                 | 0.7     | 1.9     |
| 140759_at   | Cluster Incl AI646554:vv55e10.x1 Mus musculus cDNA, 3 end /clone=IMAGE-1226346 /clone_end=3 /gb=AI646554 /gi=4725029 /ug=Mm.66314 /len=180                                                                                 | 0.7     | 1.4     |
| 141010_at   | Cluster Incl AI643790:vi45f06.x1 Mus musculus cDNA, 3 end /clone=IMAGE-906755 /clone_end=3 /gb=AI643790 /gi=4722265 /ug=Mm.74094 /len=156                                                                                  | -2.1    | -2      |
| 165460_at   | Cluster Incl AI853126:UI-M-BH0-ajf-e-12-0-UI.s1 Mus musculus cDNA, 3 end /clone=UI-M-BH0-ajf-e-12-0-UI /clone_end=3 /gb=AI853126 /gi=5497032 /ug=Mm.39303 /len=293 /NOTE=replacement for probe set(s) 132371_at on MG-U74C | 1.9     | 3.6     |
| 165637_i_at | Cluster Incl AI591601:vt45d09.x1 Mus musculus cDNA, 3 end /clone=IMAGE-1166033 /clone_end=3 /gb=AI591601 /gi=4600649 /ug=Mm.28769 /len=559 /NOTE=replacement for probe set(s) 130996_at on MG-                             | 4.6     | 4.4     |

|             | U74C                                                                                                                                                                                                                           |      |      |
|-------------|--------------------------------------------------------------------------------------------------------------------------------------------------------------------------------------------------------------------------------|------|------|
| 165641_at   | Cluster Incl AW122960:UI-M-BH2.1-aoz-g-01-0-UI.s2 Mus musculus cDNA, 3 end /clone=UI-M-BH2.1-aoz-g-01-0-UI /clone_end=3 /gb=AW122960 /gi=6098490 /ug=Mm.30820 /len=633 /NOTE=replacement for probe set(s) 131009_at on MG-U74C | 1.5  | 1.3  |
| 165935_at   | Cluster Incl AV062770:AV062770 Mus musculus cDNA /clone=2010004G12 /clone_end=3 /gb=AV062770 /gi=5182598 /ug=Mm.46323 /len=272 /NOTE=replacement for probe set(s) 130201_at on MG-U74C                                         | 2.4  | 1.1  |
| 165956_f_at | Cluster Incl AV076385:AV076385 Mus musculus cDNA /clone=2210017P08 /clone_end=3 /gb=AV076385 /gi=5196213 /ug=Mm.46390 /len=339 /NOTE=replacement for probe set(s) 130056_f_at on MG-U74C                                       | 4.4  | 0.8  |
| 166030_i_at | Cluster Incl AV269998:AV269998 Mus musculus cDNA, 3 end /clone=4930546J23 /clone_end=3 /gb=AV269998 /gi=6258035 /ug=Mm.50649 /len=231 /NOTE=replacement for probe set(s) 129811_f_at on MG-U74C                                | 2    | 5.3  |
| 166437_f_at | Cluster Incl AV318471:AV318471 Mus musculus cDNA, 3 end /clone=5932402C16 /clone_end=3 /gb=AV318471 /gi=6283888 /ug=Mm.94758 /len=302 /NOTE=replacement for probe set(s) 128806_at on MG-U74C                                  | 3.4  | 3.3  |
| 166740_at   | Cluster Incl AA624602:vn82g09.r1 Mus musculus cDNA, 5 end /clone=IMAGE-1038496 /clone_end=5 /gb=AA624602 /gi=2528478 /ug=Mm.34419 /len=334 /NOTE=replacement for probe set(s) 135689_at on MG-U74C                             | 0.5  | 3    |
| 167004_r_at | Cluster Incl AI558098:vw66d04.x1 Mus musculus cDNA, 3 end /clone=IMAGE-1259911 /clone_end=3 /gb=AI558098 /gi=4508336 /ug=Mm.45448 /len=395 /NOTE=replacement for probe set(s) 139756_f_at, 139757_r_at on MG-U74C              | 3.5  | 4    |
| 167216_f_at | Cluster Incl AV023830:AV023830 Mus musculus cDNA /clone=1190033O23 /clone_end=3 /gb=AV023830 /gi=4800822 /ug=Mm.46211 /len=273 /NOTE=replacement for probe set(s) 140252_f_at on MG-U74C                                       | 1.1  | 0.7  |
| 167237_f_at | Cluster Incl AV066368:AV066368 Mus musculus cDNA /clone=2010109A18 /clone_end=3 /gb=AV066368 /gi=5186196 /ug=Mm.46351 /len=291 /NOTE=replacement for probe set(s) 140274_f_at on MG-U74C                                       | 0.6  | 0.9  |
| 167608_f_at | Cluster Incl AV235587:AV235587 Mus musculus cDNA, 3 end /clone=4732405J01 /clone_end=3 /gb=AV235587 /gi=6188100 /ug=Mm.71217 /len=266 /NOTE=replacement for probe set(s) 140910_f_at on MG-U74C                                | 1.1  | 1.4  |
| 167758_at   | Cluster Incl AI644260:vv85d02.x1 Mus musculus cDNA, 3 end /clone=IMAGE-1229187 /clone_end=3 /gb=AI644260 /gi=4722735 /ug=Mm.77756 /len=289 /NOTE=replacement for probe set(s) 141178_at on MG-U74C                             | 0.5  | 0.7  |
| 167843_f_at | Cluster Incl AV321065:AV321065 Mus musculus cDNA, 3 end /clone=6030430K23 /clone_end=3 /gb=AV321065 /gi=6290898 /ug=Mm.80771 /len=244 /NOTE=replacement for probe set(s) 133069_f_at on MG-U74C                                | 0.5  | 0.6  |
| 167853_f_at | Cluster Incl AV062553:AV062553 Mus musculus cDNA /clone=2010003L07 /clone_end=3 /gb=AV062553 /gi=5182381 /ug=Mm.81318 /len=271 /NOTE=replacement for probe set(s) 133083_f_at on MG-U74C                                       | 0.6  | 0.8  |
| 168371_f_at | Cluster Incl AV254276:AV254276 Mus musculus cDNA, 3 end /clone=4921508O09 /clone_end=3 /gb=AV254276 /gi=6241735 /ug=Mm.89140 /len=212 /NOTE=replacement for probe set(s) 135345_f_at on MG-U74C                                | 0.6  | 0.8  |
| 168398_f_at | Cluster Incl AV266989:AV266989 Mus musculus cDNA, 3 end /clone=4930522F01 /clone_end=3 /gb=AV266989 /gi=6255026 /ug=Mm.91434 /len=204 /NOTE=replacement for probe set(s) 135420_f_at on MG-U74C                                | 1.2  | 1    |
| 168426_f_at | Cluster Incl AV376588:AV376588 Mus musculus cDNA, 3 end /clone=9130211I04 /clone_end=3 /gb=AV376588 /gi=6424235 /ug=Mm.94255 /len=243 /NOTE=replacement for probe set(s) 135466_f_at on MG-U74C                                | 2.7  | 3.6  |
| 168503_at   | Cluster Incl AV379925:AV379925 Mus musculus cDNA, 3 end /clone=9230016F10 /clone_end=3 /gb=AV379925 /gi=6428934 /ug=Mm.98504 /len=234 /NOTE=replacement for probe set(s) 135821_at on MG-U74C                                  | 4.6  | 2.7  |
| 168542_f_at | Cluster Incl AV357712:AV357712 Mus musculus cDNA, 3 end /clone=7420408E21 /clone_end=3 /gb=AV357712 /gi=6404714 /ug=Mm.99369 /len=246 /NOTE=replacement for probe set(s) 135880_f_at on MG-U74C                                | 2    | 2.8  |
| 170625_i_at | Cluster Incl AV309412:AV309412 Mus musculus cDNA, 3 end /clone=5730581I16 /clone_end=3 /gb=AV309412 /gi=6362447 /ug=Mm.95740 /len=342 /NOTE=replacement for probe set(s) 132247_at on MG-U74C                                  | 4.7  | 0.5  |
| 171194_at   | Cluster Incl AV122288:AV122288 Mus musculus cDNA /clone=2610524A15 /clone_end=3 /gb=AV122288 /gi=5308015 /ug=Mm.48061 /len=295 /NOTE=replacement for probe set(s) 139066_at on MG-U74C                                         | 1.4  | 3.5  |
| 130826_at   | Cluster Incl AU019726:AU019726 Mus musculus cDNA, 3 end /clone=J0521F07 /clone_end=3 /gb=AU019726 /gi=3375310 /ug=Mm.26180 /len=586                                                                                            | -3   | -4.1 |
| 131812_at   | Cluster Incl AW060633:UI-M-BH1-anq-h-06-0-UI.s1 Mus musculus cDNA, 3 end /clone=UI-M-BH1-anq-h-06-0-UI /clone_end=3 /gb=AW060633 /gi=6008384 /ug=Mm.76676 /len=431                                                             | -3.4 | -2.9 |
| 135746_at   | Cluster Incl AI850592:UI-M-BG1-aij-h-08-0-UI.s1 Mus musculus cDNA, 3 end /clone=UI-M-BG1-aij-h-08-0-UI /clone_end=3 /gb=AI850592 /gi=5494498 /ug=Mm.39635 /len=385                                                             | -3.8 | -0.9 |
| 104990_at   | Cluster Incl AA681392:vr41c07.s1 Mus musculus cDNA, 5 end /clone=IMAGE-1123212 /clone_end=5 /gb=AA681392 /gi=2663532 /ug=Mm.34340 /len=440                                                                                     | 1.1  | 0.7  |
| 105008_at   | Cluster Incl AI563638:vx97c09.x1 Mus musculus cDNA, 3 end /clone=IMAGE-1293904 /clone_end=3 /gb=AI563638 /gi=4522095 /ug=Mm.34550 /len=181                                                                                     | 1.3  | 3.2  |
| 105198_at   | Cluster Incl AA839576:vw97a03.r1 Mus musculus cDNA, 5 end /clone=IMAGE-1262860 /clone_end=5 /gb=AA839576 /gi=2915671 /ug=Mm.35591 /len=330                                                                                     | 1.6  | 1.5  |
| 105273_at   | Cluster Incl AI854883:UI-M-BH0-akb-f-10-0-UI.s1 Mus musculus cDNA, 3 end /clone=UI-M-BH0-akb-f-10-0-UI /clone_end=3 /gb=AI854883 /gi=5498789 /ug=Mm.36537 /len=461                                                             | 0.7  | 3.3  |
| 106064_at   | Cluster Incl AA920012:vz25b08.r1 Mus musculus cDNA, 5 end /clone=IMAGE-1327479 /clone_end=5 /gb=AA920012 /gi=3066791 /ug=Mm.22538 /len=387                                                                                     | 0.5  | 0.5  |
| 106196_at   | Cluster Incl AW060432:UI-M-BH1-anj-d-10-0-UI.s1 Mus musculus cDNA, 3 end /clone=UI-M-BH1-anj-d-10-0-UI /clone_end=3 /gb=AW060432 /gi=6008183 /ug=Mm.22817 /len=423                                                             | 0.5  | 1    |

|             |                                                                                                                                                                        |     |     |
|-------------|------------------------------------------------------------------------------------------------------------------------------------------------------------------------|-----|-----|
| 106204_at   | Cluster Incl AI957179:ul76e06.x1 Mus musculus cDNA, 3 end /clone=IMAGE-2136514 /clone_end=3 /gb=AI957179 /gi=5749888 /ug=Mm.22983 /len=536                             | 0.5 | 0.5 |
| 106292_at   | Cluster Incl AW123279:UI-M-BH2.1-apg-f-11-0-UI.s1 Mus musculus cDNA, 3 end /clone=UI-M-BH2.1-apg-f-11-0-UI /clone_end=3 /gb=AW123279 /gi=6098809 /ug=Mm.24020 /len=495 | 0.6 | 1.4 |
| 106294_at   | Cluster Incl AI834916:UI-M-AN1-afe-f-08-0-UI.s1 Mus musculus cDNA, 3 end /clone=UI-M-AN1-afe-f-08-0-UI /clone_end=3 /gb=AI834916 /gi=5469129 /ug=Mm.24036 /len=326     | 0.5 | 0.6 |
| 106475_at   | Cluster Incl AI852981:UI-M-BH0-aiz-h-11-0-UI.s1 Mus musculus cDNA, 3 end /clone=UI-M-BH0-aiz-h-11-0-UI /clone_end=3 /gb=AI852981 /gi=5496887 /ug=Mm.41855 /len=385     | 0.6 | 0.7 |
| 106577_at   | Cluster Incl AI849498:UI-M-AH1-agt-d-08-0-UI.s1 Mus musculus cDNA, 3 end /clone=UI-M-AH1-agt-d-08-0-UI /clone_end=3 /gb=AI849498 /gi=5493404 /ug=Mm.24329 /len=379     | 1.7 | 0.9 |
| 106615_at   | Cluster Incl AW208385:uo59g03.x1 Mus musculus cDNA, 3 end /clone=IMAGE-2646868 /clone_end=3 /gb=AW208385 /gi=6514379 /ug=Mm.24624 /len=587                             | 0.6 | 0.5 |
| 107154_f_at | Cluster Incl AW215571:up06a03.x1 Mus musculus cDNA, 3 end /clone=IMAGE-2651212 /clone_end=3 /gb=AW215571 /gi=6526247 /ug=Mm.89024 /len=333                             | 0.5 | 2.5 |
| 107491_at   | Cluster Incl AW048191:UI-M-BH1-amc-e-02-0-UI.s1 Mus musculus cDNA, 3 end /clone=UI-M-BH1-amc-e-02-0-UI /clone_end=3 /gb=AW048191 /gi=5908720 /ug=Mm.45111 /len=455     | 0.7 | 0.5 |
| 107498_at   | Cluster Incl AW047594:UI-M-BH1-akm-c-03-0-UI.s1 Mus musculus cDNA, 3 end /clone=UI-M-BH1-akm-c-03-0-UI /clone_end=3 /gb=AW047594 /gi=5908123 /ug=Mm.45131 /len=439     | 1   | 0.8 |
| 107621_at   | Cluster Incl AA815487:vp20b09.r1 Mus musculus cDNA, 5 end /clone=IMAGE-1069145 /clone_end=5 /gb=AA815487 /gi=2885083 /ug=Mm.27611 /len=389                             | 3.8 | 0.5 |
| 108022_at   | Cluster Incl AI845954:UI-M-AK1-aex-h-05-0-UI.s1 Mus musculus cDNA, 3 end /clone=UI-M-AK1-aex-h-05-0-UI /clone_end=3 /gb=AI845954 /gi=5489260 /ug=Mm.27820 /len=317     | 0.5 | 0.5 |
| 108076_at   | Cluster Incl AI836801:UI-M-AJ0-abc-h-05-0-UI.s1 Mus musculus cDNA, 3 end /clone=UI-M-AJ0-abc-h-05-0-UI /clone_end=3 /gb=AI836801 /gi=5471014 /ug=Mm.28162 /len=292     | 0.7 | 0.6 |
| 108516_at   | Cluster Incl AI851393:UI-M-BH0-akh-h-08-0-UI.s1 Mus musculus cDNA, 3 end /clone=UI-M-BH0-akh-h-08-0-UI /clone_end=3 /gb=AI851393 /gi=5495299 /ug=Mm.28435 /len=333     | 2.8 | 1   |
| 108780_at   | Cluster Incl AI845395:UI-M-AO1-aej-a-05-0-UI.s1 Mus musculus cDNA, 3 end /clone=UI-M-AO1-aej-a-05-0-UI /clone_end=3 /gb=AI845395 /gi=5489301 /ug=Mm.23265 /len=495     | 1   | 1.3 |
| 108784_at   | Cluster Incl AI427138:mn38e12.x1 Mus musculus cDNA, 3 end /clone=IMAGE-540238 /clone_end=3 /gb=AI427138 /gi=4273064 /ug=Mm.23282 /len=397                              | 0.9 | 0.6 |
| 108848_g_at | Cluster Incl AW261779:um92d07.x1 Mus musculus cDNA, 3 end /clone=IMAGE-2332237 /clone_end=3 /gb=AW261779 /gi=6638592 /ug=Mm.65980 /len=494                             | 0.5 | 0.6 |
| 109069_at   | Cluster Incl AI255982:ui76b01.x1 Mus musculus cDNA, 3 end /clone=IMAGE-1888297 /clone_end=3 /gb=AI255982 /gi=3863507 /ug=Mm.28756 /len=484                             | 0.8 | 0.8 |
| 109133_at   | Cluster Incl AW049475:UI-M-BH1-ams-f-06-0-UI.s1 Mus musculus cDNA, 3 end /clone=UI-M-BH1-ams-f-06-0-UI /clone_end=3 /gb=AW049475 /gi=5910004 /ug=Mm.28993 /len=222     | 0.7 | 0.6 |
| 109167_at   | Cluster Incl AI466033:vw35b01.y1 Mus musculus cDNA, 5 end /clone=IMAGE-1245769 /clone_end=5 /gb=AI466033 /gi=4320063 /ug=Mm.29148 /len=292                             | 0.8 | 0.5 |
| 109332_at   | Cluster Incl AW046226:UI-M-BH1-ala-a-07-0-UI.s1 Mus musculus cDNA, 3 end /clone=UI-M-BH1-ala-a-07-0-UI /clone_end=3 /gb=AW046226 /gi=5906755 /ug=Mm.23805 /len=430     | 0.5 | 0.8 |
| 109622_at   | Cluster Incl AI594717:vv12g06.x1 Mus musculus cDNA, 3 end /clone=IMAGE-1211482 /clone_end=3 /gb=AI594717 /gi=4603765 /ug=Mm.62046 /len=446                             | 0.5 | 0.7 |
| 110008_at   | Cluster Incl AW124842:UI-M-BH2.1-apk-f-09-0-UI.s1 Mus musculus cDNA, 3 end /clone=UI-M-BH2.1-apk-f-09-0-UI /clone_end=3 /gb=AW124842 /gi=6100372 /ug=Mm.25025 /len=506 | 0.5 | 0.6 |
| 110309_at   | Cluster Incl AW121524:UI-M-BH2.2-aop-c-10-0-UI.s1 Mus musculus cDNA, 3 end /clone=UI-M-BH2.2-aop-c-10-0-UI /clone_end=3 /gb=AW121524 /gi=6096857 /ug=Mm.30208 /len=546 | 1.1 | 1.1 |
| 110446_at   | Cluster Incl AA684172:vm68b07.s1 Mus musculus cDNA, 5 end /clone=IMAGE-1003381 /clone_end=5 /gb=AA684172 /gi=2670758 /ug=Mm.25725 /len=290                             | 0.5 | 3.6 |
| 110467_at   | Cluster Incl AI120654:ub71b06.r1 Mus musculus cDNA, 5 end /clone=IMAGE-1383155 /clone_end=5 /gb=AI120654 /gi=3520978 /ug=Mm.25851 /len=487                             | 0.8 | 0.5 |
| 110503_at   | Cluster Incl AI481152:vg87a11.x1 Mus musculus cDNA, 3 end /clone=IMAGE-872924 /clone_end=3 /gb=AI481152 /gi=4374378 /ug=Mm.26159 /len=401                              | 0.5 | 0.9 |
| 111347_at   | Cluster Incl AI842321:UI-M-AM1-afz-b-04-0-UI.s1 Mus musculus cDNA, 3 end /clone=UI-M-AM1-afz-b-04-0-UI /clone_end=3 /gb=AI842321 /gi=5476499 /ug=Mm.34081 /len=361     | 1.7 | 0.9 |
| 111359_at   | Cluster Incl AW108291:um20f02.x1 Mus musculus cDNA, 3 end /clone=IMAGE-2192859 /clone_end=3 /gb=AW108291 /gi=6079091 /ug=Mm.34119 /len=534                             | 2.3 | 2.3 |
| 111494_at   | Cluster Incl AI553403:vw52e01.x1 Mus musculus cDNA, 3 end /clone=IMAGE-1247448 /clone_end=3 /gb=AI553403 /gi=4485766 /ug=Mm.27419 /len=416                             | 0.6 | 0.6 |
| 111529_at   | Cluster Incl AW048558:UI-M-BH1-alk-e-01-0-UI.s1 Mus musculus cDNA, 3 end /clone=UI-M-BH1-alk-e-01-0-UI /clone_end=3 /gb=AW048558 /gi=5909087 /ug=Mm.27612 /len=396     | 1.1 | 0.7 |
| 112209_at   | Cluster Incl AW122818:UI-M-BH2.1-aoz-b-10-0-UI.s1 Mus musculus cDNA, 3 end /clone=UI-M-BH2.1-aoz-b-10-0-UI /clone_end=3 /gb=AW122818 /gi=6098348 /ug=Mm.87253 /len=318 | 2.2 | 2.9 |
| 112373_at   | Cluster Incl AI840826:UI-M-AH0-adb-d-06-0-UI.s1 Mus musculus cDNA, 3 end /clone=UI-M-AH0-adb-d-06-0-UI /clone_end=3 /gb=AI840826 /gi=5475039 /ug=Mm.38488 /len=363     | 0.6 | 0.7 |
| 112392_at   | Cluster Incl AI834768:UI-M-AM0-ads-b-05-0-UI.s1 Mus musculus cDNA, 3 end /clone=UI-M-AM0-ads-b-05-0-UI /clone_end=3 /gb=AI834768 /gi=5469001 /ug=Mm.38806 /len=320     | 0.7 | 3.7 |
| 112400_at   | Cluster Incl AW060912:UI-M-BH1-anv-c-03-0-UI.s1 Mus musculus cDNA, 3 end /clone=UI-M-BH1-anv-c-03-0-UI /clone_end=3 /gb=AW060912 /gi=6008663 /ug=Mm.28607 /len=477     | 0.7 | 0.6 |
| 112405_at   | Cluster Incl AI557974:vw69e08.x1 Mus musculus cDNA, 3 end /clone=IMAGE-1260230 /clone_end=3 /gb=AI557974 /gi=4508212 /ug=Mm.28632 /len=284                             | 0.7 | 0.5 |
| 112445_at   | Cluster Incl AI156718:ue53g05.r1 Mus musculus cDNA, 5 end /clone=IMAGE-1494872 /clone_end=5 /gb=AI156718 /gi=3685187 /ug=Mm.28937 /len=316                             | 1.2 | 0.8 |



|             |                                                                                                                                                                                                                                |     |     |
|-------------|--------------------------------------------------------------------------------------------------------------------------------------------------------------------------------------------------------------------------------|-----|-----|
| 112828_at   | Cluster Incl AW121214:UI-M-BH2.3-aok-d-07-0-UI.s1 Mus musculus cDNA, 3 end /clone=UI-M-BH2.3-aok-d-07-0-UI /clone_end=3 /gb=AW121214 /gi=6096547 /ug=Mm.41032 /len=478                                                         | 0.6 | 0.6 |
| 112922_i_at | Cluster Incl AI173274:ue90g08.x1 Mus musculus cDNA, 3 end /clone=IMAGE-1498430 /clone_end=3 /gb=AI173274 /gi=3720854 /ug=Mm.29644 /len=509                                                                                     | 0.8 | 1.4 |
| 112955_at   | Cluster Incl AW122703:UI-M-BH2.2-aot-c-01-0-UI.s1 Mus musculus cDNA, 3 end /clone=UI-M-BH2.2-aot-c-01-0-UI /clone_end=3 /gb=AW122703 /gi=6098233 /ug=Mm.29888 /len=466                                                         | 0.9 | 0.7 |
| 113036_at   | Cluster Incl AW120709:UI-M-BH2.3-anz-e-08-0-UI.s1 Mus musculus cDNA, 3 end /clone=UI-M-BH2.3-anz-e-08-0-UI /clone_end=3 /gb=AW120709 /gi=6096007 /ug=Mm.9868 /len=432                                                          | 0.9 | 0.7 |
| 113265_at   | Cluster Incl AA840143:ud01f02.r1 Mus musculus cDNA, 5 end /clone=IMAGE-1433883 /clone_end=5 /gb=AA840143 /gi=2915852 /ug=Mm.30607 /len=394                                                                                     | 0.5 | 3.8 |
| 113314_at   | Cluster Incl AI840767:UI-M-AM0-adn-f-04-0-UI.s1 Mus musculus cDNA, 3 end /clone=UI-M-AM0-adn-f-04-0-UI /clone_end=3 /gb=AI840767 /gi=5474980 /ug=Mm.30794 /len=399                                                             | 1   | 4.3 |
| 113431_at   | Cluster Incl AI121269:ue90f05.y1 Mus musculus cDNA, 5 end /clone=IMAGE-1498401 /clone_end=5 /gb=AI121269 /gi=3521593 /ug=Mm.11226 /len=550                                                                                     | 3   | 3.7 |
| 114032_f_at | Cluster Incl AI843759:UI-M-AN1-afc-b-03-0-UI.s1 Mus musculus cDNA, 3 end /clone=UI-M-AN1-afc-b-03-0-UI /clone_end=3 /gb=AI843759 /gi=5477972 /ug=Mm.31827 /len=453                                                             | 0.7 | 3.6 |
| 114629_at   | Cluster Incl AW124408:UI-M-BH2.1-ape-d-11-0-UI.s1 Mus musculus cDNA, 3 end /clone=UI-M-BH2.1-ape-d-11-0-UI /clone_end=3 /gb=AW124408 /gi=6099938 /ug=Mm.85814 /len=212                                                         | 0.5 | 0.6 |
| 114749_at   | Cluster Incl AW107659:um22d07.x1 Mus musculus cDNA, 3 end /clone=IMAGE-2225293 /clone_end=3 /gb=AW107659 /gi=6078459 /ug=Mm.33503 /len=593                                                                                     | 0.5 | 0.8 |
| 114845_s_at | Cluster Incl AI449745:mr67e01.x1 Mus musculus cDNA, 3 end /clone=IMAGE-602520 /clone_end=3 /gb=AI449745 /gi=4292152 /ug=Mm.34037 /len=482                                                                                      | 1.1 | 1   |
| 115010_at   | Cluster Incl AI848157:UI-M-AH1-agq-b-08-0-UI.s1 Mus musculus cDNA, 3 end /clone=UI-M-AH1-agq-b-08-0-UI /clone_end=3 /gb=AI848157 /gi=5492063 /ug=Mm.11186 /len=446                                                             | 0.9 | 1.1 |
| 115062_at   | Cluster Incl AW122118:UI-M-BH2.2-aor-b-06-0-UI.s1 Mus musculus cDNA, 3 end /clone=UI-M-BH2.2-aor-b-06-0-UI /clone_end=3 /gb=AW122118 /gi=6097537 /ug=Mm.12730 /len=391                                                         | 0.5 | 1.2 |
| 115066_at   | Cluster Incl AI550177:mn21c02.y1 Mus musculus cDNA, 5 end /clone=IMAGE-538562 /clone_end=5 /gb=AI550177 /gi=4482540 /ug=Mm.12902 /len=588                                                                                      | 1.1 | 0.6 |
| 115112_at   | Cluster Incl AW050362:UI-M-BH1-ang-e-10-0-UI.s1 Mus musculus cDNA, 3 end /clone=UI-M-BH1-ang-e-10-0-UI /clone_end=3 /gb=AW050362 /gi=5910891 /ug=Mm.34129 /len=515                                                             | 1.3 | 3.3 |
| 115347_at   | Cluster Incl AI639571:vv48b08.x1 Mus musculus cDNA, 3 end /clone=IMAGE-1225623 /clone_end=3 /gb=AI639571 /gi=4702680 /ug=Mm.17643 /len=360                                                                                     | 0.7 | 0.5 |
| 115752_at   | Cluster Incl AI837128:UI-M-AK0-adc-f-10-0-UI.s1 Mus musculus cDNA, 3 end /clone=UI-M-AK0-adc-f-10-0-UI /clone_end=3 /gb=AI837128 /gi=5471341 /ug=Mm.20703 /len=332                                                             | 0.6 | 0.5 |
| 115792_at   | Cluster Incl AI510157:vy01c05.y1 Mus musculus cDNA, 5 end /clone=IMAGE-1294184 /clone_end=5 /gb=AI510157 /gi=4409062 /ug=Mm.21630 /len=271                                                                                     | 0.6 | 0.8 |
| 115820_at   | Cluster Incl AI852255:UI-M-BH0-aje-a-09-0-UI.s1 Mus musculus cDNA, 3 end /clone=UI-M-BH0-aje-a-09-0-UI /clone_end=3 /gb=AI852255 /gi=5496161 /ug=Mm.34977 /len=365                                                             | 0.8 | 0.6 |
| 116003_at   | Cluster Incl AI594591:vo08f12.y1 Mus musculus cDNA, 5 end /clone=IMAGE-1040879 /clone_end=5 /gb=AI594591 /gi=4603639 /ug=Mm.31072 /len=409                                                                                     | 0.5 | 0.9 |
| 116312_at   | Cluster Incl AW214291:uo45h06.x2 Mus musculus cDNA, 3 end /clone=IMAGE-2645531 /clone_end=3 /gb=AW214291 /gi=6520777 /ug=Mm.22496 /len=297                                                                                     | 0.6 | 0.5 |
| 116418_at   | Cluster Incl AA839780:vw51e12.r1 Mus musculus cDNA, 5 end /clone=IMAGE-1247374 /clone_end=5 /gb=AA839780 /gi=2916374 /ug=Mm.37829 /len=439                                                                                     | 0.5 | 0.5 |
| 116635_at   | Cluster Incl AW061144:UI-M-BH1-anc-a-09-0-UI.s1 Mus musculus cDNA, 3 end /clone=UI-M-BH1-anc-a-09-0-UI /clone_end=3 /gb=AW061144 /gi=6008895 /ug=Mm.38313 /len=459                                                             | 0.8 | 0.8 |
| 116837_at   | Cluster Incl AI839054:UI-M-AK0-adi-b-04-0-UI.s1 Mus musculus cDNA, 3 end /clone=UI-M-AK0-adi-b-04-0-UI /clone_end=3 /gb=AI839054 /gi=5473262 /ug=Mm.38847 /len=413                                                             | 0.5 | 1.2 |
| 162562_at   | Cluster Incl AI840292:UI-M-AH0-act-h-04-0-UI.s1 Mus musculus cDNA, 3 end /clone=UI-M-AH0-act-h-04-0-UI /clone_end=3 /gb=AI840292 /gi=5474505 /ug=Mm.18818 /len=359 /NOTE=replacement for probe set(s) 106038_at on MG-U74B     | 0.5 | 0.8 |
| 162607_i_at | Cluster Incl AA655098:vg83g07.s1 Mus musculus cDNA, 5 end /clone=IMAGE-1108956 /clone_end=5 /gb=AA655098 /gi=2591252 /ug=Mm.24146 /len=344 /NOTE=replacement for probe set(s) 106307_r_at on MG-U74B                           | 1.1 | 0.6 |
| 162690_at   | Cluster Incl AW045453:UI-M-BH1-akr-h-02-0-UI.s1 Mus musculus cDNA, 3 end /clone=UI-M-BH1-akr-h-02-0-UI /clone_end=3 /gb=AW045453 /gi=5906022 /ug=Mm.27628 /len=326 /NOTE=replacement for probe set(s) 107625_at on MG-U74B     | 0.9 | 0.7 |
| 162704_i_at | Cluster Incl AW121177:UI-M-BH2.3-aok-a-04-0-UI.s1 Mus musculus cDNA, 3 end /clone=UI-M-BH2.3-aok-a-04-0-UI /clone_end=3 /gb=AW121177 /gi=6096510 /ug=Mm.28122 /len=448 /NOTE=replacement for probe set(s) 108063_at on MG-U74B | 0.6 | 0.9 |
| 162728_at   | Cluster Incl AI854587:UI-M-BH0-ake-b-01-0-UI.s1 Mus musculus cDNA, 3 end /clone=UI-M-BH0-ake-b-01-0-UI /clone_end=3 /gb=AI854587 /gi=5498493 /ug=Mm.28456 /len=464 /NOTE=replacement for probe set(s) 108522_at on MG-U74B     | 1.7 | 1.3 |
| 162843_at   | Cluster Incl AW124799:UI-M-BH2.1-apk-a-09-0-UI.s1 Mus musculus cDNA, 3 end /clone=UI-M-BH2.1-apk-a-09-0-UI /clone_end=3 /gb=AW124799 /gi=6100329 /ug=Mm.34012 /len=438 /NOTE=replacement for probe set(s) 111330_at on MG-U74B | 0.5 | 0.5 |
| 162869_at   | Cluster Incl AI849131:UI-M-AJ1-agy-b-03-0-UI.s1 Mus musculus cDNA, 3 end /clone=UI-M-AJ1-agy-b-03-0-UI /clone_end=3 /gb=AI849131 /gi=5493037 /ug=Mm.34614 /len=393 /NOTE=replacement for probe set(s) 111803_at on MG-U74B     | 3   | 1   |
| 162929_at   | Cluster Incl AI843261:UI-M-AO1-aei-b-11-0-UI.s1 Mus musculus cDNA, 3 end /clone=UI-M-AO1-aei-b-11-0-UI /clone_end=3 /gb=AI843261 /gi=5477474 /ug=Mm.39487 /len=331 /NOTE=replacement for probe set(s) 112789_at on MG-U74B     | 1.2 | 0.6 |
| 163015_at   | Cluster Incl AA929443:vt30f05.r1 Mus musculus cDNA, 5 end /clone=IMAGE-1164609 /clone_end=5 /gb AA929443 /gi 3078752 / g Mm 45844 /len 342 /NOTE replacement for probe set(s) 113929_at on MG                                  | 0.8 | 0.8 |

|             |                                                                                                                                                                                                                            |      |      |
|-------------|----------------------------------------------------------------------------------------------------------------------------------------------------------------------------------------------------------------------------|------|------|
|             | /gb=AA929443 /gi=3078752 /ug=Mm.45844 /len=342 /NOTE=replacement for probe set(s) 113929_at on MG-U74B                                                                                                                     |      |      |
| 163262_at   | Cluster Incl AI316329:uj99c11.y1 Mus musculus cDNA, 5 end /clone=IMAGE-1958036 /clone_end=5 /gb=AI316329 /gi=4031596 /ug=Mm.26162 /len=469 /NOTE=replacement for probe set(s) 110959_at on MG-U74B                         | 0.5  | 0.5  |
| 163489_at   | Cluster Incl AI536506:vp05h01.y1 Mus musculus cDNA, 5 end /clone=IMAGE-1067761 /clone_end=5 /gb=AI536506 /gi=4450641 /ug=Mm.35290 /len=457 /NOTE=replacement for probe set(s) 115868_at on MG-U74B                         | 1    | 0.7  |
| 163626_at   | Cluster Incl AI845529:UI-M-AO1-aek-e-08-0-UI.s1 Mus musculus cDNA, 3 end /clone=UI-M-AO1-aek-e-08-0-UI /clone_end=3 /gb=AI845529 /gi=5489435 /ug=Mm.41519 /len=292 /NOTE=replacement for probe set(s) 117268_at on MG-U74B | 0.5  | 1.1  |
| 164028_at   | Cluster Incl AI550146:mn15e06.y1 Mus musculus cDNA, 5 end /clone=IMAGE-538018 /clone_end=5 /gb=AI550146 /gi=4482509 /ug=Mm.89772 /len=435 /NOTE=replacement for probe set(s) 112717_at on MG-U74B                          | 0.7  | 0.6  |
| 164330_f_at | Cluster Incl AV246750:AV246750 Mus musculus cDNA, 3 end /clone=4832417M20 /clone_end=3 /gb=AV246750 /gi=6234209 /ug=Mm.55261 /len=255 /NOTE=replacement for probe set(s) 112527_f_at on MG-U74B                            | 0.5  | 0.6  |
| 164467_f_at | Cluster Incl AV214487:AV214487 Mus musculus cDNA, 3 end /clone=2410136N07 /clone_end=3 /gb=AV214487 /gi=6155333 /ug=Mm.59365 /len=212 /NOTE=replacement for probe set(s) 113390_f_at on MG-U74B                            | 1.8  | 0.8  |
| 164545_f_at | Cluster Incl AV296659:AV296659 Mus musculus cDNA, 3 end /clone=5730442M11 /clone_end=3 /gb=AV296659 /gi=6328678 /ug=Mm.62763 /len=283 /NOTE=replacement for probe set(s) 106367_f_at on MG-U74B                            | 1    | 0.9  |
| 165359_f_at | Cluster Incl AV028174:AV028174 Mus musculus cDNA /clone=1300018H13 /clone_end=3 /gb=AV028174 /gi=4807784 /ug=Mm.52431 /len=261 /NOTE=replacement for probe set(s) 110910_f_at on MG-U74B                                   | 1    | 1    |
| 106125_at   | Cluster Incl AI847472:UI-M-AI1-afs-e-09-0-UI.s1 Mus musculus cDNA, 3 end /clone=UI-M-AI1-afs-e-09-0-UI /clone_end=3 /gb=AI847472 /gi=5491378 /ug=Mm.41027 /len=481                                                         | -2.1 | -0.7 |
| 106222_at   | Cluster Incl AW050335:UI-M-BH1-ang-c-02-0-UI.s1 Mus musculus cDNA, 3 end /clone=UI-M-BH1-ang-c-02-0-UI /clone_end=3 /gb=AW050335 /gi=5910864 /ug=Mm.23314 /len=501                                                         | -0.8 | -1   |
| 106927_at   | Cluster Incl AI882582:ub98b11.r1 Mus musculus cDNA, 5 end /clone=IMAGE-1396509 /clone_end=5 /gb=AI882582 /gi=5567671 /ug=Mm.41857 /len=414                                                                                 | -1.5 | -1.4 |
| 108488_at   | Cluster Incl AI838112:UI-M-AL0-abw-a-05-0-UI.s1 Mus musculus cDNA, 3 end /clone=UI-M-AL0-abw-a-05-0-UI /clone_end=3 /gb=AI838112 /gi=5472325 /ug=Mm.28315 /len=491                                                         | -1.4 | -1.5 |
| 108614_f_at | Cluster Incl AI845104:UI-M-BG0-ahs-a-02-0-UI.s1 Mus musculus cDNA, 3 end /clone=UI-M-BG0-ahs-a-02-0-UI /clone_end=3 /gb=AI845104 /gi=5489010 /ug=Mm.95694 /len=152                                                         | -1.1 | -1   |
| 109689_at   | Cluster Incl AI115717:uc34e06.r1 Mus musculus cDNA, 5 end /clone=IMAGE-1399906 /clone_end=5 /gb=AI115717 /gi=3516041 /ug=Mm.29368 /len=366                                                                                 | -0.6 | -0.7 |
| 109748_at   | Cluster Incl AI852387:UI-M-BH0-aip-b-07-0-UI.s1 Mus musculus cDNA, 3 end /clone=UI-M-BH0-aip-b-07-0-UI /clone_end=3 /gb=AI852387 /gi=5496333 /ug=Mm.29635 /len=378                                                         | -3.7 | -1.8 |
| 110311_at   | Cluster Incl AW121466:UI-M-BH2.2-aon-f-08-0-UI.s1 Mus musculus cDNA, 3 end /clone=UI-M-BH2.2-aon-f-08-0-UI /clone_end=3 /gb=AW121466 /gi=6096799 /ug=Mm.30219 /len=224                                                     | -2   | -1.3 |
| 110859_at   | Cluster Incl AI851594:UI-M-BH0-aki-h-07-0-UI.s1 Mus musculus cDNA, 3 end /clone=UI-M-BH0-aki-h-07-0-UI /clone_end=3 /gb=AI851594 /gi=5495500 /ug=Mm.33881 /len=531                                                         | -1.5 | -0.7 |
| 113567_at   | Cluster Incl AI848066:UI-M-AP1-agk-a-08-0-UI.s1 Mus musculus cDNA, 3 end /clone=UI-M-AP1-agk-a-08-0-UI /clone_end=3 /gb=AI848066 /gi=5491972 /ug=Mm.41925 /len=320                                                         | -0.6 | -1.2 |
| 114959_at   | Cluster Incl AI316880:ui35d02.y1 Mus musculus cDNA, 5 end /clone=IMAGE-1853283 /clone_end=5 /gb=AI316880 /gi=4032147 /ug=Mm.26923 /len=559                                                                                 | -5   | -4.8 |
| 116273_at   | Cluster Incl AW123862:UI-M-BH2.1-app-c-06-0-UI.s1 Mus musculus cDNA, 3 end /clone=UI-M-BH2.1-app-c-06-0-UI /clone_end=3 /gb=AW123862 /gi=6099392 /ug=Mm.31953 /len=451                                                     | -2.1 | -1.7 |
| 116917_at   | Cluster Incl AI843367:UI-M-AQ1-adz-e-01-0-UI.s1 Mus musculus cDNA, 3 end /clone=UI-M-AQ1-adz-e-01-0-UI /clone_end=3 /gb=AI843367 /gi=5477580 /ug=Mm.39738 /len=320                                                         | -1.4 | -0.7 |
| 162552_at   | Cluster Incl AI838713:UI-M-AO0-acf-a-07-0-UI.s1 Mus musculus cDNA, 3 end /clone=UI-M-AO0-acf-a-07-0-UI /clone_end=3 /gb=AI838713 /gi=5472926 /ug=Mm.12715 /len=251 /NOTE=replacement for probe set(s) 106021_at on MG-U74B | -0.5 | -0.6 |
| 163495_at   | Cluster Incl AA867621:vx12b01.r1 Mus musculus cDNA, 5 end /clone=IMAGE-1264201 /clone_end=5 /gb=AA867621 /gi=2963066 /ug=Mm.35584 /len=381 /NOTE=replacement for probe set(s) 115905_at on MG-U74B                         | -2.7 | -3.3 |
| 163539_at   | Cluster Incl AA790688:vw18d01.r1 Mus musculus cDNA, 5 end /clone=IMAGE-1244161 /clone_end=5 /gb=AA790688 /gi=2850808 /ug=Mm.38269 /len=145 /NOTE=replacement for probe set(s) 116622_at on MG-U74B                         | -1   | -1.3 |
| 163658_at   | Cluster Incl AI851180:UI-M-BH0-akg-g-11-0-UI.s1 Mus musculus cDNA, 3 end /clone=UI-M-BH0-akg-g-11-0-UI /clone_end=3 /gb=AI851180 /gi=5495051 /ug=Mm.44182 /len=483 /NOTE=replacement for probe set(s) 106994_at on MG-U74B | -1.4 | -0.6 |
| 163796_at   | Cluster Incl AI115603:uh87f01.r1 Mus musculus cDNA, 5 end /clone=IMAGE-1764697 /clone_end=5 /gb=AI115603 /gi=3515927 /ug=Mm.46662 /len=368 /NOTE=replacement for probe set(s) 108978_at on MG-U74B                         | -0.6 | -0.8 |
| 163901_at   | Cluster Incl AV229258:AV229258 Mus musculus cDNA, 3 end /clone=4631405N17 /clone_end=3 /gb=AV229258 /gi=6181774 /ug=Mm.73467 /len=245 /NOTE=replacement for probe set(s) 110244_at on MG-U74B                              | -1.6 | -1.5 |
| 163902_at   | Cluster Incl W84234:mf36f06.r1 Mus musculus cDNA, 5 end /clone=IMAGE-407171 /clone_end=5 /gb=W84234 /gi=1541218 /ug=Mm.73487 /len=486 /NOTE=replacement for probe set(s) 110245_at on MG-U74B                              | -0.7 | -0.7 |
| 164204_at   | Cluster Incl AI645728:vr78e08.x1 Mus musculus cDNA, 3 end /clone=IMAGE-1134854 /clone_end=3 /gb=AI645728 /gi=4724203 /ug=Mm.64913 /len=406 /NOTE=replacement for probe set(s) 108343_at on MG-                             | -1.7 | -1.2 |

|             | U74B                                                                                                                                                                                               |      |      |
|-------------|----------------------------------------------------------------------------------------------------------------------------------------------------------------------------------------------------|------|------|
| 164692_i_at | Cluster Incl AV343909:AV343909 Mus musculus cDNA, 3 end /clone=6430540I04 /clone_end=3<br>/gb=AV343909 /gi=6384968 /ug=Mm.68548 /len=235 /NOTE=replacement for probe set(s) 106774_r_at on MG-U74B | -0.7 | -2.6 |
| 165336_f_at | Cluster Incl AV324794:AV324794 Mus musculus cDNA, 3 end /clone=6230427O21 /clone_end=3<br>/gb=AV324794 /gi=6294711 /ug=Mm.51343 /len=226 /NOTE=replacement for probe set(s) 110886_at on MG-U74B   | -1.6 | -2.6 |

Shown are the probe identification, sequence description and signal  $\log_2$  ratio for both comparisons.

---
