# Supplementary material for: Dissecting Wnt/β-catenin signaling during gastrulation using RNA interference in mouse embryos
Source: Oxford University Press journal article supplement (doi:10.1242/dev.01842), 2005-04-28
Supplement: dev01842supptable2.pdf [file dev01842supptable2.pdf]

**Table S2. Comparison of expression profiles for homozygous null and conditional  $\beta$ -catenin mutants**

| AffymetrixID | Symbol        | $\beta$ -cat 6.0 | $\beta$ -cat 6.5 | CKO-wt | CKO-het |
|--------------|---------------|------------------|------------------|--------|---------|
| 94200_at     | Gbx2          | 1                | 0                | -5.4   | -4.4    |
| 94200_at     | Gbx2          | -1.6             | -2               | -5.4   | -4.4    |
| 95297_at     | Hoxa1         | -1.2             | 1.3              | -5.1   | -4.5    |
| 114959_at    | C030045D06Rik |                  |                  | -5     | -4.8    |
| 103477_at    | Cdx1          | 1.3              | -1               | -4.2   | -4.9    |
| 103477_at    | Cdx1          | 1.2              | 1                | -4.2   | -4.9    |
| 135746_at    | ---           |                  |                  | -3.8   | -0.9    |
| 109748_at    | 5430401D19Rik |                  |                  | -3.7   | -1.8    |
| 131812_at    | Atp8a2        |                  |                  | -3.4   | -2.9    |
| 98028_at     | Twist1        | -1.2             | 1.8              | -3.2   | -3.6    |
| 130826_at    | ---           |                  |                  | -3     | -4.1    |
| 102667_at    | Wnt3a         | 1.1              | -1.2             | -2.9   | -3.2    |
| 102755_at    | Itln          |                  |                  | -2.8   | -2.8    |
| 163495_at    | Skp2          |                  |                  | -2.7   | -3.3    |
| 99361_at     | Wnt8a         | 1                | -1               | -2.4   | -3      |
| 116273_at    | ---           |                  |                  | -2.1   | -1.7    |
| 106125_at    | 2610024A01Rik |                  |                  | -2.1   | -0.7    |
| 141010_at    | Nkx1-2        |                  |                  | -2.1   | -2      |
| 92931_at     | Dll1          | 1.4              | -3               | -2     | -1.5    |
| 110311_at    | Nkd1          |                  |                  | -2     | -1.3    |
| 103460_at    | 5830413E08Rik | -1.1             | 1.1              | -1.9   | -1.5    |
| 164204_at    | A1427833      |                  |                  | -1.7   | -1.2    |
| 93888_at     | Hoxb1         | 2.1              | 1.2              | -1.7   | -1.8    |
| 93888_at     | Hoxb1         | 2.3              | -1.8             | -1.7   | -1.8    |
| 165336_f_at  | ---           |                  |                  | -1.6   | -2.6    |
| 163901_at    | 6030401B09Rik |                  |                  | -1.6   | -1.5    |
| 160254_at    | Mil2-pending  |                  |                  | -1.6   | -1.7    |
| 93611_at     | Tbx6          | 1.2              | 1.1              | -1.6   | -1.8    |
| 99390_at     | Wnt5a         | 1                | -1.2             | -1.6   | -1.8    |
| 97386_at     | 1110032O19Rik | -1.4             | -1.6             | -1.5   | -1.6    |
| 110859_at    | 1300010M03Rik |                  |                  | -1.5   | -0.7    |
| 98108_at     | Crabp1        | -1.5             | -2.6             | -1.5   | -1.3    |
| 98108_at     | Crabp1        | 1.6              | 1                | -1.5   | -1.3    |
| 98108_at     | Crabp1        | 1.2              | 1.8              | -1.5   | -1.3    |
| 106927_at    | Hoxb2         |                  |                  | -1.5   | -1.4    |
| 163658_at    | 6430704M03Rik |                  |                  | -1.4   | -0.6    |
| 116917_at    | LOC279653     |                  |                  | -1.4   | -0.7    |
| 108488_at    | Smardc3       |                  |                  | -1.4   | -1.5    |
| 93941_at     | T             | -2.5             | -4.6             | -1.4   | -1.4    |
| 98427_s_at   | Nfkb1         | 1.1              | 0                | -1.3   | -1.1    |
| 97497_at     | Notch1        | -1.9             | 1.4              | -1.3   | -0.8    |
| 97497_at     | Notch1        | 1                | -1.1             | -1.3   | -0.8    |
| 97497_at     | Notch1        | 1.4              | -1.4             | -1.3   | -0.8    |
| 97497_at     | Notch1        | -1.1             | 1.3              | -1.3   | -0.8    |
| 97497_at     | Notch1        | -1.5             | 1.1              | -1.3   | -0.8    |
| 99086_g_at   | Usp3          |                  |                  | -1.3   | -0.9    |
| 98831_at     | Foxj1         | 1.2              | -1.2             | -1.2   | -1      |
| 94117_f_at   | Punc          |                  |                  | -1.2   | -1.2    |
| 108614_f_at  | 1110012O05Rik |                  |                  | -1.1   | -1      |

|             |               |      |      |      |      |
|-------------|---------------|------|------|------|------|
| 104672_at   | Frzb          | 1.7  | -4.3 | -1.1 | -1   |
| 163539_at   | ---           |      |      | -1   | -1.3 |
| 94813_at    | Gas1          | 1.3  | -1.2 | -1   | -1.4 |
| 99034_at    | Irx3          |      |      | -1   | -0.9 |
| 98419_at    | Meox1         | 1.1  | 1.3  | -1   | -0.7 |
| 104716_at   | Rbp1          | 1.3  | 1.2  | -1   | -1   |
| 97977_at    | BC019633      | -1.1 | -1.9 | -0.9 | -0.9 |
| 104548_at   | Phlda2        | -2.1 | -1.4 | -0.9 | -0.8 |
| 166567_f_at | 2900027G03Rik |      |      | -0.8 | -0.7 |
| 106222_at   | AI447312      |      |      | -0.8 | -1   |
| 100127_at   | Crabp2        | 1.5  | 2.8  | -0.8 | -0.8 |
| 96684_at    | Grsf1         | 1.1  | -1.2 | -0.8 | -0.7 |
| 100403_at   | My17          | 3.2  | 1.3  | -0.8 | -0.7 |
| 100403_at   | My17          | 1.5  | -1.1 | -0.8 | -0.7 |
| 92997_g_at  | Sox17         | -1   | -2.2 | -0.8 | -0.7 |
| 98330_at    | Zic3          | -1   | -1.2 | -0.8 | -0.7 |
| 98330_at    | Zic3          | -1.2 | -1.2 | -0.8 | -0.7 |
| 98330_at    | Zic3          | -1.1 | -1.3 | -0.8 | -0.7 |
| 101001_at   | 5031439A09Rik | 1.8  | -2.1 | -0.7 | -0.5 |
| 101001_at   | 5031439A09Rik | -1.2 | -1.2 | -0.7 | -0.5 |
| 163902_at   | Apln          |      |      | -0.7 | -0.7 |
| 102833_at   | Cbx2          | 0    | 1.3  | -0.7 | -0.8 |
| 101973_at   | Cited2        |      |      | -0.7 | -0.7 |
| 164692_i_at | Gabarapl1     |      |      | -0.7 | -2.6 |
| 97520_s_at  | Nnat          | 1.3  | 1.1  | -0.7 | -0.6 |
| 94400_at    | 1110051M20Rik | 1.1  | -1.1 | -0.6 | -0.9 |
| 113567_at   | 1810034B16Rik |      |      | -0.6 | -1.2 |
| 109689_at   | Agtrl1        |      |      | -0.6 | -0.7 |
| 94036_at    | Cdc42ep4      |      |      | -0.6 | -1   |
| 163796_at   | Dact1         |      |      | -0.6 | -0.8 |
| 97509_f_at  | Fgfr1         | 1.1  | 1.2  | -0.6 | -0.6 |
| 97509_f_at  | Fgfr1         | -1.1 | 1.5  | -0.6 | -0.6 |
| 98817_at    | Fst           | 1.2  | -1.6 | -0.6 | -1   |
| 98852_at    | Sall3         | 1.5  | -1.6 | -0.6 | -0.8 |
| 162552_at   | 2310016C16Rik |      |      | -0.5 | -0.6 |
| 100600_at   | Cd24a         | 1.3  | -1.5 | -0.5 | -0.5 |
| 100600_at   | Cd24a         | 2.4  | 1.3  | -0.5 | -0.5 |
| 100407_at   | Gal           | 1.2  | -1.2 | -0.5 | -0.5 |
| 100407_at   | Gal           | 1    | -1.1 | -0.5 | -0.5 |
| 103628_at   | Lef1          | 1.2  | -1   | -0.5 | -0.6 |
| 103628_at   | Lef1          | 1.1  | -1.2 | -0.5 | -0.6 |
| 95016_at    | Nrp           | -1.5 | 1.4  | -0.5 | -0.5 |
| 94449_at    | Pcdhga12      | 1.1  | 1.1  | -0.5 | -0.6 |
| 94449_at    | Pcdhga12      | -1.8 | 2    | -0.5 | -0.6 |
| 101451_at   | Peg3          | 1.5  | 1.1  | -0.5 | -0.6 |
| 93724_at    | Ror2          |      |      | -0.5 | -0.9 |
| 107154_f_at | ---           |      |      | 0.5  | 2.5  |
| 108848_g_at | ---           |      |      | 0.5  | 0.6  |
| 116418_at   | ---           |      |      | 0.5  | 0.5  |
| 129297_at   | ---           |      |      | 0.5  | 1.3  |
| 130494_f_at | ---           |      |      | 0.5  | 0.5  |
| 134932_at   | ---           |      |      | 0.5  | 0.5  |

|             |                 |      |      |     |     |
|-------------|-----------------|------|------|-----|-----|
| 167758_at   | ---             |      |      | 0.5 | 0.7 |
| 167843_f_at | 1110051B16Rik   |      |      | 0.5 | 0.6 |
| 108022_at   | 1200002M06Rik   |      |      | 0.5 | 0.5 |
| 110503_at   | 1500009K05Rik   |      |      | 0.5 | 0.9 |
| 165677_at   | 1700011I11Rik   |      |      | 0.5 | 0.5 |
| 106204_at   | 1810013D05Rik   |      |      | 0.5 | 0.5 |
| 167192_at   | 2700083E18Rik   |      |      | 0.5 | 0.6 |
| 99501_at    | 3100002M17Rik   | -1   | -1.2 | 0.5 | 0.9 |
| 99501_at    | 3100002M17Rik   | 1.1  | -1.2 | 0.5 | 0.9 |
| 113265_at   | 5730455O13Rik   |      |      | 0.5 | 3.8 |
| 162843_at   | 5730469D23Rik   |      |      | 0.5 | 0.5 |
| 129046_f_at | A330103N21Rik   |      |      | 0.5 | 1.1 |
| 106294_at   | AI642036        |      |      | 0.5 | 0.6 |
| 160702_at   | BC031468        |      |      | 0.5 | 0.6 |
| 164330_f_at | Bear1           |      |      | 0.5 | 0.6 |
| 110446_at   | C130034K06      |      |      | 0.5 | 3.6 |
| 160493_at   | Cd63            |      |      | 0.5 | 0.7 |
| 95661_at    | Cd9             | 1.2  | 1    | 0.5 | 0.9 |
| 163262_at   | Cldn6           |      |      | 0.5 | 0.5 |
| 101963_at   | Ctsl            | -2.2 | -1.2 | 0.5 | 0.6 |
| 101963_at   | Ctsl            | 1.4  | -1   | 0.5 | 0.6 |
| 101963_at   | Ctsl            | 1.1  | 1    | 0.5 | 0.6 |
| 101963_at   | Ctsl            | 1.2  | -1   | 0.5 | 0.6 |
| 97013_f_at  | Cyba            |      |      | 0.5 | 0.5 |
| 166740_at   | D16Ium22e       |      |      | 0.5 | 3   |
| 103665_at   | Elovl6          | -1.2 | 1.1  | 0.5 | 0.5 |
| 96868_at    | Fgb             |      |      | 0.5 | 2.7 |
| 101106_at   | G3bp2-pending   | 1.2  | -1.3 | 0.5 | 0.6 |
| 114749_at   | Gpr23           |      |      | 0.5 | 0.8 |
| 106196_at   | Htf9c           |      |      | 0.5 | 1   |
| 96269_at    | Idi1            | -1.1 | 1    | 0.5 | 0.5 |
| 166226_f_at | Itm1            |      |      | 0.5 | 0.9 |
| 167118_f_at | Jmj             |      |      | 0.5 | 0.6 |
| 114629_at   | Lbc11           |      |      | 0.5 | 0.6 |
| 103377_at   | Lrp2            |      |      | 0.5 | 0.7 |
| 103806_at   | Lrp5            |      |      | 0.5 | 2.4 |
| 110008_at   | Mint-pending    |      |      | 0.5 | 0.6 |
| 116837_at   | Myo6            |      |      | 0.5 | 1.2 |
| 94461_at    | Pbef-pending    | -1.2 | -1.2 | 0.5 | 0.6 |
| 94461_at    | Pbef-pending    | 0    | -1.5 | 0.5 | 0.6 |
| 94461_at    | Pbef-pending    | -1.1 | -1.1 | 0.5 | 0.6 |
| 96841_at    | Pim3            | -1   | 1.2  | 0.5 | 0.5 |
| 96841_at    | Pim3            | 1.2  | -1   | 0.5 | 0.5 |
| 96841_at    | Pim3            | 1.2  | -1.1 | 0.5 | 0.5 |
| 96841_at    | Pim3            | -1.3 | -1.1 | 0.5 | 0.5 |
| 103888_at   | Rbpms           |      |      | 0.5 | 0.5 |
| 109332_at   | Rent1           |      |      | 0.5 | 0.8 |
| 102370_at   | Retsdr2-pending | -1.1 | -1.1 | 0.5 | 0.5 |
| 115062_at   | Rev11           |      |      | 0.5 | 1.2 |
| 163626_at   | Rnasep1         |      |      | 0.5 | 1.1 |
| 162562_at   | Rnf128          |      |      | 0.5 | 0.8 |
| 109622_at   | Sh3bp4          |      |      | 0.5 | 0.7 |

|             |               |      |      |     |     |
|-------------|---------------|------|------|-----|-----|
| 170064_f_at | Slc2a3        |      |      | 0.5 | 0.6 |
| 116003_at   | Slc35e3       |      |      | 0.5 | 0.9 |
| 99133_at    | Slc3a2        | -1.3 | 1.1  | 0.5 | 0.6 |
| 99133_at    | Slc3a2        | 1.1  | 1    | 0.5 | 0.6 |
| 99133_at    | Slc3a2        | -1.3 | 1    | 0.5 | 0.6 |
| 99133_at    | Slc3a2        | 2.3  | -1   | 0.5 | 0.6 |
| 99133_at    | Slc3a2        | 1.5  | 1.3  | 0.5 | 0.6 |
| 99133_at    | Slc3a2        | -1.3 | -1   | 0.5 | 0.6 |
| 97160_at    | Sparc         | 1.1  | 1.5  | 0.5 | 0.9 |
| 97160_at    | Sparc         | 1    | 1.4  | 0.5 | 0.9 |
| 97722_at    | Ssr1          | 1.5  | -1.2 | 0.5 | 0.6 |
| 165449_f_at | Ube2j1        |      |      | 0.5 | 0.7 |
| 106064_at   | Zdhhc12       |      |      | 0.5 | 0.5 |
| 136554_r_at | ---           |      |      | 0.6 | 1.9 |
| 141090_f_at | ---           |      |      | 0.6 | 0.7 |
| 161050_at   | ---           |      |      | 0.6 | 0.5 |
| 168454_f_at | ---           |      |      | 0.6 | 0.6 |
| 162704_i_at | 0610030G03Rik |      |      | 0.6 | 0.9 |
| 167853_f_at | 1110023P21Rik |      |      | 0.6 | 0.8 |
| 106475_at   | 1810060K07Rik |      |      | 0.6 | 0.7 |
| 132361_at   | 2210411K11Rik |      |      | 0.6 | 0.9 |
| 111494_at   | 2310020P08Rik |      |      | 0.6 | 0.6 |
| 167237_f_at | 2510027N19Rik |      |      | 0.6 | 0.9 |
| 93569_f_at  | 2610042L04Rik | 2.8  | 1.2  | 0.6 | 0.7 |
| 133830_at   | 2810004A10Rik |      |      | 0.6 | 1.1 |
| 136134_at   | 2810403A07Rik |      |      | 0.6 | 1.2 |
| 102232_at   | 4833420E20Rik | 1    | -1.1 | 0.6 | 1.3 |
| 115752_at   | 6030443O07Rik |      |      | 0.6 | 0.5 |
| 103716_at   | 6430546F08Rik | -1.2 | -1.5 | 0.6 | 0.7 |
| 115792_at   | 9830148O20Rik |      |      | 0.6 | 0.8 |
| 106615_at   | AA407558      |      |      | 0.6 | 0.5 |
| 104714_at   | AA959601      | -1   | -1.4 | 0.6 | 0.7 |
| 96781_at    | AL023001      | 1.2  | -1.1 | 0.6 | 0.5 |
| 130491_at   | Amn           |      |      | 0.6 | 1   |
| 106292_at   | Bcl11a        |      |      | 0.6 | 1.4 |
| 99561_f_at  | Cldn7         |      |      | 0.6 | 0.7 |
| 94831_at    | Ctsb          | -1.6 | -1.2 | 0.6 | 0.7 |
| 94831_at    | Ctsb          | -1.4 | -1.5 | 0.6 | 0.7 |
| 94831_at    | Ctsb          | 1    | -1.4 | 0.6 | 0.7 |
| 94831_at    | Ctsb          | -1.1 | 1.9  | 0.6 | 0.7 |
| 94831_at    | Ctsb          | -1.7 | 1.3  | 0.6 | 0.7 |
| 101019_at   | Ctsc          | 1.1  | -1.1 | 0.6 | 0.6 |
| 101019_at   | Ctsc          | 1.3  | -1   | 0.6 | 0.6 |
| 104717_at   | D5Ert689e     | 1.5  | -1.8 | 0.6 | 0.6 |
| 170808_s_at | D6Wsu176e     |      |      | 0.6 | 0.5 |
| 98045_s_at  | Dab2          | -1.2 | -1   | 0.6 | 0.7 |
| 136630_i_at | F11r          |      |      | 0.6 | 1.2 |
| 99378_f_at  | H2-Q1         | -1.1 | 1.1  | 0.6 | 1.1 |
| 99378_f_at  | H2-Q1         | -1.1 | -1.3 | 0.6 | 1.1 |
| 98627_at    | Igfbp2        | 1.1  | -1.8 | 0.6 | 0.6 |
| 98627_at    | Igfbp2        | 1.1  | -1.3 | 0.6 | 0.6 |
| 93261_at    | Lgmn          | -1.5 | -1.1 | 0.6 | 0.9 |

|             |               |      |      |     |     |
|-------------|---------------|------|------|-----|-----|
| 116312_at   | LOC234344     |      |      | 0.6 | 0.5 |
| 168371_f_at | Lrrc5         |      |      | 0.6 | 0.8 |
| 104554_at   | Nr2f6         | 1.2  | 1.1  | 0.6 | 0.5 |
| 103502_at   | Nrk           | 1.7  | 2.8  | 0.6 | 0.9 |
| 103502_at   | Nrk           | 1.2  | 1.8  | 0.6 | 0.9 |
| 101926_at   | Pim2          | 1.5  | 1.1  | 0.6 | 0.5 |
| 101926_at   | Pim2          | 1.1  | 1.2  | 0.6 | 0.5 |
| 104343_f_at | Pla2g12       | 1.2  | -1.1 | 0.6 | 0.5 |
| 112828_at   | Podxl         |      |      | 0.6 | 0.6 |
| 165599_at   | Ranbp2        |      |      | 0.6 | 0.5 |
| 99591_i_at  | Rdh11         |      |      | 0.6 | 0.5 |
| 103818_at   | Slc7a7        | -1.3 | 1.5  | 0.6 | 0.6 |
| 97132_at    | Soat2         | -1   | 1.1  | 0.6 | 0.6 |
| 102959_at   | Tle4          | 1.2  | 1.2  | 0.6 | 2.2 |
| 161361_s_at | Tnnt1         |      |      | 0.6 | 1.3 |
| 112373_at   | Ube2v1        |      |      | 0.6 | 0.7 |
| 95000_g_at  | ---           | -1.1 | -1.1 | 0.7 | 1.2 |
| 165695_at   | 1810011O16Rik |      |      | 0.7 | 0.9 |
| 112392_at   | 1810027I20Rik |      |      | 0.7 | 3.7 |
| 107491_at   | 2010204K13Rik |      |      | 0.7 | 0.5 |
| 115347_at   | 2700078E11Rik |      |      | 0.7 | 0.5 |
| 140759_at   | 4831403C07Rik |      |      | 0.7 | 1.4 |
| 105273_at   | 6030405M08Rik |      |      | 0.7 | 3.3 |
| 93626_at    | Abcg2         | -1.1 | -1.2 | 0.7 | 0.9 |
| 109133_at   | Als2          |      |      | 0.7 | 0.6 |
| 94834_at    | Ctsh          | -1.3 | -1.2 | 0.7 | 0.8 |
| 160369_at   | Dhcr24        |      |      | 0.7 | 1.1 |
| 100479_at   | Dnmt3a        | 1.5  | 1.2  | 0.7 | 0.8 |
| 164028_at   | Dnmt3b        |      |      | 0.7 | 0.6 |
| 103977_at   | F10           | 1.4  | -1.1 | 0.7 | 0.5 |
| 104419_at   | F730017H24Rik | 2    | -1   | 0.7 | 2.9 |
| 93785_at    | Folr1         | -1.3 | -1.1 | 0.7 | 0.6 |
| 93785_at    | Folr1         | 0    | 1.1  | 0.7 | 0.6 |
| 165915_i_at | Foxp1         |      |      | 0.7 | 0.5 |
| 114032_f_at | Glcci1        |      |      | 0.7 | 3.6 |
| 101676_at   | Gpx3          | 1    | -1.1 | 0.7 | 0.7 |
| 101676_at   | Gpx3          | -1.1 | -1.1 | 0.7 | 0.7 |
| 93543_f_at  | Gstm1         | -1.3 | 1.1  | 0.7 | 0.7 |
| 102235_at   | Lmyc1         | -1.6 | -1.2 | 0.7 | 0.6 |
| 112400_at   | mKIAA0182     |      |      | 0.7 | 0.6 |
| 103868_at   | Nufip1        | 1    | -1.1 | 0.7 | 0.9 |
| 108076_at   | Nup210        |      |      | 0.7 | 0.6 |
| 95465_s_at  | Pr1           |      |      | 0.7 | 0.8 |
| 93953_at    | Prss12        | 2.6  | -1.3 | 0.7 | 0.6 |
| 93953_at    | Prss12        | 1.5  | -1.3 | 0.7 | 0.6 |
| 112405_at   | Slc16a3       |      |      | 0.7 | 0.5 |
| 103357_at   | Slc2a2        | 0    | -2.1 | 0.7 | 0.6 |
| 103357_at   | Slc2a2        | -1.2 | -2.3 | 0.7 | 0.6 |
| 92699_at    | Slc7a9        |      |      | 0.7 | 0.5 |
| 139602_at   | Tk1           |      |      | 0.7 | 1.9 |
| 167188_at   | ---           |      |      | 0.8 | 0.8 |
| 167965_f_at | ---           |      |      | 0.8 | 0.6 |

|             |               |      |      |     |     |
|-------------|---------------|------|------|-----|-----|
| 95518_at    | 1810015C04Rik |      |      | 0.8 | 1.1 |
| 109167_at   | 2400008B06Rik |      |      | 0.8 | 0.5 |
| 110467_at   | 2610042L04Rik |      |      | 0.8 | 0.5 |
| 116635_at   | Abca3         |      |      | 0.8 | 0.8 |
| 163015_at   | Amn           |      |      | 0.8 | 0.8 |
| 97887_at    | Apoc2         | -2   | 0    | 0.8 | 0.8 |
| 97887_at    | Apoc2         | 1    | -1.8 | 0.8 | 0.8 |
| 97887_at    | Apoc2         | 1    | -1.3 | 0.8 | 0.8 |
| 97887_at    | Apoc2         | -1.5 | -1.1 | 0.8 | 0.8 |
| 135278_at   | Atrx          |      |      | 0.8 | 4   |
| 131000_f_at | BB114266      |      |      | 0.8 | 0.8 |
| 99535_at    | Ccrn4l        | 1.2  | -1.1 | 0.8 | 0.6 |
| 99535_at    | Ccrn4l        | 1    | -1.1 | 0.8 | 0.6 |
| 99535_at    | Ccrn4l        | 1.2  | 1.1  | 0.8 | 0.6 |
| 97518_at    | Fdft1         | -1.1 | 1.2  | 0.8 | 0.7 |
| 112922_i_at | Kdelr3        |      |      | 0.8 | 1.4 |
| 92550_at    | Krt1-19       | 1.2  | 1.2  | 0.8 | 1.1 |
| 115820_at   | Nav1          |      |      | 0.8 | 0.6 |
| 109069_at   | Slc40a1       |      |      | 0.8 | 0.8 |
| 160249_at   | Tpd52         |      |      | 0.8 | 0.8 |
| 102764_at   | Trap1a        | 1.2  | 1.2  | 0.8 | 1.4 |
| 102764_at   | Trap1a        | 3.5  | 1.2  | 0.8 | 1.4 |
| 95350_at    | Ttr           | 1.2  | 1.3  | 0.8 | 0.6 |
| 108784_at   | ---           |      |      | 0.9 | 0.6 |
| 133204_at   | ---           |      |      | 0.9 | 2.5 |
| 137047_at   | ---           |      |      | 0.9 | 1.2 |
| 165656_i_at | ---           |      |      | 0.9 | 0.9 |
| 95954_at    | ---           | -1.1 | 1    | 0.9 | 3.2 |
| 130779_f_at | 1200003C15Rik |      |      | 0.9 | 1.6 |
| 113036_at   | 2310015I10Rik |      |      | 0.9 | 0.7 |
| 93568_i_at  | 2610042L04Rik | 2.8  | 1.2  | 0.9 | 1   |
| 98042_at    | 4833411K15Rik |      |      | 0.9 | 0.8 |
| 165601_f_at | 9630060C05Rik |      |      | 0.9 | 0.9 |
| 96094_at    | Apoa1         | -1   | 1.4  | 0.9 | 0.9 |
| 96094_at    | Apoa1         | -1.2 | -1.2 | 0.9 | 0.9 |
| 96094_at    | Apoa1         | -1.3 | -1.8 | 0.9 | 0.9 |
| 93840_at    | Apom          | -1.2 | -1.2 | 0.9 | 0.9 |
| 162690_at   | B130036O03    |      |      | 0.9 | 0.7 |
| 160904_at   | B230317C12Rik |      |      | 0.9 | 0.5 |
| 115010_at   | BC042513      |      |      | 0.9 | 1.1 |
| 167479_at   | Car7          |      |      | 0.9 | 1.3 |
| 92633_at    | Ctsz          | -2.7 | -1.2 | 0.9 | 0.9 |
| 112955_at   | D10Bwg0792e   |      |      | 0.9 | 0.7 |
| 165792_at   | Dab2          |      |      | 0.9 | 1.1 |
| 97819_at    | Gsto1         | -1.2 | 1.4  | 0.9 | 0.5 |
| 97444_at    | Ifi30         | -1.3 | 1.1  | 0.9 | 0.6 |
| 97444_at    | Ifi30         | -1.1 | 1.1  | 0.9 | 0.6 |
| 97444_at    | Ifi30         | -1.4 | 1.2  | 0.9 | 0.6 |
| 129147_r_at | Igsf9         |      |      | 0.9 | 0.7 |
| 95511_at    | Itga6         | -1.1 | -2.1 | 0.9 | 2.9 |
| 100095_at   | Scarb1        | 1.2  | 1.4  | 0.9 | 0.8 |
| 103776_at   | ---           | 1.1  | 1.2  | 1   | 1.3 |

|             |               |      |      |     |     |
|-------------|---------------|------|------|-----|-----|
| 129928_f_at | ---           |      |      | 1   | 0.8 |
| 113314_at   | 4833415N24Rik |      |      | 1   | 4.3 |
| 163489_at   | Ankrd3        |      |      | 1   | 0.7 |
| 165359_f_at | Apoa1         |      |      | 1   | 1   |
| 100078_at   | Apoa4         | -1.1 | 1.4  | 1   | 1.3 |
| 100078_at   | Apoa4         | -1.5 | 1.2  | 1   | 1.3 |
| 107498_at   | BC019216      |      |      | 1   | 0.8 |
| 104585_at   | Crb3          | -1.1 | 1.1  | 1   | 0.8 |
| 96134_at    | Dp111         | -3.5 | 2.4  | 1   | 0.8 |
| 96771_at    | Erbb3         | 1    | 1.2  | 1   | 0.8 |
| 104210_at   | Itga3         | 1.1  | 1.2  | 1   | 1   |
| 101561_at   | Mt2           | -1.1 | -1.4 | 1   | 0.8 |
| 101561_at   | Mt2           | 1.4  | 1.5  | 1   | 0.8 |
| 92644_s_at  | Myb           | 1.1  | -1.1 | 1   | 0.6 |
| 92644_s_at  | Myb           | -1.3 | 1    | 1   | 0.6 |
| 101368_at   | Pem           | -1.1 | -1.1 | 1   | 0.7 |
| 164545_f_at | Pgk1          |      |      | 1   | 0.9 |
| 96047_at    | Rbp4          | 1.4  | -1.1 | 1   | 1.1 |
| 96047_at    | Rbp4          | 2.3  | 1.7  | 1   | 1.1 |
| 96047_at    | Rbp4          | 1.8  | 1.6  | 1   | 1.1 |
| 96047_at    | Rbp4          | 1.5  | 1.5  | 1   | 1.1 |
| 96047_at    | Rbp4          | 2.1  | 1.2  | 1   | 1.1 |
| 96047_at    | Rbp4          | 2.4  | 1.5  | 1   | 1.1 |
| 96038_at    | Rnase4        | -1.1 | -1.1 | 1   | 3.2 |
| 108780_at   | Tmem2         |      |      | 1   | 1.3 |
| 104990_at   | ---           |      |      | 1.1 | 0.7 |
| 161626_f_at | ---           |      |      | 1.1 | 1.4 |
| 92430_at    | 1110027L01Rik | 1.1  | -1.1 | 1.1 | 1.6 |
| 110309_at   | 2610028H14Rik |      |      | 1.1 | 1.1 |
| 96491_at    | B130024H06Rik | 1.7  | -1.8 | 1.1 | 0.5 |
| 162607_i_at | BC026370      |      |      | 1.1 | 0.6 |
| 167608_f_at | D030016E14Rik |      |      | 1.1 | 1.4 |
| 115066_at   | Dnmt3b        |      |      | 1.1 | 0.6 |
| 111529_at   | Gats          |      |      | 1.1 | 0.7 |
| 98000_at    | Ly64          | 1.4  | 1.2  | 1.1 | 1.1 |
| 98000_at    | Ly64          | -2.1 | -1.1 | 1.1 | 1.1 |
| 98000_at    | Ly64          | 1.3  | 1.3  | 1.1 | 1.1 |
| 93573_at    | Mt1           | -1.6 | -1   | 1.1 | 1.2 |
| 93573_at    | Mt1           | -1.1 | -1.3 | 1.1 | 1.2 |
| 114845_s_at | Pepf-pending  |      |      | 1.1 | 1   |
| 167216_f_at | Prkaca        |      |      | 1.1 | 0.7 |
| 99475_at    | Socs2         | -1.5 | -1.3 | 1.1 | 0.8 |
| 100499_at   | Stx3          | -1.2 | -1.2 | 1.1 | 0.5 |
| 100499_at   | Stx3          | 1.4  | 1.5  | 1.1 | 0.5 |
| 100499_at   | Stx3          | -1.1 | -1.2 | 1.1 | 0.5 |
| 135760_at   | ---           |      |      | 1.2 | 2.1 |
| 168398_f_at | ---           |      |      | 1.2 | 1   |
| 95702_at    | 1300006C19Rik |      |      | 1.2 | 0.7 |
| 131216_f_at | A1466840      |      |      | 1.2 | 0.7 |
| 112445_at   | LOC213048     |      |      | 1.2 | 0.8 |
| 162245_f_at | Myo6          |      |      | 1.2 | 0.6 |
| 138014_at   | Nup153        |      |      | 1.2 | 0.9 |

|             |               |      |      |     |     |
|-------------|---------------|------|------|-----|-----|
| 162929_at   | Sall2         |      |      | 1.2 | 0.6 |
| 103795_f_at | Timd2         | -1.7 | -1.4 | 1.2 | 2.9 |
| 115112_at   | 2510015N06Rik |      |      | 1.3 | 3.3 |
| 105008_at   | 2610034N15Rik |      |      | 1.3 | 3.2 |
| 100009_r_at | Sox2          | 1.4  | 1.2  | 1.3 | 1.3 |
| 171194_at   | ---           |      |      | 1.4 | 3.5 |
| 97317_at    | Enpp2         | -1   | -1.4 | 1.5 | 1.2 |
| 97317_at    | Enpp2         | 1.2  | -1.5 | 1.5 | 1.2 |
| 165641_at   | Nudt6         |      |      | 1.5 | 1.3 |
| 138408_at   | ---           |      |      | 1.6 | 3.1 |
| 105198_at   | 4631416I11Rik |      |      | 1.6 | 1.5 |
| 93133_at    | Slc7a3        | 1.3  | -1.1 | 1.6 | 1.4 |
| 106577_at   | Csna          |      |      | 1.7 | 0.9 |
| 97742_s_at  | Fgf8          | 1.6  | -3   | 1.7 | 4   |
| 111347_at   | Gmfb          |      |      | 1.7 | 0.9 |
| 162728_at   | Prodh         |      |      | 1.7 | 1.3 |
| 102220_at   | Utf1          |      |      | 1.7 | 1.3 |
| 162276_i_at | C1qb          |      |      | 1.8 | 1.5 |
| 164467_f_at | Gjb3          |      |      | 1.8 | 0.8 |
| 102418_at   | Tex19         |      |      | 1.8 | 0.7 |
| 160401_r_at | Cnot7         |      |      | 1.9 | 3   |
| 165460_at   | Ppap2c        |      |      | 1.9 | 3.6 |
| 168542_f_at | ---           |      |      | 2   | 2.8 |
| 161906_f_at | 2410022L05Rik |      |      | 2   | 1   |
| 166030_i_at | 4921525L17Rik |      |      | 2   | 5.3 |
| 112209_at   | 2410003B16Rik |      |      | 2.2 | 2.9 |
| 111359_at   | 6330407P03Rik |      |      | 2.3 | 2.3 |
| 165935_at   | 2010003K15Rik |      |      | 2.4 | 1.1 |
| 134223_at   | ---           |      |      | 2.5 | 3.3 |
| 129326_at   | ---           |      |      | 2.6 | 1.3 |
| 168426_f_at | Crb3          |      |      | 2.7 | 3.6 |
| 134260_at   | ---           |      |      | 2.8 | 2.7 |
| 108516_at   | 0610011L13Rik |      |      | 2.8 | 1   |
| 129347_at   | 2900024N03Rik |      |      | 2.8 | 2.1 |
| 133037_at   | Pex7          |      |      | 2.8 | 1.3 |
| 97413_at    | 1600029D21Rik | -1.1 | -1.5 | 3   | 0.7 |
| 162869_at   | Enc1          |      |      | 3   | 1   |
| 130994_at   | Nkd2          |      |      | 3   | 1.7 |
| 113431_at   | Rnf14         |      |      | 3   | 3.7 |
| 128830_r_at | 6330403E24Rik |      |      | 3.1 | 3.4 |
| 132794_at   | ---           |      |      | 3.3 | 0.9 |
| 166437_f_at | Fzd8          |      |      | 3.4 | 3.3 |
| 167004_r_at | D830007F02Rik |      |      | 3.5 | 4   |
| 107621_at   | D7Ert458e     |      |      | 3.8 | 0.5 |
| 165956_f_at | 2310002A05Rik |      |      | 4.4 | 0.8 |
| 168503_at   | ---           |      |      | 4.6 | 2.7 |
| 165637_i_at | 2610034E18Rik |      |      | 4.6 | 4.4 |
| 170625_i_at | 5730536A07Rik |      |      | 4.7 | 0.5 |

The Affymetrix ID (MGU74v2 probe set ID), Gene symbol, signal  $\log_2$  ratios for E6.0 and E6.5  $\beta$ -catenin homozygous null mutants and signal  $\log_2$  ratios for both conditional  $\beta$ -catenin mutant (CKO) comparisons. Note that redundant probe set IDs appear because the  $\beta$ -catenin homozygous null mutants data was collected with the Mu11k platform that contains multiple probe sets that map to only one probe set on the MGU74v2 arrays.
