# Supplementary material for: Dissecting Wnt/β-catenin signaling during gastrulation using RNA interference in mouse embryos
Source: Oxford University Press journal article supplement (doi:10.1242/dev.01842), 2005-04-28
Supplement: dev01842supptable3.pdf [file dev01842supptable3.pdf]

Table S3. Genes with Grsf1 high-affinity consensus-binding sites

| Transcript ID         | Total matches | Locations | Gene ID              | Sequence                                                                                                                                                                                                                                                                                                                                                                                                                                                                                                                                                                                                                                                                                                                                                                                                                                                                                                                                                                                                                                                                                                                      |
|-----------------------|---------------|-----------|----------------------|-------------------------------------------------------------------------------------------------------------------------------------------------------------------------------------------------------------------------------------------------------------------------------------------------------------------------------------------------------------------------------------------------------------------------------------------------------------------------------------------------------------------------------------------------------------------------------------------------------------------------------------------------------------------------------------------------------------------------------------------------------------------------------------------------------------------------------------------------------------------------------------------------------------------------------------------------------------------------------------------------------------------------------------------------------------------------------------------------------------------------------|
| ENSMUST0000000028.1   | 1             | 73        | ENSMUSG0000000028.1  | TGGAACACATTCAATAATGTGTGACTGAATTTACTTTATGTCTA<br>AGAGTATATTTGTTTTCTAAGTATGCC <b>AGGGT</b> CAGATAATAGACCTT<br>CCTTCCCGAAGTAAAGATGTCTGCCAAACATAGGTGGTTTTGGGTG<br>ACTGGACGTTAGCGTCAACACCCGGCAACAAGGAACCAATCAGAAAG<br>GAGGAAAGGCTAAGAATTATTTGGCTGTGGCGTGGACCAATCAGAA<br>GAGCTGTGATTTGGCGGGAGTCTTGACGACCTCCGGGGCTGTCCGT<br>GTCTCAGCGCCAGTTCTAGGTATCCGCCGCTGTGGCT                                                                                                                                                                                                                                                                                                                                                                                                                                                                                                                                                                                                                                                                                                                                                                    |
| ENSMUST0000000033.1   | 2             | 87,502    | ENSMUSG0000000033.1  | AGCATTTCCTCATTCTCTAGAGGACTTCTCTGAAGCCACAGAAATT<br>AGAGGTGATTTTTCCCGGGTGTGTAGGGCCACTGGCTT <b>AGGGT</b><br>GAACCCTAGTCTCCACTCCACCCCTCAAAGAAGTGAAGTGAATT<br>CCCTAAAATCCATCTGTGTGTTTTTCATCTCCCATTTTTAAGCAATT<br>AAAAATTAAGCTCCCTAAAATTCATGTTGGGAATTTCTTAAACCC<br>AACAGCAACAACAACCACCTAATCTTACAAATTAGTCTAGGATT<br>TTGTGGGTTCCCAAGCTTCTAACAAGATATTTGGGTTCCTCCG<br>TTAGGCCTGGATCAAGATGCCCCCATTTTTGCATAGAATAATTTT<br>CCTCATTTCCCAACTTGGATTCTAATTTTTCTGGAATCTCAAATTT<br>AGTCATTCGCCACAGTTTTCCCATTTATGGAGTCGCCCTTCGAGTCC<br>CCCTACTTTGGGCCGCTCATTTCCAGGACCCGCAATCAGAC <b>AGGG</b><br><b>TCTGACTTGGGATCCCCGAAATTTGATCATTGTTTCCGCTGGCCAC</b><br><b>TTTCGGCAGCTTCCCGTCTGCGCATAACAGTGGTATCGCCCTCGT</b><br><b>CACTTCTCCTACGGTGTCCAGCGGCAGCACAGATTTGGAAAAGT</b><br><b>GTGTGTGCCCCAAACACGCACTGGACACTGCGCGCGCGCCAGGACG</b><br><b>TGGGCAGTGTGCTCCCGTGTCCAGGAAAACGACTGGGCATTTGCC</b><br><b>CCAGTTTCCCCCAAATTTGGGCATGTCCCGGGTCTTCCCAAGGGA</b><br><b>CTGGGCGTTGCCCGGTTCACTGGGGACTGCCCTTGGGGTCTCGCT</b><br><b>CACCTTCAGCAGCGTCCACTTCAGCAGCTCCCACTTCAATCCGCTCT</b><br><b>CCCGCCCTTCTCCTCCGATCCTCCTGCGCCAGCGGACCCGACCTTC</b><br><b>GGCCTTGTGGTACCA</b> |
| ENSMUST00000006749.1  | 1             | 73        | ENSMUSG0000000122.1  | GGTCCCGGATGTTGCGGGCAGTATGAGGCGAGCGCAGGGGGACAGG<br>GACCAGCAGCTGTGCGCCGCTTCTC <b>AGGGT</b> GAAGAAAACCAGAA<br>ACCTTTGCCCCCTGACTTTGGAGACTCAGTTTAACTTCAAACGTG<br>CG                                                                                                                                                                                                                                                                                                                                                                                                                                                                                                                                                                                                                                                                                                                                                                                                                                                                                                                                                                |
| ENSMUST00000000284.1  | 1             | 6         | ENSMUSG00000000275.1 | GCGGT <b>AGGGT</b> GCGCAGCTGTCCCTGCGCGTCACGTGCGGTGAGCCC<br>ACGAGCGCG                                                                                                                                                                                                                                                                                                                                                                                                                                                                                                                                                                                                                                                                                                                                                                                                                                                                                                                                                                                                                                                          |
| ENSMUST00000000394.1  | 1             | 23        | ENSMUSG00000000384.1 | CGTAGGCTGATGGAGGTCAGTG <b>AGGGT</b> GATCGCCGCCGAGTCTGG<br>CGTCTGGAGAGACCGGGTTTCTGAACGGAACAAGACTGGCAGACT<br>TGCCGAAAGAAACGTCATGTGGTTATGTAGCGTGTCTCGAAAAAG<br>GACTTCGGAGTCACCTACTAGGAGTCTTCCCTCCCTCCCTCCCTCT<br>TCCCTGCGCCAGCATC                                                                                                                                                                                                                                                                                                                                                                                                                                                                                                                                                                                                                                                                                                                                                                                                                                                                                                |
| ENSMUST00000000642.1  | 1             | 234       | ENSMUSG00000000628.1 | GCCACATTGTTGCACCAACTCCAGTGTGGAGTCTCAGGACACCAC<br>AGGCTACCCGGAGTTGTTCTGCTTTGGAGATCCGAGGGCAGGAGCA<br>TCACGCCAGTGACTCTGATAGGTGCGATCGCCGATTTGGAACAGAA<br>CTGTCAATTTTTTCCGAAGTTGAGCCTTAGTGACCAGTGAGTGAA<br>GTTAGCGACGGGACGCTAAGCAGCTAGACCCGTCGGCAGGAGTGAG<br>ACT <b>AGGGT</b> ACCTTCTAGTAGTTGTGATTAATAAAATTAATAAA<br>GAAAAAATAAACCTGTTTCTGAAACTTGGAGCCCTCAGCTGGT<br>GAGCCATCGTGGTTAAGCTTCTTTGTGTGGCTCCTGGAGTCTTCGA<br>TCCCAGCCGACACCCGGGCTGGTTTCAAAGCGGTCGGACAGCGC<br>TGCCGTCTCCATCGGTAGCGCTCGAGCCTCGGTTTCTCTATTTGGC<br>CCCCTGCGCCGCAACAAG                                                                                                                                                                                                                                                                                                                                                                                                                                                                                                                                                                                         |
| ENSMUST000000062678.1 | 1             | 26        | ENSMUSG00000000951.1 | GCGGAAGCGTCGAGTGCCTGGTCTC <b>AGGGT</b> TCTCCTCACCATGGTT<br>CCCGGAGTGCCTCCCGCCGGAGATCCAGCTGGCGCAGCGCTGG<br>CGGCAATGAACAGGTGA                                                                                                                                                                                                                                                                                                                                                                                                                                                                                                                                                                                                                                                                                                                                                                                                                                                                                                                                                                                                   |
| ENSMUST000000041898.1 | 1             | 29        | ENSMUSG00000000951.1 | CCAGCGGAAGCGTCGAGTGCCTGGTCTC <b>AGGGT</b> TCTCCTCACC                                                                                                                                                                                                                                                                                                                                                                                                                                                                                                                                                                                                                                                                                                                                                                                                                                                                                                                                                                                                                                                                          |
| ENSMUST00000000977.1  | 1             | 29        | ENSMUSG00000000951.1 | CCAGCGGAAGCGTCGAGTGCCTGGTCTC <b>AGGGT</b> TCTCCTCACC                                                                                                                                                                                                                                                                                                                                                                                                                                                                                                                                                                                                                                                                                                                                                                                                                                                                                                                                                                                                                                                                          |
| ENSMUST00000000984.1  | 2             | 43,187    | ENSMUSG00000000958.1 | AGCAAATCAGCAAAAAGAGGATCTFAGCGAATCAGTTGGTT <b>AGGG</b><br><b>TTGGTTTCTCATAACAGGCATCTCAGCGCAGGGACATTTGAAACTGA</b><br><b>AATCAGAGGGGAGAGACTTTGGGGTCAGGGGGAGGCAGAAAAAAG</b><br><b>TTTTACCAAACCTGCCTCATTCATGCCTGTCTGTGCATAACAGGT</b><br><b>TGAGGGTTCAGCTGTCTGATAAATAAGAGGGCAATGCGAGCAAGCT</b><br><b>GGTGAAGGTCTTCTTCTCTCTCGCC</b>                                                                                                                                                                                                                                                                                                                                                                                                                                                                                                                                                                                                                                                                                                                                                                                                  |
| ENSMUST000000052870.1 | 1             | 352       | ENSMUSG00000001034.1 | GAGCGAGCCCGGGGAACACTCATCACTGGGTTGGCAAGACTCAGG<br>AATCCCAAATTCCTCGAGGAGCGTGGCGCGGGGTGCCGGCCGCTC<br>GGTGAGTGCATCCCGGAGTCCAGCGCCCGCCCTCCCTTTCT<br>TCCGGGGCCGCGCCGCCCCCTGGATCCTGGGCCGTGGGGTTCT                                                                                                                                                                                                                                                                                                                                                                                                                                                                                                                                                                                                                                                                                                                                                                                                                                                                                                                                    |

|                      |   |                     |                     |                                                                                                                                                                                                                                                                                                                                                                                                                                                                                                                                                                                                                                                                                                                                                                                                                                                                                                                                                                                                                                                                                                                                                                                                                                                                                                                                                                                                                                                                                                                                                                                                                                                                                                                                                                                                                                                                                                                                                                                                                                                                                                                                                                                                                                                                                                                                                                                                                                        |
|----------------------|---|---------------------|---------------------|----------------------------------------------------------------------------------------------------------------------------------------------------------------------------------------------------------------------------------------------------------------------------------------------------------------------------------------------------------------------------------------------------------------------------------------------------------------------------------------------------------------------------------------------------------------------------------------------------------------------------------------------------------------------------------------------------------------------------------------------------------------------------------------------------------------------------------------------------------------------------------------------------------------------------------------------------------------------------------------------------------------------------------------------------------------------------------------------------------------------------------------------------------------------------------------------------------------------------------------------------------------------------------------------------------------------------------------------------------------------------------------------------------------------------------------------------------------------------------------------------------------------------------------------------------------------------------------------------------------------------------------------------------------------------------------------------------------------------------------------------------------------------------------------------------------------------------------------------------------------------------------------------------------------------------------------------------------------------------------------------------------------------------------------------------------------------------------------------------------------------------------------------------------------------------------------------------------------------------------------------------------------------------------------------------------------------------------------------------------------------------------------------------------------------------------|
| ENSMUST0000001063.1  | 1 | 184                 | ENSMUSG0000001036.1 | <p>CTGTGCCAGCGGTCCCTCTCGCCTGCTGCACAGGTCCTGCCTCCA<br/> AACCCACAGAGGCGGAACCTGAGAGGCCCTCAGGACGATCTTCTCAT<br/> CAGCGCTTCGTACAGACCATGGCCGAACCGTGAAGGAGGAGGACG<br/> GCGAAGATGGCTCTGGGGAGCCCCCTGGG<b>AGGGT</b>GAAAGCAGAAC<br/> CGTTCACACCGCTGCCTCTGTGGTGGCCAAGAACCCTGGCCCTGCTC<br/> AAAGCCCGCTCCTTCGACGTGACCTTTGACGTGGGGGACGAGTACG<br/> AGATCATCGAGACCATAGGAATGGGGCTACGGGGTGGTGTCTTC<br/> GGCGGCCCGCCCTCACGGGTGAGCTGGCTTCCTGA</p> <p>AAACGCTGCACAGGCTCGGGTGCCTCCCGCTTCTCCCGCTCGCCG<br/> GCGGCTGCAGCCTTGCACCTCGCGCTGGCCAGGAACGGAGGGCATGG<br/> CTGCCAGCTTCTGGGACCTGAGGCTTTGGAGGAGGAAATGACTGTG<br/> GAGGGCCATTTGTTCATCTGCATTTCTGCACGGAACCTCCT<b>A</b><br/> <b>GGGT</b>GACAGGCTTAGGGGACAGGAAAGTTCTCTTGAAGGGCTTCAC<br/> ATTTGTAACAAGAAGATAAAAAATGACAACTTCATCTATCAGACGG<br/> CAGATGAAAAACAATTGTGAACAATTACTCAGAGGCTGAAATCAAAG<br/> TCCGGGAGGCCACCTCCAATGACCCGTGGGGCCATCCAGCTCTCT<br/> GATGACTGAGATTGCTGACCTGACCTACAATGTGGTAGCGTTCTCG<br/> GAGATCATGAGCATGGTTTGAAGCGACTTAATGACCATGGCAAGA<br/> ACTGGCGGCATGTATAC</p>                                                                                                                                                                                                                                                                                                                                                                                                                                                                                                                                                                                                                                                                                                                                                                                                                                                                                                                                                                                                                                                                                                                                                                                                                                                                                                                                                                                                                                   |
| ENSMUST0000001155.1  | 4 | 61,782,811,<br>1206 | ENSMUSG0000001127.1 | <p>ACAAGCCCAAGATGGAGCGGTGGTGGTGGTAGCGGTGTGACAGGT<br/> GAGGGCAGGCCCGGT<b>AGGGT</b>TCGGGTTTTGGAGCGGCTCGCGGACC<br/> CGGGTATGAAGTCCAGACCGAAAGCTCAGCTCCAAGATGCTTCCGT<br/> CTGAATCTCAGCGTCTCCTCCGCCCGGAACCAAAGGAGTGGTTTGAC<br/> CAGGGCGAGACCGTCTGTCATCGACCCGTGGGAGTGGATGGAGGAGTG<br/> GGCCTGCAGGCTGCAGTGGTGGTTFCGCTGCTGCGCGTGGCAGTG<br/> CACCTGCACAGAGCTTGAAGCCCTTGGGGAGGGCGGGACGGAGCCA<br/> AATTGGGTCTGGGGTCTGGGGCTTGGGTGCGAAATCCAAGGTGAA<br/> TTCTTAAACCCCTTAAAAATGTCTAATGACGTTTCTCACGACGCTCC<br/> AGGAGATGCAGCTCTCTCCATGGTTCCTTATTGCCCTTCATATTC<br/> TACGCCACCTAGGAAGATGTCTGACGATTACCTCATTTATCCCTAGT<br/> TCACCCTAATCCCTTTCATGATTTCACAGTGCCTTTACACCAGTA<br/> ATCTGTTTGTGACCCCACTAGTATTACAGGTACAGTTTTTGGAAAC<br/> CCTTCCCAACCTCACCTCCATCTCTTCATCTGGATACCAATTGT<br/> CTTCCTTTGCCTTTCCTCTTGATAGTGTTTCTGATGAGCCATCAT<br/> TGCCACTGCATTTGATTTAGTGTGTAATGTGGTCTGTTATCCAGCT<br/> GTTTTTCACAGTCTGTAGTACTCTTATTACATCTCTCTTTAGTCT<br/> <b>AGGGT</b>ATGGCGAACCTCTGTGGACTCTAG<b>AGGGT</b>CTGGTGACCTCT<br/> ATTAGCTACCTGACAGTACCTTTGATTCTACCATTAGCCTTATAGC<br/> TTATGCTCTGGAATACCCACAGTGCCTTTAAGGTCAATGGTACTG<br/> TCTTCATTTCCCTTCAATCTAAAAACAAGGTCTGATGATCCTCCATT<br/> TTCTGTCGCCCTGTCTGTGCTGATTACCCATTCTGAACTTAAG</p> <p>CGCGCGCTGAGGGACGCG<b>AGGGT</b>GAGCGCACCTGGCCTCGGCGAC<br/> CGCGGGAGCGCGCGCGCTGTCCGCCCGGAGGATTGGGGTTCGCT<br/> GCCCCGCGCCGTCCCAACGCGTCCCGGAGTGCCGAGAAGCTGGGAG<br/> CGGCTTGGGC</p> <p>GAACACAGTGTAGCCAGCCGGTCCGGTACAATGTAGCGGCAGCCA<br/> GGTGACGGGAGTCTGGGAAGTACAGTGACAAGAGTGTAGCCCTCC<br/> TCATGC<b>AGGGT</b>GAAAGGGGAACATCTCAAGTAAGGGGACAGGAAGG<br/> AAGATCCAGTTTCCAGAGGTGGGATGCT</p> <p>CACTCATTTCACT<b>AGGGT</b>CCCCGGGAAGGGCTTGTGAGTATGGGTG<br/> GGTCCAAGGTAGGACAGTCAAAATGTTTCAGCATGGTAGGAAACAAC<br/> TCCGTGCCCGATAGTACAGCGTGTGTCGGGGGCAGGAAGGCAGACGT<br/> GAAGCCTAGACAGGTGTGGACACGCACATGTGTGTTCTGGCCACG<br/> TGTTTGTGGAAATTTGAGGCAAAATTTTGTGTTTGGTTCCTGGGGTA<br/> AAGTTTCCATTCACATTTTCCCTACTGTTAATTTTTTTTTTAA<br/> TTTTAAATTAACAAACTCTGACTAGAAAAAGCGCAATACCTTTGAA<br/> AGGACTGGGGCAGGAGTGGACAGCAG</p> <p>CACTCATTTCACT<b>AGGGT</b>CCCCGGGAAGGGCTTGTGAGTATGGGTG<br/> GGTCCAAGGTAGGACAGTCAAAATGTTTCAGCATGGTAGGAAACAAC<br/> TCCGTGCCCGATAGTACAGCGTGTGTCGGGGGCAGGAAGGCAGACGT<br/> GAAGCCTAGACAGGTGTGGACACGCACATGTGTGTTCTGGCCACG<br/> TGTTTGTGGAAATTTGAGGCAAAATTTTGTGTTTGGTTCCTGGGGTA<br/> AAGTTTCCATTCACATTTTCCCTACTGTTAATTTTTTTTTTAA<br/> TTTTAAATTAACAAACTCTGACTAGAAAAAGCGCAATACCTTTGAA<br/> AGGACTGGGGCAGGAGTGGACAGCAG</p> |
| ENSMUST0000001319.1  | 1 | 19                  | ENSMUSG0000001300.1 | <p>CGCGCGCTGAGGGACGCG<b>AGGGT</b>GAGCGCACCTGGCCTCGGCGAC<br/> CGCGGGAGCGCGCGCGCTGTCCGCCCGGAGGATTGGGGTTCGCT<br/> GCCCCGCGCCGTCCCAACGCGTCCCGGAGTGCCGAGAAGCTGGGAG<br/> CGGCTTGGGC</p>                                                                                                                                                                                                                                                                                                                                                                                                                                                                                                                                                                                                                                                                                                                                                                                                                                                                                                                                                                                                                                                                                                                                                                                                                                                                                                                                                                                                                                                                                                                                                                                                                                                                                                                                                                                                                                                                                                                                                                                                                                                                                                                                                                                                                                                      |
| ENSMUST0000001522.1  | 1 | 98                  | ENSMUSG0000001482.1 | <p>GAACACAGTGTAGCCAGCCGGTCCGGTACAATGTAGCGGCAGCCA<br/> GGTGACGGGAGTCTGGGAAGTACAGTGACAAGAGTGTAGCCCTCC<br/> TCATGC<b>AGGGT</b>GAAAGGGGAACATCTCAAGTAAGGGGACAGGAAGG<br/> AAGATCCAGTTTCCAGAGGTGGGATGCT</p>                                                                                                                                                                                                                                                                                                                                                                                                                                                                                                                                                                                                                                                                                                                                                                                                                                                                                                                                                                                                                                                                                                                                                                                                                                                                                                                                                                                                                                                                                                                                                                                                                                                                                                                                                                                                                                                                                                                                                                                                                                                                                                                                                                                                                                   |
| ENSMUST00000057054.1 | 1 | 14                  | ENSMUSG0000001493.1 | <p>CACTCATTTCACT<b>AGGGT</b>CCCCGGGAAGGGCTTGTGAGTATGGGTG<br/> GGTCCAAGGTAGGACAGTCAAAATGTTTCAGCATGGTAGGAAACAAC<br/> TCCGTGCCCGATAGTACAGCGTGTGTCGGGGGCAGGAAGGCAGACGT<br/> GAAGCCTAGACAGGTGTGGACACGCACATGTGTGTTCTGGCCACG<br/> TGTTTGTGGAAATTTGAGGCAAAATTTTGTGTTTGGTTCCTGGGGTA<br/> AAGTTTCCATTCACATTTTCCCTACTGTTAATTTTTTTTTTAA<br/> TTTTAAATTAACAAACTCTGACTAGAAAAAGCGCAATACCTTTGAA<br/> AGGACTGGGGCAGGAGTGGACAGCAG</p>                                                                                                                                                                                                                                                                                                                                                                                                                                                                                                                                                                                                                                                                                                                                                                                                                                                                                                                                                                                                                                                                                                                                                                                                                                                                                                                                                                                                                                                                                                                                                                                                                                                                                                                                                                                                                                                                                                                                                                                                                    |
| ENSMUST0000001533.1  | 1 | 14                  | ENSMUSG0000001493.1 | <p>CACTCATTTCACT<b>AGGGT</b>CCCCGGGAAGGGCTTGTGAGTATGGGTG<br/> GGTCCAAGGTAGGACAGTCAAAATGTTTCAGCATGGTAGGAAACAAC<br/> TCCGTGCCCGATAGTACAGCGTGTGTCGGGGGCAGGAAGGCAGACGT<br/> GAAGCCTAGACAGGTGTGGACACGCACATGTGTGTTCTGGCCACG<br/> TGTTTGTGGAAATTTGAGGCAAAATTTTGTGTTTGGTTCCTGGGGTA<br/> AAGTTTCCATTCACATTTTCCCTACTGTTAATTTTTTTTTTAA<br/> TTTTAAATTAACAAACTCTGACTAGAAAAAGCGCAATACCTTTGAA<br/> AGGACTGGGGCAGGAGTGGACAGCAG</p>                                                                                                                                                                                                                                                                                                                                                                                                                                                                                                                                                                                                                                                                                                                                                                                                                                                                                                                                                                                                                                                                                                                                                                                                                                                                                                                                                                                                                                                                                                                                                                                                                                                                                                                                                                                                                                                                                                                                                                                                                    |
| ENSMUST0000001558.1  | 1 | 0                   | ENSMUSG0000001517.1 | <p><b>AGGGT</b>CAAAGCTTGCATTTCTGATGGAGAGCGAAAGCACAGCCTC<br/> ACG</p>                                                                                                                                                                                                                                                                                                                                                                                                                                                                                                                                                                                                                                                                                                                                                                                                                                                                                                                                                                                                                                                                                                                                                                                                                                                                                                                                                                                                                                                                                                                                                                                                                                                                                                                                                                                                                                                                                                                                                                                                                                                                                                                                                                                                                                                                                                                                                                   |
| ENSMUST0000002070.1  | 1 | 24                  | ENSMUSG0000002017.1 | <p>TCCGGGAAGGAGCGCATGCGCT<b>AGGGT</b>ACGCGTTGCCGGCGAGAG<br/> GGCAGCCTGACGACTCGGAAATTTGAATACCACAGTAGCATGGAGT<br/> GTGACCTC</p>                                                                                                                                                                                                                                                                                                                                                                                                                                                                                                                                                                                                                                                                                                                                                                                                                                                                                                                                                                                                                                                                                                                                                                                                                                                                                                                                                                                                                                                                                                                                                                                                                                                                                                                                                                                                                                                                                                                                                                                                                                                                                                                                                                                                                                                                                                          |

|                      |   |      |                     |                                                                                                                                                                                                                                                                                                                                                                                                                                                                                                                                                                                                                                                                                                                                                                                                                                                                                                                                                                                                                                                                                                                                                              |
|----------------------|---|------|---------------------|--------------------------------------------------------------------------------------------------------------------------------------------------------------------------------------------------------------------------------------------------------------------------------------------------------------------------------------------------------------------------------------------------------------------------------------------------------------------------------------------------------------------------------------------------------------------------------------------------------------------------------------------------------------------------------------------------------------------------------------------------------------------------------------------------------------------------------------------------------------------------------------------------------------------------------------------------------------------------------------------------------------------------------------------------------------------------------------------------------------------------------------------------------------|
| ENSMUST00000056241.1 | 1 | 39   | ENSMUSG0000002059.1 | CGCTCGCAGAGTGGGACGGCGGGCCTCGCTGCGCGTCT <b>AGGGT</b> TGT<br>CGCCCCCTCCTCTCACCAGTTCGAGGGCGTCGGCAGTTGCTGCCCT<br>GCGCAAAGTGACCCCGTGTGGCGGGGGCGCCCCGAGCCCCCAGG<br>CCTCTCTGTATAGGTAGGGCCATCCCAGCCCCGAGTTGTCGTGGG<br>TCTCCGCGGGCCCCGGTTATCGTAGGGCTATCCGACCCCGTGTCA<br>TTGTAGGATCCGCGCGGGCCCCGGCTCCCCGGGACGCGACTCCCC<br>CCCACAAC <b>TAGCGGCGGGGATCTCCCCGCCCCGAGTGGTCTTC</b><br>GGGACGCCCCGGGCTCGGGT <b>GATTGTGGCTCTCCAGACCCGGG</b><br>TGATTGTCTCGTCCCCTTGGCCCCGGTGGT <b>CGTAGCGTCTCCAAG</b><br>GCCGAGGGCTCCACAGGCTCTCCGTGGCCCCGGT <b>GATTGTGGT</b><br>ACCCCGGGCCCGGATAAATCGTGGGTCTCCACGGGTCCCGGCCG<br>CCGGGGCGGATCAGGCTCTGCGCTTCCCGGGAGCCCCGAAGG<br>CCGCAGACAAG                                                                                                                                                                                                                                                                                                                                                                                                                                                                                                      |
| ENSMUST0000002198.1  | 1 | 1180 | ENSMUSG0000002129.1 | CTCTGGGTCGCCCATCTTGTCTATTGAGTTGGATACTTCGTGTGG<br>TGATCTTTAATCTTGTCTCGTCGCACCGGTTGTCCGCCACCGAGGTGGA<br>CTGGCAGCCCTGAGCGTCGCAGTCATGCAGCCGGACCCGTGCAGG<br>CGGTACCCCCCGCCGCCAGTAGCCACTGAGTCCAAACAGCCAAT<br>TGAAGAAGAAGCATCGTCAAAGGAGGATCCACCCCTTCCAAGCCA<br>GTGGTCGGCATTATTTACCTCCCCGGAGGTCAGGAACATCGTCG<br>ACAAGACTGCCAGTTTGTGGCCAGAAATGGCC <b>TGAATTTGAAGC</b><br>TAGGATTCGACAGAATGAGATCAACAACCCCAAGTCAATTTCTTA<br>AATCCCAATGACCCTTACCATGCCTACTACCGCCACAAGT <b>CAGCG</b><br>AGTTCAAGGAGGGGAAGGCTCAGAGCCCTCAGCTGCCATCCCCAA<br>GGTTATGCAGCAGCAGCAGCAAGCTACGCAACAGCAGCTGCCCCAG<br>AAGGTCCAAGCCAGGTGATCCAAGAGACCATAGTACCGAAGGAGC<br>CCCCCTCTGAGTTT <b>GAGTTCATCGCTGATCCCCCTCCATCTCAGC</b><br>CTTCGACCTGGATGTAGTGAAGCTGACAGCTCAGTTTGTGGCCAGG<br>AATGGGCGTCAGTTTCTGACCCAGCTGATGCAGAAAGAGCAGCGCA<br>ACTACCAAGTTT <b>GACTTCTCCGACCCAGCACAGCCTCTTCACTA</b><br>CTTCAACAAGCTGGTGGAGCAGTATACCAAGATCTTGATTCACCC<br>AAAGCTTATTTTCAAAGCTCAAGAAAGAGGCTGAAAATCCTCGAG<br>AAGTTTGGACCAGTTTGT <b>TACCGAGTAGAATGGGCCAAATTTCA</b><br>GGAACGTGAGAGGAAGAAGGAAGAAGAGGAGAAGAGAGAGCGGA<br>GTAGCTTATGCTCAGATTGACTGGCATGATTTTGTGGTGGTGGAGA<br>CAGTGGATTTTCAACCCAATGAGCAAGGAAACTTTCACCCCCAAC |
| ENSMUST0000002378.1  | 1 | 367  | ENSMUSG0000002307.1 | AGGGGAATTTGAACCCCATGGCCACCGATGACAGCATCATTTGTAC<br>TTGATGATGACGATGAAGATGAAGCTGCTGCTCAACCAGGGCCCTC<br>CAACCTACCCCCAATCTGCCTCAACAGGACCTGGTCTTGCCCTG<br>TCTCAACAGGCCACTGGTCTCTCCGAGCCCGTGTGGATGGAGGGA<br>GCAGTAACTCCGGTAGTAGGAAGTGCTACAAGTTGGATAATGAGAA<br>GCTCTTTGAAGAGTTCTTGAAGCTGTGTAAGACGGAGACATCAGAC<br>CACCTGAGGTGGTTCCGTCTCCACAAA <b>ACTGCAGCAGCGTGCCC</b><br>AGTCTGTGTTCTTGCCCTCTGCAGAGTTCTGCAACATCTCTC <b>AG</b><br><b>GGT</b> CTCGGCTCGGCTCGGAAGCGGGCCGCTAAGATCTATGTGTAC<br>ATTAACGAGCTCTGCACTGTTCTTAAAGCTCAC <b>TCCATCAAGAAGA</b><br>AGTTGAAC <b>TAGCTCCTGCAGCCTCAACGACCAGT</b> GAGGCGTCCGGG<br>CCCTAACCCCTCCACAGAGCCCTCTGACCTTACAACAC <b>TGAA</b><br>AACACTGCCTCTGAGGCCTCAAGGACTCGCGGTTCCCGGAGGCAGA<br>TCCAGCCCTGGAGCAGCTGCTGGCACTGTACGTAGCCGAGATTCCG<br>G                                                                                                                                                                                                                                                                                                                                                                                           |
| ENSMUST0000002452.1  | 1 | 46   | ENSMUSG0000002379.1 | GAGAGTTGACCTAGCCGGCTACCCTTGAGTTCCGCCAGACGCTTT <b>A</b><br><b>GGGT</b> CGGCCGAGCAAGCCAGCTAGGT                                                                                                                                                                                                                                                                                                                                                                                                                                                                                                                                                                                                                                                                                                                                                                                                                                                                                                                                                                                                                                                                 |
| ENSMUST0000002532.1  | 1 | 101  | ENSMUSG0000002458.1 | CTGCGCACTGCGCCCCCTCCCCGGCGACCAGCAGGACTTCGGAGCG<br>CGCGGGCGGGCTGACTCGGGGACCGCGGATCTGCCAGGATCCTAT<br>GCTGCAGT <b>GAGGGT</b> CCAGAGCTGCGCACCAAGAAATCTGGGCAACCC<br>CCTCCACTCACCC                                                                                                                                                                                                                                                                                                                                                                                                                                                                                                                                                                                                                                                                                                                                                                                                                                                                                                                                                                                 |
| ENSMUST0000002599.1  | 1 | 91   | ENSMUSG0000002524.1 | GCGACGGCGACTATAGCTCTCGTAAGT <b>GAGTCCCTCGCGGCCAGGG</b><br>GGCGGCCCTCAGCTCGGAGGACAGGTCAATGGCCAACAAGGAG <b>GAG</b><br><b>GGT</b> CGGAGCCAGCAGCAGCGGCTGCAGCGCGGGCGGGCGG <b>AGTGGT</b><br>GGCAGCAGGAGACAAATGGAAACCTCCACAGGGCACAGAATCCATC<br>AAG                                                                                                                                                                                                                                                                                                                                                                                                                                                                                                                                                                                                                                                                                                                                                                                                                                                                                                                  |
| ENSMUST0000003183.1  | 1 | 54   | ENSMUSG0000003099.1 | TCACTCGGCACTCCTTCGCGACGGTTCGGCC <b>TGGTCCCGGAGCGG</b><br>CCGTTGCC <b>AGGGT</b> GGGGT <b>CGCTTTGCGGC</b>                                                                                                                                                                                                                                                                                                                                                                                                                                                                                                                                                                                                                                                                                                                                                                                                                                                                                                                                                                                                                                                      |
| ENSMUST0000003356.1  | 1 | 53   | ENSMUSG0000003269.1 | TGGCTTCTTCTTCC <b>TGCGGACCTAGGCTTAAACCCGCTCCTTTCCGACC</b><br>CTGACCC <b>AGGGT</b> CCTGCTGCGCTAGCTTGTCTTCTACTGTGTACCC<br>AGATCCAGGCCAGTTGTCCGCTATGGCGGAACCAGAACCTCGTTT<br>CTTTTCCAAGAAATGCACCAAGATTCAGGACCCCAACTTTCCCA<br>TCATGATGGAGCCAGAATCTGGCCCCCTTACGAGAAATGCACCCCA<br>GGTT <b>TCATGCTAGGATCCCTACAGTGGTGGATCCAGAAGCCAGATC</b><br>CTGGTGTCTTTCCAAGATTTGCATCCGAGATCTAGGACCCCAAAGC                                                                                                                                                                                                                                                                                                                                                                                                                                                                                                                                                                                                                                                                                                                                                                          |

|                      |   |         |                     |                                                                                                                                                                                                                                                                                                                                                                                                                                                                                                                                                                                                                                                                                                                                                     |
|----------------------|---|---------|---------------------|-----------------------------------------------------------------------------------------------------------------------------------------------------------------------------------------------------------------------------------------------------------------------------------------------------------------------------------------------------------------------------------------------------------------------------------------------------------------------------------------------------------------------------------------------------------------------------------------------------------------------------------------------------------------------------------------------------------------------------------------------------|
| ENSMUST0000003435.1  | 1 | 229     | ENSMUSG0000003345.1 | CCTTTTGATGATGAAGCCATGAGTCCAAGGCCCTGTGTCCTTCCAA<br>GTAATGTTTCCAATATCCAAGCATCCTGTCTACTGTGTTGGGACC<br>AAGGAGCCAGGGCTTCCAATAAAGCATCTAAAATTCAGACTCAGG<br>AGTTTCTAATGTGGTGATGGGTCCAGAATCCAGGGACTGGTTGC<br>CTTTCAAGTAATTGGCCCAGAAATTCATCCTCAGACCTATGAGCTG<br>GGATTCTTAGGCATCTTGACACAAACTCAGGACTCAGTTTACTC<br>CCTCTCCTCAGACTTCTGGTACCATTCTCTTCTGGACAGGAATC<br>CAGGCCCCAGCCAAATCCTTCTCAGGATGCAGGATCCTGACC<br>CCCAGAACTAATTTCTTGACCCCTGGTCCCA                                                                                                                                                                                                                                                                                                                 |
| ENSMUST00000019676.1 | 1 | 5       | ENSMUSG0000003345.1 | CAGCTGGGCACCACAAGATTTAAGGCAGTGGGACCTGTGGCAGAA<br>TGCTCTCTCTCTGCAAGCAACCTGGAAGCCACCAAGATGAGCAC<br>CCCAGTCCGGCCTGTGAGCGTACCCGGGTGTCAATAGCCGGGACC<br>GAGGGGCCACCCGGGAGCAATGGTGTACTAGGCCGGGCGGAGTCA<br>GGTTTCGCACTCGGATCTCACGGCAGAGTCACCGTGGAGAGGCC <b>AG</b><br><b>GGT</b> ACCACAAACTT                                                                                                                                                                                                                                                                                                                                                                                                                                                                 |
| ENSMUST0000003777.1  | 1 | 93      | ENSMUSG0000003680.1 | GGCC <b>AGGGT</b> ACCACAAACTT<br>GAGAGGGAATTACCCTGAGCCGGTGAGTGAAGCAGCCGTCCTCC<br>CCAGCAGGCGCCCTCCAACCCCGAGTCTGCAGCAAGTGTAAATG<br><b>AGGGT</b> ATAGTATGTGCTGACCCCTGCTGGAGCCCTGGGATGCAAAGT<br>TCCACCGGGGCC                                                                                                                                                                                                                                                                                                                                                                                                                                                                                                                                            |
| ENSMUST0000003858.1  | 1 | 259     | ENSMUSG0000003760.1 | TCGCGGGCGGTGGGGGGCGGGTATGGCGCGCTGCGAAGCGCAGGG<br>CGGCTGGCACAAACGGCGGCCGAGGCCGGAGAAAAAGCTCGCC<br>ACCCCATCAGTCCCTTCTCAAGCTCCTAGAGACAACCTGGACTT<br>GGGGACCAGCGAGCACCCCCAGAGCACTAGAGGAGCCCTGTGCTC<br>TGCCCTGCCCTCACCTGCCCCACACGAGGCCCAGCGGCCCGGGCT<br>GCATCAAGTGGAGGAGGAGGAGCGGAG <b>AGGGT</b> GGCACCATGGGC<br>CCGGCCGTGCCCTCCATGCCCGGGGATGAAGACACTGTGCC                                                                                                                                                                                                                                                                                                                                                                                                |
| ENSMUST00000061869.1 | 2 | 395,420 | ENSMUSG0000003873.1 | ATGGACGGGTCCGGGGAGCAGCTTGGGAGCGCGGTGAGGCGGGAG<br>GCGGAGGACTAGGCCCGTCCAAGAACCCTAGGACCCCTCCGGCTT<br>TGGGCTCGGGCGGGAGCAGGCTGGGGCGCGGGATCCATTTCCACC<br>GGCTCATCCGCACCCCGAGAGCGGACATCCGCTGCGCGCCCCCG<br>GCAGGCCCGGGCTTGTGCTGGCGCCACTTCTGCTGGTGGCCTGG<br>GATGGGACAGAAGGCCAGCGCCACTTCTCCACCCCCAGCTGGGG<br>GTCTGTTTGCTTTTGGCATCTGCTCTCTGGGTTTGTGTGGAGCT<br>GGGATGCAGGCCGGTCCCGCCCCCTGTCCATCAGAAGCAGTAGCC<br>AGGCCTTCCATGCTACTTGTCACTACT <b>AGGGT</b> CCCCAGCTCTGTCT<br>CCCC <b>AGGGT</b> TATGAGCCTACCTATCCATCCCCCTGA                                                                                                                                                                                                                                        |
| ENSMUST0000004140.1  | 2 | 14,72   | ENSMUSG0000004038.1 | CTGCCCTCCGCTTT <b>AGGGT</b> CTGCTGCTCTGGTTACAGACCTAGGAA<br>GGGGAGTGCCTAATTTGGGATTTGGTGC <b>AGGGT</b> TGGGAGGACCCGCT<br>GTTTGTCTGCCACGTTTCTCTAGTAGTCTGTATAAAGTCACAA<br>CTCCAAACACACAGGTCAGTCTCTGTAAGCCAGTTTGTAGAAGACC<br>ACAGCACCAGCACC                                                                                                                                                                                                                                                                                                                                                                                                                                                                                                              |
| ENSMUST0000004200.1  | 1 | 41      | ENSMUSG0000004096.1 | CTTGGGCTTGGCGCCCCCGCGCCGAGATTTCTGGGAGCTA <b>AGGGT</b><br>CGCATTTGGTTCATGAGTGAGTTTCCGAAGGTGCTGCGTAGGACCC<br>CGCCAGAACTAAAAG                                                                                                                                                                                                                                                                                                                                                                                                                                                                                                                                                                                                                          |
| ENSMUST00000061351.1 | 1 | 303     | ENSMUSG0000004099.1 | ATGCGCGGGGAGCGGTTTGGCGCGGGCTGTGCTTCTGTCGCGCT<br>GCCCTTAGCTGTTGGCGCCAAAATGGGTGGGGCCGGGTGCTGGC<br>AAGCCATTGACTGGGAGCTTGGGAGCAAGGGGATCAGCCCTCT<br>GAAATAGAACAAAGCTTGGGACACCCCTCAGGGGTTCCCTCTTTGG<br>TCAGCCAGGCTCCTGGGTGTGCAGGAAGTGCCCTCTCCCGGCTG<br>TGGACACCTGAAGCCCCACTCCGCTCCAGCCTCCACTTCCGGTG<br>CCCTGCAGATCCCGCCGCGCCACCC <b>AGGGT</b> CCCTCCGCGGTT<br>CCCTGGCCCTGGTTTCAAGAGGCCCTCCTTCCAGCCCCGCTGTCA<br>AGTCTTAGGACCTTTTCTCTCTCATCCTGCCGGCCGGCCCTGGGC<br>AGCTTGAAGCCCTCGTGGGATTTTGTTTTGTCTTCTATCTAACGTA<br>AAGGAGCTCCTGCGATCCTGGAGCTATCAAAGAGACTGCTGCGGA<br>AAGAGCTGGTGTGCAGAAATGGGCCCTCCACTTTGGCAGTGACATA<br>ACTCTGTCCCGAGATCCCAAGAGCAATCGAGGAAACCTTTAACTCCA<br>TTCAAAGTGTATCAGGGGAAGGAAAGATGAATGGTAGTGAGAT<br>GTCTCGGCCCCCGCCCTATATTTTAGCCCTGTAA |
| ENSMUST0000004389.1  | 1 | 57      | ENSMUSG0000004278.1 | GTCCCGCTTCTTCTGCTCTCTGCGCTGCATCCGTGGGGGAGG<br>TGGCTGGCTGC <b>AGGGT</b> TCTCCGGATCTCTCTGTGTTCCCACTACT<br>CAAGCACCAGTGGCGTTCT                                                                                                                                                                                                                                                                                                                                                                                                                                                                                                                                                                                                                         |
| ENSMUST0000004569.1  | 1 | 251     | ENSMUSG0000004455.1 | ATCCGTGCGCCGCCCGAGGCTGGCTGAGGAGTCCGGCCATCTT<br>GTCTCTCTGCTGGTTCCTAGTGGCGAGAGGAGGAGGAAGCCCGGAG<br>CGGAGCGGGCGGCTGGGGGGGTGGACCCCGCGGCTGTGCTGT<br>CCACCGCCCGCCGCCACCACCCTCGTGGGGCTCGTGGCGTGAG<br>GAAGGAGGACGAGTGAACCCCGGGGCGAGCGGGCGGCGGCCG<br>TGCTGCTGCTGCTGCTGCGGG <b>AGGGT</b> CGCGCGGGGACGGCG                                                                                                                                                                                                                                                                                                                                                                                                                                                      |

|                       |   |     |                      |                                                                                                                                                                                                                                                                                                                                                                                                                                                                                                                                                                                                                                                                      |
|-----------------------|---|-----|----------------------|----------------------------------------------------------------------------------------------------------------------------------------------------------------------------------------------------------------------------------------------------------------------------------------------------------------------------------------------------------------------------------------------------------------------------------------------------------------------------------------------------------------------------------------------------------------------------------------------------------------------------------------------------------------------|
| ENSMUST00000004574.1  | 1 | 113 | ENSMUSG00000004460.1 | GAAGGGGCGCGCTACCTGTCTCCGCGGCCGGGCAAGAGAGAGACCC<br>CGGCGTGAGGCGGCCTCCCTGGGCGCGAAGGGCTGGTCAGCCGACG<br>CAGCGGCACCGGAGGCTGAG <b>AGGGT</b> AGGACCAGGGGACGCC                                                                                                                                                                                                                                                                                                                                                                                                                                                                                                               |
| ENSMUST00000004750.1  | 1 | 64  | ENSMUSG00000004631.1 | GGCAGGCCAAGAATGCTATTATTCGGTGGTGGGAGCTGGGAGACC<br>CTTGTGCTTGACCGGGA <b>AGGGT</b> CGGGGACACTCAAGATGAGCCC<br>CGGACCCTGGCACATTCTTACTGACAGG                                                                                                                                                                                                                                                                                                                                                                                                                                                                                                                               |
| ENSMUST000000059625.1 | 1 | 7   | ENSMUSG00000004947.1 | ATACTCG <b>AGGGT</b> TCTTCCAGGCCGAGCCGGAGCTGAGCCCGGAGG<br>TCGGCGGTCTCTCAACCTGTTCTTCTGCTTCCCTCAGACTCGGT<br>ACCTCGGAATCGGTGTGGCTGAGTCAGCAAGGCCTCAGATTTGCCG<br>GGTCTTGTGTGCTGTTCCCTATCAAGATGGGAGCTCAGACAAGTTA<br>TTGCTTCTGAGGATCTGGTGTCTTCATCAAGAAGGGACAGTTTGGT<br>GCCAGCTCTCAGTGAAGAGGAGGTCCCCCAGAGGTGCTGGGCAAT<br>GAACCTGAACCTGCAACCCAGCGTGGTGTGAAGTCTTCAGAGAAAG<br>CAGAAG                                                                                                                                                                                                                                                                                            |
| ENSMUST00000005072.1  | 1 | 79  | ENSMUSG00000004947.1 | ATGCGCAGCGCGGTGCTTGGAGGCTGCGACGCCGAGTTTCACTCCG<br>GCTGCTCCGGCTCGGAGTCGGAGACATACTCC <b>AGGGT</b> TCTTCCCA<br>GGCCGAGCCGGAGCTGAGCCCGGAGGTCGGCGGTCTCTCAACCTG<br>TTCCTTCTGCTTCCCTCAGACTCGGTACCTCGGAATCGGTGTGGCT<br>GAGTCAGCAAGGCCCTCAGATTTGCCGGGTCTTGTGTTGCTGTTCT<br>ATCAAGATGGGAGCTCAGACAAGTTATTGCTTCTGAGGATCTGGTG<br>CTTTCATCAAGAAGGGACAGTTTGGTGCAGCTCTTCAGTGAAGAG<br>GAGGTCCCCCAGAGGTGCTGGGCAATGAACCTGAACCTGCAACCCA<br>GCGTGGTGTGAAGTCTTCAGAGAAAGCAGAAG                                                                                                                                                                                                               |
| ENSMUST000000019213.1 | 1 | 7   | ENSMUSG00000004947.1 | ATACTCG <b>AGGGT</b> TCTTCCAGGCCGAGCCGGAGCTGAGCCCGGAGG<br>TCGGCGGTCTCTCAACCTGTTCTTCTGCTTCCCTCAGACTCGGT<br>ACCTCGGAATCGGTGTGGCTGAGTCAGCAAGGCCTCAGATTTGCCG<br>GGTCTTGTGTTGCTGTTCCCTATCAAGATGGGAGCTCAGACAAGTTA<br>TTGCTTCTGAGGATCTGGTGTCTTCATCAAGAAGGGACAGTTTGGT<br>GCCAGCTCTCAGTGAAGAGGAGGTCCCCCAGAGGTGCTGGGCAAT<br>GAACCTGAACCTGCAACCCAGCGTGGTGTGAAGTCTTCAGAGAAAG<br>CAGAAG                                                                                                                                                                                                                                                                                           |
| ENSMUST00000005185.1  | 1 | 17  | ENSMUSG00000005054.1 | CAAGCCAGGTTTTTCT <b>AGGGT</b> CCAGGCACCCAGGTCTCCTAGTTGG<br>ATCTGTCTTCAGCTTCTCCGTGCTACCCCGACTACTGCTGCCAAG                                                                                                                                                                                                                                                                                                                                                                                                                                                                                                                                                             |
| ENSMUST00000005371.1  | 1 | 102 | ENSMUSG00000005239.1 | AAGTTCTGTAGCTTCAGTTCATTGGGACCATCC <b>TGGCT</b> GATAGTAG<br>CGACTACAGTTAGGGGACCTAGCATT <b>CAGGCCCT</b> CATCTCCTCCT<br>CTTCCAGC <b>AGGGT</b> GTACCGCTTCTCCGAAGACTGG                                                                                                                                                                                                                                                                                                                                                                                                                                                                                                    |
| ENSMUST00000006025.1  | 1 | 583 | ENSMUSG00000005871.1 | AGGATGGGCTGCCTACCCCATCAGGATTTTATGTTTCTCTTGTGTC<br>TGACTTTGTGAATGGCTGCACCTTCTGTGGCATCGTAAATCTTCAGA<br>ACTACTTTGCCATAGATTAATTAATGAATGTGGTAGGGATGAAC<br>TCTGCTTCATTCATGATTTCTACTTCCGAAGGCCATATAGGCCATG<br>TCCAATCAGAAGCTAAAGTGCAGCATTACTCACACAATTTCTTTA<br>TCAGTGGTTGTATTCTGTAAGTTTGACATACAGGAGGAGTTAGGTC<br>ATCTTTAACCTTGAACAGTCTCACCAGATAGAGAGCTTACCTGTA<br>GCACTCAGATCTCTTCCGATGGGACTGAGGCTTCGCCTTTTGCTT<br>GAACCTGTCTTCTCTCAGCTCAGACCCATGTTCCATCCTCTTAG<br>GAACGTGTGCTGCTGGGACCATGGCGTTTGGAGCCCAAGCCTGCGA<br>ATAAGCACCCTCCTCCTGCTGAGAGAGCTTTGCTGCCTTTGTCTC<br>TTTCTTCAAACAAAACAAGCAGCTACTCCATTTCTAGTGGTGAAT<br>TTCAAATCCTTTTTAACTTATATAGGTTCA <b>AGGGT</b> AGCCAAAG |
| ENSMUST000000055687.1 | 1 | 29  | ENSMUSG00000006519.1 | AGAGTTGGACCGGGCTGCTGCGTGTGCGC <b>AGGGT</b> CCTCGTC                                                                                                                                                                                                                                                                                                                                                                                                                                                                                                                                                                                                                   |
| ENSMUST000000017604.1 | 1 | 48  | ENSMUSG00000006519.1 | GACTTGCAGAGTGGGCTGCAGAGTTGGACCGGGCTGCTGCGTGTGC<br>GC <b>AGGGT</b> CCTCGTC                                                                                                                                                                                                                                                                                                                                                                                                                                                                                                                                                                                            |
| ENSMUST000000027415.1 | 1 | 126 | ENSMUSG00000006576.1 | TGCGTGGGGCGCCTGGAGAGGGTCTTGGGGCAGGTGGGATCCTG<br>CGGGGACCCGAGCGCGGGGCCACGCTGGCCTGGTGGGGTCCCC<br>AAGAGGTCTCTGCAGCGCCCTTCTTCTCACCC <b>AGGGT</b> TTGGGT<br>CCATAGTGATTGAGAGACTCCTAAGTCTTCACTTTCAGCCCTGCC<br>GGTGGAGCAGCTGGGTGTGGGTGCACTGGGCTGTGGGAAGCCG<br>TGTTGGAGCGAACTAA <b>AGGGT</b> CTGATCGGACTTGGGTTGCGCCGAA<br>GGGACAGCCCTGAGTCTGGAGGAGAGAATCCCCGACCGTGAGACCC<br>GCTTCCCTTGGCCCGGCCCTCCAGTTCGCCAGCGACGGCTGC<br>TTCTTGGTCCCCGACGCAACC                                                                                                                                                                                                                              |
| ENSMUST00000007257.1  | 1 | 63  | ENSMUSG00000007041.1 | GGCCTCGTGTGCGTTCGGTGGGCGGCAGCCAGGCC <b>AGGGT</b> TT<br>TCCGTACAGCCTTACTGCCACACCCAGTGTGAGGAGGCTGCTCG<br>GAGCCG                                                                                                                                                                                                                                                                                                                                                                                                                                                                                                                                                        |
| ENSMUST00000007266.1  | 1 | 40  | ENSMUSG00000007050.1 | GGCCTCGTGTGCGTTCGGTGGGCGGCAGCCAGGCC <b>AGGGT</b> TT<br>TCCGTACAGCCTTACTGCCACACCCAGTGTGAGGAGGCTGCTCG<br>GAGCCG                                                                                                                                                                                                                                                                                                                                                                                                                                                                                                                                                        |
| ENSMUST00000009003.1  | 1 | 29  | ENSMUSG00000008859.1 | CGGCGGTGCTGCAGAGCGCGGGAGC <b>AGGGT</b> GGGTCCTCCTAGA<br>GCGGAGCGCCGAGTCTCTCTCTCCCGCCGCCAGGCCCGCCG<br>CCGCTGCCCGCCGCGCTCCGGACTCCTCTTGGCCGCCCGCGCGG<br>AACTCCGAGCGGGTCCGATCGGCGCAGCCGAGGCCAAAGAGCCCG<br>CGGTCGAGCGGCTCGCGTGCAGATTTTCTTAACTCTCTGAGGA                                                                                                                                                                                                                                                                                                                                                                                                                    |

| ENSMUST00000010051.1 | 1 | 55         | ENSMUSG0000009907.1  | CTCTGGAAAACAGG<br>GCCAGAGGCGGGACCAGAGCCCTAAGGGGCTCGAAATTACGGAAGT<br>TTTGTGCGC <b>AGGGT</b> CGGGTGGCTGCTGGAGTTCCTGCTGGATTAC<br>GGCTCCGAGCTGGGGCTGCCGCTGGGGGGTCTCAGAGCCGCCAG<br>CCTCCGCACGGTTTTCGGTGGTGACCCGGCGCGACTCCAGCGCGC<br>TGCTGCGGGCCTTGCTGTAGTAGGGGACCCCTCGGATCTCCACC                                                                                                                                                                                                                                                                                                                                                                                                                                                                                                                                                                                                                                                                                                                                                                                                                                                                 |
|----------------------|---|------------|----------------------|---------------------------------------------------------------------------------------------------------------------------------------------------------------------------------------------------------------------------------------------------------------------------------------------------------------------------------------------------------------------------------------------------------------------------------------------------------------------------------------------------------------------------------------------------------------------------------------------------------------------------------------------------------------------------------------------------------------------------------------------------------------------------------------------------------------------------------------------------------------------------------------------------------------------------------------------------------------------------------------------------------------------------------------------------------------------------------------------------------------------------------------------|
| ENSMUST00000061164.1 | 3 | 11,300,494 | ENSMUSG00000010110.1 | CAC <b>TTTTAA</b> C <b>AGGGT</b> TTTTTTCGCCCTCCCCCTCCGCCCTCCGAAGTG<br>TGTCCACCTCTGGAGATCGGTTGCTGTTTTCTGTGAGAGGGGGAAG<br>GAAATCACGTATACCAAAGGCAGGATTGAGACCTGGGCTAACTGCA<br>AAGGTCTGCCTGGAAGTTCAGGGCCGAGGACCAGGCTGTGGCTGT<br>TTTCTCGACTTTAGGGGCCCGGCCGAGCTCTGGCAGTCAGAGCC<br>AAGTCGGAAGGAGACTCTGAGGAGGCTTCGCCCTGGGCCCTGGAGGA<br>AGCTGACCGTTCTCGCCGTGTCC <b>AGGGT</b> GCAGGATCTGCGGGTGGC<br>CGTGGCTCCAAGTCTGTCAAATACGGGAAAGGGCTGGGGATT<br>GCTAGTTGAGGGGACCGTTTGGGAAAGAGGCTGTCTGGAGAATGA<br>CATTCCTCTCCACAACAGTCTGAGGTTATGCGACTCGATGATCC<br>CGCGAAACGCTACGGATCTAAGAACACGGATC <b>AGGGT</b> GTCTACCT<br>GGGTCTCAAAGACACAGGTTCTGTCCCTGCAACTGCTATCAGT<br>AGCAGCAGTGACAGCACTCTTTGCCACTCCGGTGGCCCTGGTCC<br>CCTCCCTCCCGACACC                                                                                                                                                                                                                                                                                                                                                                                                                           |
| ENSMUST00000010254.1 | 1 | 193        | ENSMUSG00000010110.1 | GAGTTAGGAGTACGTCTAGGTGACGTGGCGGCTCCTGTCTTTGGT<br>CCGGCTTCCACTGCTTACAGTCTTCGAGGAGGGCGCAACGATCT<br>GGGAAGAGTGGCGGTGGTGGTGGCGGTAGGAAACAGAAGAGTCTGA<br>GGTTATGCGACTCGATGATCCCGGAAACGCTACGGATCTAAGAA<br>CACGGATC <b>AGGGT</b> GTCTACCTGGGTCTCTCAAAGACACAGGTTCTG<br>TCCCTGCAACTGCTATCAGTAGCAGCAGTGACAGCACTCCTTTG<br>CCACTCCGGTGGCCCTGGTCCCTCCCTCCCGACACC                                                                                                                                                                                                                                                                                                                                                                                                                                                                                                                                                                                                                                                                                                                                                                                          |
| ENSMUST00000010278.1 | 1 | 28         | ENSMUSG00000010134.1 | ACGTGTGCGGTCCCCTCCGGCGCCGAGT <b>AGGGT</b> CTCTCGTCGAGTC<br>TGGGTCTAGGTTAGATTGGAATCGTGGAG                                                                                                                                                                                                                                                                                                                                                                                                                                                                                                                                                                                                                                                                                                                                                                                                                                                                                                                                                                                                                                                    |
| ENSMUST00000011240.1 | 2 | 27,81      | ENSMUSG00000011096.1 | GGCGCGTGTGTGAGCTGGGGTTTGGGG <b>AGGGT</b> CTGGCCTTCCTGAG<br>GTTGAGGGGCGAGTGGGAGGGCGAGCCCCGTGGGA <b>AGGGT</b> ATGGAC<br>TGCATAGGT <b>CAGGGGGCAGT</b> GATCGTCTCGACTCCTGGCCGAC<br>TGCTGAAAGAGCTCACGCTCAACCCATGTGTCTGA                                                                                                                                                                                                                                                                                                                                                                                                                                                                                                                                                                                                                                                                                                                                                                                                                                                                                                                           |
| ENSMUST00000012566.1 | 1 | 12         | ENSMUSG00000012422.1 | CCCGGCCCGGA <b>AGGGT</b> GATGTGGCTGGACCAGCACCGGCTCACTA<br>TG                                                                                                                                                                                                                                                                                                                                                                                                                                                                                                                                                                                                                                                                                                                                                                                                                                                                                                                                                                                                                                                                                |
| ENSMUST00000015712.1 | 1 | 108        | ENSMUSG00000015568.1 | AAAGGTTGACTTGCCTACGGCGCTCCACCGGCTCCAGTCTCTT<br>GCGCTCCTGCTCAACCCGCTCTGACTGCCCCACGCCCGTAGTT<br>CCAGCAGCAAAGCAGA <b>AGGGT</b> GCACCGGGAG                                                                                                                                                                                                                                                                                                                                                                                                                                                                                                                                                                                                                                                                                                                                                                                                                                                                                                                                                                                                      |
| ENSMUST00000061747.1 | 1 | 180        | ENSMUSG00000015568.1 | AGACTCTCGATTTCTCCTCTACTCCTCCTCCGAGGAATTCTGCC<br>CTTGTAACTGTTCTGCCCTCCCTTTAAAGGTTGACTTGCCCTACG<br>GCGCTCCACCGGCTCCAGTCTCTTGCCTCCTGCTCAACCCGC<br>TCTGACTGCCCCACGCCGCTAGTTCCAGCAGCAAAGCAGA <b>AGGG</b><br><b>T</b> GCACCGGGAG                                                                                                                                                                                                                                                                                                                                                                                                                                                                                                                                                                                                                                                                                                                                                                                                                                                                                                                  |
| ENSMUST00000056450.1 | 2 | 371,788    | ENSMUSG00000015697.1 | CGAACAGTATCGGGGCAAGAACCCTCTATTAGTTCCACTTCTGTAT<br>GACTTCCGGAGGATGACAGCACGGCGCAGAGTTAACCCGAAAAATGG<br>GCTTTCATGTAATCTATAAGACACCCTGTGGTCTCTGCCCTCGGAC<br>GATGCAGGAGATAGAGCGCTACCTTTTTGAGACTGGCTGTGACTTT<br>CTGTTCCTGGAGATGTTCTGTTTGGATCCATATGTTCTGTGGACA<br>GAAAGTTTCAACCCTTTAAAGCCTTTTACTATATTTTGGACATCAC<br>CTATGGCAAGGAAGATGTTCCCTGTCTGTTAATGAGATTGAC<br>ACAACCTCCCCACCCAGGTGGCCTACAGCAAGGAACGCATTCTG<br>GCA <b>AGGGT</b> GTTTTCATTAACACAGGCCCTGAATTTCTGGTTGGCTG<br>TGACTGCAAGGATGGGTGTCTGGGATAAGTGAGTTGGTGGGGTGTAC<br>AGGCATTGCTGTCTCTGCCCTCAGGTTTATTACAGTTGCTTTTCTT<br>TCTTTTTTATTTGTATTGCTTTCCCTGTTTCTTTTACTCTCTCT<br>TTCAGCTAGAGTTCTGCTAAGGTCATTATGAAATACAGATACAGAA<br>ACTGGGTACAGTGGCACATACCTGTAACCTCAGAATTTGAAATCA<br>GCATTGTGGCAGTTTCATCTTGAGTTCTGGGCCAGCCTAGGCTTCA<br>TAATAACTTTGAAGCTAGGCTGAGCTAGCTACGCAGTGAGATCTTA<br>TTGAAAGAGAGAGAGAGAGGGAGAATGAATGAACATGAGATAGG<br>GAGACC <b>AGGGT</b> CTGATCGTCTTAAATGTCCCCAGGAGTAAACCTGG<br>AAATGTAGGGTTATGTTCTGTTCTCTCTCCTCTGCTGTGTTCTG<br>TCTCCCTTAAACCTTTTACCTTTGTTTACCATTTAGATTCTACT<br>TTATTCTCACTGTATCTTACTCATGCTTTTCTCACTACCTTTACC<br>TTATCCCCATCCTCTGTTATTGGTTGATTTTGGCCCTAAGGTAAGG |
| ENSMUST00000015893.1 | 1 | 259        | ENSMUSG00000015749.1 | AGTCTCGCAGCAGCCATTGAAGGGGAAGGAAC <b>T</b> CGGGCGCGCGCG<br>TGCTCTCTCCCTCACTCTCTCTGTGAAAGTGTGCGGTGCCCG<br>AGTGTGCGCGCGGGTGTGTGGACTCGGAGGTGGGGCAGCCGAG<br>TTAGTCCCAAGTCTGTCGGACTCCATTTGCTATTCTTTCTTTCTCT                                                                                                                                                                                                                                                                                                                                                                                                                                                                                                                                                                                                                                                                                                                                                                                                                                                                                                                                       |

|                      |   |         |                      |                                                                                                                                                                                                                                                                                                                                                                                                                                                                                                                                                                                                                                                                                                                                                                                                                                                                                                                                                                                                                                                                                                                                                                                                                                                                                                                                             |
|----------------------|---|---------|----------------------|---------------------------------------------------------------------------------------------------------------------------------------------------------------------------------------------------------------------------------------------------------------------------------------------------------------------------------------------------------------------------------------------------------------------------------------------------------------------------------------------------------------------------------------------------------------------------------------------------------------------------------------------------------------------------------------------------------------------------------------------------------------------------------------------------------------------------------------------------------------------------------------------------------------------------------------------------------------------------------------------------------------------------------------------------------------------------------------------------------------------------------------------------------------------------------------------------------------------------------------------------------------------------------------------------------------------------------------------|
| ENSMUST00000015934.1 | 1 | 95      | ENSMUSG00000015790.1 | CCCACACCCGTGTGGTAGTGGGCGTTTCGTCTTTGCGTCTCTTTTCA<br>TTCATCTCCAGACCTTTAGAGGTTTTTT <b>AGGGT</b> TGGGGATAGTGG<br>GGAGGGCAGGCGAGGGGAAAGGAGGAGGAC                                                                                                                                                                                                                                                                                                                                                                                                                                                                                                                                                                                                                                                                                                                                                                                                                                                                                                                                                                                                                                                                                                                                                                                                 |
| ENSMUST00000016639.1 | 1 | 203     | ENSMUSG00000016495.1 | GCCCTACTCTTCCGGTCACGGTTCTTCCGACCTTGC GGGTGTG<br>GGCAGTAGTCTCAAGCTGGGGTGTGGCCCAAGAATGCAAGCACAT<br>CAG <b>AGGGT</b> TGGTTCGTCCATGATCGGAGATGCCCATCTGACGCCGA<br>GCCACCAGTGAGACAGAGCGCCGTCCCGGAAGGAAGCAGATTCT<br>CGTCCCGGAAGTGCTCAAAG                                                                                                                                                                                                                                                                                                                                                                                                                                                                                                                                                                                                                                                                                                                                                                                                                                                                                                                                                                                                                                                                                                            |
| ENSMUST00000016763.1 | 2 | 239,630 | ENSMUSG00000016619.1 | GCTCTGCCGAAGCAAGGTACTGTCCCTGCGCTGATCGCTCTGGAGC<br>TCTGGCTAGAGGCCCTCTGCTGGGGTACCGTCCCCGCACCGTGTG<br>CGTGAGATCTCCAGAGGGACACTCTGTTTGCCTTCTATATTTAAC<br>CGTGTACCTGAGATTTCCCCGCACACATCCAAAGTCCAAGTCCAAG<br>AGAGCAAGGCCCAAGAAG <b>AGGGT</b> CAAG                                                                                                                                                                                                                                                                                                                                                                                                                                                                                                                                                                                                                                                                                                                                                                                                                                                                                                                                                                                                                                                                                                  |
| ENSMUST00000039852.1 | 2 | 16,877  | ENSMUSG00000017119.1 | GCTTTCCAAAGATGAAACAAGGGTGTGCATTTTCCAGAACGACTG<br>TGTAGCCACGTGCCCTGTGGGGTGCACACGTGTCAAACCTCACAGGCA<br>CTTTCCAGGAACCTGTCTCTTCATGGTGGCAGTGTCTGTGAGC<br>TGCCCATGCCCTTGAATATTTACCAAAAAGATAAAAGCAAAAAAGAT<br>CATGACTGGACTGCCCTTCTAGAGCTCCCGGCCAATTTCAAGTGT<br>AATTAGT <b>GAGGGT</b> GGCTTGCTTTTTTTTCTAACATCCAGCAATTT<br>GCTGTAAAGACTATCACCTTTTGAAACAAGAATTACAGGGGAGAT<br>GTGTGGGGTGTGACTGTAACCTCGGTGCTTTGCTTTATGCTTTAGG<br>AGCTAGCTCATTGCATCTGACCTGAGTATGGGAATCACTATGAAGT<br>CTGAGTGTACAGGGAGGCCCGGAGGGCAGTCTGTTCTCTTCC<br>ACTGTGTGTAGCTGGTTCCAACCCATGGCTTAAACTTCATTTAT<br>GGTTTAAACGTGTAGAACTTGCATCTTGTCTGTTTAAATGTGAAC<br>GAGGTGTGTATCTCCAGTTTGAAAATCTCACGTTGTGTCTTACAT<br>TGCCGAAGGAAGTGTGTCTCTGTGGT <b>AGGGT</b> GCATCTGGCA<br>GATGCTAAGCCTGGGCCCTCCACACTATAGCTCACACTATGACAC<br>ATTCCAGCCCTGCC                                                                                                                                                                                                                                                                                                                                                                                                                                                                                                                                                |
| ENSMUST00000017365.1 | 1 | 120     | ENSMUSG00000017221.1 | AGTAGTCTGTACAA <b>AGGGT</b> GGGAATCGCTCCCTGAGGCCGAATA<br>TGAGCGCAAGGTAGTGCCCAAAGCAGTTGCAAAACGAGGTCTCATC<br>CCTCCCTCAGCCTTCTGCCATGGAAGTCTCCAGTTCCGGTAAATA<br>AGAGACTTGTGTAAGAAGAACTACCAATTCAGCATGCATTCGGGA<br>ACGAAAGGCCTTCTCCACAGCATCTTTGAAAGTGTAGTCTTACG<br>GGAAAAGAGCTTCTCACACCGGAAGCAGGCACGAGTACACAGGAA<br>CCCAGTCCGTACAGCGGAGACCTCTCGCAGTTATGCGTCTTAGCT<br>GCTATGAATCGCAGCGTCTGTGTTCGTGTTTTGTGCACAGAAAAT<br>AGACTAAAAGGAGCTGTGGGTTCAGGAAGACTACAATTCGGTCC<br>AGCCCGCGATTTCTCGGAAAAAACAACAAACCAACCACTTGAAC<br>GTGCTGGGGAGTTGCTGGGGAGTTGATGAGCCAGCGTCTGCCAAA<br>TTTTACAGCTCTTAAGAAGGAAGATTGCATTTTCCAGGCTGACCTAG<br>AACTTTGGACTTCCATTACCATCTGCATCAACTTCTGAGTAACT<br>GGGACTACAGCTCCAGCCAGACAGCATGGAACCAAGTTACACTTA<br>AATGTGACTTTTAAAAATGAACTCAAAGCTTTCTGGTTTCGGATC<br>CAGAAAATACAACCTGGGCTGATGTTGAAGCTATGGTAAAAGTTTC<br>ATTTGATCTGAATACTATCCAGATAAAATACCTGGATGAGGAGAAC<br>GAGGAGATATCCATCAATAGTCAAGGTGAATATGAAGAAGCACTTA<br>GATGGCTAACATTAAGCAAGGAAATCAGCTACAGATGCAAGTCCAC<br>GA <b>AGGGT</b> TACCATGTTGTAGATGAAGCACTCCCCAAAATGTGTAG<br>AAAACCAAGCGGCTGCCAGGACAGGGAAGAAGCCACTTGCACATTA<br>TCTTCACTGGTGAGAGTCTTGGGATCAGACATGAAGACCACAGAG<br>CTGGCATTTCCAGAAGCCCCAGCGCCGGGAAGGAGTTTGCAGCTG<br>CTCGTTCATCGTGC GGCCGACGCGAGCCCGCTGGTGTGCAGGC<br>CCGGCTCTGTGCCTGGTCTCTGGTGT <b>AGGGT</b> TTACGCGAGGCCCC<br>TGCTTCGGTCCCCGACTAGGCCCTGACCCCGGGCGCC |
| ENSMUST00000017384.1 | 1 | 126     | ENSMUSG00000017240.1 | AAAATTAGCTCCACAGTAAGTAAAATAGATTGTTCTCTCTTTTCA<br>GGTAGTTGTACCTCCTTTTCCAGGCTCCATGGAAGCCATCACCGAC<br>AGACGTCATCTCGCTCTCCAGAAAACGTGCCG <b>AGGGT</b> GCAGGCC<br>CGCCCCGGAAAGAAGGGCGGCCCTCCCTGGACGTGAAGCAGCT<br>GGACTCCGGAGTCTCGAGCTTCCGGCAGCCTCCGCGGGCGGCT<br>GGTGCCTAAGGAGCTGACCAGCGGTGGCCGTTCTCCGTAAG                                                                                                                                                                                                                                                                                                                                                                                                                                                                                                                                                                                                                                                                                                                                                                                                                                                                                                                                                                                                                                         |
| ENSMUST00000017904.1 | 1 | 90      | ENSMUSG00000017760.1 | AGAGCTGATCTAAGAGGTGGCTATAAAGCCCTGGCCGGCTGCGGCC<br>CACCAGACGGTCCC GGGAATTCGGAAC TGCTCGATGCCAGAT <b>AG</b><br><b>GGT</b> TCAACCAAGTAGGGCTTGGGGACCAC TGGGGACCGTGCCTCCG<br>CTTCTGGTTGACCTTCCCGGGGCACACGGTTGTGGTGGCGTGTGAT<br>AGCGAAGACCAACTGTGGCCAAGGCTGACCAAGTCAAGCAGTGAA<br>AACTCGGGTACAGCGCCAGACTGGCGGGATCCAGAGCGGTACGGC<br>CAAGAC                                                                                                                                                                                                                                                                                                                                                                                                                                                                                                                                                                                                                                                                                                                                                                                                                                                                                                                                                                                                           |
| ENSMUST00000017975.1 | 2 | 126,235 | ENSMUSG00000017831.1 | GTCCCTCGGAACCTCGAGCGCGGACTCTGGAGGAGGAGGAAAGG<br>AAGGCCGAACCGAGAGGGCGGAGACGCGAGCCCGGACGGGGCGGCGG                                                                                                                                                                                                                                                                                                                                                                                                                                                                                                                                                                                                                                                                                                                                                                                                                                                                                                                                                                                                                                                                                                                                                                                                                                             |

|                      |   |     |                      |                                                                                                                                                                                                                                                                                                                                                                                                                                                                                                                                                                                                                                                                                                                                                                                                                                                                                                                                                                                                                                                                                                                    |
|----------------------|---|-----|----------------------|--------------------------------------------------------------------------------------------------------------------------------------------------------------------------------------------------------------------------------------------------------------------------------------------------------------------------------------------------------------------------------------------------------------------------------------------------------------------------------------------------------------------------------------------------------------------------------------------------------------------------------------------------------------------------------------------------------------------------------------------------------------------------------------------------------------------------------------------------------------------------------------------------------------------------------------------------------------------------------------------------------------------------------------------------------------------------------------------------------------------|
| ENSMUST00000018005.1 | 1 | 114 | ENSMUSG00000017861.1 | ACGGCGGGCGGGCGCTCATAGTCCCAGCGCCGGCC <b>AGGGT</b> GAGAAGAA<br>GGAGCGAGCAGGCGACGCCCGCTGACGCCGGCGCATCCGATC<br>TCCGGGCGGGCGGGCGGTGCGTGGCCTCGCTGCCGGGAGACGCG<br>GCC <b>AGGGT</b> AATTTCTCCAGAAAGAAAACAAAATTAATGCCTTGCA<br>TCCTGGAAGTTCATTTAGGAATCTGAAATTAGGACTTCTTTAAAA<br>TTTGGAC                                                                                                                                                                                                                                                                                                                                                                                                                                                                                                                                                                                                                                                                                                                                                                                                                                      |
| ENSMUST00000018050.1 | 1 | 530 | ENSMUSG00000017906.1 | CAGACCTGCAGACACGCTGACGCCCTGAGAGCACCCCTGGGGCCCG<br>GAGCGGCTCGAGCAGCCTGAGTCCCTGACCCCGCCCGCTCCCCT<br>CCGGCTCGCCGGCGGGCGTA <b>AGGGT</b> GCGGGCGGGTCCGGGCGG<br>GGGATGTCTCGGCGACGCGCTGC                                                                                                                                                                                                                                                                                                                                                                                                                                                                                                                                                                                                                                                                                                                                                                                                                                                                                                                                  |
| ENSMUST00000040191.1 | 1 | 57  | ENSMUSG00000018166.1 | CAAGCGGCAGATTCCAAGCCGGTTCCAGCTCAACCTGGACAAGACC<br>ATAGAGAGTTGCAAAGCACAGCTAGGCATAAATGAGATCTCAGAGG<br>ATGTTTATACAGCCGTGGAGCACAGCGATTCCGAGACTCCGAAAA<br>GTCGGAGAGCAGCGACAGCGAGTACGTCAGCGATGAGGAACAGAAG<br>CCCAAGAATGAGCCCGAGGACCCCGAGGACAAAGAGGGGAGTCGGG<br>TGGACAAAGAGGCCCTGCCATCAAAGGAAGCCAAACCCACAAA<br>CCAGTAGAGGTCAAAGAGGAAGCAAGAGCAACTCTCCTGATAGC<br>GAGAAGCCGACCCACACCCGCCAAGGACAAGGCCAGCCAGAGC<br>CTGAGAAGGACTTTGTAGAGAAAGCAAAGCCATCACCTCATCCAC<br>AAAGGACAACTGAAAGGAAAGGATGAAACGGATTCTCCACAGTG<br>CACTTGGGCTTGGAATTCGACTCGGAGAGCGAACTTGTCTAGACT<br>TAGGAGAGGATCCTTCTGGGAGGG <b>AGGGT</b> CGAAAAACAAGAAAGA<br>TCCCAAGGTGCCGTGCGCTAAGCAAGACGCTATAGGTAACCCGCCA<br>CCGTCGTCCACTTCGGCGGGCAACAGTCTCCCCAGAGACACCCG<br>TACTCACCCGCTCAGCCACCCAAGCACCCGCGGTGGGGTCCCGT<br>GGCCCGCCACCACCAGCACGATGTCTACCGTCACAGTCACGGCA<br>CCGGCCACCGCCGTACGGGAAGCCGGTGAAGAGCAGAGGCCGC<br>TCTTACCGAAGGAGACTGTCCAGCTGTGCAGCGGGTCTGTGGAA<br>CGCATCAAGTAAGTTTCAAACGCTCTCCAAAAGTGGCACATGCAG<br>AAGATACAGCGCCAGCAGCAGCAGCAACAACAACAGCAGAGCC<br>AACAGCAGAGCCAGCAGCAGCAGCTCAGTCTTCCAGGGGACGAG<br>ATATCAGACCAGACAGGCTGTGAAAGCTGTCCAGCAGAAGGAGGTC |
| ENSMUST00000018441.1 | 1 | 16  | ENSMUSG00000018297.1 | GCACCGTGAGACACTGGGACCACAGCTGCTGCTCAACTGGGGAGTA<br>CAATTTGCCA <b>AGGGT</b> ATGATATTACTCGAGGAACACAGATGCTG                                                                                                                                                                                                                                                                                                                                                                                                                                                                                                                                                                                                                                                                                                                                                                                                                                                                                                                                                                                                            |
| ENSMUST00000018506.1 | 1 | 8   | ENSMUSG00000018362.1 | AGTGCTGCTCCGGTAC <b>AGGGT</b> CGCGCTCGGCTCTGTCTTAAGGCT<br>CTCCTCGGTGTCACGGCACCCCTTTCTTGTCTTGCAGCGATCC<br>TACTGCCAGAAATTCGCC                                                                                                                                                                                                                                                                                                                                                                                                                                                                                                                                                                                                                                                                                                                                                                                                                                                                                                                                                                                        |
| ENSMUST00000018711.1 | 1 | 18  | ENSMUSG00000018567.1 | GGGCTGA <b>AGGGT</b> AGCAGACGTTTCCACAGCCGCCAGCCGAGCTT<br>GAGTGTCTGCACCACCTTTCGTGGAAATCTGAGCCGGGTGTACAG<br>CTTCTCTCTTGTCTTCTGCAGCC                                                                                                                                                                                                                                                                                                                                                                                                                                                                                                                                                                                                                                                                                                                                                                                                                                                                                                                                                                                  |
| ENSMUST00000018713.1 | 1 | 383 | ENSMUSG00000018569.1 | ACTTTGTACTGTGGGAA <b>AGGGT</b> TTTTTCAGTTCACTCGAAACAACAG<br>CAACCTTATCTGCGATGTATATGTGTAACCCACAAGTTGATTTCCA<br>AAGCAGTTACGCTGAAGGCGTAAGAGGACCAGGCTACGGGTTGCCG<br>TAGCAAGCTGAGCTAGTGGCGTATGTTAGCAGGCGGGGCGGTCCG<br>ATGGTCGGGGCGGGGTTGATGAATAGGGAAGTGGCGCAAATTCGT<br>GGATCGCTCCGCCAAGTCTGTTCTGTCGAAGCCGCTCCGCCCGCG<br>CCCCGTGCCGGCCCCCCCCCTGGGTTCCCTCAGCCAGCTCGGTC<br>CAGCCCGGTTCTCGGGAGA                                                                                                                                                                                                                                                                                                                                                                                                                                                                                                                                                                                                                                                                                                                             |
| ENSMUST00000019117.1 | 1 | 31  | ENSMUSG00000018973.1 | GCCCCACCTGCCGCGCACCGCCAGCTCCCTGTGCCGCGCACCGC<br>AGCCTGGGGCCCAAGGGCCGCATACTTTCTGGGGGCCAGCCCTA<br>ACGGCCCCCTCCACTTCTTTGGGTAGTCTCGGAGCACGCCGGTAGGA<br>ACCGCCCGGCTTCGGGGACCGCTTTTGTCTGGAACAGTCCCTTCG<br>GGCGAAGCCGGTTCCCTCTGCTGTGAGAGTGTGCTTCCAGCGAGG<br>GGACGATTTGTGTTTACCTCGGTTAACAAGATTTGTAGTTACCCGG<br>TCCAAAAAAAATCTTTTCTCTCTTTGGGTGACTTAAATCTCTATC<br>CAAAATTTCTTGTGTGCTGCTCCCCGATTTTGTGTTTTTTGTTTT<br>TTTTGCTTTACTGT <b>AGGGT</b> CGCCCTCCCGCGCGCTCCCGCTTTTC<br>TGAGACAAGGAA                                                                                                                                                                                                                                                                                                                                                                                                                                                                                                                                                                                                                                    |
| ENSMUST00000019183.1 | 1 | 220 | ENSMUSG00000019039.1 | TGACATACTGCCGAAGGTTGTAGGGCAAG <b>AGGGT</b> GTCTCCCCAA<br>ACGGCCCAGCCCTCTTCGGCTCTAC                                                                                                                                                                                                                                                                                                                                                                                                                                                                                                                                                                                                                                                                                                                                                                                                                                                                                                                                                                                                                                 |
|                      |   |     |                      | TTTAGTCTTCCGGTCGCCATGGCGACCGGGCGCTTGGGTTGGCG<br>AGACGCTGGAGGCCCTTAATGCAGCTGTAGGGCTGGTAGCCAGT<br>GTGGTTTAAAGGAAACCCATGCCCGCACCTTCGTGTTTCGAGACTTC<br>TTGGCACCGGAAGCGCGCTACAGCGCGCTTCAGGGACGGCCAGG<br>TGCCAGAGTGCCTGTTCCGTGCGGTCTCCTGCC <b>AGGGT</b> CCCCG<br>AGTGCCCTTGTACTGCGCTGCGCGCCGACACCCCGGGTTTTATCG<br>CTCCAACCTACAGCGCCCGCTGTCTTCGAACATGTACTCGGTGCC<br>TGGCTCCTATGCTACTCCCGCCAAACCTGCCTCACCAGGCCCGCG<br>AGTTGCTTACACTGCCAGCACTGCGCTGTAATTCGGGGACGCTC<br>CGATTGAGCCAGCTGCGTGCCGTCTCGTAGCCGATCATCTAGTAC                                                                                                                                                                                                                                                                                                                                                                                                                                                                                                                                                                                                        |



|                      |   |     |                      |                                                                                                                                                                                                                                                                                                                                                                                                                                                                                                                                                                                                                                                                                                                                  |
|----------------------|---|-----|----------------------|----------------------------------------------------------------------------------------------------------------------------------------------------------------------------------------------------------------------------------------------------------------------------------------------------------------------------------------------------------------------------------------------------------------------------------------------------------------------------------------------------------------------------------------------------------------------------------------------------------------------------------------------------------------------------------------------------------------------------------|
| ENSMUST00000019354.1 | 1 | 4   | ENSMUSG00000019210.1 | GGGTACTGCGTGTCTCATGGGGTACGTGTGTGCTCAGTGCCCCCGGT<br>GCGGGACCCTCACATGTCAACTTTCTCCAGAACTTCGGGTGGAA<br>TGGCCACTGCCTCGAAGAGCACCTCGACCGAAACTGAGAACCT<br>GTGTTCTTGCAAACCTTAATGGTTCTAAGGAAGCGACGTCGCC<br>TGGCGTCTTAGGCCGACTGTGTCTGAAGGAACTGGTAGAACAGAGA<br>GGCACTGCTGGCTATGACCCAGCATAGACCACGTGTTGGTACTG<br>AAGATGTGCTCTCTGTGCTCTCGGAGCTGCAGGAGGCTGTGCGCCA<br>CTGGCCAGAGGGCGGCCACCCAGCCGGCGTCCAGATGCTGGTGTA<br>GATGACTGCGTGGTTATACACGTGGTTAGCTGTGAAGAGGCATTCC<br>AGCAACAAAAGCTGGATTTGCTCTGGCAGAAAATGGATGACCGGGC<br>TCCTCACAAGCAGAAAACCTGGTGTGTGGTCCCGTAAAAATGGCT<br>GGTGTACCCGGCACCCAGCTGACTGCCCTCAGTACTACAGGCTCA<br>TCCCAGGTTTTCGTCTCAGGTTTGTCTCCGCGCCACTTTGAACCC<br>AGATTGGAAGCTGTCCCTGGCCGGACTTTGCCCTTCGCC                             |
| ENSMUST00000019470.1 | 1 | 92  | ENSMUSG00000019326.1 | GCGAGCGAGAGAGCAAGCAGCCAGCAGGCGGGCGGGTGGCCG<br>GCCCGCACGAGGGAGGGGACGAGCAAGCGGTGAGCAAGCCAGCGA<br>GGGTGCCCGGTTCCGAGGGCAACGGAGATTCTCAGGCCCCCTCCG<br>GTGCCCTCCCGGAGCCAGAGCACCTCCGGCACCCAGCGGAGCGG<br>ACACGGCCCCGCTGGCC                                                                                                                                                                                                                                                                                                                                                                                                                                                                                                                |
| ENSMUST00000019611.1 | 1 | 39  | ENSMUSG00000019467.1 | CCCAGCTTCCGTGGCCCCTCGGCCCTGAAACTTGAAGCAGGTTAGG<br>GGTCCAGC                                                                                                                                                                                                                                                                                                                                                                                                                                                                                                                                                                                                                                                                       |
| ENSMUST0000005515.1  | 1 | 41  | ENSMUSG00000019505.1 | AGTGACGAGAGGCTTTGTCCGGTTCGGCGGTCTTTCTGTGAGGGTG<br>TTTTCGACGCGCTGGGCGGTTTGTGCTTTTCATCACATTTGTTAACAG<br>GTCAAAATGCAGATCTTCGTGAAGACCCGACCGGCAAGACCATCA<br>CCCTGGAGGTGGAGCCAGTGACACCATCGAGAACGTGAAGGCCAA<br>GATCCAGGATAAAGAGGGCATCCCCCTGACCAGCAGAGGCTGATC<br>TTTGGCCGCAAGCAGCTGGAAGATGGCCGACCCCTCTCTGATTACA<br>ACATCCAGAAAGAGTCAACCTGCACCTGGTCCCTCCGTCTGAGGGG<br>TGGCATGCAGATCTTCGTGAAGACCCGACTGGCAAGACCATCACC<br>CTGGAGGTGGAGCCAGTGACACCATCGAGAACGTGAAGGCCAAGA<br>TCCAGGATAAAGAGGGCATCCCCCTGACCAGCAGAGGCTGATCTT<br>TGCCGGCAAGCAGCTGGAAGATGGCCGACCCCTCTCTGATTACAA<br>ATCCAGAAGGAGTCAACCTGCACCTGGTCCCTTCGCCTGAGAGGTG<br>GC                                                                                                            |
| ENSMUST00000019649.1 | 1 | 72  | ENSMUSG00000019505.1 | ATAAATAGCGGCTCGCGCGCCACTGAGCTCAGTGACGAGAGGCTT<br>TGTCCGGTTCGGCGGTCTTTCTGTGAGGGTGTTCGACGCGCTGGG<br>CGGTTTGTGCTTTTCATCACATTTGTTAACAGGTCAAA                                                                                                                                                                                                                                                                                                                                                                                                                                                                                                                                                                                         |
| ENSMUST00000019859.1 | 1 | 36  | ENSMUSG00000019715.1 | GAAGCGGAAGGCGGCGCCACCTCGCGGGGATTCGAGGTTTGT<br>GTCAGTCGTGTCAGCTGGTGACATGCC                                                                                                                                                                                                                                                                                                                                                                                                                                                                                                                                                                                                                                                        |
| ENSMUST00000019950.1 | 1 | 74  | ENSMUSG00000019814.1 | AGCCCTGTGGACCCAGTGTGGAGCTGCCGGCAGGTACCGGGGAGC<br>GGCGGTTCCGCTGCGCGGTTCCGGAGAGGTTGCCCTGCCTCATC<br>ATG                                                                                                                                                                                                                                                                                                                                                                                                                                                                                                                                                                                                                             |
| ENSMUST00000020099.1 | 1 | 80  | ENSMUSG00000019942.1 | TGGCACTCGGCTCTAAGCTCCTGGAGTTGCTGCGTCCGCGCAGTC<br>CGAACTGCGGTGTGGCCCCAGCCGGGACAGAGAGGTTCCGTGTA<br>ACCTGTTGAGTAACT                                                                                                                                                                                                                                                                                                                                                                                                                                                                                                                                                                                                                 |
| ENSMUST00000020174.1 | 1 | 77  | ENSMUSG00000019998.1 | AGCTGAGACCGGCTGCGCCAGGCAGTGGCCCCCGGGTACAGCGG<br>CTGGAGGTGGCCGAGGAAGCCGGCAGGTCAGGTTGACTCCTAGAA<br>ATCCACATAGCCTACCTGCATCTGATGAAATCAGCCAGCCAGCCAA<br>CCAGCC                                                                                                                                                                                                                                                                                                                                                                                                                                                                                                                                                                        |
| ENSMUST00000059116.1 | 1 | 14  | ENSMUSG00000020088.1 | TGTGCTCTGAGGGAGGTCGCGCCGCCAGCCACC GCCGGAGGAGCC<br>CCTCGCGGCTTGTAAGCATCAATA                                                                                                                                                                                                                                                                                                                                                                                                                                                                                                                                                                                                                                                       |
| ENSMUST00000020285.1 | 1 | 48  | ENSMUSG00000020088.1 | CGCGTAGCTGGCGGACCCGGGACTGCTGGTCTGTGTGCTCTGAGG<br>GAGGTCGCGCCGCCAGCCACC GCCGAGGAGCCCTCGGGCCGTT<br>GTAAGCATCAATA                                                                                                                                                                                                                                                                                                                                                                                                                                                                                                                                                                                                                   |
| ENSMUST00000020342.1 | 1 | 358 | ENSMUSG00000020134.1 | CCAGGTTGCTGGCTTCTTAGTTCTCTGCTTGGCATATATATTAGTCA<br>AAGGGAGCACAGAAAATTCAGTCTTCTTGTTCCTTAGATCCCAGAA<br>TCCCTACTGTTCTGCCTCTCTCAGATTTTATATCTTCTTATATTT<br>TTTTTTCATGCTATTTATATATGTGCCTACATGTACCATGCTGTGC<br>ATGTCGAGGCCAAAGGACAGTTTGCAGCAATGGTCTCTTCTTCTTTC<br>ACCAGTGAGGTCCAGATCAAACCTCAGTCAAAGGTAAGCACTT<br>TACCCACTGAGCCATCCTGCCAGCTCCCTCCCTTCGTATATTTAGA<br>AAAAGCTTTCTATATCTGCTTACATATTTTATCCAGGTTCTTAA<br>TTATACTTTGTAGAAAATAATAGGAAAATGGACAACCTTTGTTTCAGTA<br>AAGTGGCAGACAGACAAAATGTACATTTATCTGTTTGTGTCAAAATAC<br>AGAACCATTGACATGTGTTTCATGTGATTTTCTTGCTGTGTTTCATG<br>AAGACTTGGAAAACTACTTATTTAACTGGAATCATGTTTCATGTT<br>ATTAACAAAACCTTTTCTCTTTAGGAAAATAATGCAAAAGGTGTCT<br>CAAGGCTCCTGACCAGTGAACAGAGATTTGAGAAAAGACAGCCAAGC<br>TC |

|                      |   |        |                      |                                                                                                                                                                                                                                                                                                                                                                                                                                                                                                                                                                                                                                                                                                                                                                                                                                                                                                                                      |
|----------------------|---|--------|----------------------|--------------------------------------------------------------------------------------------------------------------------------------------------------------------------------------------------------------------------------------------------------------------------------------------------------------------------------------------------------------------------------------------------------------------------------------------------------------------------------------------------------------------------------------------------------------------------------------------------------------------------------------------------------------------------------------------------------------------------------------------------------------------------------------------------------------------------------------------------------------------------------------------------------------------------------------|
| ENSMUST00000020358.1 | 1 | 39     | ENSMUSG00000020149.1 | GCGATCACTGAGTGGCGGGCTGCTGATTGTGTCTTA <b>AGGGT</b> CGG<br>AGTGGGGTCGACGTTTGCCTACCGGAACAGCTTAGCTCATTCCCTC<br>CCTTTCATTACCTGTGGCGGGAGAGTTGGGGCGGGCTGCGTC<br>AGCAAGGGCGGTGGTGGCGCGGGCGCGCAGCTGCAGTGACA<br>TGTCAGCATGAATCCCAATAT                                                                                                                                                                                                                                                                                                                                                                                                                                                                                                                                                                                                                                                                                                          |
| ENSMUST00000020420.1 | 1 | 2      | ENSMUSG00000020198.1 | <b>AAGGGT</b> CTGTGGAAGCTGGGGGGGGGGCTTACTGGCTACCCCTT<br>CTCCTCAGACTGCTCTCCGGCTACAGCCGTCGCTTGGCTCCACG<br>GCGTCCCTCCGCGGGCGGCGAAACACAGCGGGCGGTTGCCTGA<br>GGTGCGGTCCCGGGTCCCCGCACCTTCTAGGGCCGCGCAGCGG<br>GTTTCCCTCGGAGGCGCAGCCACGGCCCGCCG                                                                                                                                                                                                                                                                                                                                                                                                                                                                                                                                                                                                                                                                                               |
| ENSMUST00000020604.1 | 1 | 366    | ENSMUSG00000020346.1 | GGTGGGGCTGCGGGCGGCAGGGACCTGGCCCCGGCTGGATCTGG<br>AGCCGGGAGGGCGGAGGCTCCCAGCCCGGACCGATGGCGGGGCC<br>AGTTTCCACAGAGATCAGCCTCCCGGGCCATGTTGGTGTAAAGC<br>CTGTTTCTTCTCCTGAGCCCGGCAGAACACAAGTGGACCAGTGGGA<br>TGACTTCTCTGTCTGAGCAAGAGATGGCTAATCCCAGCAATCTC<br>TCTACCCTGGCTCTGAGCTGTAAAAGCCAGCTGGATGAAGGGAT<br>GTAACACGCGCTGGGAGGGACACTGAAGTCAGGAGTGGGGGGGA<br>GGGGCCCGGACACACCCCTTCCCCCCCCAGACTCTCCCCATC <b>AGG</b><br><b>GT</b> GCACGTGGCCATGGACTTTGGACTGGATAAGTGGAGAGAAGCT<br>GTACTTTGGGGGATCTGATTTCTAGTTTGGAAATGAAGTATTAGG<br>TTGGGGAGGGGGCGGGTTGATGATCTTCAGGGAAGCGACAGAGA<br>GAAGAAAAGAAAGGTACATGGCTTCTTCTACTCTCAGCCTAGAAG<br>AATAAACCCCTAGTGTGGGGACCTGAGCCAGGCAAGCCAAAGGCAG<br>CCTTGAGCCCTCCCTCCCTGCCCCCTCGGGGGCCAGG                                                                                                                                                                                                                        |
| ENSMUST00000020640.1 | 1 | 18     | ENSMUSG00000020372.1 | TCTTCTTTTCTCCAC <b>AGGGT</b> CGTGGTGGCAGCCGCTGTGGTGTCT<br>TGGCTCTCTGAGCTATCCGGTGCCATCCTTGTCTGCTGCGGCGACCC<br>TCGCATCAACTGCAGCC                                                                                                                                                                                                                                                                                                                                                                                                                                                                                                                                                                                                                                                                                                                                                                                                       |
| ENSMUST00000020653.1 | 1 | 81     | ENSMUSG00000020386.1 | AGGAGCTGAGAAGAGCTGGGGCCCTGGCAGCCATAGCGCTTTGCAC<br>AGCCGGCTTGGAGCGTGTAGGACGGGCACGGAG <b>AGGGT</b> TGCGTTT<br>TCTGAAGTCGCAGACCTGTAAGATCTGGAT                                                                                                                                                                                                                                                                                                                                                                                                                                                                                                                                                                                                                                                                                                                                                                                           |
| ENSMUST0000003461.1  | 1 | 29     | ENSMUSG00000020456.1 | GGCGTTGACACCCGGAGCTCGCGGCC <b>AGGGT</b> ACTTGTGGAAGGC<br>TTCAGGACAAA                                                                                                                                                                                                                                                                                                                                                                                                                                                                                                                                                                                                                                                                                                                                                                                                                                                                 |
| ENSMUST00000060992.1 | 1 | 27     | ENSMUSG00000020458.1 | ACCCTAGGGCTTTGTCTACGAGTGGC <b>AGGGT</b> G                                                                                                                                                                                                                                                                                                                                                                                                                                                                                                                                                                                                                                                                                                                                                                                                                                                                                            |
| ENSMUST00000018744.1 | 1 | 164    | ENSMUSG00000020534.1 | GCGCTCTCCAGGAATTGGCGATCCACTTGCCTCTGCCTCCCTAGT<br>GCTGGGATTAAAGGCGTGCGCCACCACACCGCTTTAGTCCCCTTTC<br>ATAAAGACCCGAGGAACAGACGTTTACGGCCAGCTCCCCGAAACCAA<br>GTGAACTGGAGGCCACCCTCACCA <b>AGGGT</b> TGGAACCTTTTCCACAA<br>AATCCACGCTCCTAATACAAGGCAACTCTGAACCAGTGCA                                                                                                                                                                                                                                                                                                                                                                                                                                                                                                                                                                                                                                                                            |
| ENSMUST00000051716.1 | 1 | 57     | ENSMUSG00000020608.1 | TTTGGGGGGTGTGCCCTGCTTGGCGGGCAGCGGTGGCCGAGGTC<br>CGACCCCTC <b>AGGGT</b> CGCCTTCCGTGCTGACAGCCCGCGCGTGT<br>GCTTCCCCGGGGTGACCCGCGACTTGTGGAGATCTG                                                                                                                                                                                                                                                                                                                                                                                                                                                                                                                                                                                                                                                                                                                                                                                         |
| ENSMUST00000020960.1 | 1 | 69     | ENSMUSG00000020632.1 | TTCTTCCGCCACCCGGATATGAGCCGTTCTCGGAGAGCCGTCCTT<br>CTTTCTAAGCCGGCGATCCGTC <b>AGGGT</b> GGAAGCC                                                                                                                                                                                                                                                                                                                                                                                                                                                                                                                                                                                                                                                                                                                                                                                                                                         |
| ENSMUST00000061672.1 | 2 | 62,500 | ENSMUSG00000020661.1 | CCACAGGCAGAGCCGCTGAAGCCAGCGCTGAGGCTGCACTTTTC<br>CGAGGGCTTGACATC <b>AGGGT</b> CTATGTTTAAAGCTTAGCTCTTGCTT<br>ACAAAGACCACGGCAATTCCTTCTGTAAGCCCTCGCAGCCCCACA<br>GCGCCCTCGCAGCCCCAGCCTGCCCTACTGCCAGCAATGCCCT<br>CCAGCGCCCCGGGACACCAGCAGCTCCTCTTGGAGCGGGAGGA<br>TGATCGAAAGGAAGGAGAGGAACAGGAGGAGAACCCTGGCAAGGAA<br>GAGCGCCAGGAGCCAGCGCCACGGCCGGAAGTGGGGAGGCCTG<br>GCCGGAAGCGCAAGCACCCACCGTGGAAGCAGTGACACCCCAA<br>GGACCAGCAGTGACACCAAGTCTCAGCCATGGCCAGGACTCT<br>GGCCCTCAGATCTGCTACCCAATGGAGACTTGAGAGAAGCGGAGTG<br>AACCCCAACTGAGGAGGGGAGCCAGCTGCAGGGCAGA <b>AGGGT</b> TGG<br>GGCCAGCTGAAGGAGAGGGAAGTGAAGCCCAAGAGAGCCCTCC<br>AGAGCTGTGGAGAAATGGCTGCTGTGTGACCAAGGAAGGCCGTGGAG<br>CCTCTGCAGGAGAGGGCAAAGAACAGAAGCAGACCAACATCGAATC<br>CATGAAAATGGAGGGCTCCCGGGCCGACTGCGAGGTGGCTTGGGC<br>TGGGAGTCCAGCCTCCGTGAGCAGCCATGCCAAGACTCACCCTTCC<br>AGGCAGGGGACCCCTACTACATCAGCAAACGGAACGGGATGAGTG<br>GCTGCGACCTTGGAAGAGGAGGCTGAGAAGAAAGCCAAAGGTAAAT<br>GCAGTA |
| ENSMUST00000020991.1 | 1 | 62     | ENSMUSG00000020661.1 | CCACAGGCAGAGCCGCTGAAGCCAGCGCTGAGGCTGCACTTTTC<br>CGAGGGCTTGACATC <b>AGGGT</b> CTATGTTTAAAGCTTAGCTCTTGCTT<br>ACAAAGACCACGGCAATTCCTTCTGTAAGCCCTCGCAGCCCCACA<br>GCGCCCTCGCAGCCCCAGCCTGCCCTACTGCCAGCA                                                                                                                                                                                                                                                                                                                                                                                                                                                                                                                                                                                                                                                                                                                                     |
| ENSMUST0000002980.1  | 1 | 36     | ENSMUSG00000020664.1 | GCTCCTCGCGATGACGTATATGTTGCGCAGGGCGC <b>AGGGT</b> GGGGAG<br>ACCTGGATAAGCTTACCAGCGGTTTCAGCGGAGGTGAAAACCCCT<br>GGTTGGAGGACGGGACCGAGGGACG                                                                                                                                                                                                                                                                                                                                                                                                                                                                                                                                                                                                                                                                                                                                                                                                |

|                      |   |           |                      |                                                                                                                                                                                                                                                                                                                                                                                                                                                                                                                                                                                                                                                                                                                                                                                                                                                                                                                      |
|----------------------|---|-----------|----------------------|----------------------------------------------------------------------------------------------------------------------------------------------------------------------------------------------------------------------------------------------------------------------------------------------------------------------------------------------------------------------------------------------------------------------------------------------------------------------------------------------------------------------------------------------------------------------------------------------------------------------------------------------------------------------------------------------------------------------------------------------------------------------------------------------------------------------------------------------------------------------------------------------------------------------|
| ENSMUST00000015107.1 | 1 | 2         | ENSMUSG00000020694.1 | <b>TAGGGT</b> TAGAGAAGACAGTTGGTACAGAAGAAAGGAGACTGAGAAG<br>GACTAGAGAGGAGAGAGGCAGTTGGTGAAGAGAATGAACAGTAAAA<br>GAAAGGCTGGTGAGCCAGGAAGCTAAGCTGAGCCAGAAAAGATCC<br>TACTGTTAGGAAAACAGAGGGAGAATCCATGAAGAACTCACACAAA<br>TAGCAGGAAAAAAAAGACATAAAGCTTCAATTTATAGAAAATTA<br>TTGCTGGGCAGTGGTGGCATTGCGCTTTAATCCCAGCTCTCGGGAG<br>GCAGAGGCAGGCGGATCTCTATGAGTTTCAGGACAGCCAGGGCTAC<br>ACAGAGAAAACCTGTCTTGACCCCCATCTTCCCCCAAAAAGGT<br>GAACTAAAAATTTCACTGTCTTCAAATGGTTCTTTAAAACCTGC<br>ACTCAGGAAACAGGCATCAGGGCATATGCTTATACTGCCAGCTCCT<br>AGGGCCTGGGACAAAAGGACTGAGAATTTAGAACAATCTTGGCTAC<br>ATAGTGAGACTCTCTGAAAACAGATAAAGTCTTCAGACACGTTCA<br>GACATCTGGTCAAGGAAGCATCAGAAGAAAACAAAAGCTGAGTCCG<br>TTACTTTGAAGTCCGTGTCTTGGCTCGTGAACATAGAAATG                                                                                                                                                                                                   |
| ENSMUST00000021052.1 | 1 | 34        | ENSMUSG00000020710.1 | GTCTCCCATTTGAGAGAGAGAGAGAGATGG <b>AGGGT</b> ATGGGCTA<br>TGGACCTCGGAGGGCTCGCCACATGACCTGTGTCCCTCCACTGTT<br>CACTTTCCTCAGCGTCCCTGGC                                                                                                                                                                                                                                                                                                                                                                                                                                                                                                                                                                                                                                                                                                                                                                                      |
| ENSMUST00000021085.1 | 1 | 20        | ENSMUSG00000020739.1 | AGAGAAGCGGCCGCGCGG <b>AGGGT</b> CCAGCGCGGGGGCACGGCG<br>CT                                                                                                                                                                                                                                                                                                                                                                                                                                                                                                                                                                                                                                                                                                                                                                                                                                                            |
| ENSMUST00000021087.1 | 1 | 96        | ENSMUSG00000020743.1 | GTCTGACCTAGTTACCTGAGCGGGCAAGGGATATGGTGACCCCG<br>GCGGGGGTGGCACTGGCAAGACCAACAACCTTCAGCAAAACGCA<br>GGG <b>AGGGT</b> CCGGCCAGCGCTCGGAGGCTTTCGTGGTCAGAAA<br>GGCGGAGGTGCTGTCTTAGTTTCAGGCCAGTGAACCTGCCGGG<br>CTTAGACCGTC                                                                                                                                                                                                                                                                                                                                                                                                                                                                                                                                                                                                                                                                                                    |
| ENSMUST00000016008.1 | 1 | 115       | ENSMUSG00000020802.1 | CAGAGTGGCAGTGGCACTGGTCGTAAGAGCATTCCCTTGTTCCA<br>TCAAAAACCTGAAGCGAAAACACAAGAGGAAGAAGAATAAGGTAC<br>CCGTGACTTCAAGCCTGGAGAC <b>AGGGT</b> GGCAGTGGAGGTTGTGACC<br>ACG                                                                                                                                                                                                                                                                                                                                                                                                                                                                                                                                                                                                                                                                                                                                                      |
| ENSMUST00000019038.1 | 1 | 53        | ENSMUSG00000020824.1 | AGAAGCAGGCGCCAGAACAACCGGAGTCCCTGAGGCTCCAGAAC<br>AGAGT <b>AGGGT</b> GAGCCAGCCCCAGCCCAGCCCAGGTTCTGGCTTC<br>CTCTCTGCTTCTCCTCCTTTGGTTGCAGCCAGCAGAGCCCACTT<br>AAACTCCGAGGTGACTCCAGCTGTGTTGGCGAC                                                                                                                                                                                                                                                                                                                                                                                                                                                                                                                                                                                                                                                                                                                           |
| ENSMUST00000021197.1 | 1 | 13        | ENSMUSG00000020840.1 | CTTCCGGCGCTT <b>AGGGT</b> GCGAGAACCAGGTCCGGCCAGCTAGGCAG<br>CGGACTGTAGTGTAAACCCAGAGCTCACCTGAAAACCTGAAAAC<br>AACCTTCCCTCCACGAAGCAGTTTGGGCGCC                                                                                                                                                                                                                                                                                                                                                                                                                                                                                                                                                                                                                                                                                                                                                                           |
| ENSMUST00000021338.1 | 1 | 339       | ENSMUSG00000020955.1 | GAGCCAGGAGGCAAGACGCTCATCCAGGCCCTTCCGCGTGGCC<br>TCACCTCAAGGGGACCCACAAGCGCAAACTCAGTGCCTAGCGGGC<br>CCACGCCAGACTCTCGCCAGAGGCGCTGGGCCAAACCCCGGAGG<br>CCCAGGAGAGGTGGCTCCGGAGGAGCCCTGCGGACGCCATGTAAA<br>AGCCAAAATGGCTGCCCAAGGATGCCCGCAGCGCGCCGCCGTGA<br>GGAGGGAGCCGGGCGCGCTCACCGCTCGCCGGCCGGAGCGGCTC<br>AGGTTCCAGTACGGTCAATCCAGTGCATAACTTTTAAAGGATATT<br>GCAAAGAACTGGGAA <b>AGGGT</b> GAAAAA                                                                                                                                                                                                                                                                                                                                                                                                                                                                                                                                |
| ENSMUST00000047981.1 | 1 | 51        | ENSMUSG00000021012.1 | GCGGCAGCGCGGCAGCGGCAGCGCGGCGTAGGGGGCCAGG<br>CTG <b>AGGGT</b> GGCAGCCCGCGGGCTCCAGGTAACCGAGGCGCCG<br>CGCAGTGCCGAGCCGGCCCGCCCGCCGAGCC                                                                                                                                                                                                                                                                                                                                                                                                                                                                                                                                                                                                                                                                                                                                                                                   |
| ENSMUST00000021564.1 | 1 | 149       | ENSMUSG00000021136.1 | GCCGCGCCACGCCGAGCGCAGCAGGCGCCACGCCAGAGCACAG<br>CTCGACTCCAGCTCCGGGCTCCGCGCTTCATGACCGTGACCCCG<br>GGCGCAGGCTCCTCCAGCCCCTGCCGCTGGCTCTTCGGCCACTTCC<br>AGCTGCTGCA <b>AGGGT</b> CCCCACCTCCCCAAGTGCCTTGAAGTACCC<br>TGAGCCCCCTGCCCGCTGCCCGCTCGTGGCTGCCCGCTCCGCTG<br>GCACC                                                                                                                                                                                                                                                                                                                                                                                                                                                                                                                                                                                                                                                     |
| ENSMUST00000062658.1 | 2 | 1508,1619 | ENSMUSG00000021156.1 | CTGGGAAGTGGCTCCTCACCTCCTGTCTACTGGCTCAGAGTTTGT<br>AAGCCCTGAGTGTACCGTTGTATGCTGCTTTACAGTAGGCA<br>GAGTCCACACCATGAGCTTAAACCTCCAGCACCATGGGGTTTCTA<br>ACTACACCTCCCAATCCTTCCACAGAGCTGGATTCCTTCTGAAA<br>CATCCAGGATATCAGGTCATGTTTACCAGTGCACGTGAAGCGC<br>AGCATGGGCTGGAAGAAGGCTGTGACGAGCTGGAACATGCATCAGC<br>GCTTCCCTCCGTGAAGGAAGGTTCTGGAAGTCTAAGAATGAGGACCG<br>AGGTGAGGAAGAGGCAGAAATCCAGTATCTCCTCCACCAGTAACGAG<br>CAGGTGAGTCCGCGGTGTCGGTAAGAAGGCGCTGCTGATTCGGATT<br>CTCCATGTACCTCCTCACTGTCTATAAACAGGTTTGTGACATCTTCT<br>TTCCCTTTCTACAAACATCTGTAAAGTTCTCTGCACAAAGTAACCA<br>AACAGTGCAAAGATGTGAGTGGGTAGAAGCAACCTGGAGCCTGAC<br>CCAGTGGTGGGAGGAGATAAGTGCAGCGCTCGGCTCTCGGGCTC<br>CGTGGCTTTTACCACCAACCCACAGCAATAACGAAGCAAGGGGCT<br>GCTGAGTGGATGGAAGGACTCCCTTCTCTCCTGCGCGTCCACTACA<br>AGTATTTTCAACACAGAGGTAATTTCCGTGTGTGCCAAGTAATAAGA<br>TATTACTTTTATAATGCCACAGCTGAAGGTCACTCAAGAGCCAAAG<br>AGCAAAGAAAGGACGACGTAATCAGAGTGTGGAGCCCAAAAAGGAA |

|                      |   |        |                      |                                                                                                                                                                                                                                                                                                                                                                                                                                                                                                                                                                                                                                        |
|----------------------|---|--------|----------------------|----------------------------------------------------------------------------------------------------------------------------------------------------------------------------------------------------------------------------------------------------------------------------------------------------------------------------------------------------------------------------------------------------------------------------------------------------------------------------------------------------------------------------------------------------------------------------------------------------------------------------------------|
| ENSMUST00000058861.1 | 2 | 70,91  | ENSMUSG00000021241.1 | GTAAGTTGCCCGCCTCACAGTGTCCAGGTGGCAATCGAAAGAGGAA<br>AGAGTCTCAAAGTACGCTCAAGCAGATCAAGTAATATCCGTCAAGT<br>TAAGGCCAGTCTCCCGACTCCTGTCGTTGTGGACTGCTGCTCGAC<br>CAGCACGCCAGTGCACAGTCTCCGTCCCGTAGCAGCAGCGGGGAG<br>CTCCAGGGCCTTGTCCCTAACTGCCAGGCGGTGAGGGCTGTCTATT<br>CCTAGGCGCTCGGGAAGGTATCG <b>AGGGT</b> GGAACGTCACTTAGGA <b>AG</b><br><b>GGT</b> GT <b>TGGGT</b> TCTGCGTCTTCAGGATAGATGGGAGGC <b>TAA</b>                                                                                                                                                                                                                                           |
| ENSMUST00000021706.1 | 1 | 6      | ENSMUSG00000021277.1 | GGTAC <b>AGGGT</b> CCCCATTACTTGAAGGATAAGGCTGGCAGCGCTCCG<br>ACGTCTGTGTGGAAGCTTCCCTCCCTTCTGAGCTTCTCTAGACT<br>CCTTACAGCGCACGGCACAGAATTT <b>CAGTT</b> TCCTAAG                                                                                                                                                                                                                                                                                                                                                                                                                                                                              |
| ENSMUST00000060274.1 | 1 | 6      | ENSMUSG00000021277.1 | GGTAC <b>AGGGT</b> CCCCATTACTTGAAGGATAAGGCTGGCAGCGCTCCG<br>ACGTCTGTGTGGAAGCTTCCCTCCCTTCTGAGCTTCTCTAGACT<br>CCTTACAGCGCACGGCACAGAATTT <b>CAGTT</b> TCCTAAG                                                                                                                                                                                                                                                                                                                                                                                                                                                                              |
| ENSMUST00000001307.1 | 2 | 80,303 | ENSMUSG00000021282.1 | CAACGCTGTGCTCGCTCGGCCGGGGCAACCCATGACTCGCCGGTGGCCT<br>TTGATGTGACAATCTCCCGCGGCTGAGGGAGC <b>AGGGT</b> TTGTGTTC<br>CGTGTGTCTCCTCGTTTCGAGCAGTTTCCCTGCCAGTCACAACC<br>CGTGTCAAATGGTGGCTCCTGGGTTCCTGGAGTTGTCTTTGT<br>ACATGGGGATGTCAGCTGTTTCTCACAAGGACTCGGGCTGTTAGA<br>GCTCGGAGTGTAGTTGTGTGAGGACTCGGGGACGGGAAGTTGTC<br>CCGGGAGGAGTGATGCTAAACCTGT <b>AGGGT</b> TGTTGTGTGTTTCT<br>CCTTTCTCTTT <b>CAGAGCT</b> GTTCGCGAGCCATTGGTACCTGTATTG<br>GGGAAACATAGCATAACAAGCAAGAAGCTTACAGCCTCAGTGGCGAA<br>AATTTTTCATGT <b>CAGAGACCGAGA</b> ACTCTTGCAGTCGTTATGTC<br>ATCCCTTCTTCTCCAGACAGAAGATACCAAAAAGTTGCAATCAAAG<br>ATCTCTTCACTTTATGATAAAAGTCACTAATAAGCCAAA |
| ENSMUST00000050993.1 | 2 | 80,303 | ENSMUSG00000021282.1 | CAACGCTGTGCTCGCTCGGCCGGGGCAACCCATGACTCGCCGGTGGCCT<br>TTGATGTGACAATCTCCCGCGGCTGAGGGAGC <b>AGGGT</b> TTGTGTTC<br>CGTGTGTCTCCTCGTTTCGAGCAGTTTCCCTGCCAGTCACAACC<br>CGTGTCAAATGGTGGCTCCTGGGTTCCTGGAGTTGTCTTTGT<br>ACATGGGGATGTCAGCTGTTTCTCACAAGGACTCGGGCTGTTAGA<br>GCTCGGAGTGTAGTTGTGTGAGGACTCGGGGACGGGAAGTTGTC<br>CCGGGAGGAGTGATGCTAAACCTGT <b>AGGGT</b> TGTTGTGTGTTTCT<br>CCTTTCTCTTT <b>CAGAGCT</b> GTTCGCGAGCCATTGGTACCTGTATTG<br>GGGAAACATAGCATAACAAGCAAGAAGCTTACAGCCTCAGTGGCGAA<br>AATTTTTCATGT <b>CAGAGACCGAGA</b> ACTCTTGCAGTCGTTATGTC<br>ATCCCTTCTTCTCCAGACAGAAGATACCAAAAAGTTGCAATCAAAG<br>ATCTCTTCACTTTATGATAAAAGTCACTAATAAGCCAAA |
| ENSMUST00000021807.1 | 1 | 381    | ENSMUSG00000021377.1 | TTCTGAGGAGCGGGGAGAGAGAGAGCGCGAGAGAGAGCGAGCGCGC<br>GGCGCGAGGACCTCGGCCCGCGGACTTCTACACAGCGGGCGCCT<br>TCTGTGCGCACCCGCGGCCCCAGCATGTGCGCGCGCGGCCCC<br>CGTGTGCGGAGGAGAGGACGCCCCCGTCCCGCCCTCATCCGAGAAG<br>GAACCCGAGATCCCGGTCCAGGGAAGAGAGT <b>GAGGAGGAGGAGG</b><br>AGGATGACGAAGACGATGATGAAGAGGACGAGGAGGAAGAAAAAGA<br>AAAGAGTCTTATCGTGAAGGCAAGAGAGAGAAGAAAGAAAGTAGAG<br>AGACTGACGATGCAAGTGTCTTCTTACAGAGAGAGCCATTTACAG<br>TGACACAAGGGAA <b>AGGGT</b> CAGAAACTTTGTGAAATTGAA                                                                                                                                                                        |
| ENSMUST00000021921.1 | 1 | 66     | ENSMUSG00000021466.1 | TGGATGTGGGCGAGCGCGCGCGCAAAAGACCTCGGGACTCACGCGCA<br>ATGTGGCAATGGAAGGCGC <b>AGGGT</b> CTGAGTCCCGGCAGCGGCCAC<br>GGCCGAGCACCCCGAGCGCCCGCGTGTGAGCGGACAGCGGGT<br>CTGTACCCGAGCGGAGTCCCGCGCGCCAGCAGCGTCTCGCG<br>AGCCGAGCGCCAGCGCGCGCGGAGCCCGCGCGCGCGCGCAAC<br>GTTTCAGGCCCTGGAGCTGGTCCCGCGGTTCCAGGATCAGTCACT<br>TCCGCGTAATGTGGGG <b>AGGGT</b> GAGAGCTCTACGATGTGCGCCCTAC<br>TAGGCTGCTTCTT <b>CAGGCT</b> GCCTTCTCCCTGCTCCGGGACGCGG<br>TGGTGGCGCGCGACCCCGCCTCGCGCGCGGTTCTTCCCTGGGC<br>TAGCACCTTCT <b>CAGGGT</b> GCCAGACCCCGCCAGCGT <b>CAGGCACC</b><br>TTCGCTGCTGCGGTCCGTGCTGCGGGTCCAGCCTTCTAGGGC<br>CGGGCCTCCGGGCGCGCGGAGGACGGGGAGAAGA <b>ACT</b>  |
| ENSMUST00000022276.1 | 1 | 3      | ENSMUSG00000021756.1 | GG <b>AGGGT</b> GGCGTGTGCGGTGGGAGGCCAGAGCTTCGAGCCATCCG<br>GGCTGCGGCTCCGCTGAGGGACCGGTGGTGTGGCCGGGATCCGCG<br>GGCTGAGGGACGCTCAGGAGCGCGGAGGCTCGCGTCCGGAAGGAA<br>GACCCGATAGAAGGAACATGACATCTAGAGGCAGCGAACTTGTTC<br>CGATTCATGCTTTATCATTTCTTAATTTCTGATGTTGGAAACATCC<br>CTGCAAG                                                                                                                                                                                                                                                                                                                                                                 |
| ENSMUST00000022383.1 | 2 | 4,17   | ENSMUSG00000021835.1 | GAG <b>AGGGT</b> GGTGTG <b>AGGGT</b> GGGAAGGCAAGAGCGCGAGGCCTGG<br>CCCGAAGCTAGGTGAGTTCGGCATCCGAGCTGAGAGACCCAGCC<br>TAAGACGCCCTGCGCTGCAACCCAGCCTGAGTATCTGGTCTCCGT<br>CCCTGATGGGATTTCTGCTTAAACCGTCTTGGAGCCTGCAGCGATC<br>CAGTCTTGGCCCTCGACAGGTT <b>CATTG</b> CAGCTTCTTAGAGGTCC<br>CCAGAAGCAGCTGCTGGCGAGCCCGCTTCTGCAGGAACCAATGGAG                                                                                                                                                                                                                                                                                                           |

|                     |   |         |                     |                                                                                                                                                                                                                                                                                                                                                                                                                                                                                                                                                                                                                                                                                                                                                                                                                                                                                              |
|---------------------|---|---------|---------------------|----------------------------------------------------------------------------------------------------------------------------------------------------------------------------------------------------------------------------------------------------------------------------------------------------------------------------------------------------------------------------------------------------------------------------------------------------------------------------------------------------------------------------------------------------------------------------------------------------------------------------------------------------------------------------------------------------------------------------------------------------------------------------------------------------------------------------------------------------------------------------------------------|
| ENSMUST0000050772.1 | 1 | 257     | ENSMUSG0000022199.1 | CCATTCCGTAGTGCCATTTCGGAGCGACGCACTGCCGACGCTTCTCT<br>GAGCCTTTCCAGCAAGTTTGTTCAGATTGGCTCCCAAGAATCATG<br>GACTGTTATTATATGCCTTGTCTGTCAA<br>GCAGAGCTGCAGAGCGGGTCTCCCGCCCTCTGCGTCTAGCTCT<br>CCGCACCTAGCCAGCCAGACAGCAGCTCATTCTTCGGCGCGGCC<br>CATAGGGCCCCAGCGGTTCGGCAAGCTGGCTCCCGAGTAGCCACCG<br>GGACCCCGAGCCCAATGGCGGGGGCGGCAACAAAATCGACAGCGC<br>CGTGGAGATCGCCCCGGTCCAATGGAGCAGGTCTGGGAGCTCGG<br>AGATGCGGTCCCCCGAGCAGCTGCA <b>AGGT</b> GAGCGGGAGCGCCGG<br>CGGGAGGGGAGGGCGACGCGTGGGCAGCAGCTGTGCTGGCCG<br>CGCCCCGGGACCCCTCAGCTTCGAGGCTGTGCTCGCCAGGTGGG<br>GGCCCTGGTGGCGCCAGCAGCTGCAGCTCGCCCTGTGCTAGCTG<br>CCCGTCTTTTCGTGGCGCTGGGCATGGCTCAGACCCCATCTTCA<br>CGCTGGCGCCCCGCTGCACTGCCACTACGGCGCTTGCCCCCAA<br>CGCTTCGGGTGGGAGCAGCCCCCAACTCCAGCGGCTCAGTGTG<br>GCCGGCGCGCCCTAGCAGCCAGCGCCAGCGGAGTCTGCAACCA<br>GTACGGACCCCTCGTGCAGTGGCTTCGCCCCACCAGACTTCAACCA<br>CTGCTGAAGACTGGGACTATAACGACTGCCCGTGTCAACCACC<br>A |
| ENSMUST0000022815.1 | 1 | 60      | ENSMUSG0000022204.1 | GGAGGTGCTGGAGTCAGACGTGTCAAGTTCGATAAACACTTTTGAAA<br>AACCTCCAGGAGC <b>AGGGT</b> G                                                                                                                                                                                                                                                                                                                                                                                                                                                                                                                                                                                                                                                                                                                                                                                                              |
| ENSMUST0000022856.1 | 1 | 16      | ENSMUSG0000022248.1 | GCTTTTGGACGCTC <b>AGGGT</b> CTTCTGGGGCTGGGGTGGCAGGGGC<br>TTTGAGGGGTTCGGACGTCACCCACAGCTGGCGCCAGGGGCTCCCT<br>TAGTGGCCGCTGTGCGGCGAGCGGGCCGAAGTCGCGTTCTCTGCA<br>AGCCAGGTTTTCACACATCTTCCGGAAGAGGAGCATCTTCTTCTC<br>GGAGCCGACCGTACCGTGGACCATCC                                                                                                                                                                                                                                                                                                                                                                                                                                                                                                                                                                                                                                                      |
| ENSMUST0000022867.1 | 2 | 54,74   | ENSMUSG0000022257.1 | CCCAGTGTCCCGTCGCAGCGGCCACTCGGAGCTCTCGGTACAGTGC<br>AGAGCCA <b>AGGGT</b> CGGGCGAGCGGTCC <b>AGGGT</b> CGGGCGGCCAAGG<br>AGAGGGGCGAGGAGCAGCGGACCCAAAGACGAAGCGAGCGAGCTCTC<br>ACAACTTCCACGAGCGCCGGAGCT                                                                                                                                                                                                                                                                                                                                                                                                                                                                                                                                                                                                                                                                                              |
| ENSMUST0000054014.1 | 1 | 360     | ENSMUSG0000022430.1 | CAAAGCAAAATAGGTGTGTATTTTGGCTTTGGTTGCTTTTAAAT<br>ACAAGAGCAAGACAGAATCTAACTGTTGAGTCTGAGGATGTAGTGA<br>GTAGATGAAGTGCCTTTCCGTGCTGCTCTGTGACTGGTCTGAAGGT<br>AAGTTGGTTGTATTTGGTAGACTGTGCCAGGCTTCTCCCAACAG<br>AGTAAAAGTGATTTGGCCCTGCACTTAATGGTGGTTACTAAGTTC<br>TTCTACATTTCTAGCTTCGAAAGGGGTGGCAGTATTTGTCTATT<br>CTGAACCTCTGGTCTCAGTGTAGCTCCTGTGTCAGCATATCATTACAGA<br>AGAGGCGAGGAGTTTGGGGTATTGGAGGGAGCTCCCAT <b>AGGGT</b> AATC<br>ACAAACCAAGATGCAGGGCCTGCCTGTGTCCTGAGTGGCACTGATC<br>CTCTTTACTCTGTGGGATGAGTCTTTTTTTGTACCTACTCAGG<br>GCAGTTACTAACTTCATCTTCTCCCTCTGTGCTGTCATCTGCATTC<br>GTGCTCTCCACCTCTTGGCATGTCTTACCTTCTCTTTCTCTGCCA<br>CATCAACCTACACAATGTCTCCTCATTGACGTGGAAGATGTGAAG<br>ATGTCAAGTTTGTATCAACTACGATTATCCAACAGCTCAGAGGA<br>TTATGTTACCGTATTGGCCGAACGGCCCGCAGCACCACAAGGGC<br>ACTGCCTATACTTTCTTTACCCCGGCAACCTGAAGCAGGCTAGAG<br>AGCTGATCAAAGTATTGGAAGAGGCCAATCAAGCCATCAATCCAAA<br>ATTG           |
| ENSMUST0000023108.1 | 1 | 55      | ENSMUSG0000022471.1 | AGTTTAGGGAACAGGGGTGGAAGCGGGAATGCGAGTGGGCGTGC<br>CCGCTTGA <b>AGGGT</b> CGAAGGGCGTGTGTGCGTGTGACGCAACGTC<br>GCTGATTGGGCGAGAGACAAGGAGCCCGCTGGACGTGGTGGCCAC<br>CTTCTGCTGTCCAGTGGCTTGCCCGCTGCGGTTAAGTGAGCAAA<br>CCAAC                                                                                                                                                                                                                                                                                                                                                                                                                                                                                                                                                                                                                                                                              |
| ENSMUST0000023292.1 | 1 | 138     | ENSMUSG0000022620.1 | CTGAGATCGACGCTGTCTACCACAGTTCCTCCTCAATTTGAAACC<br>GCCCTTGTCCCATGGCGCTGGAGCCTCCCGGTTCAATGTGAAGTGA<br>CTTCTGCTCCTGATCCCAAGCCTGTGCTGGCACCTCTGGGTGAACA<br><b>GGGT</b> CAGATCCCCGCTCGTGACGTTAATGAAGCCCTGGTCTTTAG<br>GGGCTCTGTGGAGTTACACCCAGGCCACCCCTTCCGAGTTCTGA<br>CAGATTCGCTGGAGCTTCAGAGAGTGGACCTACAGACAGAAGGATT<br>ATTTGGTCTGGCGGCTCAGGGGAGGAGGAGGCTCGGGACTGGGG<br>CCTCAGGTAGGGGCTGGCCCTGGGCGCTCAAGGAACGAGCTGTGG<br>AATCGCTCTGCCCTTCCCTACCAAGGACTGAGGACACAGGCCCATC<br>TGATCTCTGTC                                                                                                                                                                                                                                                                                                                                                                                                               |
| ENSMUST0000023426.1 | 1 | 20      | ENSMUSG0000022744.1 | GAGGAGGCGCGGGGAGAGT <b>AGGGT</b> GCTGTGGTTCGGAGCTGGAGGGC<br>GAAGCCGGTGGAGTGAAGAGTGGGCGAGCAGTCTGAATGCCAGA                                                                                                                                                                                                                                                                                                                                                                                                                                                                                                                                                                                                                                                                                                                                                                                     |
| ENSMUST0000023451.1 | 2 | 499,669 | ENSMUSG0000022767.1 | AGCTCAGAGAAGGACAACCGAGATGGCCGCTGCGGAAGCAGGAGCT<br>AGAAGAGCTGGTGGCTGGGCTGGAAGCCGAGAGCGAGCCTCACCC<br>GGGCGCTGGAGGAGCTGCGGGAGCGGAGCGCAGCCTGCAGCGGA<br>GACGAAGTCAAGCATCACAGCCATTTCGAGGCGAGGCAATGTGAGGC<br>GGCACGGGAGCGTGGGAGCGGGCTCGTGGGCTGCTGGAGCGCGC                                                                                                                                                                                                                                                                                                                                                                                                                                                                                                                                                                                                                                           |

|                      |   |          |                      |                                                                                                                                                                                                                                                                                                                                                                                                                                                                                                                                                                                                                                                                                                                                                                                                                                                                                                                                                                                                                                                                 |
|----------------------|---|----------|----------------------|-----------------------------------------------------------------------------------------------------------------------------------------------------------------------------------------------------------------------------------------------------------------------------------------------------------------------------------------------------------------------------------------------------------------------------------------------------------------------------------------------------------------------------------------------------------------------------------------------------------------------------------------------------------------------------------------------------------------------------------------------------------------------------------------------------------------------------------------------------------------------------------------------------------------------------------------------------------------------------------------------------------------------------------------------------------------|
| ENSMUST00000023465.1 | 1 | 44       | ENSMUSG00000022779.1 | GAGCAGCACCGGCAGGACCTGGTGCGGGCAAGAGCAAGAGGGCGCT<br>CCCCGGGTGGCTAGGCTGGAGGAGGGGCTAGACAGCCTGGACCCCT<br>GTTCCGAGGAGCAACACAATCGGAAGCTGCAGGAACAGTGGGAGGA<br>ACTGTCCAGTCAGCTTTTCTACTATGGAGGGGAGCAGCTAAGTCAA<br>CAGCGAGCGGAGCAGCAACTAGGGAACCAGCTTGTGGCGCTGCAGG<br>TACTTGGGGCGGGCTGTGGGCGGAGTATGGCTGTGGG <b>AGGGT</b> TAT<br>GTGCATTTGTGGGCAGAGTATCAGCCTTCAAGGCCGGGACCGAGC<br>CTCGAGGCCAGTGGTGTGCGAGGACTTCAGGTTCTTGACATCACT<br>TGAATCCTCCCGAAGAAACATCTGGAGCTGGCGGAGGCCAAATTC<br>GCATGCAGGCAGAGGACCTGCGGC <b>AGGGT</b> GCGCAGCGGACAGAGA<br>GGCCTGGGCCAGCTTCCAGGAGCAGAGTGGAGTCTGCAGGTGTGA<br>CCCCTCGTTTCTGACAGCGGTTCTCTTTCGAATGCCCTGCGGGCTC<br>GACTCTTTCTTCTTACTCTCTGACTCGCGATGTAGCGCATCTCT<br>GCCCTGAATCCCTATTGCCATCTTTCAGGAGCTGCAGGGGAAAGTG<br>CCGGAATGGTAGCAGCGCTCCGACCCGGGCGGGGGCGTGGGG <b>AGG</b><br><b>GT</b> CCTGCCCCGGCGGGCTTTTTCGCATCCAGCCCTCGCCGTGGG<br>GCCCTGGGCGGGCGGTGGAGCCCGGTTTGTGGGAGTGGCTCGCTT<br>TTCCACGAGCTCCCGCGGCCCGAGGAGTCAGCATTTGGCAGTCG<br>TGTTGAGCTACAGAGGAGACATTTCTAAGCTTTTATATGCTGCTG<br>TTCTGGGTCTGGGTGCAACGGTCTGTGGGCCCTGACAGCCAGGAGC<br>AAGA |
| ENSMUST00000023515.1 | 2 | 71,107   | ENSMUSG00000022817.1 | TGGCGGCCCGCAGGAGAGGGGGAGGAGAAAGCAGAGAAGAGTGGG<br>GGCTGGCGGCCGAGGAAAAGGG <b>AGGGT</b> CCTCCGAGAGTAGACCGG<br>CGGGGACTCGGCC <b>AGGGT</b> CGCTCCGAGCAGCGACAACCTCCGAGC<br>GTCCAGCGGGCCAGCGAGGAGGATGGTGGCGGGCGGGCGCGACC<br>AGCCCGGCCGCGGGCGCGTGGAGCCGAGCGCAGCGCCCGCATGC<br>GGCTGCGGTCCCGGCCCTCGGCCCGCTCCGCCCGCGGAGCGCC<br>CCAGCCGAGCGCGCGCATC                                                                                                                                                                                                                                                                                                                                                                                                                                                                                                                                                                                                                                                                                                                         |
| ENSMUST0000003321.1  | 1 | 26       | ENSMUSG00000022822.1 | GCCGCTATAAAGGCTTGTTTTGTCT <b>AGGGT</b> CCGATGTTTCGCGAGCG<br>TGCCCGGGCTGTTTGTCTCTCGTGTGGGGAGGCTGGGGTGCAGAATT<br>TCTGAAAGTAAAGGAGGAGTCTGCACCCCTGGTCTCTGTGTGGTGA<br>AG                                                                                                                                                                                                                                                                                                                                                                                                                                                                                                                                                                                                                                                                                                                                                                                                                                                                                             |
| ENSMUST00000051289.1 | 1 | 139      | ENSMUSG00000022863.1 | CGTTCGCCCTGTTCGGCCGCGCTCCGCCCGCCCGCCAGTCTGGTCCG<br>GCGCGCTCAGCGCGCGCGCGCGGCCCGGACGACGACGACAGCGG<br>CGCTCGCGCTCGGCTCCCGGCCACGGGACGCGGTTCGACCCCGCGG<br><b>AGGGT</b> GCAGCCCCGGAGCGCGCGCGCGCGGGGAAAAAA                                                                                                                                                                                                                                                                                                                                                                                                                                                                                                                                                                                                                                                                                                                                                                                                                                                             |
| ENSMUST00000023570.1 | 1 | 159      | ENSMUSG00000022863.1 | CGTGGGCGCGTTCGGACTGCGTTCGCCCTGTTCGGCCGCGCGCTCC<br>GCCGCCCGCCAGTCTGGTTCGGCGCGCGCTCAGCGCGCGCGCGCGG<br>GCCCGACGACGACGACGAGCGCGCTCGCGCTCGGCTCCCGGCCACG<br>GGACGCGTTCGACCCGGCG <b>AGGGT</b> GCAGCCCCGGAGCGCGCGCG<br>GCGCGGGAAAA                                                                                                                                                                                                                                                                                                                                                                                                                                                                                                                                                                                                                                                                                                                                                                                                                                      |
| ENSMUST00000057483.1 | 1 | 25       | ENSMUSG00000022951.1 | CGCAGTGAGGGAGGATGCGCAGT <b>AGGGT</b> TCCTTGACCTTTTCTTCT<br>TGAGTTCGGCACCCATAAGAAAACTGTATGTAAACTGCCCGTCGAT<br>GCACTTAGCTACAGTATGGAATGCTGGAGCATCAGAAGCTGTTAC<br>GCAGTTTCTTAGGGGAGGAACCGCTGATGGCCACAGCGCCCTGAAC<br>ACGGCTGA                                                                                                                                                                                                                                                                                                                                                                                                                                                                                                                                                                                                                                                                                                                                                                                                                                        |
| ENSMUST00000023731.1 | 1 | 138      | ENSMUSG00000022995.1 | GAGCCGGGGAGCGGGCCAGCGGACCATCTTACCCGCGTTCGGGTCCG<br>GCTTTCGGAGCGGGAGGCAGCGCGCGGAGAGCCGGGCGGAACCTGC<br>GGGGCGGAGGCGGGCGGTGGCAGCCGCGCGCAGGGAGCAGGAACA<br><b>GGGT</b> CAAGTCTCTCCATACCAAGGACCAGGCTAAAACAGATTACACT<br>TGCCCTCCCTGGGCCCTATTGACTTAAAGCAGCCACTGTAATCAT<br>G                                                                                                                                                                                                                                                                                                                                                                                                                                                                                                                                                                                                                                                                                                                                                                                             |
| ENSMUST00000053183.1 | 1 | 183      | ENSMUSG00000022995.1 | GTTCGCGTTCGCGGCTTCCGCTGCTAGGTTGGAGGGCGGGCAGGAGGG<br>AGCCGGGAGCGGGCCAGCGGACCATCTTACCCGCGTTCGGGTTCGG<br>CTTTCGGAGCGGGAGGCAGCGCGGAGAGCCGGCGGAACCTGCGG<br>GGGGCGGAGGCGGGCGGTGGCAGCCGCGCGCAGGGAGCAGGAACA <b>AG</b><br><b>GGT</b> CAAGTCTCTCCATACCAAGGACCAGGCTAAAACAGATTACACT<br>GCCCTCCCTGGGCCCTATTGACTTAAAGCAGCCACTGTAATCT                                                                                                                                                                                                                                                                                                                                                                                                                                                                                                                                                                                                                                                                                                                                          |
| ENSMUST00000041991.1 | 2 | 325,1323 | ENSMUSG00000023008.1 | TGCCCTCTGACAAGGCCCGGCTGCTGCGACAGTATGACAACGAGAA<br>GAAGTGGGATCTGATCTGTGACAGGAAAGATTTCAAAGTAAAGAA<br>CCTCCCCACACCTATATCCAGAACTCCAGAGCTTCTTGGACCCCA<br>ATGTAACACGGAAGAAGTTCCGGAGGAGAGTGCAGGAGTCCACTAA<br>AGTCTACGGGAGCTGGAGATCTCACTTCGCACCAATCACATTTGGG<br>TGGGTGAGGGAGTTTCTCAATGATGAGAACAAAGGCCCTGGACGTGC<br>TGGTGGATTACCTGTCATTTGCCAGTGTCTGTCATGTTGACTT<br><b>TAGGGT</b> CTGGAGAGTGGTGTATGACGGTGCATTTGACAGCTCCGG<br>TCCTGGAGCAGGTCAATCGAGGACCTGCAACCGCCCAACGCCCTGT<br>CGGCCCTTCACCAACAGCCTCGCTCGCTCTGCGCGTCAGTCCGT<br>GCTCCGGTACAGTACTCTCCCTGGCCGCGAGGCCCTGAAGAATCC<br>CGCCTGGTGAGCCAGAAGGATGACGTCCATGCTGTCATCTTTGTC                                                                                                                                                                                                                                                                                                                                                                                                                                             |

|                      |   |         |                      |                                                                                                                                                                                                                                                                                                                                                                                                                                                                                                                                                                                                                                                                                                                                                                                                                                                                                                                                                                                                                                                                                                                                                                                                                                    |
|----------------------|---|---------|----------------------|------------------------------------------------------------------------------------------------------------------------------------------------------------------------------------------------------------------------------------------------------------------------------------------------------------------------------------------------------------------------------------------------------------------------------------------------------------------------------------------------------------------------------------------------------------------------------------------------------------------------------------------------------------------------------------------------------------------------------------------------------------------------------------------------------------------------------------------------------------------------------------------------------------------------------------------------------------------------------------------------------------------------------------------------------------------------------------------------------------------------------------------------------------------------------------------------------------------------------------|
| ENSMUST00000038494.1 | 1 | 236     | ENSMUSG00000023022.1 | TCAGAGCCATCATGAACTATCAGTATGGCTTCAACTTGGTCATGTC<br>CCACCCCCACGCTGTCAATGAGATTCAGCTTAGCCTCAACAACAAG<br>AATCCAAGGACCAAGCCCTGGTCTTGGAGCTGCTGGCAGCTGTGT<br>GTTTGGTGCGGGGAGGTTCATGAAATCATCTGGCTGCCCTTGACAA<br>TTTCAAAGAGGTGTGTAAGAAGTGCATCGGTTTGAGAAGCTCATG<br>GAGTATTTCCGAAATGAGGACAGCAACATGACTTCATGGTGGCCT<br>GCATGCAGTTCATCAACATTTGTGGTGCAGCTCGGTAGAGGACATGAA<br>CTTCCGGGTCCACCTGCAATATGAGTTTACCAAGTTGGGGCTGGAG<br>GAATTCCTCCAGAAGTCGAGGCACACGGAGAGCGAGAAGTTGCAGG<br>TGCAGATTCAGCGTACCTGGACAATGTGTTTGACGTGGGGGGCTT<br>TGAACGACGGTGGACCAGGCACAGCTTGGAGTTTAACTTTCAGTT<br>TACAAAGACGCATGTTTGGCTGTTCAGCAGGCAAGTTGTAACCTGG<br>TACTTACTTCTGTTCCTCTAGAACCCTGAAAGTCTGCCACAGCAC<br>TTTAGAAGAGGGACCTGTCTGTGTTAAAGAAGAAGTTGGGAGAACC<br>CGGTGGCTGGGGCAGAAATCCACACAGACTCAC TGCCAAACAGCAG<br>CAGTCAAGGGTGGGCACACAGCGGACTACCTCCTGTGAAGTGACG<br>GACAAGCCTGTCTCGGAGTCAGAGCTGACCGGGAAGAGCACACCC<br>AGCCCAACCTAGATTTGGATCTCGTCCGGAAGCAGTTATCCAGAG<br>CCGGTATCCTCGCTCAGAGAACAGCCACGATTTTAAAGCCAGGCC<br>ACGGAGAGCCAAAA                                                                                                                                                                                                                                      |
| ENSMUST00000024619.1 | 2 | 335,896 | ENSMUSG00000023809.1 | AGCCCGCATCCGCGCCGAGGGCCGCGCTCGGGCTCCCGGCGCG<br>CGTGCCCGCCAGCGCGCTGCCTAGCCTGGGATGTGCCGGGATGCG<br>CGCCCGCCGCTCGCGCTCCAGCAGCTGGGCGCGGGCGATGG<br>AGCTGAGCATGAAGAAGTTCACGGTGGCAGGTTCTTCTCCGTGTA<br>CCTGCGCAAGAAGTTCGCGCTCCAAGAGCTCCAGTCTGAGTCCGCTC<br>GAGGAAGAAGGCATTTGTAAGGAGATTGACATTAGCAACCATGTGA<br>AGGAAGGCTTTGAGAAGGCAGACCCCTCCAGTTCGAGTACTAAA<br>GGTTTTAGGACAAGGGTTCGATGAAAGGTTCTTGGTGAGGAAG<br>GTTACAGGATCAGACGCTGGTTCAGCTCTACGCCATGAAGTCCGTA<br>AGAAAGCCACCTTGAAGTGCAGAGACCGGGTTCAGATCTAAGATGGA<br>GAGAGACATCCTGGCAGAGGTGAATCACCTTTTCAATGTCAGCTG<br>CATTATGCCCTTTCAGACCGAAGGCAAGCTCTACCTGATCCTGGACT<br>TCTGCGGGGAGGTGACCTCTTACCAGGCTTTCCAAAGTGGGTGAT<br>GTTACGAGGAGGATGTCAAGTCTACCTGGCTGAGCTGGCCTTG<br>GCTCTAGACCACCTCCATGGCTGGGATCATCTACAGGGATCTGA<br>AGCCAGAGAATATCTCTGGATGAAGAGGGACACATTAAGATCAC<br>AGATTTTGGCTTGAGCAAGGAGGCCACCGACCATGACAGAGAGCC<br>TATTCATTTCTGTGGACTATTGAATACATGGCGCCGAGGTGGTGA<br>ACCGCGTGGACACACAGAGTCCGACTGGTGGTCTTCCGCTGT<br>GCTCATGTTTCGAGATGCTCACAGGGTCCCTGCCATCCAGGGGAAG<br>GACAGGAAGGAAACAATGGCCCTCATCCTCAAAGCCAAGTGGGTA<br>TGCCCTCAGTTCCTCAGTGGGAGGCTCAGAGCCTGCTCAGGGCCCT<br>GGCTCCGAGAGTGACCTTTTTTCTTGGAAAAGCGGTGGCGAGAGA<br>AGTGAAGGTGGCTGTGGGTAGGGAGTCAAGACTCCTGGAAGGTGG<br>AGAGGGTGGCGGGAGG |
| ENSMUST00000024642.1 | 1 | 95      | ENSMUSG00000023865.1 | CTTATCTCCAGCTACAGGGTGGCCCTTTATCTCTCCAGCTTCGC<br>AGGACCCAACCTCCTGCTGAGCCTGAGCCTAGGACCCCTCCTGGG<br>GACGCCCAGGTACCTTTGGCTCTCACCCTCCTGCCAACATCGAGT<br>CTATAAATTTGCAAGAGCCAGAGGGAGGAGCTGCCAGCCAGGCAC<br>AGCCGAGAACACTGGAGCC                                                                                                                                                                                                                                                                                                                                                                                                                                                                                                                                                                                                                                                                                                                                                                                                                                                                                                                                                                                                             |
| ENSMUST00000024737.1 | 1 | 17      | ENSMUSG00000023942.1 | AGTCTCTGAGTTCAGGGTTTGGAGGCGCCACCTTTTGATCCTTCG<br>CTATGGGAGTGACGTGT                                                                                                                                                                                                                                                                                                                                                                                                                                                                                                                                                                                                                                                                                                                                                                                                                                                                                                                                                                                                                                                                                                                                                                 |
| ENSMUST00000056742.1 | 1 | 57      | ENSMUSG00000023983.1 | GCTTCTGTGTTTAGGGGGCCGCTTCGCGTGAAGGTCTGGAGTC<br>TCTGAGTTCAGGGTTTGGAGGCGCCACCTTTTGATCCTTCGCT                                                                                                                                                                                                                                                                                                                                                                                                                                                                                                                                                                                                                                                                                                                                                                                                                                                                                                                                                                                                                                                                                                                                         |
| ENSMUST00000024967.1 | 1 | 11      | ENSMUSG00000024151.1 | CGGCCAGCGCAGGGTTCGCTCTGTGCTCTAGTGGTGTGGTGGAG<br>CGGCTCGGAA                                                                                                                                                                                                                                                                                                                                                                                                                                                                                                                                                                                                                                                                                                                                                                                                                                                                                                                                                                                                                                                                                                                                                                         |
| ENSMUST00000063145.1 | 1 | 30      | ENSMUSG00000024181.1 | GAGGCGCGGGCGCGCTCTCCTAGAAGTAGAGGGTTCGCGCG                                                                                                                                                                                                                                                                                                                                                                                                                                                                                                                                                                                                                                                                                                                                                                                                                                                                                                                                                                                                                                                                                                                                                                                          |
| ENSMUST00000025014.1 | 1 | 30      | ENSMUSG00000024181.1 | GAGGCGCGGGCGCGCTCTCCTAGAAGTAGAGGGTTCGCGCG                                                                                                                                                                                                                                                                                                                                                                                                                                                                                                                                                                                                                                                                                                                                                                                                                                                                                                                                                                                                                                                                                                                                                                                          |
| ENSMUST00000025073.1 | 1 | 7       | ENSMUSG00000024231.1 | GAGCCGAGGGTGTGTGTCGCGAAAGCCAGAGCTCCGGAGGACGA<br>CAGCTCCCCGAGCCAGCTACCTGCCCTCCTCCTCCTTGCCTC<br>CTCGGCTGGCCGAGCGCATTTGTTTACTAGGCTCCTCCTGGGA<br>GCAGTTTCAACACTAAACTTGCACA                                                                                                                                                                                                                                                                                                                                                                                                                                                                                                                                                                                                                                                                                                                                                                                                                                                                                                                                                                                                                                                             |
| ENSMUST00000025133.1 | 1 | 41      | ENSMUSG00000024283.1 | ACCGCCGGCGCCAGTAACGGGGAGGTGCGCGAGCCCGCCAGGGT<br>CGCTGAGACTGGTCCCGGGCTGCCCGCCCGCCCGCCCGCCCG<br>CGCGCCCGCCGCTGCCTCGCGGCGCTCTCCCCCTCCCCGACAC<br>ACACACACAGCCGGCATTG                                                                                                                                                                                                                                                                                                                                                                                                                                                                                                                                                                                                                                                                                                                                                                                                                                                                                                                                                                                                                                                                   |
| ENSMUST00000025163.1 | 2 | 53,165  | ENSMUSG00000024309.1 | GGTTTATTGATTACAGCGGGTAGAGCGTGAAGAGGTTAGCGTTG<br>GCTTGGAGGGTTCGGGATCTCTTCTTTCGCTCCTTTGCTTAGG<br>GAGTGGCTATTCTGGACGAAAAGAGGCTCGGCGCCTCGGAGGTT                                                                                                                                                                                                                                                                                                                                                                                                                                                                                                                                                                                                                                                                                                                                                                                                                                                                                                                                                                                                                                                                                        |

|                      |   |       |                      |                                                                                                                                                                                                                                                                                                                                                                                                                                                                                                                                                                                                                                                                                                                                                                                                                                                    |
|----------------------|---|-------|----------------------|----------------------------------------------------------------------------------------------------------------------------------------------------------------------------------------------------------------------------------------------------------------------------------------------------------------------------------------------------------------------------------------------------------------------------------------------------------------------------------------------------------------------------------------------------------------------------------------------------------------------------------------------------------------------------------------------------------------------------------------------------------------------------------------------------------------------------------------------------|
| ENSMUST00000025186.1 | 1 | 155   | ENSMUSG00000024327.1 | GCGGGTAGAAAGTGTCTCTCTGC <b>AGGGT</b> CAGGGAGGGGGGATT<br>CAGGTGCCTCCAGAGCTTGAGACCCAGCGACCCCGCCAGGAGG<br>CTTCTCCTTCACC                                                                                                                                                                                                                                                                                                                                                                                                                                                                                                                                                                                                                                                                                                                               |
| ENSMUST00000056284.1 | 1 | 155   | ENSMUSG00000024327.1 | TCCCGGAGCCGGTGAGAGGTCCCTGCTGCTCCCTTACGGCGCTTTC<br>CAGGCCTTTACCCCAACCAGTGGGCCATAGAGACGCGGGCCAGAG<br>AGACCGTAAAGTTGCTGATCAAAGGCTAGAGCGGTGTCGGGGTGG<br>GGGGCTGCATCCAGGA <b>AGGGT</b> GTTGGGGATGAGGTGGACCGGCCTT<br>GGGGACAATGTAAGAGCGGAGCAAGTAGTATAGAGGAAGGGCTTCA<br>AGGGACGCGGATCCCGAATAGGTAGATTGAGAGTCAAGTCGAGTCCG<br>TCTCTGTCTCCTCCGGTCAGCGTG                                                                                                                                                                                                                                                                                                                                                                                                                                                                                                       |
| ENSMUST00000025295.1 | 1 | 63    | ENSMUSG00000024427.1 | GGCGCGCTGCGCACTGGAGCTCTCTGCCCTCCCATTCATAAAAA<br>GCCATTTTCCAGGCA <b>AGGGT</b> TGCAACATCGCCGCTGAGGCAGCGA<br>ACAGAGCTGACAGCGCGGAGCTGGCGCTGCAGGGCTCAGGGAGCTT<br>TGCCGGCTCCTCCGACTGACGCTCTGCGACTTCAACGGCGACTGACC<br>CACTCGGGTTCGGGGATTTACACAGACGTGGAGCGATGCTTGTGAC<br>TCTGCAGCTCCTCAAAGACCCCTAGAAGCTGTCCCTTGGTGCAGT<br>TCAGGACCTCCAGCCTC                                                                                                                                                                                                                                                                                                                                                                                                                                                                                                                |
| ENSMUST00000007183.1 | 2 | 47,62 | ENSMUSG00000024463.1 | CCTGTGAGATCCACATCCCATATCGTCACGTGCATTTCTACTGTCAA<br><b>AGGGT</b> TACAGTGGCT <b>AGGGT</b> CTGTGCCCTGTCTCACGGCAGCCCC<br>GAATGGTGCACCATGGCACCTGATATCTTAGGTCTTCTGGGTTC<br>ACCCACAATGCTGTCACTCGTGAACCTCAGTGTGAGTCATTGGCAA<br>GTCTTGGGTCTTCTTCTCCCCAGAGTAATCACACAGAGCGCTCAC<br>ACTCTCTCTCTGGGAGCCTGTGTGAGAATTAATTACCAGCACAT<br>CCCCGAAACTGGTGAAAGTCTGTGGCTGTAGGAGAATGTGTGGTGGGA<br>TACATCTCTGGAAAGGACCTGCGGAAGTTAGAAATTAAGCGGTGG<br>CTGGCGAGCCCTGCACATTTAGAGCTGGTTGGGAGAGGGCTACGGATC<br>AGTTGGCTCTGTCTGGAGCCTGTAGAAT                                                                                                                                                                                                                                                                                                                                      |
| ENSMUST00000025453.1 | 1 | 54    | ENSMUSG00000024563.1 | GGAGGAGCAGCTCGCCAAGCCTGCAGCTGCGGAGCGCCGAGCGAGC<br>CTCCCG <b>AGGGT</b> AGATTTACCGGCTTTTCTGAGTGTGGATTGTT<br>ACCTTGGTAAGAAA                                                                                                                                                                                                                                                                                                                                                                                                                                                                                                                                                                                                                                                                                                                           |
| ENSMUST00000025477.1 | 1 | 71    | ENSMUSG00000024584.1 | GAGTTCAGGGCAGCCCTGGCTACATAGAGAGACCCCTGTCTCAAAA<br>AGGAGGAGGAAGAGGAAAAAGAG <b>AGGGT</b> TGTGAAAGCCAGAAA<br>TGTTAGAGCATGATAAAGCAGGAATGTTACCAGGTGAAAGCTAGAC<br>TGAACTACAGAGATCCCCATCTCAACATAAAGAAGTGACACACTT<br>CCTCTACAAGGCCACACCCCAATCATGCCACTCCTGGGGCCATC<br>TACACTCAGACCGCTCCACTGTGGTAGCTCCTAAGATGTAGCTTCT<br>GCTCTGCACAGCTGACACTGCATTGCCCAAGCTCTTGAACAATTT<br>GAATTCAGAGGGACAATATGGAAAGATGGATCAAGTCGCAACTAGG<br>AGTTGACAGGTGCTGGTAACCAGTGCAGCGGTGGAGATGGCAACC<br>TCGCTGGGAACCGCTGGGGAGCCTGAGCCCGCAGCCGGAGACGCA<br>CTGCTCTTGTGCTCCACCGCCCGCCAGCCCGCGCAGACCCCTC<br>CATCTTCCATTTACGCTCCGGGCCAGGCTCGACCCTGCCCGGGGT<br>GGGGTAGGGAGCGGGCTCCCGCTTCTCTCGGGCTCCAGGTGCTTC<br>TCCACCCCGGGCCCTCTGCGACTCAATTGCTGGGTCCCCCTCC<br>CCCGCCACACACTCACACGCGCCCGCAGCACACAGCACAGCAC<br>ACAACACTCACACGCCAGCGGTGCTGGCCGCTCAATGGACCG<br>ATTTCCCGGTTTCCTGAACCCAGCCTAGCCCGG |
| ENSMUST00000025639.1 | 1 | 75    | ENSMUSG00000024732.1 | TACTGGCCAGAGACAAGAATCGTAAGAGTAAGGGAGCAGGGCATC<br>AGAGATTTAAGAAAATGACGTTGAATA <b>AGGGT</b> GGACCGTGCAGAG<br>CTCCGTGACGGCTCTTTACAGAAGTCATTTGTTATACTCTTAAAT<br>CCTAAGCGCAGGGGATAACCCCTCCCGCAAGCACACCCATTAAC<br>AGAGGAAAGTGAGGCTTAAAGAGAAAGGCACCAAGCGGAGAACTT<br>TGAAGCTGTTCTTTTCCCTGTCCGAGCAAACCAATACAGGCCA<br>CTGATGGCCACGGGTGA                                                                                                                                                                                                                                                                                                                                                                                                                                                                                                                      |
| ENSMUST00000025711.1 | 1 | 58    | ENSMUSG00000024797.1 | ACCCCTTTGAGTTGAGGTTGGAGCTATGGCGGCTGCGGACGCTGTG<br>GGGCTGGCCT <b>AGGGT</b> CCGGGCCCTGGAGACTCCCAGAAAGTCCCG<br>AGGCGGACGCTCCGGAGCGTCCGGCGGAAGGCTCACGGGATGCTGAA<br>GCTTTACTACGGCTCTCGAGGGGAGGTGGCGGGCATCCCGCA<br>GGGCTGACCCTCTGGACCAACCGATCTCAATGGGGCGCACTTCG<br>ACCCGGAAGTTATCTTGACAAGCTGCGTAGAGAATGTCTCTGGC<br>CCAGCTGATGGACAGTGAGACGGACATGGTACGGCAGATCCGGGCT<br>CTAGACAGGCACATGCAGACCCCTGGTCTATGAGAACTACAACAAGT<br>TCATCTCAGTACAGACACCATTCGAAA                                                                                                                                                                                                                                                                                                                                                                                                      |



|                      |   |        |                      |                                                                                                                                                                                                                                                                                                                                                                                                                                                                                                                                                                                                                                                                                                                                                                                                                                                                                                                                                                                                                                                                                                                                                                                                                                                                                      |
|----------------------|---|--------|----------------------|--------------------------------------------------------------------------------------------------------------------------------------------------------------------------------------------------------------------------------------------------------------------------------------------------------------------------------------------------------------------------------------------------------------------------------------------------------------------------------------------------------------------------------------------------------------------------------------------------------------------------------------------------------------------------------------------------------------------------------------------------------------------------------------------------------------------------------------------------------------------------------------------------------------------------------------------------------------------------------------------------------------------------------------------------------------------------------------------------------------------------------------------------------------------------------------------------------------------------------------------------------------------------------------|
| ENSMUST00000025749.1 | 1 | 53     | ENSMUSG00000024830.1 | GACGTAGGCACAGCCCGGTGCTGTCTAGTCAGAGTTCTGCCTGGTCC<br>GGGCCA <b>AGGGT</b> CCCGCGGACCCGGCGGGCC                                                                                                                                                                                                                                                                                                                                                                                                                                                                                                                                                                                                                                                                                                                                                                                                                                                                                                                                                                                                                                                                                                                                                                                           |
| ENSMUST00000025752.1 | 1 | 238    | ENSMUSG00000024833.1 | TCGCGCAAGCGCGCTAGGCAAAGCGTTTGGCGGGTTTTCCTGA<br>TGCTGTCTCCTCACGGAGAAGCTAAGGTGTAGTCTCGGAAGCAA<br>GTTTTCTCTCTGGATCGAGACCTCTCGAGGGCTTTTGAAGTATTTT<br>TCTGTGACCTGGTGGCTGGGGTCGTTTGAGGGCTTAGGCCAGGTGG<br>TCTCGTGACACGCTCCCTGTACCTTCCGGTAAAGCGAAAGGATAAG<br>CGTCTGC <b>AGGGT</b> AGAGCTGAGGTGCGGGCCCGCGGCAGGCGCCCG<br>GCCACTCCCGGGTCACC                                                                                                                                                                                                                                                                                                                                                                                                                                                                                                                                                                                                                                                                                                                                                                                                                                                                                                                                                     |
| ENSMUST00000040772.1 | 1 | 103    | ENSMUSG00000024965.1 | CCAGCAACAGCCCGCCCTGGGGAGGGACTAGTACAACCTTTCATGAT<br>AAGGCCACTACAGGCTGACCTCTGAAGGAAGCAACTGAGCAGGACC<br>AGGCCAGACC <b>AGGGT</b> AACAGGTGTCCCACTGCCACCTGACAGCTGCA<br>GCCCCTTGCAGGCTAGCAGAACAACAGCCCGAGCC                                                                                                                                                                                                                                                                                                                                                                                                                                                                                                                                                                                                                                                                                                                                                                                                                                                                                                                                                                                                                                                                                 |
| ENSMUST00000026252.1 | 1 | 146    | ENSMUSG00000025223.1 | CGGGGCTGTGACCCCGCGGGCGGGCGGAGGCTGTGCATGCGAGTC<br>TTTGTGCGGCTGCGGAGTGAGCTCCCAGCCAGACCGGCTGTCC<br>CACTCGGGACATGAGCTGTGAAGTTGGCTCCACCTTAGTCTCAC<br>CCTTGCC <b>AGGGT</b> CCCTGAGGACTCCCAGGCGTCCCCGCACCTCCC<br>CTGACCCCTCAGTCTCCAGGTTGTTCTCAAAGTCATTCAAGC<br>TGACTCGCCGAAGGAGCCCCGAACGGCAACGCCTTCCCTCCCTT<br>CCACCCCGGCACC                                                                                                                                                                                                                                                                                                                                                                                                                                                                                                                                                                                                                                                                                                                                                                                                                                                                                                                                                                |
| ENSMUST00000026254.1 | 1 | 332    | ENSMUSG00000025224.1 | CTGGAGGAAGCTGGTGACTCTGGGGCTGACAAAAAGTTTACCAGGA<br>AGCCACCTCGATTTTCTGTCTTCTGCCAGATCCACGGAACTAAT<br>TGAAATTA AAAACAAAAAAGCTGTGATCACTGGTACAGAGCAG<br>TTCAACAAAAACCAAGAAGGGGATCCAATTTCTGCAGGAGAAAG<br>GCCTCTCACCATCCCAATGGATAACACGGAGGTAGCCCAATGGCT<br>CCGAGAAAACCTCGGTTAGACAAAAAATGATTGGAGAGTTTGTG<br>AGTGACCGCAAAAACATGGACCTGTGGAGAGTTTGTGAGCACCT<br>TCAGCTTTC <b>AGGGT</b> TCGCGCTTGATGAAGCTCTCCGACTCTACCT<br>GGAAGCCTTCCGTTTGCCTGGGGAGCACCCGTTATTCACAGGTTG<br>CTGGAGGTATTCCTGAGCACTGGAGGAGTTGTAATGGCTCCCCAT<br>TTGCTAATAGTGATGCTTGTCTTCCCTGGCCTATGCTGCATCAT<br>GCTTAACACTGACCAACATAACCAATGTTGAAAGCAGAATGCA<br>CCCATGACCTGGAGGAATTTCCGAAAAACCTAAAAGGTGTGAATG<br>GAGCAAGGACTTTGAGCAAGACATCCTGGAAGACATGTACCATGC<br>CATCAAGAAATGAGGAGATTGTGATGCCCTGAGGAGCAGACAGGCTG<br>GTCCGTGAGAACTATGTGTGGAGCGTGTGCTTACCCGAGGTGCTA<br>GCCCTGAGGGCGTGTCTTCGAGTGCCTCCTGGCAGCTACGATCT<br>TGACCTTTCACTATGACCTGGGGCCCCACGATCGTGTCTCTCT<br>TATGTCTTCGATAAAAAGCCTTGAGGAGACCATCATCCAGAAAGCCA<br>TCTCAGGCTTCAGGAAGTGTGCCATGATCTCCGCCACTATGGCCT<br>CAGCGATGTGTTGACAATCTCATCATCTCTCTGTGCAAAATTCACA<br>GCTCTAAGTAGTGAGTCTATTGAGAACCCTCCAGTGTATTTGGAA<br>GGTAGCTTCTTCCCTGGTAGGTTCCGGAAGAGCCGCGACTCCTTG<br>GGCGTTA <b>AGGGT</b> TCGCGCGCCGC <b>AGGGT</b> CGTTTCAGCCGAGCACTT<br>GGCGTCCCCTCGAGCTCGAGATCTGTGAACAGCCACC |
| ENSMUST00000026387.1 | 2 | 53,69  | ENSMUSG00000025337.1 | GTCCCTCCTGTCCAGCTCGGGCTCCGGCGCCCTGCTCTGACCGT<br>GCGCTCTCTGGGTCAAGGTAGAGCCCCCGGAGCCCCGTGCCACT<br>CGCACACTTCGCACCCCGCCAAAAGGGCAGCGGAAGGGCGCCGC<br>CACCGACTGGGTGAGGGCTGCGGCTCCAGAGAAGGAAGCGTTGAC<br>AGCTGGAAGCTGCTGTGA <b>AGGGT</b> TGCGCTGGGACTCCGGGACT<br>GCCGTAGCGCTGCACAAGACGCAAGACCCGGGCTAACCTCTGAAA<br>AACAAAGAAGCTGTAATACTACCAGGCTGTCTCTGTGATCAACTTCAGGA<br>AGAGAAGAAGG                                                                                                                                                                                                                                                                                                                                                                                                                                                                                                                                                                                                                                                                                                                                                                                                                                                                                                          |
| ENSMUST00000026414.1 | 1 | 205    | ENSMUSG00000025357.1 | GGCGGCAACATTTGTTTCAAGTTGGACAAAATGTCAAGGGCTGAGCT<br>CTCCTTGCCTTCCATCCCAGCTGGGACTGCCGTGCTCACCCGGGG<br>TCCCCCAGGTCTCCGCTCCGAGTGTGCGGCCCGCTTTTCGT <b>AGGG</b><br><b>T</b> TCCCGGGCCCGCTCCCGGGGCTGAGCCCGCTCACTAGCGCTC<br>C                                                                                                                                                                                                                                                                                                                                                                                                                                                                                                                                                                                                                                                                                                                                                                                                                                                                                                                                                                                                                                                                |
| ENSMUST00000026416.1 | 1 | 135    | ENSMUSG00000025358.1 | GGGGTCCCTCGCTGCCTCGGAGGCGCTCCTAAAGCTGCCTGCTCGCG<br>CGAGAGTTTGGAGGGGGGGGCTT <b>AGGGT</b> CAGTTTTCGGTGGGGGGCT<br>CGCAGGGACCCCTCAGATCTCCGCTTAGGTGCCAGTTAAGTCCGG<br>GAAGCTGGGCCAGGCGGTCACTGGCCACCCTGAACCTGGCGGGAGC<br>CGGAGCGCTCTGGAGAAGCCGGGACAGCCCGTTTTCAGCCAGCAG<br>CTGCT <b>AGGGT</b> TGGGACCCACAGAAAAAAGTGAAGTCCGGCTGCTG<br>TTTCCAGAGCCTGGGCCACGGCGGCGCTGGGAGCAGAGGTGGA<br>GCGACCCTGTTACACTAAAG                                                                                                                                                                                                                                                                                                                                                                                                                                                                                                                                                                                                                                                                                                                                                                                                                                                                                     |
| ENSMUST00000026446.1 | 2 | 70,236 | ENSMUSG00000025381.1 | GGCCGAGCGTCTCTGTACTCCGAGTGATCGCTCTACCGTGGCTG<br>CCGGGGCTGGTATTTCAAAGCGTGGTGGTGAAGTCCGTGAAGC<br>ATAGCCCG <b>AGGGT</b> TGGGGAGCAGTGTCTGAGTTCCTCGCTCACT<br>GGTGTTCCTAGTCTCAAAGCTGGCTCAGGGACGCCAGGAGGCAG                                                                                                                                                                                                                                                                                                                                                                                                                                                                                                                                                                                                                                                                                                                                                                                                                                                                                                                                                                                                                                                                                 |
| ENSMUST00000026584.1 | 1 | 100    | ENSMUSG00000025510.1 | GGCCGAGCGTCTCTGTACTCCGAGTGATCGCTCTACCGTGGCTG<br>CCGGGGCTGGTATTTCAAAGCGTGGTGGTGAAGTCCGTGAAGC<br>ATAGCCCG <b>AGGGT</b> TGGGGAGCAGTGTCTGAGTTCCTCGCTCACT<br>GGTGTTCCTAGTCTCAAAGCTGGCTCAGGGACGCCAGGAGGCAG                                                                                                                                                                                                                                                                                                                                                                                                                                                                                                                                                                                                                                                                                                                                                                                                                                                                                                                                                                                                                                                                                 |

|                     |   |          |                     |                                                                                                                                                                                                                                                                                                                                                                                                                                                                                                                                                                                                                                                                                                                                                                                                                                                                                                                                                                                                                                                                                                                                      |
|---------------------|---|----------|---------------------|--------------------------------------------------------------------------------------------------------------------------------------------------------------------------------------------------------------------------------------------------------------------------------------------------------------------------------------------------------------------------------------------------------------------------------------------------------------------------------------------------------------------------------------------------------------------------------------------------------------------------------------------------------------------------------------------------------------------------------------------------------------------------------------------------------------------------------------------------------------------------------------------------------------------------------------------------------------------------------------------------------------------------------------------------------------------------------------------------------------------------------------|
|                     |   |          |                     | AGCCTGAGATCTGGTGGCTCTGAGAACCATTTTGACCACTGCTTAA<br>GCTTCTGTAGTTGGAGTGGCAAGATCCACCTGCTAGGTGAAGGGC<br>AGAGAGTGACTTTTGACCTGTACCTGCTGGTCCCTGACTTGAGAGGC<br>CCAGG                                                                                                                                                                                                                                                                                                                                                                                                                                                                                                                                                                                                                                                                                                                                                                                                                                                                                                                                                                          |
| ENSMUST0000026666.1 | 1 | 52       | ENSMUSG0000025579.1 | ACAGACCACGTGACCCACGCTGCCCGCTGAGCCTGGGGGTCTTCGG<br>CCTGG <b>AGGGT</b> GATTGCGCAGGCCCTCAGAAGTATTCATGCTGCCCC<br>GAACCAACAGGCTTTCACC                                                                                                                                                                                                                                                                                                                                                                                                                                                                                                                                                                                                                                                                                                                                                                                                                                                                                                                                                                                                     |
| ENSMUST0000059097.1 | 1 | 24       | ENSMUSG0000025647.1 | AGATTCGATTTCCCTTTCTTTGAA <b>AGGGT</b> AGGAGATTGAAACTGAG<br>TGGCCTCTGATGAAAAGAGGGGAAGTCCCTGGGCTGCAGGAGCCCTT<br>TGAGTGAAGGCGGAGGCTAACATGGGG                                                                                                                                                                                                                                                                                                                                                                                                                                                                                                                                                                                                                                                                                                                                                                                                                                                                                                                                                                                            |
| ENSMUST0000058351.1 | 1 | 1365     | ENSMUSG0000025791.1 | CTGAGCCCTCTGCAGCAGCCAGACCCGAGCCACTGTGCGCTCGCA<br>GCCAACCCACCACATGGTGAAGATCGTGCAGTGAAGACGCAGGCA<br>TATCCGGATCAGAAGCCGGGCACCAGCGGATTGCGGAAGCGAGTGA<br>AGGTTTCCAGAGCAACGCCAATATGCGGAGAATTTTCATCCAGAG<br>CATCGTCTCTACCGTGGAGCCGGCGCTGAGGCAGGAGGCCACGCTG<br>GTTGTGGGCGGGGACGGCCGCTTCTACATGACCCAGGCCATCCAGC<br>TCATCGTACGCATCGCTGCAGCCAACGGGATTGGTTCGCTGGTTAT<br>TGGGCAGAAATGGAATACTCTCCACCCCTGCCGTATCTTGCATATC<br>CGAAAAATCAAAGCTATTGGTGGGATCATTTCTGACAGCCAGCCATA<br>ATCCAGGAGGGCCCAATGGAGATTTTGGAAATTAATTCATATTTTC<br>TAATGGGGTCTCTGCTCCAGAAGCAATCACTGATAAAAAATTTCCAA<br>ATCAGCAAGACAATCGAAGAATAATGCCATTTGCCCTGACTTGAAGG<br>TAGACCTCGGTGTTCTGGGAAAGCAGCAGTTTGACTTGGAAAACAA<br>GTTCAAGCCCTTCAAGTGGAGATTGTGGACTCAGTGGAGGCCAT<br>GCCAATGCTGAGAAACATCTTCGATTTCAACGCACTGAAGGAGC<br>TACTCTGGTCCAAACAGACTGAAGATCCGCATAGACGCCATGCA<br>CGGAGTTGTGGGACCGTACGTAAGAAGATCCTCTGTGAAGAAGT<br>GGTGGCCCTGCAAACTCAGCTGTGAAGTGTTCCTCCCTGGAGGATT<br>TTGGAGGCCACCATCCCGACCCCAATCTCACCTATGCTGCTGACCT<br>AGTGGAGACCATGAAGTCAAGTCAAGGAGAGCATGATTTGGGGCTT<br>GATGGTGACGGGGATCGAAACATGATTTCTGGGCAAGCACGGGTTCT<br>TTGTGAATCCTTCTGACTCTGTGGCTGTATCGCTGCCAACATCTT     |
| ENSMUST0000026987.1 | 1 | 75       | ENSMUSG0000025869.1 | GCGCGCACGGGTGGACGGAGACTATTAACACCGCGCTCTGAGAGCG<br>TGTTCTTGAGTTTGAGCTGCTGTTTCA <b>AGGGT</b> TTGAGCTGCTGTT<br>GGGCGAGTTAGCGAG                                                                                                                                                                                                                                                                                                                                                                                                                                                                                                                                                                                                                                                                                                                                                                                                                                                                                                                                                                                                          |
| ENSMUST0000027035.1 | 2 | 733,1020 | ENSMUSG0000025902.1 | CCCATTTAGTGAAGAAACTGAAATATGGCCCACTCACACTGCTGGC<br>GGGTCTGAAGTGCAGTTGGCCCCAACACTCCCTCCCAAAGTATCTAT<br>CAAGAGAATGGTCAGCAGAAGTTAGATCTAGTTTTTAGAGAAATCA<br>ACCAAGACAGGGAAGACAGAGAAAATGCATTTCTGGACCCCTG<br>TTTTCAATCGTCAATTTCAAACAAAACCCGATGTTATTTAAAAAAA<br>AAAAAACACGGAAGAGAAAATTAGGCCCTGAGATCTTTGAAAAG<br>ATGCCATTAAGTATACAAAAGAGAAGAGTCACTGTGGAGGTGAG<br>GGACTGCGTCCCTGCTTCTGAGAGGCAGGAGAGTACATGGGGAGA<br>CTGTCTCAAACTAACACAGAAGAGATAGAATTTTTTTTTTCTTA<br>AAGAGCACCTGGCTAGAGAAATCGATTTGTAAAATGCTATTTCTAC<br>CCTTAGAGTTTCTTGATTAACATCTGAAATGCATTTTTTTTGT<br>TTACTTTCAAGCTAATGTTTTTTCAGAAAAAATAAAAAGCTTTGAG<br>GAAAAGCACATTATCAGTTAGATTTAAGACCAATTGCTTTTAAAT<br>ACCAATTTAAATATCATTTTTTTTATTTCTTAAAGCAGATTTAAT<br>TTTACCCCTTTGTATGAATCTTACAGACTGGAGTTTAACTACT<br>ATCACTGATCTCTACACACAACCTCCAGCTTTAAATGGGAGGG <b>AGG</b><br><b>GT</b> CACCACCTGCTTTATAACATAACAATTAGAGAAAAGCTGGCTTC<br>TGTATGAGTTCTTTGGAGACAAAGTAGCTCCAGAACTGCAGACCA<br>GAAGTATCAAAATCTCTGTGCTTTTTTGGAACTCCAGTAAGCCA<br>GATTTGGTCTCTGAAATAATACAGGAAAACCTCAGCATGTCACCTC<br>ATGGATACAATGAGCAGCACCTCCAGACATCTGAATTTTCAGCCTTC<br>CTATTTCCCAAGAGGCTTTGGCGCCAGGCCCCGGCTCCAGCCAGT |
| ENSMUST0000055098.1 | 1 | 187      | ENSMUSG0000025902.1 | CTGAAGTGCAGGTGGCCCCAACACTCCCTCCCAAAGTATCTATCAAG<br>AGAATGGTCAGCAGAAGTTAGATCTAGTGCAGCAGCCTCCAGACA<br>TCTGAATTTAGCCTTCTTATTTCCCAAGAGGCTTTGGCGCCAGC<br>GCCCGGCTCCAGCCAGTTTTTCCCAAGGCTAGCTTCCGATCCCTGC<br>CTC <b>AGGGT</b> CGGGGGAAGCGGCGTGTCCCGTGGCCATAGCAGAGCTC<br>GGGTCGGTCTGGAGAGCC                                                                                                                                                                                                                                                                                                                                                                                                                                                                                                                                                                                                                                                                                                                                                                                                                                                  |
| ENSMUST0000027111.1 | 1 | 61       | ENSMUSG0000025968.1 | TTTCCGCTCCTCCAGGTCCGGCTGACAGAGGTTGCCGTGGCCGCCAT<br>ATTGACTTAGCGGCC <b>AGGGT</b> TTTGGAGGGTTCAGGAGACCCGGACA<br>GGTCCGCGGAACACTCGGTGGGCTCCGGAGGAAAGCCATC                                                                                                                                                                                                                                                                                                                                                                                                                                                                                                                                                                                                                                                                                                                                                                                                                                                                                                                                                                               |
| ENSMUST0000027195.1 | 1 | 73       | ENSMUSG0000026034.1 | ATCGTCGTAATCGTTTGCAGACTTCTCGCGCTGCCTTGTAAAGCTT<br>TGCTTTCGCTTGAAGCTTTGTCTT <b>AGGGT</b> TGGAAAG                                                                                                                                                                                                                                                                                                                                                                                                                                                                                                                                                                                                                                                                                                                                                                                                                                                                                                                                                                                                                                      |
| ENSMUST0000027298.1 | 2 | 11,191   | ENSMUSG0000026124.1 | CAGGACTGTAT <b>AGGGT</b> CAGCACTTCCAGCCTGGTGGTTCAGAGCTC<br>CTGACCTGAGAGGGCTTCAACACCTGGACTCCAGGATCTTCTTTA                                                                                                                                                                                                                                                                                                                                                                                                                                                                                                                                                                                                                                                                                                                                                                                                                                                                                                                                                                                                                             |

|                     |   |                 |                     |                                                                                                                                                                                                                                                                                                                                                                                                                                                                                                                                                                                                                                                                                                                                                                                                                                                                                                                                                                                                                                                                                                                                                                                                                                                                                                                                                                                                                                                                                                                                                                                                                                                                                                                                                                                                                                                                                                                                                                                                                                                                                                                                                                                                                                                                                                                                                                                                                                                                                                                                                                                                                                                                                                                                                                                                                                                                                                                                                                                                                                                                                                                                                                                                                                                                                                                                                                                                                                                                                                                                                                                                                                                                                              |
|---------------------|---|-----------------|---------------------|----------------------------------------------------------------------------------------------------------------------------------------------------------------------------------------------------------------------------------------------------------------------------------------------------------------------------------------------------------------------------------------------------------------------------------------------------------------------------------------------------------------------------------------------------------------------------------------------------------------------------------------------------------------------------------------------------------------------------------------------------------------------------------------------------------------------------------------------------------------------------------------------------------------------------------------------------------------------------------------------------------------------------------------------------------------------------------------------------------------------------------------------------------------------------------------------------------------------------------------------------------------------------------------------------------------------------------------------------------------------------------------------------------------------------------------------------------------------------------------------------------------------------------------------------------------------------------------------------------------------------------------------------------------------------------------------------------------------------------------------------------------------------------------------------------------------------------------------------------------------------------------------------------------------------------------------------------------------------------------------------------------------------------------------------------------------------------------------------------------------------------------------------------------------------------------------------------------------------------------------------------------------------------------------------------------------------------------------------------------------------------------------------------------------------------------------------------------------------------------------------------------------------------------------------------------------------------------------------------------------------------------------------------------------------------------------------------------------------------------------------------------------------------------------------------------------------------------------------------------------------------------------------------------------------------------------------------------------------------------------------------------------------------------------------------------------------------------------------------------------------------------------------------------------------------------------------------------------------------------------------------------------------------------------------------------------------------------------------------------------------------------------------------------------------------------------------------------------------------------------------------------------------------------------------------------------------------------------------------------------------------------------------------------------------------------------|
| ENSMUST0000027344.1 | 3 | 387,406,64<br>8 | ENSMUSG0000026159.1 | <p>ACCCTGCTGTCTCTGGTCCAGGCAGAGGGCAGAGACATCTTCATCT<br/>TGCAAGACTGTGCATCCTGTAACCTGCTATAGTGATTCCAAGACCT<br/>GGAGTAA<b>AGGGT</b>GCCTCCGGGGCTAGGATATTTGAGTTTCAACTTC<br/>TGTGGTCATCGATCCCCAAGCACAG</p> <p>GGCGGTGTCCCGCCCGCCGGTTGGTGTGACCGGTTCGGCGCGTGC<br/>TGCAGCTTCTCGCTTGTCTGCCCGGGAGCCGAGCGGAGG<br/>CCGAGACCGGAGTCCGCGAGGGCGGAGCGCGCGCCGAGGGCGG<br/>CCCGTGGGAAGGGAGCGCGGGGCCCGGCAGCGCCCGGCTCCCG<br/>GCCCTGCCCGCTTCTCGGTCCGAGCCCGGCCATGGCGGCCAGCG<br/>CGAAGCGGAAGCAGGAGGAGAAGCACCTGAAGATGCTGCGGGACAT<br/>GACGGGGCTGCCGACAACCGCAAGTGTTCGACTGCGACCGCGC<br/>GGCCCCACCTACGTGAACATGACGGTCCGGTTCGTGTCACCT<br/>CCTGTCCCGCAGCCTGAG<b>AGGGT</b>TAAATCCACCTCA<b>AGGGT</b>GAA<br/>ATCTATCTCCATGACAACATTTACACAACAGGAAATTTGAATTCCTA<br/>CAAAAACATGGAAATGAAGTCTGCAAAACAGATATGGCTAGGATTTAT<br/>TTGATGACAGATCTTCAGCAATTCAGACTTCAGGGATCCCAAAA<br/>AGTGAAAGAGTTTCTACAAGAGAAATATGAAAAGAAAAGATGTTAT<br/>GTTCCGCCAGAGCAAGCCAAAGTGGTGGCTCCGTTTATGCGTCTA<br/>TTTT<b>AGGGT</b>CTTCTGCCAGCAGCACAAAGCAGCACCCCGGAGGTC<br/>AATAAGGGCACACCTAGTCAGTCCCAAGTTGTAGGTCCGCTCTCAAG<br/>GGCAGCAGCAGGAGAAGAAGCAGTTTGACCTTTTGAGTGATCTTGG<br/>CTCAGACATCTTTGTGCTCCAGCTCCTCAGTCAACAGCTACAGCC<br/>AATTTTGTCTAACTTTGCACACTTAACAGTCAATGACGCTCAGAA<br/>TGTTGCAGAAATCCAGTTTTCGAACGTGTCTTTCGCTGTGGCTCGG<br/>CTCTCGGACATTAGGGGAGGCTTCTGAGGG<b>AGGGT</b>CGAGTGACGA<br/>GGCTTGGTGTGCGTGTCTAGTAGTTCCGTTGGGTAGACTCTGACTGG<br/>TAACTCCTGGACTCGAATTTGGGTCTTGGTGTCTCCATTTCACTCC<br/>TGAAGATCCTCACGTATTTACCGCAGAACTGATTTGTGGGAGCGGG<br/>TAAAGGCTGAAGGGCATTTCTGCGTGGGGATGGCCAAACCGGCTGG<br/>CGATCGCGCAGTAGGATCTCGTTCGAGAGATTGTTCTGCCCTCC<br/>GTTTCTTCTTCAGCCACGTCGCCAGCTCCAAGTGCAGCCTCAGCCC<br/>CTGCCCTCCGTTTCCCTGTTGTCCCTCAACGGGGAAGCTCCACTCAT<br/>TCGGGGCTGAGCCTGGTGGCCAAAGCTCCTGGGGAGGCTCTGGCC<br/>TGGGCGCCCGGTACTTCCGTCCAGGAGAGAACAACAGCTCGGGGG<br/>GAAAAGTATCTCCATATTTCTGGAATTTTCAGAGAAATTTATTTG<br/>TTCAGCCTGTGACCAGATCTTCCAGAACCACCAGGAACAGGAGAA<br/>CATTATAAGCTTGATTTGGCATCGCTTTAACTTAAAACAACGTCTCA<br/>AGAACAAGCCTCTCCTGTCTGCTTCAGACTTTGAACAGCAAAGCTC<br/>CACAGGTGATGCTTGTACCCGGGAAGCCTGCCTGGGAGCAGGGCGG<br/>GCTGGGGAGGACCCCTGTGGGGCTTGAGGAAAGGTCACAGGTGAGT<br/>ACCAAACCTGCAGGGCCCATATTTGTCTTCAGGGGATCTTTCCAGC<br/>ATCTCAGGATCAGATGACACAGACTCCAGCAGTGAAGAGGACTTGC<br/>TGCCACTGGATGAGGGGAGGGCTGAATCCGAGAAACCTAACCGGCC<br/>CCCGGATTTCAACCACATCGGGTCTTTTCAAAAACGCCAGGGC<br/>CAGTTTCTTTATGCCTATCGTTGTGCTCAGGCCCTCACCAGGCAA<br/>GGTCTTGCCTGTGGCTCGGCTCTCGGACATTAGGGGAGGCTTCTG<br/>AGG<b>AGGGT</b>CGAGTGACGAGGCTTGGTGTGCGTGTAGTTCGG<br/>TTGGGTAGACTCTGACTGGTAACTCCTGGACTCGAATTTGGGCTTTG<br/>GCGCTCTCCATTTCACTCCTGAAGATCCTCACGTATTTACCGAGA<br/>ACTGATTTGTGGGAGCGGGTAAAGGCTGAAGGGCATTTCTGCGTGG<br/>GGATGGCCAAACCGGCTGGCGATGCGGCAGTAGGATCTCGTTCGG<br/>AGAGTTGTTCTGCCCTCCGTTTCTTCTCAGCCACGTCGCCAGCT<br/>CCAAGTGCAGCCTCAGCCCTGCCCTCCGTTTCCCTGTTGTCCCTCA<br/>ACGGGGAAGCTCCACTCATTCGGGGCTGAGCCTGGTGGCCAAAGC<br/>TCCTGGGGAGGCTCTGGCCGCGCGCGGTACTTCTGTCCAGGA<br/>GAGAACAAGCTCGGGGGAAAAGTATCTCCATATTTCTTGGAAA<br/>TTTCAGAGAAATTAATTTGTTCAGCCTGTGACCAGATCTTCCAGAA<br/>CCACCAGGAACAGAGAGAACATTAAGCTTGATTTGGCATCGCTTT<br/>AACTTAAAACAACGCTCTCAAGAAACAGCCTCTCCTGTCTGCTTCAG<br/>ACTTTGAACAGCAAAGCTCCACAGGGGATCTTTCCAGCATCTCAGG<br/>ATCAGATGACACAGACTCCAGCAGTGAAGAGGACTTGTCCCACTG<br/>GATGAGGGGAGGGCTGAATCCGAGAAACCTAACCGGCCCGGGAT<br/>TCTACCCACATCGGGTCTTTTCAAAAACGCCAGGGCCAGTTTCT<br/>TTATGCCATATCGTTGTGCTTAGGCCCTCACCAGGCAAGTAAACGT<br/>CCAGATTTGTGTGCTCACTCCCAACTTTTGTATACTAGGTTTCTC<br/>AGCCAATGTATGCTTATTTTCTTCTTTTGTAGTAAGGCTATATCA<br/>TACCTGACAGCATAATCTTGAAC<b>AGGGT</b>GGCCAGAACTTGAATGGGTCA<br/>CTTCCGACAGGCCGAGACCGGTCGGTGTGGAGTTTGTAGTGGCAG<br/>ACCTGTGCTCGTTCCGAGCCAGCG<b>AGGGT</b>GGACTCGGCCAGAGG<br/>TGGGCTCGAGCCCGCACCTCTCGCCCGCCACCCATGCCTGACC</p> |
| ENSMUST0000027397.1 | 1 | 77              | ENSMUSG0000026199.1 | <p>TGTTGCAGAAATCCAGTTTTCGAACGTGTCTTTCGCTGTGGCTCGG<br/>CTCTCGGACATTAGGGGAGGCTTCTGAGGG<b>AGGGT</b>CGAGTGACGA<br/>GGCTTGGTGTGCGTGTCTAGTAGTTCCGTTGGGTAGACTCTGACTGG<br/>TAACTCCTGGACTCGAATTTGGGTCTTGGTGTCTCCATTTCACTCC<br/>TGAAGATCCTCACGTATTTACCGCAGAACTGATTTGTGGGAGCGGG<br/>TAAAGGCTGAAGGGCATTTCTGCGTGGGGATGGCCAAACCGGCTGG<br/>CGATCGCGCAGTAGGATCTCGTTCGAGAGATTGTTCTGCCCTCC<br/>GTTTCTTCTTCAGCCACGTCGCCAGCTCCAAGTGCAGCCTCAGCCC<br/>CTGCCCTCCGTTTCCCTGTTGTCCCTCAACGGGGAAGCTCCACTCAT<br/>TCGGGGCTGAGCCTGGTGGCCAAAGCTCCTGGGGAGGCTCTGGCC<br/>TGGGCGCCCGGTACTTCCGTCCAGGAGAGAACAACAGCTCGGGGG<br/>GAAAAGTATCTCCATATTTCTGGAATTTTCAGAGAAATTTATTTG<br/>TTCAGCCTGTGACCAGATCTTCCAGAACCACCAGGAACAGGAGAA<br/>CATTATAAGCTTGATTTGGCATCGCTTTAACTTAAAACAACGTCTCA<br/>AGAACAAGCCTCTCCTGTCTGCTTCAGACTTTGAACAGCAAAGCTC<br/>CACAGGTGATGCTTGTACCCGGGAAGCCTGCCTGGGAGCAGGGCGG<br/>GCTGGGGAGGACCCCTGTGGGGCTTGAGGAAAGGTCACAGGTGAGT<br/>ACCAAACCTGCAGGGCCCATATTTGTCTTCAGGGGATCTTTCCAGC<br/>ATCTCAGGATCAGATGACACAGACTCCAGCAGTGAAGAGGACTTGC<br/>TGCCACTGGATGAGGGGAGGGCTGAATCCGAGAAACCTAACCGGCC<br/>CCCGGATTTCAACCACATCGGGTCTTTTCAAAAACGCCAGGGC<br/>CAGTTTCTTTATGCCTATCGTTGTGCTCAGGCCCTCACCAGGCAA<br/>GGTCTTGCCTGTGGCTCGGCTCTCGGACATTAGGGGAGGCTTCTG<br/>AGG<b>AGGGT</b>CGAGTGACGAGGCTTGGTGTGCGTGTAGTTCGG<br/>TTGGGTAGACTCTGACTGGTAACTCCTGGACTCGAATTTGGGCTTTG<br/>GCGCTCTCCATTTCACTCCTGAAGATCCTCACGTATTTACCGAGA<br/>ACTGATTTGTGGGAGCGGGTAAAGGCTGAAGGGCATTTCTGCGTGG<br/>GGATGGCCAAACCGGCTGGCGATGCGGCAGTAGGATCTCGTTCGG<br/>AGAGTTGTTCTGCCCTCCGTTTCTTCTCAGCCACGTCGCCAGCT<br/>CCAAGTGCAGCCTCAGCCCTGCCCTCCGTTTCCCTGTTGTCCCTCA<br/>ACGGGGAAGCTCCACTCATTCGGGGCTGAGCCTGGTGGCCAAAGC<br/>TCCTGGGGAGGCTCTGGCCGCGCGCGGTACTTCTGTCCAGGA<br/>GAGAACAAGCTCGGGGGAAAAGTATCTCCATATTTCTTGGAAA<br/>TTTCAGAGAAATTAATTTGTTCAGCCTGTGACCAGATCTTCCAGAA<br/>CCACCAGGAACAGAGAGAACATTAAGCTTGATTTGGCATCGCTTT<br/>AACTTAAAACAACGCTCTCAAGAAACAGCCTCTCCTGTCTGCTTCAG<br/>ACTTTGAACAGCAAAGCTCCACAGGGGATCTTTCCAGCATCTCAGG<br/>ATCAGATGACACAGACTCCAGCAGTGAAGAGGACTTGTCCCACTG<br/>GATGAGGGGAGGGCTGAATCCGAGAAACCTAACCGGCCCGGGAT<br/>TCTACCCACATCGGGTCTTTTCAAAAACGCCAGGGCCAGTTTCT<br/>TTATGCCATATCGTTGTGCTTAGGCCCTCACCAGGCAAGTAAACGT<br/>CCAGATTTGTGTGCTCACTCCCAACTTTTGTATACTAGGTTTCTC<br/>AGCCAATGTATGCTTATTTTCTTCTTTTGTAGTAAGGCTATATCA<br/>TACCTGACAGCATAATCTTGAAC<b>AGGGT</b>GGCCAGAACTTGAATGGGTCA<br/>CTTCCGACAGGCCGAGACCGGTCGGTGTGGAGTTTGTAGTGGCAG<br/>ACCTGTGCTCGTTCCGAGCCAGCG<b>AGGGT</b>GGACTCGGCCAGAGG<br/>TGGGCTCGAGCCCGCACCTCTCGCCCGCCACCCATGCCTGACC</p>                                                                                                                                                                                                                                                                                                                                                                                                                                                                                                                                                                                                                                                                                                                                                                                                                                                                                                                                                                                                                                                                                                                                                                                                     |
| ENSMUST0000058770.1 | 1 | 50              | ENSMUSG0000026199.1 | <p>GGTCTTGCCTGTGGCTCGGCTCTCGGACATTAGGGGAGGCTTCTG<br/>AGG<b>AGGGT</b>CGAGTGACGAGGCTTGGTGTGCGTGTAGTTCGG<br/>TTGGGTAGACTCTGACTGGTAACTCCTGGACTCGAATTTGGGCTTTG<br/>GCGCTCTCCATTTCACTCCTGAAGATCCTCACGTATTTACCGAGA<br/>ACTGATTTGTGGGAGCGGGTAAAGGCTGAAGGGCATTTCTGCGTGG<br/>GGATGGCCAAACCGGCTGGCGATGCGGCAGTAGGATCTCGTTCGG<br/>AGAGTTGTTCTGCCCTCCGTTTCTTCTCAGCCACGTCGCCAGCT<br/>CCAAGTGCAGCCTCAGCCCTGCCCTCCGTTTCCCTGTTGTCCCTCA<br/>ACGGGGAAGCTCCACTCATTCGGGGCTGAGCCTGGTGGCCAAAGC<br/>TCCTGGGGAGGCTCTGGCCGCGCGCGGTACTTCTGTCCAGGA<br/>GAGAACAAGCTCGGGGGAAAAGTATCTCCATATTTCTTGGAAA<br/>TTTCAGAGAAATTAATTTGTTCAGCCTGTGACCAGATCTTCCAGAA<br/>CCACCAGGAACAGAGAGAACATTAAGCTTGATTTGGCATCGCTTT<br/>AACTTAAAACAACGCTCTCAAGAAACAGCCTCTCCTGTCTGCTTCAG<br/>ACTTTGAACAGCAAAGCTCCACAGGGGATCTTTCCAGCATCTCAGG<br/>ATCAGATGACACAGACTCCAGCAGTGAAGAGGACTTGTCCCACTG<br/>GATGAGGGGAGGGCTGAATCCGAGAAACCTAACCGGCCCGGGAT<br/>TCTACCCACATCGGGTCTTTTCAAAAACGCCAGGGCCAGTTTCT<br/>TTATGCCATATCGTTGTGCTTAGGCCCTCACCAGGCAAGTAAACGT<br/>CCAGATTTGTGTGCTCACTCCCAACTTTTGTATACTAGGTTTCTC<br/>AGCCAATGTATGCTTATTTTCTTCTTTTGTAGTAAGGCTATATCA<br/>TACCTGACAGCATAATCTTGAAC<b>AGGGT</b>GGCCAGAACTTGAATGGGTCA<br/>CTTCCGACAGGCCGAGACCGGTCGGTGTGGAGTTTGTAGTGGCAG<br/>ACCTGTGCTCGTTCCGAGCCAGCG<b>AGGGT</b>GGACTCGGCCAGAGG<br/>TGGGCTCGAGCCCGCACCTCTCGCCCGCCACCCATGCCTGACC</p>                                                                                                                                                                                                                                                                                                                                                                                                                                                                                                                                                                                                                                                                                                                                                                                                                                                                                                                                                                                                                                                                                                                                                                                                                                                                                                                                                                                                                                                                                                                                                                                                                                                                                                                                                                                                                                                                                                                                                                                                                                                                                                                                                                                                                                                                                                                                                                      |
| ENSMUST0000027401.1 | 1 | 72              | ENSMUSG0000026201.1 | <p>CTTCCGACAGGCCGAGACCGGTCGGTGTGGAGTTTGTAGTGGCAG<br/>ACCTGTGCTCGTTCCGAGCCAGCG<b>AGGGT</b>GGACTCGGCCAGAGG<br/>TGGGCTCGAGCCCGCACCTCTCGCCCGCCACCCATGCCTGACC</p>                                                                                                                                                                                                                                                                                                                                                                                                                                                                                                                                                                                                                                                                                                                                                                                                                                                                                                                                                                                                                                                                                                                                                                                                                                                                                                                                                                                                                                                                                                                                                                                                                                                                                                                                                                                                                                                                                                                                                                                                                                                                                                                                                                                                                                                                                                                                                                                                                                                                                                                                                                                                                                                                                                                                                                                                                                                                                                                                                                                                                                                                                                                                                                                                                                                                                                                                                                                                                                                                                                                                 |

|                     |   |        |                     |                                                                                                                                                                                                                                                                                                                                                                                                                                                                                                                                                                                                                                                                                                                                                                                                                          |
|---------------------|---|--------|---------------------|--------------------------------------------------------------------------------------------------------------------------------------------------------------------------------------------------------------------------------------------------------------------------------------------------------------------------------------------------------------------------------------------------------------------------------------------------------------------------------------------------------------------------------------------------------------------------------------------------------------------------------------------------------------------------------------------------------------------------------------------------------------------------------------------------------------------------|
| ENSMUST0000027499.1 | 1 | 77     | ENSMUSG0000026278.1 | GGTGCAGAGCTGGACCTGGCCGAAGGTGGGCCGGGGTTGAAAGAA<br>GCGGCTGCATGACCCGCCGGGACCCACCGCATCGCCTGGAAGAG<br>CCCACCTCCCTGGAAGGAAGACCATCCCTGAAGAGGATGACTGAG<br>ACGTT                                                                                                                                                                                                                                                                                                                                                                                                                                                                                                                                                                                                                                                                  |
| ENSMUST0000027534.1 | 2 | 44,425 | ENSMUSG0000026309.1 | GGCGGAGCCTGTGCTTCAGCTCGGGTGTGGACGGGGCGGGCGCTGG<br>GGCGGGGCGCGCTCGCGGGTTTGAATGGA <b>AGGGT</b> CTAGACCGCC<br>GGAGACGGCAGCAGCGGGTCCCTGAAACCAGAACTCCACCGCCGCC<br>CCGCGGCCATGAGCGGGAGAGGTGTGGCGCTCTCGCCCGCGCT<br>TCGGCC                                                                                                                                                                                                                                                                                                                                                                                                                                                                                                                                                                                                       |
| ENSMUST0000027629.1 | 1 | 29     | ENSMUSG0000026380.1 | GTCTCCCGGGTGTAGTGACGGCGCCGCCCGCCCGCCCGCC <b>AG</b><br><b>GGT</b> AGCGCGGAGCCTCCCGTCCACTGCACCGCCGCCATGGACGTCT<br>TCGGGGACCTGCCGGAGCCCGAGCGCGCCCGCGGCCATCTGCCGG<br>GAAGGAAGCACAGGACGACCCGTGCTCTTTGAGGACCTGCCCCCG<br>GCCAGCAGTACTGACTCAGGCTCTGGGGACCTTTACTCTTTGATG<br>ATCTTCCGCCTGCTGCCAGTGGCAATTCAGGTTCTCTTGCACATC<br>AGGTTCCAGGTGGTGAAGACTGAAGGAAAGGAGCAAAGAGGAAA<br>GCCCTGAGGAGGAGAAGAATGGCGGTGAAGAGCTTGTGGAAAAGA<br>AAGTTGTAAAGCCTCTTCGGTGTCTTTGGTCTGAAAGGCTATGT<br>GGCAGAGCGGA <b>AGGGT</b> GAGAGGGAGGAGATGCAGGATGCCATGTC<br>ATCCTGAACGATATCACTCAGGAGTGAATCCTCCATCATCTCTCA<br>TTACTCGGGTTTCACTTTGCTGTGTTTGTATGGACATGGAGAAT<br>ACGAGCCTCGAAATTTGCTGCACAGAATTTGCACCAGAACTTAATC<br>AGGAAATTTCTAAAGGAGATATA                                                                                                                |
| ENSMUST0000027686.1 | 2 | 25,32  | ENSMUSG0000026427.1 | TGGGTGCTGCTTAAAGGTGGACGGCGGCC <b>AGGGT</b> TGCCGCTCCAG<br>CTCGGTGCCACGCCCCGGCGGTGCTGCGGAAGCCTCAGCC                                                                                                                                                                                                                                                                                                                                                                                                                                                                                                                                                                                                                                                                                                                       |
| ENSMUST0000027697.1 | 1 | 121    | ENSMUSG0000026437.1 | GCCGAGTCTCAGCATGGCTGCCTCC <b>AGGGT</b> T <b>AGGGT</b> CCGGGAGCC<br>GCCACTCCTTCGTTTGTGTTGACCGCCCTTGGCGTCTGTGCTCTCT<br>TGCTTTCCCTGAGCTACTCCAGCAGAC                                                                                                                                                                                                                                                                                                                                                                                                                                                                                                                                                                                                                                                                         |
| ENSMUST0000027877.1 | 1 | 198    | ENSMUSG0000026585.1 | TTTTGCCTTCTCCTCCTCTTACCACCTTCTGCACCCCTCCCTT<br>CTCCCTTCTCCCGCAGCTCAGGTTACAGCTTCTTTGGGGGAAAC<br>CGCTCACCTTTCAGGGCCAGGAAGAGCC <b>AGGGT</b> CCCGAGTAGGGA<br>CCCCGGCGGGCGGGGCAGGGCACCTAAGCCTGGCAGCGCGGCC<br>GCGGAGGGCGGGAGCCGGCTCGCCACGACCGGGACACGCGCAGAGT<br>CCGCCGCGGGCCAGAGAGGGGCACCGCGCCGGGCAAGCTGAGCA<br>AAGGACCACTTTGGACCCCTGCTGATC                                                                                                                                                                                                                                                                                                                                                                                                                                                                                    |
| ENSMUST0000056368.1 | 1 | 102    | ENSMUSG0000026585.1 | GTAGCGCATGCGCCTTTCGGAGAGTTCGGCCCTGACGGCTCTGGG<br>CGGGTCTGGGCTGCTCCAGTGTTTTGGGGCCAGGAGCAGTGGGAG<br>GAGCCGGCGGGTTCACCGTGGTAACCGCTGCGCCGCGCCGCCGCC<br>ACCGCCACCGCCACCGCGCCCGCCCTTGACGGCTTTGGACTGTG<br>ACCGCTCTGCTTT <b>AGGGT</b> ACTTTGGCCGGGTCTCCGGAAGTAGCC<br>CTCCAGATTTCTCAGACACTCCCATTTCTCCCCACGCCGCTGCCGCC<br>GCCGCCGCCGCC                                                                                                                                                                                                                                                                                                                                                                                                                                                                                             |
| ENSMUST0000052228.1 | 1 | 102    | ENSMUSG0000026585.1 | CGGCGGGTTACCGTGGTAACCGCTGCGCCGCCCGCCGCCACC<br>CCACCGCCACCGCCCGCCCGCTTGCAGGCTTTGGACTGTACCG<br>CTCTGCTTT <b>AGGGT</b> ACTTTGGCCGGGTCTCCGGAAGTAGCCCTCC<br>CAGATTTCTCAGACACTCCCATTTCTCCCCACGCCGCTGCCGCCGCC<br>CCGCCGCC                                                                                                                                                                                                                                                                                                                                                                                                                                                                                                                                                                                                       |
| ENSMUST0000027927.1 | 1 | 330    | ENSMUSG0000026618.1 | CGGCGGGTTACCGTGGTAACCGCTGCGCCGCCCGCCGCCACC<br>CCACCGCCACCGCCCGCCCGCTTGCAGGCTTTGGACTGTACCG<br>CTCTGCTTT <b>AGGGT</b> ACTTTGGCCGGGTCTCCGGAAGTAGCCCTCC<br>CAGATTTCTCAGACACTCCCATTTCTCCCCACGCCGCTGCCGCCGCC<br>CCGCCGCCATGCAAGGCGAGGACGCCAGATACCTCAAAGGAAAGT<br>TAAAGGGGGG                                                                                                                                                                                                                                                                                                                                                                                                                                                                                                                                                    |
| ENSMUST0000062189.1 | 1 | 25     | ENSMUSG0000026618.1 | TCCTCCGAAGTTGGAGTCTCTTACAGATGCCTCATCCCTGTTAGC<br>GTTTTAGTTTGGACCACCAGCCTTGGACAATTCGCCCAACCAGG<br>CAATTTGCTATATGCCAGAGGCAAAGTATGCTGTGGTGAATGTT<br>TGCTCTGGGCACCTCTACATCTGGCTGAAGATAAAAATAGCACCT<br>GTCGCTTCTGCCTTGGAAACAACATTTGATGTTGTTGCAGCATTT<br>CAGGTGTGGATCTGGAAGGTGGCACTTGTAGTCAACCTTTAACTCC<br>CGATAAAGTGTCTCTCTTTTACCTGCTACCCAGTACTATGGCC<br>AAAGGAAC <b>AGGGT</b> TGGTTACACAGCCCCAGCTCACGGTATGGAAG<br>ATTACAGCGTAGCATCTCAGCACAGCCTCCCTATGGACTGTTTAGT<br>GGATGAAGGCGGAATGTTACCCGATGCCGAGGCCCTGAACTTTCAG<br>AACAAGGCTGTACTTAAAGAAGGAACAGATGTGGTTATAAAGATGC<br>TTCAAGCTACCAAGAATGTGTTGAAAGAAGAGAACATTTGTGCACAG<br>CTATCCCTGTGACTGGAGAATAAGACACCCGTGCTGATTCGA<br>CAGTTCTCGCCCGGAGCTCTTCA <b>AGGGT</b> CTCTACCTTTAGGTAC<br>CGGGCGCTGCCGTGGCCGTGTGCGGAGGGCTCCGCCGGCTCGT<br>CCACCATGCCTGGGGCTGTGCCCTCGCGGGCCGGGGCGGGCGG |

|                      |   |     |                      |                                                                                                                                                                                                                                                                                                                                                                                                                                                                                                                                                                                                                                                                                                                                                                                                                                                                                                                                                                                                                                                                                                                       |
|----------------------|---|-----|----------------------|-----------------------------------------------------------------------------------------------------------------------------------------------------------------------------------------------------------------------------------------------------------------------------------------------------------------------------------------------------------------------------------------------------------------------------------------------------------------------------------------------------------------------------------------------------------------------------------------------------------------------------------------------------------------------------------------------------------------------------------------------------------------------------------------------------------------------------------------------------------------------------------------------------------------------------------------------------------------------------------------------------------------------------------------------------------------------------------------------------------------------|
| ENSMUST00000027931.1 | 1 | 81  | ENSMUSG00000026622.1 | GGTCGCCCGCGCT<br>CAGACGAGGGGCTCGGGTTTCGGCGCGGTTGGCCTGCAGCGGGCGA<br>GCCTGGGCTCCGAGCGGCGCGTGGTGTGGTTGCC <b>AGGGT</b> GGCCGC<br>TCGCC                                                                                                                                                                                                                                                                                                                                                                                                                                                                                                                                                                                                                                                                                                                                                                                                                                                                                                                                                                                    |
| ENSMUST00000060745.1 | 1 | 10  | ENSMUSG00000026634.1 | GCGGAGGAAG <b>AGGGT</b> CCGCGGCGGGGACGCCAGGCGGCGCCCGG<br>GGAGAGGTAA                                                                                                                                                                                                                                                                                                                                                                                                                                                                                                                                                                                                                                                                                                                                                                                                                                                                                                                                                                                                                                                   |
| ENSMUST00000027961.1 | 1 | 18  | ENSMUSG00000026651.1 | GCTAGCTGAAGCTGCTGA <b>AGGGT</b> CCTTCGTTGAGCTGCCGTGGTCT<br>CCGCCGCTT                                                                                                                                                                                                                                                                                                                                                                                                                                                                                                                                                                                                                                                                                                                                                                                                                                                                                                                                                                                                                                                  |
| ENSMUST00000027980.1 | 1 | 16  | ENSMUSG00000026669.1 | CAGCTAAGAGGAAGGA <b>AGGGT</b> TGGTTACAGGAAAGGGAGTCGGATT<br>GAGTCTTCAGCACTGCCTAGTGTACAGCTGCTTAGAGCACTGGCTT<br>CACGTGCCCTTCCAAAACCAGCTCAGACTGACCTTCGCCCATTCGTA<br>GGATAAAAACCGTAGCACTTACATAAGCTTTCTCTTACAGGTGTGC<br>TTATCTATTGATCATCCTCAAAAAGTCTTAATTATGGGAGAAGCTA<br>TGGACCTGGGAGCCTGTAAGGCCAAGAAGAAGATGGAGAGCCATG<br>TACACAGACAGTTAACTTGCATGACTGTGAATACTGCCAGTATCAC<br>ATCCAGGCCAGTACAAGAAGCTCAGCGCAAAGAGGACTGATCTGC<br>AGTCCACTTTCCTGGGGACGGATTCCGAAGAAGTTCGCCAAAGG<br>CACCAGCCTGAAGGAGCGGCTGTGCCAAGATGGTTTCTACTATGGT<br>GGTGTTCTTCCGAATCCTTCGCAGCGTCCAGGCGGCGCCATTTG<br>CTCCTAAGAAGAAGTTCAAACCACGCTGACCAATCTGGTTGTCCG<br>GGGCACAACTCGATCATCCAGGAACAAAACAAAAGCTTGGTATT<br>CCCCAGAAGAGCTTGTCTGCTCTGAGGAGTTCAGGGAATTG                                                                                                                                                                                                                                                                                                                                                                                                  |
| ENSMUST00000028059.1 | 1 | 4   | ENSMUSG00000026727.1 | GGAC <b>AGGGT</b> GTGTTCTGCTGCGGGATCCTGTTTTTCGGCTGATCCA<br>GTTTCATCGCTCTCCACCCGAGTTTCCCTTCAGGTCCTTAATCACA<br>CCCACAGGTGTTGCTCGCTGCGAAC                                                                                                                                                                                                                                                                                                                                                                                                                                                                                                                                                                                                                                                                                                                                                                                                                                                                                                                                                                                |
| ENSMUST00000028139.1 | 1 | 113 | ENSMUSG00000026799.1 | GGAAAGCCGGCTGTGACAGCTGCAACATGGCGGACGTGCTGAGCGT<br>TGGTGTGAACCTGGAGGCCCTTTTCGCAGGCTATTAGCGCCATCCAG<br>GCGCTACGCTCTAGCGTGAGT <b>AGGGT</b> CTTCGACTGCCCTTAAGGATG<br>GC                                                                                                                                                                                                                                                                                                                                                                                                                                                                                                                                                                                                                                                                                                                                                                                                                                                                                                                                                   |
| ENSMUST00000052987.1 | 1 | 494 | ENSMUSG00000026814.1 | AGGAAGTCTACAAGACAGTCTCCATGCGCCTGAACATCGTCAGCCC<br>TGACCTGTCTGGTAAAGGCCTTGTCCTGCCCTCTGTACTGGGTATC<br>ACCTTTGGTGCCCTTCCTGATTTGGGGCCCTGCTCACAGCTGCACTCT<br>GGTACATCTATTTCTCACACACGTGGCCCCAGCAGCATGGCGTAGTG<br>CCCAGCCTGGAGCCTCGGGGAGCCCCCAGCCAGCCCTTGCCCTGC<br>AGGAGAGACCGAGCAGCCACAAGCTGGAAACCACCGGCCATGAACT<br>TGTCCAGGAACCAACACCTCCCTGCACCTGTTTCATTCCTCCCA<br>GTGGAGACTTCAGATTGGAATACCTTGGGATCTCTCACCCCACTT<br>TACAGAACTGCCCAATCCAGGGGCTCTGGGATATGGCTGCCCGGGA<br>TTACAGAAAGACACGGCACTGCCGTGCACACCCATGCTGCTTAGAA<br>GCCTAAGCCTCTGCCTTCAAGCTGGATCCTGTGC <b>AGGGT</b> GGGCAGG<br>CAAGAACTCAGACATGCCAGCCTAGCCAGGGCGGCTGCATCTG<br>GCCCCAGAAGCCTCCTCACCTGGACTGGCACAACCTTCGGTTGGGGA<br>AACAGAAGCTGAGGGAGCTTAGATGGGGTGGGGATCCAAGCCCTC<br>CCCAGCCACCCATTGGCCAGGCAGCAGGGGGAGTGGCCAGGCGG<br>CTGGTTGTGGCCCAAGTCTGCATATTCATAATAAATCAGACATG<br>AAACCAGTGCCCTCTGGGTTGTATGGGAGAAGAGGAAGATGGGCA<br>ATT                                                                                                                                                                                                                                 |
| ENSMUST00000054313.1 | 1 | 791 | ENSMUSG00000026842.1 | GCCAGCTCTGCCTCGGAAACGCACCAGTGAGAGCAGGTCTGAGCAG<br>GTGGCCAAAAGCAGCGGATGCCCTCCCGGCTGGTGAAGAAGA<br>ACGAGGAGGCTGCTGAAGAAGGCTTCAAAGACACAGAATCCAGCCC<br>TGGCTCCAGCCCTCCAGCTTGACTCCCAAACCTCCTCCGAGGCAG<br>GTCACTGCCCTCTCCTTCTGGCTCTCTCACAAAGGAAGAGGCCA<br>CCAAGGGCAGTGCCTCAGGCATGGGGACTCCGGCCACTGCAGAGCC<br>AGCACCCCCAGCAACAAAGTGGGCTCAGCAAGGCCTCCTCTGAG<br>GAGATGCGCGTAAGGAGGCACAAGCACAGCTCGGAGTCCCCAGGGA<br>GAGACAAGGGGCGACTGGCTAAGCTCAAGCCTGCCCGCCGCTCC<br>TCTTGCTGCACAGGAAAAGCAGGCAAGCCGCACAGAGCCCCAGC<br>CAAGAGGCCGGGAGGCAGGGGGGCCCAAAAGACAAAATGCACGA<br>GTCTGGCTATGGATGCTGTGAACACTGACCCACCAAGCCGGCCC<br>ACCTGGAGAAGGACTGAGAAAGCCTGTGCCCCATCTGTGCCAAAG<br>CCCCAGTCGACGGCTAAGCCTCCAGGACTCCCACCAGCCGGTCT<br>CCACCCCTCCACAGCACAGCTCCTTCCACCCCTGGCTGGGACCA<br>GCAGCCATCTTCTGCCGCTTCATCCCCCTCATATCAACCCGTGTG<br>TCTCTTAGGAAGACCCGCCAGCCGCAGAGCGCATTGCCAGTGCCA<br>CCATCACC <b>AGGGT</b> TGGTTCTGGACAGTACTGAGGCCCTGTGCCT<br>TGCCATCTCCCGAACTCAGAGCAGATGGCCAGCCACAGTGTGTA<br>CTGGAGGCTGGCAAGAACCTGTACACTTTCTGTGTGAGCTATGTGG<br>ACTCTATCCAGCAGATGAGGAACAAGTTTGCCTTCCGTGAGGCTAT<br>CAACAAGCTGGAGAGCAACCTCCGAGAGCTGCAGATCTGCCCTGCC |

|                      |   |        |                      |                                                                                                                                                                                                                                                                                                                                                                                                                                                                                                                                                                                                                                                                                                                                                                                                                                                                                          |
|----------------------|---|--------|----------------------|------------------------------------------------------------------------------------------------------------------------------------------------------------------------------------------------------------------------------------------------------------------------------------------------------------------------------------------------------------------------------------------------------------------------------------------------------------------------------------------------------------------------------------------------------------------------------------------------------------------------------------------------------------------------------------------------------------------------------------------------------------------------------------------------------------------------------------------------------------------------------------------|
| ENSMUST00000028205.1 | 1 | 10     | ENSMUSG00000026851.1 | CGCAGCGCCA <b>AGGGT</b> CTGGTTCCGCT                                                                                                                                                                                                                                                                                                                                                                                                                                                                                                                                                                                                                                                                                                                                                                                                                                                      |
| ENSMUST00000028258.1 | 1 | 29     | ENSMUSG00000026895.1 | ACGGGGCAGACCGGCCGAGGGCACCTGGT <b>CAGGGT</b> CGCGGCTACCGC<br>CGTC                                                                                                                                                                                                                                                                                                                                                                                                                                                                                                                                                                                                                                                                                                                                                                                                                         |
| ENSMUST00000028389.1 | 2 | 10,105 | ENSMUSG00000027004.1 | GTGGGGACCA <b>AGGGT</b> TCGTCTATGGATCCAGAGCCGGGGTGGAGT<br>GGGAAAGGTGTGCGGCTCCTGTGCGGAGCTGCCTGGGGCTACAGC<br>ATCACAGATAGAC <b>CAGGGT</b> CTCACACTCCAGTCCCCTGAAACTCAA<br>AGCCTTCTCGGAAGGAGAGCCGGAGGGCAGGGACCGCGGGGCGG<br>AGCTCTTGTGCGCCGAGGTGGGAAGGCGCAGCTGCGAGCCAAGGCG<br>CTGACCTCCTCTGAGCTCCTCTGGCCGCTCGCAGGATCTTCCCGAC<br>CCTGCAGGACTTGGCAAACCTCCACCTCCGCTCCCATTAGTCCCTC<br>CACCCACCAAAATCTCCTCCCTCGGAGGTCCCCTATCCATCTCAC<br>TTTGCAGAAATTTATCGCTTCTTCCAACACCTTTTGTGCAACACCCCA<br>GAATCCGAGTCCCTAACTGAATTTGACTTTTGTTTTTATTTCTC<br>TCTGGCTTCCCTTCTGCCCCCTCATCTGATTGATGTGCTAAGGCT<br>GATGTCTCTGCCAGAGCGAGAGGAATAAATAGATGCTGCCTCGCCT<br>AGAGGCTTAGACGCTTGGGAAGAGCAGCCGGCGCAGCGAGGCACCG<br>GGCTCCGCCAAGCTAGTGGACCGGACCTGGGAGCACTTGGATCCAA<br>GAGAATGTGATTGTCCAGGGGTGGGGCAGCTCCCAGGTCTGTT<br>GGGATCACCCCTCGGAACCGAGGGGAGACTTCGGAACGAAAGTG<br>TCTCCGCGTCCGTGCTCGGCTGCGCCCTGCCCATCTGCTGGG<br>ACC |
| ENSMUST00000028463.1 | 1 | 136    | ENSMUSG00000027067.1 | GAAACGTAGATTACGCGGGGCCCGGGTGGTGGGGTCTCTGCGA<br>TCAGGACACTACCCTCTGAGCGGAGTTGAGATCCCACCTGTGCG<br>ACATCTACACAACCTAACAGGAATGGGGCACAGCATCCAGAGAA <b>AG</b><br><b>GGT</b> TCGTTTTCTCTGGTGCAGCCTAGGGCTGTGTGCTCAGGCCACC<br>ACGGGCAGGTGAAC                                                                                                                                                                                                                                                                                                                                                                                                                                                                                                                                                                                                                                                        |
| ENSMUST00000028800.1 | 1 | 66     | ENSMUSG00000027327.1 | GTTCGTGCTGCTACCGCCGCTCCGCGGTGCTTCTGACCGCCT<br>GGCCGCGGGGCTCGCCTGCA <b>AGGGT</b> TCCGTGCTGTCTCTGGAGC<br>ATGGCAGGCTGCTGAGGTGAGTGGCAGTGTCAAGTAGGAGCTGCG<br>TGCTTGCCAGTGGCAGGGAGCGTGTCC                                                                                                                                                                                                                                                                                                                                                                                                                                                                                                                                                                                                                                                                                                      |
| ENSMUST00000028817.1 | 1 | 21     | ENSMUSG00000027342.1 | ATTAGACGGTTGCGGGCGCAG <b>AGGGT</b> GGTAGTTGTGCTGTAGGC<br>CTTCGCTGCCGCTTCTGCATCGTGAATCGGGGGACCTTGGCAGCCA<br>GACCTCGTTCCTCTTAGAGTAGCTCTCATCTAGTCGCCACAACCTCC<br>GCCACC                                                                                                                                                                                                                                                                                                                                                                                                                                                                                                                                                                                                                                                                                                                     |
| ENSMUST00000037875.1 | 1 | 113    | ENSMUSG00000027422.1 | TCCCGCGGAGGGGGCCGTTTCGCCAGCTCCGAGGCAGAAAGTGCCA<br>CGACTCCACACGCGCACGCGCAGCGAGCGAGCGCCGGAGCGGACG<br>GCGGACGGGGCGGACGGCGCC <b>AGGGT</b> CGCAGTGTGTGAGCTGCTC<br>AGGGGCGGCTTCTCGGTGGAGGCTCGGCCGGCTCCCCTTTGGGGT<br>TCCGCGGCGGCGGGCGGCTGCTCTTGCCCTCTCGCTCTCCCTCT<br>CGGCTTCCCGCTGCAGGTGGAAAGCAAGCCAGCCAAG                                                                                                                                                                                                                                                                                                                                                                                                                                                                                                                                                                                      |
| ENSMUST00000029005.1 | 1 | 4      | ENSMUSG00000027502.1 | AGGT <b>AGGGT</b> TTCGCCAGAGACCCCGGAAGCGACGGCTTCTCGTCTT<br>TGCTAAGGCTTCTGGTTTTTGTACGGTTTCTGATTTCCGGCTTTGG<br>G                                                                                                                                                                                                                                                                                                                                                                                                                                                                                                                                                                                                                                                                                                                                                                           |
| ENSMUST00000029028.1 | 1 | 191    | ENSMUSG00000027523.1 | AGTGGAGGCACCTCTCGGAGTCTTAGACTTCAGAGTCTGAGACTTA<br>GCGAGAGGAGCCTCGAGGAGACTCTTCTCTCTTTTACCATCC<br>TTTTCTTTTACTTACAGCCACAAGCTGAGGCGCGGAGCTTTAGAAA<br>GTTTCGAGTGGTTTTGAAGTCCCTTGGCAGTGGGGCCACTCTTGCA<br>GAGCCAG <b>AGGGT</b> GAGTCGGCTTCTCGGTGAGCACCTAAGAGA                                                                                                                                                                                                                                                                                                                                                                                                                                                                                                                                                                                                                                  |
| ENSMUST00000029270.1 | 1 | 42     | ENSMUSG00000027715.1 | CGTCTCTCCCGCTGCGAGCTTCTGCTCCGCGGGTGGCCCGC <b>AGGG</b><br><b>T</b> CCCGGCTGCTCCGGAGCGCGGCGCTGTGCAGCTCTGCCGCC<br>GACAGAACCAGGACCGGAGCCGCG                                                                                                                                                                                                                                                                                                                                                                                                                                                                                                                                                                                                                                                                                                                                                  |
| ENSMUST00000029431.1 | 1 | 109    | ENSMUSG00000027842.1 | CCCCAAGGAGACAAGGACATGAAGTAAACACCACGCTAAATGCTA<br>CAGACCCGCACAGGAACCTCTGGAACATCGGGACAGCCTCCCGGG<br>GACCGACGGGTACTGGG <b>AGGGT</b> CGTTTCTGAGTGAATCCCATTTC<br>TCTGGCTGGAGACACAGATGGCCTCAAATGAGAGAGATGCTATATC<br>ATGGTATCAGAAGAAGATTGGAGCATATGATCAGCAGATATGGGAA<br>AAGTCAATCGAACAGACTCAGATTAAG                                                                                                                                                                                                                                                                                                                                                                                                                                                                                                                                                                                              |
| ENSMUST00000037340.1 | 1 | 450    | ENSMUSG00000027942.1 | CATCCACCATGTTTTCTGACGGACTCTAGCCTGGTTTTTTTTTTTT<br>TTTTTTTTTAAATCGAAAACCATATGGAATGTTCCGGAGAGCTCCA<br>GGGAACCTAGGTTCCCTGGCTTCCGACAGCCTGGGCTAACCGCGG<br>AGCGCGGGGACTGTCTTAGCAGGTGTTCCCGAGAGAGAGGCGA<br>TGGCGTCTAGTAGTAACTGGCTTCTGGAGTGAATGTCGTGCTGGT<br>GATGGCGTACGGGAGCCTGGTATTCGTAAGTGTGTTATTTTTGTG<br>AAGAGACAAATCATGCGCTTTGCAATGAAATCTAGAAGGGACCTC<br>ATGTTCTGTAGGACACAATGCCCCCAAGAGATCCCGTTTCATGCT<br>GAAGCCCGGACCCCTGTTCTTTAATGGGTAAGAATTTCCGCTCT<br>ACTTGCTAGATCTGCGAAATACTAGCACCTCTTTCA <b>AGGGT</b> GTTGG<br>CAAGCCCTCATTTGATACTCTCCTGGATGGATATGAGACAGCCGCG<br>TATGGGACAGGGTCTTTGGCCAGAGTGAATACGATATCAAG                                                                                                                                                                                                                                                                           |

|                      |   |         |                      |                                                                                                                                                                                                                                                                                                                                                                                                                                                                                                                                                                                                                                                                                                                                                                                                                                                                                                                                                                                                                                                                                                                                                                                                                                                                                                                                                                                                                                                                        |
|----------------------|---|---------|----------------------|------------------------------------------------------------------------------------------------------------------------------------------------------------------------------------------------------------------------------------------------------------------------------------------------------------------------------------------------------------------------------------------------------------------------------------------------------------------------------------------------------------------------------------------------------------------------------------------------------------------------------------------------------------------------------------------------------------------------------------------------------------------------------------------------------------------------------------------------------------------------------------------------------------------------------------------------------------------------------------------------------------------------------------------------------------------------------------------------------------------------------------------------------------------------------------------------------------------------------------------------------------------------------------------------------------------------------------------------------------------------------------------------------------------------------------------------------------------------|
| ENSMUST00000029554.1 | 1 | 44      | ENSMUSG00000027944.1 | AGGCCTTGAGTGAGCTGGCCACTGTGGTCAA<br>GGTTGCTTTCGGCAGCGAACGCTGAGCCCTGGCTATATCCGACAG<br><b>GGT</b> AGCGTAAGCTGGTCGTGCTGTTGCCATGGGCTGCAGA<br>GCTTCAAAGTTTCTAGTGCCCTACTGGA                                                                                                                                                                                                                                                                                                                                                                                                                                                                                                                                                                                                                                                                                                                                                                                                                                                                                                                                                                                                                                                                                                                                                                                                                                                                                                   |
| ENSMUST00000029603.1 | 1 | 2       | ENSMUSG00000027978.1 | CG <b>AGGGT</b> GGGGTGGAGGTCGGACTCCGGGCTACAGAGCTCCTGGCG<br>CTCATCGCCTCTGGCGCTCCAGCCTTTGCTTCGGGGGGCTGACCCCT<br>TTGGGTCCCGGTGTGA                                                                                                                                                                                                                                                                                                                                                                                                                                                                                                                                                                                                                                                                                                                                                                                                                                                                                                                                                                                                                                                                                                                                                                                                                                                                                                                                         |
| ENSMUST00000029679.1 | 1 | 2       | ENSMUSG00000028044.1 | AG <b>AGGGT</b> GGGAGCGCGTGTGCTGGGAGTTGTCTGGAGGCTCGCG<br>CGCGGGCTGAGCGCCCTCGGACAGAGCAATC                                                                                                                                                                                                                                                                                                                                                                                                                                                                                                                                                                                                                                                                                                                                                                                                                                                                                                                                                                                                                                                                                                                                                                                                                                                                                                                                                                               |
| ENSMUST00000029683.1 | 1 | 282     | ENSMUSG00000028048.1 | ACTTGTCTGTCTAGTCGGTTCFAAGAGCTATGATATCTGTCTGTGT<br>TTTATTTGGTAGGTCTTCTATCCCTCCAAGGCACAGAACTTCCAC<br>AGTCTTCTCATTTCGCTGGTCTGAGTAGCTCCAGTTTCCAAGATCT<br>TCTGGAGAGGGCATCATGGCTCTTTGAGGGCACAGATGGAGGGAGG<br>GCTGAAGGTTGAAATCGATGGGGGAAAAGAGTGAAGAGAGTCTTCT<br>TTGGAGTGGGCAGCAAACTCCCTAGCAGAGTGAATGAATGCAGGAC<br>GCCTCC <b>AGGGT</b> CTACGGGCACTGTCTAATCACTAATAAAGAAGTGT<br>GCTGGTGTCT                                                                                                                                                                                                                                                                                                                                                                                                                                                                                                                                                                                                                                                                                                                                                                                                                                                                                                                                                                                                                                                                                       |
| ENSMUST00000029698.1 | 1 | 66      | ENSMUSG00000028062.1 | TGGGCCACCGGAAGCGACTGAGGGAGAGCAAGAGGCTGCGACTGTA<br>GGGGTGTGTTGGTGCAGGTC <b>AGGGT</b> TAAGAGACGCAGGC                                                                                                                                                                                                                                                                                                                                                                                                                                                                                                                                                                                                                                                                                                                                                                                                                                                                                                                                                                                                                                                                                                                                                                                                                                                                                                                                                                     |
| ENSMUST00000029700.1 | 1 | 91      | ENSMUSG00000028064.1 | GTGCCTGGAGGGCCGCGCCCGTTCAGCCAGGCTGAGCCTGTCTT<br>GCCTTGCCCTGGACCCCTTCTTTGCTCGGATGGCACCCCTGATTC <b>A</b><br><b>GGGT</b> TTGAACACAGGACTTCTCAGTGTGGCTGGCTCAAGGAACCAT<br>CTGGTGACCATCTCAGGCTGACC                                                                                                                                                                                                                                                                                                                                                                                                                                                                                                                                                                                                                                                                                                                                                                                                                                                                                                                                                                                                                                                                                                                                                                                                                                                                            |
| ENSMUST00000029723.1 | 1 | 739     | ENSMUSG00000028082.1 | AGCCAAGGACCCCTGTATCCATTAGAGCGGTAATCAAGAGATCTT<br>CTCGGACTGTATTACAGAGTGAACCTTCATCGGGACAGGAGCGCTCC<br>AGAGATCACCATCGTGGCAGCAGAGCCACTGAGGCCGGCCTCGTGG<br>TTTCCAGGAGCTCCACCTCCAGGACTGGGATTTCCCTCCACGCTG<br>GAGCAGGCCCTTGGAGACCAATGACTTGGTTCCCGCTGAGCTCCC<br>GCCATCTATGAACAAGTGATAAAAGAAATCAACCAAGTCCAGGTC<br>AATGCCACAATAACAATAACGCTGCTGCCACTCCAAGGAGCACTA<br>TCACCTCTGCGACGCAGACGGACTTTCGGAGGACATAGACAGCGA<br>TCCCTCCCCAACACTACAGGCGCCTCTCAAGCCTCTCCAGCCGTCA<br>CCCGCAGCCTCAGCTGGTAACCTCCCCCAGGTGTGGACCTTTAA<br>TCGTCTTCGATATCTGTGAAGAGCAAACCTGTCTGAAAACCCAG<br>TGCTACAAGATGTCCAGTGCCAAGGCCAAGATCAAAAAGCAACCTC<br>AGACCAGTAGCTAGGGATGCTAACAGTAAAGAGAAAAACAGCCAGA<br>AAAGCCAGTGACCCCAAGAGAACTGGCCACCCCACTGTCTACT<br>GGACAGCACCTGCAATTTAGATAGCCAGGCAATGATGAACATTTATG<br>AACACAGAACAAAGCCAAAATATATTGTTTCCAGGATCAAAGCAT<br>TTG <b>AGGGT</b> CAGACGAACACAGAAATCCCAGGACTGCCCAAGAAACC<br>CGAGATTAATCCCCGCACGATTCCCCGAAGCCTGCTGTTTCTCA<br>GGGAAAACCCCTAGTGGCACCCAGCCAGCTGCTAACAGAGCTTCTG<br>GGGAATGGGACACATGGGCGGAAACAGGCTCAAGGTGACTTCCAG<br>AGAAGGGCTCACGCCATCTCATCGCCACAAGAAGCCGGAATCACCC<br>CCAGTAACCAAAACCTGAAATGCCCCAAGAAACCAACTCCTGGCCTTA<br>GGGCAGCGAGCAGGGCAGCCGGTCCCAGTCCAGAGCGACCCGGAGC<br>CTCCGCGGGACTCGAGTCTTAGCGAACCTCGAAGCATCATCCGCT<br>CCGTCTGCGGCTTCCGGCTTCTCCGGCGCCGCGCAGGGGAGCGAG<br>CTCGTGCATCACCCGCGCGGCGCGCTGGGGCTAAGAGCAGGGAC<br>ACCC <b>AGGGT</b> GACTGACCCGTAGAACTCTTCCAGTCTGTCACAAACAGC<br>CATGACCCACTTCAACAAGGGCCCTTCTACGGGCTCTCCGCCGAA<br>GTTAAGAACAAG |
| ENSMUST00000029773.1 | 1 | 188     | ENSMUSG00000028129.1 | CGCGGGCCGGTCTAGCAGCGCAGGCCGGAGCTCAGGGCCCCGCG<br>CGCCCGGCCCGCCCGCTTCTCCGCCGCGCGCAGCCATGGCG<br>CGCCGCTGAGCCGCCCGCCCGCCCGCCCGCCCGACCCGGCTCG<br>GGCTCCCGCGGTCCGCGCGCTCCGACGCGGAGCCCGCAGGGCA<br>GGAGAGGCCGCGCCGATCTCC <b>AGGGT</b> ACCCTCAGAGGCCAGAAG <b>A</b><br><b>GGT</b> GTCAGAGCCCTTGTAAGTGGAGTTTGACGGTCTGAGCTGCG<br>CATCTTACC                                                                                                                                                                                                                                                                                                                                                                                                                                                                                                                                                                                                                                                                                                                                                                                                                                                                                                                                                                                                                                                                                                                                         |
| ENSMUST00000029812.1 | 2 | 206,229 | ENSMUSG00000028163.1 | CGCGGGCTGCTGGGGAGAGGCAGCGGGTTCGCCCTGGGATGGCT<br>TACGCTCTGGGCG <b>AGGGT</b> TGTGCTGGCTGGGCTCGAGGAGCCA<br>GCTGCCGCTCTCGGGAGCGCCCTCGGAGCGTCTCGGGGGCGCT<br>GGGCGAGCACCCGGAACATCGCCGGGTCTACAGCGCGCCCTCC<br>CTCCCCACCCGTGTCTCCAAGTCCCTACTGCCGAGCTCTCGATG<br>GCACCTATGAGAAGGATATAGGACC                                                                                                                                                                                                                                                                                                                                                                                                                                                                                                                                                                                                                                                                                                                                                                                                                                                                                                                                                                                                                                                                                                                                                                                        |
| ENSMUST00000029812.1 | 2 | 206,229 | ENSMUSG00000028163.1 | CGCGGGCCGGTCTAGCAGCGCAGGCCGGAGCTCAGGGCCCCGCG<br>CGCCCGGCCCGCCCGCTTCTCCGCCGCGCGCAGCCATGGCG<br>CGCCGCTGAGCCGCCCGCCCGCCCGCCCGCCCGACCCGGCTCG<br>GGCTCCCGCGGTCCGCGCGCTCCGACGCGGAGCCCGCAGGGCA<br>GGAGAGGCCGCGCCGATCTCC <b>AGGGT</b> ACCCTCAGAGGCCAGAAG <b>A</b><br><b>GGT</b> GTCAGAGCCCTTGTAAGTGGAGTTTGACGGTCTGAGCTGCG<br>CATCTTACC                                                                                                                                                                                                                                                                                                                                                                                                                                                                                                                                                                                                                                                                                                                                                                                                                                                                                                                                                                                                                                                                                                                                         |
| ENSMUST00000029950.1 | 1 | 60      | ENSMUSG00000028282.1 | CGCGGGCTGCTGGGGAGAGGCAGCGGGTTCGCCCTGGGATGGCT<br>TACGCTCTGGGCG <b>AGGGT</b> TGTGCTGGCTGGGCTCGAGGAGCCA<br>GCTGCCGCTCTCGGGAGCGCCCTCGGAGCGTCTCGGGGGCGCT<br>GGGCGAGCACCCGGAACATCGCCGGGTCTACAGCGCGCCCTCC<br>CTCCCCACCCGTGTCTCCAAGTCCCTACTGCCGAGCTCTCGATG<br>GCACCTATGAGAAGGATATAGGACC                                                                                                                                                                                                                                                                                                                                                                                                                                                                                                                                                                                                                                                                                                                                                                                                                                                                                                                                                                                                                                                                                                                                                                                        |
| ENSMUST00000030069.1 | 1 | 418     | ENSMUSG00000028378.1 | AAGTCTGGGCGCTTTGCGAAGCATTCAGAGCGGTCTCCCGGGAAG<br>GAGTTCTGTGAGCTTGTGGTATAACAGGATGGTGCAGGCCAAGAG<br>CTGGACCTGAAGAAGCACTTCGAAGGCTTCCCTACGGACGGTAAC<br>TTCGAGTTGAAGACGACTGAGCTCCACCCCTTAAATAATGGAGGAG                                                                                                                                                                                                                                                                                                                                                                                                                                                                                                                                                                                                                                                                                                                                                                                                                                                                                                                                                                                                                                                                                                                                                                                                                                                                      |

|                     |   |          |                     |                                                                                                                                                                                                                                                                                                                                                                                                                                                                                                                                                                                                                                                                                                                                                                                                                                                                                                                                                                                                                                                                                                                                                                                                                                                                                                                                                                                                                                                                                |
|---------------------|---|----------|---------------------|--------------------------------------------------------------------------------------------------------------------------------------------------------------------------------------------------------------------------------------------------------------------------------------------------------------------------------------------------------------------------------------------------------------------------------------------------------------------------------------------------------------------------------------------------------------------------------------------------------------------------------------------------------------------------------------------------------------------------------------------------------------------------------------------------------------------------------------------------------------------------------------------------------------------------------------------------------------------------------------------------------------------------------------------------------------------------------------------------------------------------------------------------------------------------------------------------------------------------------------------------------------------------------------------------------------------------------------------------------------------------------------------------------------------------------------------------------------------------------|
| ENSMUST0000030091.1 | 1 | 49       | ENSMUSG0000028394.1 | GTCTTGTGGAAGCCCTGTTCCCTCTCTGTGGATCCTTACATGAGGA<br>GTTGCGAGCCAAAAACTGAAGGAGGGCGACAGGATGATGGGCGAGC<br>AAGTGGCCAGGAGTCGTGGAAGTAAAACTCAGCTTTCCAAAAAG<br>GAACGATTTAGCGGCTTTATTAGGCAGGACATCACATTCCTTTTC<br>TGATGGGAGCCTCACTGCCTACTTTGGCCTGCTTGACATCTGTGGC<br>GTGA <b>AGGGT</b> GGAGAACCCTG                                                                                                                                                                                                                                                                                                                                                                                                                                                                                                                                                                                                                                                                                                                                                                                                                                                                                                                                                                                                                                                                                                                                                                                           |
| ENSMUST0000030121.1 | 2 | 123,1092 | ENSMUSG0000028413.1 | AGCGACGCGGGAAGTCCAGACACCAGAAGTGTCTGGAGACCTGAGC<br>AG <b>AGGGT</b> CGGGCCCCAGCGGAGGCA<br>GGATCCACAAGTTTGTGTATCAGCTTATAGATAATAGAACCAC<br>ACCTAAGGAACATAGACATAAAAGAGCCGACAGGACCACAGCCTCA<br>GGACCTCACCAAGGAGGCGAGGGGCCAGAG <b>AGGGT</b> CGGTTCAGGAA<br>GTCACCTGATGAGCAGTATACTTTCTTTCTTTCTTTCTTTT<br>TTTTTTTTTTTGGTTTGTTTTGTCTTTTGTTTTTCGAGACAGGTTT<br>TTTTTCTGTGTAGCCCTGGCTGTCTGGAACCTCACTCTGTAGAACA<br>GGCTGGCCTCGAATCAGAAATGCACCTGCCTCCCAAGTGGTTT<br>TTTTTTTAAATACTTTCTATGATTGCAACCAATGTCACTCAGCC<br>TGCTTCTCATCGAATGAAATCGGAGACAGTTAACAAACCCATATFACA<br>TGGCATATATTGGTTAACAACTCTCCAAACATAGGAGTAGCT<br>AGAATTAGCATTCCCCATCTTAAGTTCTCATCACATTCAAGGATA<br>AATGGGTCTGAGGCCCTCGGGTCAAGACTTCAAGTGTAAATCTT<br>CCAGCTTCCACTTTTCAGATCAACAAGTTAGGTAAGGACAGGCA<br>GTGACAAAGTTTGTAGGAGCCCTGAGTTCCACAGCTTATCAGCTGT<br>GAGATTTTACAGGCATTCTATTCTTATTCACTCCAAGGCACTGAAA<br>TCTTTGTTTACTACATAGTCTGGGCTGGCTCCAACTCTGGCTCTT<br>CCTGTCTCCGCAACCAGAGTCTGGGATTACAGGTGTTACACGCGC<br>GCCTAGATTCCAGTATTCTGTAAATGGGACTGTGTTCCAGCGCT<br>GTGTACAACGGCTGTCTGTACGACAGGCTTAGGAATTAATGCAGT<br>TTTCTGCCAGTCTCATCCCAACAAGCATGTGTCTCATCTCATGTGGC<br>ATGCACTAGAGGCCATGTTGCACCTAGAACCAAGTTGGGACAGTTC<br>CTGAGGTTTCCCAATCCTGCAAACTTATGTGGGAGTAAGAGTAG<br>GGGAGGCTGCCAG <b>AGGGT</b> TTGTCTACTGCTGTGCTCCTCCGCTCA<br>GCGAGTCCAGCCCCGGCTTAGTCCGTGCGCTGCCTTCTCATAGCC<br>GTTACCCCTCAGGCCGCCACAGCCGCCACCGGGAGAGGCGCGGCC<br>GGCAGGCGAGTCCCCGCGTGC <b>AGGGT</b> GTCGAGGACGGGCTGCT<br>GGGCAAGTGCAGCGGCTGCGCTTGGCCACCGCCAAAGCC |
| ENSMUST0000030164.1 | 1 | 13       | ENSMUSG0000028452.1 | TTTTACC                                                                                                                                                                                                                                                                                                                                                                                                                                                                                                                                                                                                                                                                                                                                                                                                                                                                                                                                                                                                                                                                                                                                                                                                                                                                                                                                                                                                                                                                        |
| ENSMUST0000030252.1 | 1 | 23       | ENSMUSG0000028527.1 | TTTTACC                                                                                                                                                                                                                                                                                                                                                                                                                                                                                                                                                                                                                                                                                                                                                                                                                                                                                                                                                                                                                                                                                                                                                                                                                                                                                                                                                                                                                                                                        |
| ENSMUST0000030339.1 | 1 | 18       | ENSMUSG0000028602.1 | TTTTACC                                                                                                                                                                                                                                                                                                                                                                                                                                                                                                                                                                                                                                                                                                                                                                                                                                                                                                                                                                                                                                                                                                                                                                                                                                                                                                                                                                                                                                                                        |
| ENSMUST0000030372.1 | 1 | 190      | ENSMUSG0000028626.1 | AAGGACCCAGACAAGCTTGCCCGGGAAAGGATGGGGCTGAGGGCC<br>AGGAGGAAGGCTTTGATCTTGGAGGCAAGGAGGAAAGGACTTCGA<br>ATGGACTTCTGCTCTTACACAGAAAGTAGTCCCGTACCCGATGAT<br>GCCCCCGGGACTTCCAGCTGGGGCGTCTGGTCAAACCTCAGAATGC<br>AGACCC <b>AGGGT</b> GGGCACAGAAGATCCGCCCTGACCGGGCGGAGCT<br>GGACAGTTCTCCACAGTGTCTCAGGTGACAGGCTGCAGGTC<br>CCCCCGCGCCGCTTAGCTGCGTTTTTCGGGAGATCCAGTCCGAG<br>GCTCCGAAAGCAGCCCCGCCATCGGTGCTTGAGCCCCCGCTCCAG<br>AACCCGCTGTTCGCC                                                                                                                                                                                                                                                                                                                                                                                                                                                                                                                                                                                                                                                                                                                                                                                                                                                                                                                                                                                                                                                   |
| ENSMUST0000030543.1 | 1 | 123      | ENSMUSG0000028760.1 | GAAGAAAACAAAAGAGCAGACCCGAACCCAGATGAAGTGTAGAA<br>GCAGAGGCAGAGCCTAAAGCCGAAGAAGAGCTTGCAGTTGACAGTG<br>TCCTTGAGCCTGAGCAAGAGAAGATGAGCCA <b>AGGGT</b> TTCCGTCTGA<br>GAGAGACCCCTCTGCCCTGAAGAGAGGGAAAGCTGAGGAAGGAAAC<br>GGAGAAGAGGCTGAGCCTGTGCGAAATGGCGCTGAGAGTGTCTCTG<br>AGGGGAAGGGGAGATGGCAACTCAGGCTCTGCTGACAGCTCTGC<br>TGATGGGCTCACCTTCCCGTTTAAAGCAGAGTCTTGAAGCCTGCA<br>GATACAGAAGGCAAGAAGCAGTATGACCGGGAGTTCCTACTGGACA<br>TCCAGTTTATGCCCGCTGTATCCAAAAACCAGAAGGCCCTGCCTCC<br>CATCAGCGACGTGGTCTTGACAAGATCAACCAGCCAGATTTGTCA<br>ATGCGGACCCCTGGATCCTCGCATTTGCTCGAGGACCTGACTTCA<br>CCCCAGCCTTGTGCACTTTCCAAGGCAACCGCTGGTGGAAAGAGG<br>TGTGCTCTGTGAATGTTGGACCTCGGAGGTCTCAACTGGCCAG<br>AGAAGGGAGCCAGAAAGATAATCACTGTCTCCGTAAGAAAGATG<br>TGCACTTGAGAAAGCGGAGAATGCTTGAAGCCGAGCCAGAAACG<br>GGACAGCCACGCGATGACCCGAAAGCATTAAACTCAGGAAGCTT<br>TTCAGAAAAGTTCGAAGTATCTTGAATAAACTGACACACAGATGT<br>TCAACCAGCTGATGAAGCAAGTGTGGCTCTTACGGTGGACACGGA<br>AGGCGGCTAAAAGGGGTATCGACCTTGTCTTGAAGAGGCTATC<br>GATGAGCCAGCTTCTCTGTGGCTACGCAACATGTGTGGTGGCC<br>TAGTAACG                                                                                                                                                                                                                                                                                                                                                                                                                                               |
| ENSMUST0000030551.1 | 1 | 172      | ENSMUSG0000028766.1 | CGCCAGAGTACGCTCCCGCCACTGCGCTCCTTAGGGCTGCGCGCTCG<br>CGAGCCGGAACAGACCCCTCCACGAGTGCCTGCAGGATCGGAACG<br>TCAATTAACGTCAATTAACATCTGACGCTGCCCGCCCCCTCTT                                                                                                                                                                                                                                                                                                                                                                                                                                                                                                                                                                                                                                                                                                                                                                                                                                                                                                                                                                                                                                                                                                                                                                                                                                                                                                                                |



|                     |   |                  |                      |                                                                                                                                                                                                                                                                                                                                                                                                                                                                                                                                                                                                                                                                                                                                                                                                                                                                                                                                                                                                                                                                                                                              |
|---------------------|---|------------------|----------------------|------------------------------------------------------------------------------------------------------------------------------------------------------------------------------------------------------------------------------------------------------------------------------------------------------------------------------------------------------------------------------------------------------------------------------------------------------------------------------------------------------------------------------------------------------------------------------------------------------------------------------------------------------------------------------------------------------------------------------------------------------------------------------------------------------------------------------------------------------------------------------------------------------------------------------------------------------------------------------------------------------------------------------------------------------------------------------------------------------------------------------|
| ENSMUST0000030586.1 | 1 | 29               | ENSMUSG00000028795.1 | CCCACCATCTGGGCTCCAGCGAGGGACGAATCTC <b>AGGGT</b> ACACC<br>GCTCCAGTTCCTCCCTGAGGAGAGAGAAAGC <b>AGGGT</b> GAGGGAGATTG<br>CAAAGAAGCACTGTTTCACACTCCAGACCCCAAACCTCCAGACCTG<br>AGGTCCAACACACCACCCA                                                                                                                                                                                                                                                                                                                                                                                                                                                                                                                                                                                                                                                                                                                                                                                                                                                                                                                                   |
| ENSMUST0000030729.1 | 1 | 91               | ENSMUSG00000028894.1 | CGGAGGTGTCTGCAGGCCACCGGTGACAGCTCGGGAGCCCCCG<br>AAGCAGCTCTAATACGGAATGGGAGGTTCCACCTGCCCTACCCCA<br><b>GGGT</b> TTGACAGCTCAGCATGGACCAGTCTGTGGCAATCCAGGAGAC<br>CCTGGTTGAGGGGGAATACTGCGTCATCGCAGTCCAAGGTGTGCTG<br>TGTAAGGGAGATAGCCGGCAGAGCCGCTGCTCGGGCTGGTGAGGT<br>ACCGGCTGGAAAATGACGCCAGGAGCATGCTCTCTTCTGTATAC<br>ACACCGGAGGATGGCCATCACAGGAGACGATGTATCTCTGGACCAG<br>ATAGTGCCACTCTCAAAAGATTTTATGCTGGAAGAAGTGTCCCCAG<br>ATGGTGAACCTACATCTTGGCTCTGATGTGACAGTACAATTGAA<br>CACAGCTGAACTCAGCTTGTATTCCAACCTCCCTTTGGTTCCACAC<br>ACCAGAACGTTCTCCAGGAAGTGGCCAGAGCCTGTCCAGGTTTCG<br>ACCCTGAGACGCGGGATCCCGAGTTCGAGTGGCTGTCAAGACACAC<br>ATGCGCGGAGCCCGATGCCGAGTCCGCGAAACCGCGAGTGGAAAT<br>TCCGACCCGGGTACCCGGAGTGGGTTCCGCGCCATTGGAGAACGA<br>GGCATCAGTCTCGGAATGCACGGCGAGGATTGGAGGATGTCTTGCC<br>TAGGGCCCTGGCTACATTTCTGCTTTGGGGCGGAGCCGCTGAGGAG<br>CCGGAATTTCTATTGGCGGAGGAG                                                                                                                                                                                                                                                                         |
| ENSMUST0000054917.1 | 2 | 1482,2018        | ENSMUSG00000028906.1 | GAACTTTATGGAATCGGTACCCGAACCACGGCCAGCGAGTGGGAC<br>AAGCGCTTATCTACACACTCACCTTCCGGACTCTTAACATCAACG<br>GGCAAGTCCCTACTGGAGATGGAAGTGTAAATGGCATTGGAACAGA<br>GGAGGTGGCTACCGTGACAAAAGGGCCATCCACCTACCCTGCCTCT<br>GAATGGGAGTGCSCCAAACAGTCAGTAGTTCTTAGTCAGAGCTGGA<br>TGACCACTCCGCGGCGTCTCCACAGAGCTTTGGTTCTGGCTCCCT<br>CTCCATAAACAGCAAGGAGCGGAAGAGAAGGAGCAGGGGGCAGCT<br>GGCTATCTTGATGCTGAAGAGATGCCAACAGGCCCAAGTGGGGAAAT<br>GCTTAGGAGTGGAGGAACAGGCCAGTGCATTCAGTTTCCAGTAAC<br>TCCAGCTTCCCTGCCAGCTGCAACTCGGTGGGAAAAGGCAGACAGT<br>AGCGAAGAGTGGGTGCAGCAGCAGAGACCCTTGAGACCCAGAGCG<br>GATCCTTTCTTGACTCACCTGTGGGTAACCAGTTCCCCACCCTCAT<br>TCGAAGTTTCCAGCCTCCTCTGGTAAAGACTCAAATGTCACCATC<br>TCAGATACTGCCAATGCTGTGAAAAGTGAATCCCAACCAAAGATG<br>TCCCTATTGTCCACACTGAGACCAAGACCATCACCTATGAAGTGC<br>CCAGACTGAGGACAGCAATGGGGACTTAGACCCCTGGAGTCTTGTCTG<br>ACAGCCAGACCATCACATCCGAGACCACAAGTAGTACAACACGGA<br>CACAGATTACCAAGACTGTAAAAGGTGGGATTTCTGAGACCCGGAT<br>CGAGAAGAGAATTGTGATCAGAGGAGATGCCGATATCGACCATGAT<br>CAGGTCCCTGTACAGCCATCAAGGAAGCCAAGGAGCAGCATCCAG<br>ACATGTCAGTGACCAAGGTGGTCTCCACCAGGAGACAGAGATCTC<br>TGAGGAGTGAAGTCAAGGACTGTCTGCCCCACCCCACTGTGCC |
| ENSMUST0000053819.1 | 2 | 810,864          | ENSMUSG00000028911.1 | GAGGAGAGTAGTCAGAGATGATTGCAAGGTTGTTGGGAGTGAATCA<br>GGTGTGTCAGGGGTTCTGGAAGAGAGAAAATCATGAGGTAGGTTTCT<br>TCTTTGAAGGTGGGAAAGATCAAGTGCAGACTGAGCTGTGGCCAA<br>CCGTTGTCAGACCAGGAATCCACACTAGCTCTAATGAGAGAGCTCT<br>TGGTGTGCGGGAACAGTCCAGTTTGGCCAGCTGAAAAGTCCCAGGC<br>TGGGTAATGTTGAGCCCTGAAGTCCGACCCAGCTCTGCCACTGAG<br>TGAGCACGGGTAAGTCTTCCACCTTCTCTGGGTGGCCTTGATGGCC<br>CTCCCTCTGAGACTAAAGAAAAGGGAGGGCAGAAAAGCCAGA<br>GCAGCCTCCTTCTGTCTCAGAATAGGAAAAGGTCTCAGGAACCTG<br>CTCCTGGAGCAGCAGCTTGCCACTGTGGCTTGTAAACTCCCTCAGT<br>CACTGCGGAAGCCAGCTCACATCCATGGCCATTAAGGTTAAGCAGT<br>TAATGTGCTTTGAGGGCCTGACTGCTGGTGGCCCTGGGATGCTGCAG<br>ACCTGTGGAATCAGGGCCATTGCACTGTTCTCATTCACAAGCTTCT<br>ACAAGTTAGCATCACCTGAGCACGAGAGTTGGCTGTAGAACTGTCT<br>TAGTTCTACAGGTTTCTGTGCACCTGATGCAGCACTCGAGAATTAC<br>TCTCTACTGTCTGTCATATGCCCTTTTCACTCTTAAGACCCAA<br>GTTGGTTGAAGCCTAGGATCTACTGAGTGTCTTGAAGCTGTTTGA<br>TTCCCTGTTCACTGAATACCATTTCTTT <b>AGGGT</b> AGATTAAAGGCT<br>CTGCCCTCAAATAACAATGCTACTGGCTTAGATT <b>AGGGT</b> TCAAG<br>CCACCTGTGGGTTTACTTCAACAGATGAAAATTTTCTCTGAGCATA<br>CAGCAACATCCCTAATCTGACCAGCCATGGAGAGGTTCCGGTCTT<br>ACAAGGAAAATGAGTGAATGTGGGA     |
| ENSMUST0000062981.1 | 1 | 41               | ENSMUSG00000028937.1 | AGAGCTCTTCCCTAACAACTTCCCTTTGGCTGCAGCTTCTGC <b>AGGGT</b><br>GACGACAGACAGAAAGGAC                                                                                                                                                                                                                                                                                                                                                                                                                                                                                                                                                                                                                                                                                                                                                                                                                                                                                                                                                                                                                                               |
| ENSMUST0000059610.1 | 4 | 1,80,245,32<br>1 | ENSMUSG00000028960.1 | <b>GAGGTC</b> CACGTGACCCCTTCAAGATGGCCGCCCTGTGTTTGA<br>TGAATAAATTTGTTGGTGGGGCGAGGGGTAAAGAT <b>AGGGT</b> TGGAGGG<br>GTAGGAGGATTTACGCTTCCAGCGAGGGCTTCGCCAGTCCCGTCCC                                                                                                                                                                                                                                                                                                                                                                                                                                                                                                                                                                                                                                                                                                                                                                                                                                                                                                                                                             |

|                      |   |                     |                      |                                                                                                                                                                                                                                                                                                                                                                                                                                                                                                                                                                                                                                                                                                                                                                                                                                                                                                                                                                                                                                                                                                                                                                                                                                                                                                                                                                                                                                                                                                                                                                                                                                                               |
|----------------------|---|---------------------|----------------------|---------------------------------------------------------------------------------------------------------------------------------------------------------------------------------------------------------------------------------------------------------------------------------------------------------------------------------------------------------------------------------------------------------------------------------------------------------------------------------------------------------------------------------------------------------------------------------------------------------------------------------------------------------------------------------------------------------------------------------------------------------------------------------------------------------------------------------------------------------------------------------------------------------------------------------------------------------------------------------------------------------------------------------------------------------------------------------------------------------------------------------------------------------------------------------------------------------------------------------------------------------------------------------------------------------------------------------------------------------------------------------------------------------------------------------------------------------------------------------------------------------------------------------------------------------------------------------------------------------------------------------------------------------------|
| ENSMUST00000030801.1 | 4 | 119,198,36<br>3,439 | ENSMUSG00000028960.1 | <p>TCCCCGCCCCCACCGGGTTCCTCGCGTGGAGGCGGGGCGAGCCT<br/>GGCCTGCTTTAGAGGGGAGGGGCTTCCCGGTCCGGTGCCTGGGCTC<br/>TGCCCTGGGCTGCTGT<b>AGGGT</b>CGCCGCGCCTCGGGGGCATCCAGTGT<br/>GCAGTGGAGCTGTTCCCGCTGGGCCAGGGGTGGGACCCGGAGCA<br/><b>GGGT</b>CTGCGGGAGAAAAAACGCAGCTGCCGCGTCACCGCCACGAA<br/>GACACGGCGCGCAGCGGGCACGAGCCGAGCTGGAGACCGCGCCGCC<br/>CGCCCTGGGTAACCTGGGAAGCTGAGGGGAGTCACTGGCGCCTGGA<br/>GAGGACCCATAGCGGTGGCCGTGGCCAGAGGGCGCAGCTCTGGGC<br/>GCTTGTCTGCTGGAGGAGCTGCGGCGGTGCGAGCGGCCGAAGCCAA<br/>GGCGATTAGTGCCTCGTGTCTTAGTTTAACTCTGACTATGC<br/>AATTCTGAAACCTCCCCATTGGGGGACCAGACAGCCCGATAGATA<br/>CCTTCCACTCTTCTTTGCTCCCGCCCTGGTCTCAAGAACTGAAGG<br/>ATCTCTTAACGCCCTTACCATTAAGAGGAAAGCG</p> <p>GGAAGAGGGGTGGGGCAGGGGCGGGGACAGGATGCAAGCGAAGA<br/>GGAATCGGCGGGCGCAGCGCCCGCTGCTTATTGGCTGGCGAATCCC<br/>AGAGCGAGAAGCCCGCCTCCCGGGC<b>AGGGT</b>CACGTGACCCCTTT<br/>CAAAGATGGCGCCCTGTTGTTTTGATGAATAATTCTTGGTGGGGC<br/>GAGGGGTAAAGAT<b>AGGGT</b>TGGAGGGTAGGAGGATTTACGCTTCC<br/>AGCGAGGGCTTCGCCAGTCCCGTCCCTCCCTGCCCCCACCGGGG<br/>TTCTCGCGTGGAGGCGGGCGAGCCTGGCCTGCTTTTAGAGGGAG<br/>GGGCTTCCCGTCCGGTGCCTGGGCTCTGCTGGGCTGCTGT<b>AGGGT</b><br/>CGCCGCGCCTCGGGGACATCCAGTGTGCAGTGGAGCTGTTCCCGCC<br/>TGGGCCCAGGGGTGGGACCCGGAGC<b>AGGGT</b>CTGCGGGAGAAAAAAA<br/>CGAGCTGCGCGCTACCGCCACGAAGACACGGCGCGCAGCGGGCA<br/>CGAGCCGAGCTGGAGACCGCGCCCGCCCTGGGTAACCTGGGAA<br/>GCTGAGGGGAGTCACTGGCGCCTGGAGAGGACCCATAGCGGTGGC<br/>CGTGGCCAGAGGCGCGAGCTCTGGCGCTTGTCTGGAGGAGGCT<br/>CGCGCGTGGAGCGGGCGAAGCCAAGGCGATTCACTGCCTCGTGT<br/>TCTTAGTTTAACTCTGACTATGCAATTCTGAAACCTCCCCAT<br/>TGGGGGACCAGACAGCCCGATAGATACCTTCCACTCTTCTTTGCT<br/>CCCGCCCTGGTCTCAAGAACTGAAGGATCTCTTAACGCCCTTTCAC<br/>CATTAAGAGGAAAGCG</p> |
| ENSMUST00000030810.1 | 1 | 55                  | ENSMUSG00000028962.1 | <p>GGAGCGGCGGGGGCGCCCGGGTGGGCACCGGAAATCGTCCG<br/>GAGCGCGCG<b>AGGGT</b>TCCGGAGGATCAGGGGAGACCCGGAGACCC<br/>GGGACACGAAATCTAGAGCTAGCGGTTATGCCCTCCACCTGTGTGC<br/>CCTGAAAGCCGAAGCGACAGCGAGAAGGGCTAAGATTTGGCC</p>                                                                                                                                                                                                                                                                                                                                                                                                                                                                                                                                                                                                                                                                                                                                                                                                                                                                                                                                                                                                                                                                                                                                                                                                                                                                                                                                                                                                                                                    |
| ENSMUST00000030830.1 | 1 | 59                  | ENSMUSG00000028980.1 | <p>AGAGCTTCATCTGGAAGTGTGGTCCCCAGATTGGCCATGAGGGGA<br/>CCAAATGCAGAC<b>AGGGT</b>TGACTGACACCAGGTTGTGTCTTTGCC<br/>TGACTGGCACACAGGCATTTGGAAG</p>                                                                                                                                                                                                                                                                                                                                                                                                                                                                                                                                                                                                                                                                                                                                                                                                                                                                                                                                                                                                                                                                                                                                                                                                                                                                                                                                                                                                                                                                                                                    |
| ENSMUST00000030886.1 | 1 | 103                 | ENSMUSG00000029022.1 | <p>GATCTCGGGACCACAGAGGCGTGCCTTCGTTCCCGCTAGACCGGTAG<br/>AGAAGGGGCAAGCGCCTAGGCCCCGGTGTGCACCTGCCTGAGTGC<br/>GCGTGGAACT<b>AGGGT</b>CAGCACCTCTGCAGCCCAGAGACAGTGACA<br/>TTACTGTGAGAAGCCGCATGCCCAAT</p>                                                                                                                                                                                                                                                                                                                                                                                                                                                                                                                                                                                                                                                                                                                                                                                                                                                                                                                                                                                                                                                                                                                                                                                                                                                                                                                                                                                                                                                              |
| ENSMUST00000030938.1 | 1 | 86                  | ENSMUSG00000029062.1 | <p>CCGGGCGCTGTTCTTCCAGACTCCAGGACCGGCTGCGGGCGCTG<br/>TAGCGGCGCAGGGGTGAGTAGCGGCGCGGGGGTTTCGGAGC<b>AGGGT</b>T<br/>TACGGCGCCCTGAAGAATCGCGGCTGGCGACACGCTGCTGCCGCG<br/>GAGCAGTCTCGCTCCACACGGAGCTGAGGGCGGTGGAGGCGGACGG<br/>CCTGGCGGCCCCCGAGCCGGCCCTTGCCTCAGGTTTGGCTGACTG<br/>AACCTCAGAAGTGGGACCCCGCCCGGAGTCCCGCGCTTGACAGT<br/>GCACCTTGATCTTACCTGTACCCAGGCGCTCCCGCGCTCTGGAGC<br/>TTTCTCATAACAACCTTTTGACACCTAAGGCAGAGTGTGTGAGTGC<br/>GAGGCACTGAAATGACCTGGATGGTCTTTCATCTAGAACAGTACC<br/>GTTACGTGGATGATGATGGTTGCGTTTTACGGAAAACACTGAGGTA<br/>AACTAAGTTACCCAAAACCTTACAGGAATGACAGAAACGACAGTGT<br/>ATTCAGGCAGAATCCTTCCGACCTACCGGACTTACTCTGAAACAC<br/>TAACGATTAGACTTAAGTGTTCGGAAAAGACAGACCGACAGACCGA<br/>CCGTAGCTTTCTGTGTCCCGAGGTTGCTTGAATGTTTTCTTTTT<br/>GCAGTGTTTTAACTCAA</p>                                                                                                                                                                                                                                                                                                                                                                                                                                                                                                                                                                                                                                                                                                                                                                                                                                                                                               |
| ENSMUST00000030987.1 | 1 | 100                 | ENSMUSG00000029104.1 | <p>GGCTGAGCGCCTTGGTTCGGCTTCTGCCTGCCGCGAGAGCCCCAT<br/>TCATTCCTTGTCTGCTAAGTGGCGCCCGGTAGTGCCAGTAGGCTCC<br/>AAGTCTT<b>AGGGT</b>CTGTCCCATCGGGCAGGAAGCCGTC</p>                                                                                                                                                                                                                                                                                                                                                                                                                                                                                                                                                                                                                                                                                                                                                                                                                                                                                                                                                                                                                                                                                                                                                                                                                                                                                                                                                                                                                                                                                                      |
| ENSMUST00000031024.1 | 3 | 322,1563,2<br>040   | ENSMUSG00000029142.1 | <p>GTCGCTGAGGCGCGGCGAGGGCTGCGGCGTGGAGCCGAGGCGG<br/>TGACCCGAGGTCCCGAGGTGGAGCCCGGAGGGGTGGAGGACCTGG<br/>CGCGCGGCTGCCACCCCGCGCGCCCTCCGGTCTGGTGAAG<br/>CGGGCGGAGCCCGTCCCGCTTGCAGGGGTGTCGAAGAAATGTC<br/>TACTGGCGCTGTGGTATTACCCGCTGCCTGGCTCCTGGCTGACA<br/>TCCTGATTAGAGTTAGCATCTCAGGCGACTTTGCTGCAGTCTGTAA<br/>AGTTCAAACAAGAGCTGTGTTGCAGTACAAATATTTACTATATAGA<br/><b>AGGGT</b>GGGGATAGAGCAGATATTACTTAGAACGATGTTAAGATGGC<br/>AGACAACCTGTTGATTATACCAAGACAACAACAACAACAACATTC</p>                                                                                                                                                                                                                                                                                                                                                                                                                                                                                                                                                                                                                                                                                                                                                                                                                                                                                                                                                                                                                                                                                                                                                                                          |

|                      |   |     |                      |                                                                                                                                                                                                                                                                                                                                                                                                                                                                                                                                                                                                                                                                                                                                                                                                           |
|----------------------|---|-----|----------------------|-----------------------------------------------------------------------------------------------------------------------------------------------------------------------------------------------------------------------------------------------------------------------------------------------------------------------------------------------------------------------------------------------------------------------------------------------------------------------------------------------------------------------------------------------------------------------------------------------------------------------------------------------------------------------------------------------------------------------------------------------------------------------------------------------------------|
| ENSMUST00000031032.1 | 1 | 77  | ENSMUSG00000029147.1 | ATAATTGTGTGGGCCAGACTCACACCAGGAAAAAGTTATTTTAGTG<br>TAAAGTGGGGAATACTTTTAAAGTGTTTTGGTTACAACCTAATGTT<br>GATAAGCACCTTCCAATGAAAAAATAACAACCTTATCTTTTCTT<br>TCTTCCAACCTTTACACACACAAGTTGCCAAGAGCAAGTCAAAGTA<br>AGTAAGGTTTTGTTTTATTTGGCCAGTGTGGGTTTGATCTCCC<br>AAGAGTTGATCTGGGGTATTTATTTGGTTAATTTTGGTTGATGT<br>GAGCACCTTGGGGGAAAAGTCCTTTGGTGGTGCACCATTTGACAGT<br>TCGATCCTGGGTTCAGATACATAAGCTGAGAATGCATCTGATATA<br>CCAAAACCACAGATCATGTCGCTTAGCAACCCCTGCTTCTCTTCCC<br>TTTGTGGCTGGTAGGAAGCCGAGGTACCCGTTACTAATCGGGGAAG<br>AGAGCACAGTGGGAAATGTGGCTCTTTGCAAAGCAGTGCAATTTGCA<br>CTGGGTAACCTGAGGATGTAAGTTGAGGACTGTGCTGTCTCCCTTC<br>TGTCACAGGAGTATTCACAGCCTTTGTGTAAGGAACTTTGCTTC<br>GCACCTTGCCTGACTGCGCAGCCGGGCCCGCTCTTGCACGCGC<br>GCCCCAGGGGCCCGGCTCCGGCCGGCA <b>AGGGT</b> CGCGTCCCGC<br>TTACTGTTCCTCAGGTAGCCAGCCATCCGCCGCC |
| ENSMUST00000052121.1 | 1 | 396 | ENSMUSG00000029199.1 | AAGCGACGAGTTGTTGGACGCGTCCGGTCCGGGGGTGCTGTTCCC<br>TCGATCCTTGGACTCCTGAGACCTAAAAGAGGGGGATGGCTCTA<br>CGCTGCTGGGATACAGCTCGCAGCTGGGGTCCCGGTGAGCGCGC<br>GGAACGCCATTTGCTTATCCTAAGTTCAAACCTAGGGAAATTTGTTCC<br>AGATATCCTTTTAAAGCCCGACAGCTGTGGCATATCTTAAT<br>TATTGCAAACCTGTTGACAAACATATTTAGTACCTGTTTAGGAAT<br>AGAAGACATGAAAACGTGGCATGTTAAGTCACCCACTAAGGTTTTC<br>TAACCTATATTTAGCGGTTAACTTTGATCTGCGTCCCCTTTTTC<br>CCCCATTTGTCATGGCTGAGCGTGCAT <b>AGGGT</b> CTCTGTAATCTAG<br>GCTGGCCTGAAACTAAATTTCTAGACCAAAGACGACTCCTCACTCT<br>GCCTCCTCTGAGAGCTGCATACGTTTGGAGCCGCGGTGACTTAC<br>GGTCTTTCACCTTGAGTCTTTTTCAGGTTCTGATCTACGTAGTTT<br>GAGCTCTTAAATCGTTTACATAATTTCTGAATCAATTTCTTTAGC<br>TTTGGTATTATAATGGGTTAAAACATAATTTTTCAGAGTCTACTG<br>AGTGAATGTTGTACTGAACCCTTTGTGTAG                                                        |
| ENSMUST00000031105.1 | 1 | 14  | ENSMUSG00000029203.1 | GGAACGCGACGGCC <b>AGGGT</b> GGCAGTGGCAGCGTTCGTTGCTCGGG<br>TCTGAATCGCTGAGGGAGGAGGCCGGCGGAGGAAGAGGTGGCAG<br>CGGTGGCGGTGGTTCGTAGCGGTGGCGGAGGAGCGGGTACGAATCA<br>GCTGCGGGCAGAGAC                                                                                                                                                                                                                                                                                                                                                                                                                                                                                                                                                                                                                               |
| ENSMUST00000031136.1 | 1 | 6   | ENSMUSG00000029227.1 | CTCTT <b>AGGGT</b> CGCCGCCCTCCACCAGGTTGGCCCCAGATTTGAGT<br>CTCGCGCTCTTCGTTTCGCTTACCGCGCGCTTCCCTCCCATTCTCGC<br>GCCCTGGGACGGCGAGGCTGGAAAAGGGGTTGAGAGAGCTGTTGG<br>CGCCGCCCTTAACTTGTGCGTGGGGCGGCC                                                                                                                                                                                                                                                                                                                                                                                                                                                                                                                                                                                                              |
| ENSMUST00000031137.1 | 1 | 0   | ENSMUSG00000029227.1 | <b>AGGGT</b> CGCCGCCCTCCACCAGGTTGGCCCCAGATTTGAGTCTCGCG<br>CTCTTCGTTTCGCTTACCGCGCGCTTCCCTCCCATTCTCGCGCCCTG<br>GGACGGCGAGGCTGGAAAAGGGGTTGAGAGAGCTGTTGGCCGCC<br>CCTTAACTTGTGCGTGGGGCGGCC                                                                                                                                                                                                                                                                                                                                                                                                                                                                                                                                                                                                                     |
| ENSMUST00000031190.1 | 1 | 414 | ENSMUSG00000029265.1 | GCAAAGCGTCCGGGATCAGCTTCCGGCAAACCTCCTTCCCCGGCC<br>CGTAGAGAGACCACCGTTAGCGCGCTCCTGCTCGCACAGCCTGCT<br>CTCGCCACACGCTTGGCCGCTGCGGCTCCCGCAGTGTTCGGCCCC<br>GTCCACTTGGTTTCCAGGCAGCCGGCGTGCCTCAGTTCGGGCTT<br>CGGCAGACATGTTGTGAGGCGGCGCGGGTGCCTGAAGATGGT<br>TTGGCCGAGGCGGCTGCAACCGCTGCTGGTGGCGGCGTCTCGGGG<br>GCTCCGGCTCTGTAGAGCTGACCCCTGCTCAGTGTCCGCCCGGGACC<br>GCGGCCGGGCGGTTATCTCTGCTTTCGCTGCGCTCCCGTGCCTG<br>TTAGGTTCCGTTAGACGACAGCGCCAGTCCGTTTGGAGCGACACGC<br><b>AGGGT</b> GGTTCTCCAGCCCTGGGAGTGGTGTCCCTAGAACCCTCAGC<br>CCCCTGACCTTTCCTTCAATTTCCCACTAAAATCTCTCACACAGTG<br>GGTGTTCCTTGCCTCCAGCCCTCCTTCTGGTTTCTGCACCTCTCT<br>TCTCTGAGCTTCCCGGACCCCAACATCCCTCTCCAGGGACAGCCTG<br>TTGAGAAATCTTCGTGGAGTGGTGGACCAGAGGCGAGGAGTTTAAA<br>AGTTGGGGCTTGAAGACAGGAAGATACG                                                      |
| ENSMUST00000002832.1 | 1 | 392 | ENSMUSG00000029267.1 | CCGCTAGTCCCGGGAAACAAAATGGCGAAGGGCTGTTGCGAAGT<br>GGTCTGTGTTGAGGCGGTGTGAGCACGCACATTTCTCTTCTTAA<br>CCCTCGTCCCAAGGAACCTCGGTGTGTGTGCGTGTGCGAGGGC<br>TCCCCTGGGGCGGTTGCCAGGGAGTCCCGGACTCGCGGGGGAG<br>CGCCACGGGAACGAGATGCTTCTATTTTCTGTATGAAGCGGTT<br>GGCACCACTTAAGTGACCGAATGAGAGACTTACAGGAGCAGGTAA<br>TTCACCTGGTCCACAAGCGTCTCCTTTACGTCGAAACCAAAGACC<br>TCAGCATCCTTGAACAAGCTGCTTTTACAGGATGGACATAAAGCCA<br>AAAAACCAGCATGTAATTTGAAC <b>AGGGT</b> CAAGATGCTCTAGCTAG<br>ATGGTCAGATGGCTTGTTTATCTTGGAACTATCAAAAAGATAAAC<br>ATATTGAAACAGAGCTGCTTTCATCATATTTGAGGACAGTTCCAAAT<br>CCTGGGTTCTTGGAAAGACATCCAACAGGAGCCACTGGGAGTGG                                                                                                                                                                                               |

GGAA

|                      |   |     |                      |                                                                                                                                                                                                                                                                                                                                                                                                                                                                                                                                                                                                                                                                                                                                                                                                                                                                                                                                                                                                                                                                                                                 |
|----------------------|---|-----|----------------------|-----------------------------------------------------------------------------------------------------------------------------------------------------------------------------------------------------------------------------------------------------------------------------------------------------------------------------------------------------------------------------------------------------------------------------------------------------------------------------------------------------------------------------------------------------------------------------------------------------------------------------------------------------------------------------------------------------------------------------------------------------------------------------------------------------------------------------------------------------------------------------------------------------------------------------------------------------------------------------------------------------------------------------------------------------------------------------------------------------------------|
| ENSMUST00000031328.1 | 1 | 516 | ENSMUSG00000029381.1 | <p>GGGACGTCACTGTGAACGCAGTGGGTAGACCCCACTCAGGACTTCC<br/> GCTGAATTCAGCGGGTGTAGTGGGAGAAGCATCCCGGGGAGCCG<br/> CAGGCTTCGCTGTCCCGACTGAGTTTATCTTGGCCTGAGGGCAGCG<br/> TGCTGAGCGATCTAACCCAGCAGGAAGTCTCTTGGCTCCATCT<br/> GGGTCAAGCACTTTAAACCGAAGCCGACTTGACCATGCCTCTGGCG<br/> CGATGAAGACTCCCGAGAACTTGAGAGGAGCCTAGCGCCACGCCAAA<br/> CCCCAGTAGGACCCACGGAGAGATTCGTTTATCTGGAAGCGCTC<br/> CTAGAGGGAGGGGCTCCCTGGGGCTTCACCTGAAAGGTGGCCTGG<br/> AGCGTGGAGAACCCTTAATCATTTTCCAAGATTGAAGAAGGGGGCAA<br/> AGCCGACTCAGTGAAGCTCCGGACTGCAAGCTGGGGACGAAGTCATA<br/> CACATCAATGAGGTGGCGCTGAGCAGTTCAGGAGAGAGGCTGTCT<br/> CCCTAGTGAA<b>AGGGT</b>CTCAACAAGACCCTGCGGCTGGTGGTGCCGAG<br/> A</p>                                                                                                                                                                                                                                                                                                                                                                                                                                                      |
| ENSMUST00000031341.1 | 1 | 119 | ENSMUSG00000029394.1 | <p>GGTCCGGCCCCGGCCAGCACCGACCGGCTGGGCTCAAAGTTTGGC<br/> GCCGCCCTGCGCCGCGCGCCGATGTATGGGTGATCTACTGCGGC<br/> GGCGCGCGGGCGGGCGGGCGGGCGGC<b>AGGGT</b>GAGGGACGGCCATA<br/> TTTGGCGCGCGGGCCGAGCCGGCGACAACAAAAGTGCAGCCGCT<br/> CCCGCGGGCGCTCGGACGGCTGCGGGGACGTGGGGCCCGCCGGCC<br/> CGGGCTCGGCTCGGCTCGCCGGCGGCTCGTGCCCTGGCCCGG<br/> CTCTGCCCGCGCGCCCGCCCGCCGGGGATGTCGTACAAGCCGA<br/> ACTTGACCGCGCATGCCCCGCCGCCCTCAACGCCGGAAGTGT<br/> CCACTACCTCTACTAGC</p>                                                                                                                                                                                                                                                                                                                                                                                                                                                                                                                                                                                                                                                                   |
| ENSMUST00000031426.1 | 1 | 46  | ENSMUSG00000029469.1 | <p>CCAAGGAGCGGTCTCTAAGAACCAGCAAGCGCCCACTGCCTCCCG<br/> <b>AGGGT</b>GGGGAGGTGGTTTCTGTGAGGAGGATTTGAGTTTAAAGCTAT<br/> AACATTAATC</p>                                                                                                                                                                                                                                                                                                                                                                                                                                                                                                                                                                                                                                                                                                                                                                                                                                                                                                                                                                                |
| ENSMUST00000031528.1 | 1 | 272 | ENSMUSG00000029552.1 | <p>GCGGCGCGGAGTTCCCGCAGCGGAGATCGCGGACGCGGGACTGAG<br/> CCCCCAGCGCCAGTATGGACCTGGAAACAAAATGAAGAAGTG<br/> GAACATATGGACACCAACAAAGGTGATTTATGGGAAATACTTCGAGC<br/> TGTGCCTGGCAGTGCAGATGCTTGTGCTGTTCCTCACTACAATCC<br/> TTGTAGACCCATTCCTGTGAAAGCAGTGGACGTTTGGGGGGCAGG<br/> ATACTATGTATATAACAGGAATCTCTGCTCTGGATCAAG<b>AGGG</b><br/> <b>TC</b>ACTGAATGTTGCCAGCATATCTGGTTCTTGACATGATTATG<br/> GAGAAATGGTGCCACTTCCATTCTAACTCTAAACTAAACAGAGA<br/> GAAGAAGCAGGGGCTTGGAGACTCGGGTCATGGAAATATGGGCTTA<br/> GGTCATGAGCAAGGATTTGGAGCCCCGTCTAAAATGCAAGAGA<br/> ACTGT</p>                                                                                                                                                                                                                                                                                                                                                                                                                                                                                                                                                               |
| ENSMUST00000031544.1 | 1 | 137 | ENSMUSG00000029562.1 | <p>GCGGCGGAGCCGGGTGAGAAGCAGCGCGGGCCCATGCAGGACGCTG<br/> AGAAGCTGGCGGTGCCGAGGCGGCCGAGGAGCGGGCTGAGCCCGC<br/> GAGGAGCAGCCGGCTCCGAGTCGCCGCGCAGCGACGAGCGGGCA<br/> <b>GGGT</b>CTGGGGGTCCGAAGTGGGCGAGCGGAAGACGCCGAAGAAG<br/> ACGCCGAGGCGGACCGGAGCCGAAAGTGAAGGCAAGCCGGCGGC<br/> CCAATCCGAAGAGGAAACGGCGACGAGTCCGGCCGCCCTCGCCACG<br/> CCGAGTCGGCGGAGCGGTCCCGTCGCAAGGAGCCCTCTGCTCCCG<br/> GGAAGGCAGAGGCCGTGGCGAGCAGGCCCGGGGACCCCTCGGC<br/> TGGAGCGGAGGAGGAGGGCGGGTCTGATGGGAGCGCGCTGAGGCG<br/> GAGCCGCGGGCTCTGGAGAACGGAGAGGAGATGAGCCCTCCTTCA<br/> GCGACCCGAGGATTTCTGTAGACAGCTGAGCGAGGAAGAACTACT<br/> TGGTGTGTACTC</p>                                                                                                                                                                                                                                                                                                                                                                                                                                                                                                        |
| ENSMUST00000053600.1 | 1 | 992 | ENSMUSG00000029613.1 | <p>AATGGGTGTTCCAGGAGACGCTCTTTTCCCGAGAGCGGCAGCGCC<br/> AACTCTCCCGCGGTGACTGTGACTGGAGGAGTCTGCATCCATGGA<br/> GCAAACCGAAGCGTGAGGTACAGAATGTGCTAAGGCCATCAAGCC<br/> TATTGATGGGAAGTCAAGTCCATCAAATTTGTTCTGGGCAGGTGGTA<br/> CTCAGTTTAAACACCGCTGTGAAGGAGTTGATAGAAAATAGTGTAG<br/> ATGCTGGTGTACTACTATTTGGATCTAAGGCTTAAAGACTATGGGG<br/> TGGACCTCATGAAAGTTTACAGACAATGGATGTGGGGTAGAAGAAGA<br/> AAACTTTGAAGGTCTAGGCTCTGAAACATCACACATCTAAGATTCA<br/> AGAGTTTGGCGACCTCACGAGGTTGAAACTTTTGGCTTTCGGGGG<br/> GAAGCTCTGAGCTCTCTGTGTGACTAAGGTGATGTCACTATATCT<br/> ACCTCCACGGGCTCGCAAGCGTTGGGACTCGACTGGTGTGACC<br/> ATAATGGGAAAATCACCCAGAAAACCTCCTACCCCGACCTAAAGG<br/> AACCACAGTCAAGTGCAGCACTTATTTTATACACTACCGTGGCT<br/> TACAAAGAGTTTACAGGAAACATTAAGGAGGATGCAAAAATG<br/> GTGCAGGCTTACAGGCGTACTGTATCATCTCAGCAGGCGCTGGT<br/> TAAGTGCACATAATCAGCTCGGACAGGGGAAGCGGCAGCCTGTGGT<br/> GTGACAAGCGGCAGCTCTGGCATGAAGGAAAATATCGGGTCTGTG<br/> TTTGGCCAGAAGCAGGTTGCAAAGCCTCATCTCTTTGTTTCAAGT<br/> CCCCAGTACGCTGTGTGTAAGAGTACGGCTGAGCCTGAGCATAAGGA<br/> CGCCAAAACCTTTTCTAGCGTTTCGGGCTTCATTTTCAAGTGC<br/> CGCACGGCGCGGAGGAGTGCAACAGACAGGAGTTTCTTCTCAT</p> |

|                     |   |                              |                      |                                                                                                                                                                                                                                                                                                                                                                                                                                                                                                                                                                                                                                                                                                                                                                                                                                                                                                                                                                                                                                                                                                                                                                                                                                     |
|---------------------|---|------------------------------|----------------------|-------------------------------------------------------------------------------------------------------------------------------------------------------------------------------------------------------------------------------------------------------------------------------------------------------------------------------------------------------------------------------------------------------------------------------------------------------------------------------------------------------------------------------------------------------------------------------------------------------------------------------------------------------------------------------------------------------------------------------------------------------------------------------------------------------------------------------------------------------------------------------------------------------------------------------------------------------------------------------------------------------------------------------------------------------------------------------------------------------------------------------------------------------------------------------------------------------------------------------------|
| ENSMUST0000031640.1 | 1 | 84                           | ENSMUSG00000029635.1 | <p>CAATCAGAGGCCCTGTGACCCAGCAA<b>AGGGT</b>CTCTAAGCTTGTCAA</p> <p>TTTAATAACAAATATTTATTTGTGATTTTTTTTTCTCTTAGTGTAT</p> <p>AGAACAAATACTGGCAAGTTTATGGAACAGAGTAGCA<b>AGGGT</b>AGG</p> <p>CTGACATGTGATTAGGTGTCGAGCCAGAAGGCCACGGGTGTAGCC</p> <p>GGAGCTTGAGCACTCCTATGAGAGCCAGTCTTAGAAAAGCTCTCAAA</p> <p>GTAATCTTTGTTAGCATTTCTGAGACTAGGAGCCTAGGCAACATAA</p> <p>ACATTTATCAATGTATTTACAGATAAAGATTTGGGAAGATATAAAA</p> <p>AAGATGCCCGAACATTTCAACATTAATGAAAAGATTTCAGAAGAAATA</p> <p>CGTATACCAATTCAGCCTTATCAAGTATATGGAAAAGCATAAAGT</p> <p>TAAACCCGATAGTAAAGCATTCCACTTGCCTCAGAAGTTGCTCACT</p>                                                                                                                                                                                                                                                                                                                                                                                                                                                                                                                                                                                                                                                           |
| ENSMUST0000031664.1 | 1 | 57                           | ENSMUSG00000029657.1 | <p>GCTGCGTGAGAGAGCGGGCGGGAGAGCGGTGGCAGAGACTGAG</p> <p>CGCAGTCTTGC<b>AGGGT</b>AAGCCGGAGGCATCTTCCCAGCTGGTCGGG</p> <p>AGCAGGACGAGCACCGCAGCGGACCCGAGCGGAGGCGGACCGGGCC</p> <p>AGCC</p>                                                                                                                                                                                                                                                                                                                                                                                                                                                                                                                                                                                                                                                                                                                                                                                                                                                                                                                                                                                                                                                   |
| ENSMUST0000006301.1 | 4 | 479,899,12<br>13,1683        | ENSMUSG00000029703.1 | <p>AGCGACCGGACTTCTGTGAGGCGCGGGTTCGGTTGAGCCCTCGGCC</p> <p>ACCCATGGCTCCTCTCACGCGCAACTGCTCCTGCAACGTGGGGGA</p> <p>CCCAAGACGGATAAGCTGGGGAAGATTCAGAGTTTGAATCTGTGCG</p> <p>GGCTGCAGCTGCTCTCAGAGCACTTGGATCCCAATCTCCTGGGGCG</p> <p>CCTGAAGAAGCTGAGGGAACCTTGACCTCTCAACAACCTTGCTGGAG</p> <p>ACGCTGCCTGCTAACCTGGGCTGTCCCATCTGCGCATCTTCGCT</p> <p>GTACCAACAACCAGCTCGGGGATGTCACTGCCTTGACCCAGTTCCC</p> <p>AGAACTTGAGGAGCTCAATCTGGAAGGCAACCCCTTCTTGAGGCTC</p> <p>AGTGACAACCTCAAAGTCTCCTTTCTCCTGCCCCAAGCTTCGTAAGG</p> <p>TGAATGGCAAGGACCGGCTCCACCTGCTCACAGGTGGAGAATCT</p> <p>AGATCGGGAGCTGATGGCA<b>AGGGT</b>AAGGATGATGGCGTGGGGTGG</p> <p>GGTCTTGGTCATAGCAAATGGGTACTGAGTGGGACAGAAGTGGAG</p> <p>TTTTGGAGCTGTGTAACAGAGATTTCTGCCAGACAGCCTCAGGTC</p> <p>TGAGGTGGTGAATCTGTTTTTTTGTTCCTTTCTTTCTGTGTTGG</p> <p>AGACCCTGTCTCCAGGTATGCAGCAAGCACAGCAGGACACCAGCG</p> <p>AAGCTAGACTCACAGTGAAGTGGTTTTTGGCACATGCTCTTTCTTG</p> <p>CCTATATAGCCAGGTGGCTTAGGACTCTTCTGCCTCAGCCCCCA</p> <p>AGTGTGGTATCACACCATGTTCAAGTTGAACCAGACTGATTTCAA</p> <p>GTCTAGTACTAGATATTGAGTAGTTTCTAGAAGTGGTATAGTCA</p> <p>GTCTACTGTGTGAGCCGGAGGAGTT<b>AGGGT</b>GGAGGTGCTGTGTGTA</p> <p>GCCTGGAGACCCAGGCTGGGCGGGGACGGTTCGTGGTCTTCTTACC</p> <p>GCAGGTCACAGCTCACTGGCAGAAGTTCATAGCCACTGTGAGCCCT</p> |
| ENSMUST0000031740.1 | 5 | 35,933,105<br>3,118,134<br>6 | ENSMUSG00000029726.1 | <p>CACTCGGGGAAGGAGGGAGTGGAGTGGTCTTAGGA<b>AGGGT</b>TACAGG</p> <p>GGGCTTCCCCTTGCCTCTTCTCAGTACCCTCGCTTGAGAAGGGGA</p> <p>AATTAACAGGGAGAGGAGATGATCGAGATGGCGCGGAGAGGAG</p> <p>CCCTTTCTGGTGCCGGCCCCGCGCGGCTCAAAGATGAGTCGG</p> <p>GCGGAGGGGCGGCCCGAGGTGAATCGCACCAAGAGGCTGCCTC</p> <p>CGGGGAGCTCCGTGATGGGACAGAACACGGGCCGGGCCCTCGCGCG</p> <p>CACTCGGCCGGGGCGGCAGCCGAGCGGAGGGGGCGGCCACAGGC</p> <p>ACAGGCGCACGGGGAGCCCCACGGGCGAGCCGCGCTCCTGCGGAC</p> <p>GTGGGGAGGAGCGCCGGGAGGGGGCGGGACGACCTGGGTCCCC</p> <p>CAGCCCCCTCCTCGACCTCGCAATGGCTACCAGCCCCACCGACCCCC</p> <p>TGGGGTGGTGGGGCAAAGAAGAAATAGCTGTAACCTGGGGGGA</p> <p>GGGAGCGGTGGAAGCTTCAAACATCCGGCTTCAAGAGGCGCCGGC</p> <p>GAGTGAATTCAGACTGCGACTCTGTGTTACCATCCAATTTCCCTCT</p> <p>GGGGGTAACATATTTGATCCACTGAACCTGAATAGCCTCCTGGAT</p> <p>GAGGAAGTGAGTTCGCGCACTCAATGCGGAGACCCAAAGTCACTCC</p> <p>CACTTCCGGCCAAGGGGCGAGACCCTGTGGAGATCCTCATCCCCAA</p> <p>AGATATTTACTGACCCGCTCAGTCTCAACACTTGCACTGACGAGGCC</p> <p>CATGTAGTGTTCCTCACCCTCAAGATTGGTCGCAAGCGCCATA</p> <p>GACACCGGGACCGCACCAACAGCAGCAGCAGCAGGCGTCTGGAGG</p> <p>GAATGATAGCAACGCGCGTGTGCTGCCACTGACCTCTCACGCC</p> <p>TCACCTCATGGG<b>AGGGT</b>GCTACGAGCAGCAGCAAAAACAGAGGCC</p> <p>AGAACCGTGATGCCCTCAACCTTATGAACCAACACAGCCATCAA</p>                 |
| ENSMUST0000061232.1 | 1 | 33                           | ENSMUSG00000029810.1 | <p>TCACGGCCCCCTGGTAGCCCCCTTTTGAAGCAT<b>AGGGT</b>CTCTCTCT</p> <p>CTCTGGAAGAGTCTCCAAGTCTACTCTCTCAAGCTCCATCTTGGCTC</p> <p>AGGATGCTTCTCTCTCTCTATCTGCTTTCTGTAGGACTCTG</p> <p>GGGAGGGAGGGATGTTGGACAGAGGATGTGACTCTGGAAACAGG</p> <p>GCTGAGGCTGGGAGGTCAGAGTCTGGCTTTACCTTCCATAGTTAT</p> <p>CAGTCCCTCACGCCCTGCGTCTTAAGAGCAGGGCCTTTGAGACCAG</p> <p>CAGAGGTGGGACAGTGTGGGACACGGGGTGTCTTTTTCTTTGT</p> <p>TTCTGAACACTGGGAGGAGGATATCAGAGAGCCACTATCTGGAGC</p> <p>GGTGCCAGAAGTGGTGAGAGGCTTCTGGTGCTTAGGGCTTTAGTT</p> <p>CCTGCTCTGCAGAGGAAGCAGAGGATTTGGGTGGCCAGGGCAGG</p> <p>GATAGCACTGGGGTCTAGAGGGGGCCAGCACCCAGACAACCTGAGA</p> <p>CTTTATTTCTGGAACCTCAAGGGAAGGTGTGAACCTGAGGCCCTCA</p> <p>TTTGTGTTTTCTCTCTGCTCCTGAAAAGTTGTCAGACTCTGTG</p>                                                                                                                                                                                                                                                                                                                                                                                                                                                                                                                 |

|                     |   |       |                     |                                                                                                                                                                                                                                                                                                                                                                                                                                                                                                                                                                                                                                                                                                                                                                                                                                                |
|---------------------|---|-------|---------------------|------------------------------------------------------------------------------------------------------------------------------------------------------------------------------------------------------------------------------------------------------------------------------------------------------------------------------------------------------------------------------------------------------------------------------------------------------------------------------------------------------------------------------------------------------------------------------------------------------------------------------------------------------------------------------------------------------------------------------------------------------------------------------------------------------------------------------------------------|
| ENSMUST0000032141.1 | 1 | 13    | ENSMUSG0000030060.1 | CTTTCGGCTCTGAGGTGCACGGCAGGAAAG<br>CTAGTTCGCGAGGA <b>AGGGT</b> GGACTAGACCCTCGGGCGGTCTGAGCGG<br>CAGCGCTGAAGT                                                                                                                                                                                                                                                                                                                                                                                                                                                                                                                                                                                                                                                                                                                                     |
| ENSMUST0000032398.1 | 1 | 54    | ENSMUSG0000030264.1 | TTTCCGGGCTGGCACCTCGGCTTCCGGCGGCGTCTCGCGGTGCGG<br>AGACCGGA <b>AGGGT</b> CTGTGCTTGCTGCCGAGACTGTTGGTCTTTTA<br>GAAACATCTCCATC                                                                                                                                                                                                                                                                                                                                                                                                                                                                                                                                                                                                                                                                                                                      |
| ENSMUST0000032723.1 | 1 | 20    | ENSMUSG0000030512.1 | GCAGGCTGGTGTGCGAGGTG <b>AGGGT</b> CCGCGGGCTGCGACAGG                                                                                                                                                                                                                                                                                                                                                                                                                                                                                                                                                                                                                                                                                                                                                                                            |
| ENSMUST0000032729.1 | 1 | 105   | ENSMUSG0000030516.1 | CGCCTGAGTTGCCCGCGACGGCTCTGCCCGCCGACGGCACGTCTCT<br>CGGCGGCGCGCGTTCGGGGAAAGTTACGTGCGGGAGCAGGCCTTTG<br>GAGGAGACGCCCC <b>AGGGT</b> TAGGGGACAGCCGGAGGCCCGGGTACT<br>GCGGAGCGGCGAGCCGGCGGAGGCGGCGGAGCCGAGCAGGCGGC<br>CGGGTGTGCCCGCGGAGAAGCCCGGGCGGGGCGGACGCTTCCCGG<br>ACTTTGTGCCACTTGAATCCCCTCCCCGTGGGCCGGCCTTTCCG<br>GCCTCCCCGCCCTGCCCGCTCGTCCCCGGGAGATGTTATGCG<br>GACGGTGGCGTGAGGAGCGGGCGGGCCGGCGGCGGAGTTTCCGG<br>TCCGAGGAGCTTCGCGCGCGCGGAGAGACAAAGATGTCGGCCAG<br>GGCCCGGCCGCTAAGAGCACAGCAATGGAGGAAACAGCTATATGG<br>GAACAGCACACAGTGACGCTTACAGG                                                                                                                                                                                                                                                                                                       |
| ENSMUST0000032826.1 | 1 | 606   | ENSMUSG0000030605.1 | GAGAGCAGAGTGCCTTACACTCTCCTCAGAAAGCTGCTGAGGGG<br>GATTCTACAAAGTACCATGGAGAGGCAGGTGCGATGCCAAAAGCCT<br>CTAATTGGGGCCAAGGCAGGAGAATCACAGGTTCAAGGCTAGCAT<br>GGGCAACTGGGAGTGTCCCTGTCTCAAAGCAGTAAGGACTGGGGAT<br>GTAGTCAATGGTAGAAGCCTCACCTAGCTTGTTCAGTTTAGTCC<br>CCAGTACTACACACGCGCTAAGAAGATGACGAAAAGCCTGCTTTGT<br>GTGGAGTTACCTTCGCTGTTCGCTACTGTCCAAGGCCACTCTGCTC<br>CCAAAGCCACTCCTCCTGGGCGAGCCAGGGCTAGGGATGTGGAAGA<br>AGAGGTATCCTGCTTTTCTCTCCTACCAGAGACCAACTACTACAA<br>CCTGGATGGAGAATACATGTTACACACAGCCGTCCCAATAGTCC<br>GTCCCCACCCCGGCCCCACCCCGATCTTTCCAACAACCTAGCCT<br>CCCGTGAGTTAACTCTGCTGGCTCCTTGTCTCCCGTGTCTCCCGTG<br>ATGCTTCTCTTCCATCTGCTGTGCGGTGTCCCTTGGTGTATCTGC<br>TCTGAGT <b>AGGGT</b> CTGAGGTTCTCTGTCTCTAGGTCCTCATGAG<br>AGGCCACGTTGTTTTTCTCCTCTTGTCCCGTGACATAACCGGGC<br>CGTGGAACCTTGGAATTAGGCTCCCGATGGTCACTGTCTCCCTGCAG<br>GTTGTTCTACACAGCTGGGC |
| ENSMUST0000032840.1 | 1 | 33    | ENSMUSG0000030611.1 | TGGTGTGGCTCGAGCTAAGCCAAGCGCCGG <b>AGGGT</b> CAATTTCA<br>GTC                                                                                                                                                                                                                                                                                                                                                                                                                                                                                                                                                                                                                                                                                                                                                                                    |
| ENSMUST0000032851.1 | 2 | 13,63 | ENSMUSG0000030620.1 | AAGTTAGGAAGGA <b>AGGGT</b> CAGAGGTCGCCGGCCAGATGCGTTCCCT<br>GTGTTGTTATGTAGTGG <b>AGGGT</b> CACGTTCCCTTCCGCAAATTCCTGG<br>AAGGTTCTTGTAGTTCAATTAGGACAGTGCTGCGGAATTCCTGGTG<br>TCCGGCCTGAGGTGCCCGCTGGCCTAGCAGAGGCGCCGAGGGCGCT<br>GCC                                                                                                                                                                                                                                                                                                                                                                                                                                                                                                                                                                                                                 |
| ENSMUST0000057491.1 | 2 | 27,77 | ENSMUSG0000030620.1 | CCGGAGAGGCGTGCAAGTTAGGAAGGA <b>AGGGT</b> CAGAGGTCGCCGGC<br>CCAGATGCGTTCCCTGTGTTGTTATGTAGTGG <b>AGGGT</b> CACGTTCCCTT<br>CCTGCAAATTCGGAAGGTTCTTGTAGTTCAATTAGGACAGTGGCTG<br>CGAATTCCTGGTGTCCGGCCTGAGGTCGCCGCTGGCCTAG                                                                                                                                                                                                                                                                                                                                                                                                                                                                                                                                                                                                                             |
| ENSMUST0000032989.1 | 1 | 437   | ENSMUSG0000030738.1 | CCAGAGATGTGGCAGATGTGCCCTAGACTGCATCAATGAACTGATGG<br>ATACGTTGGTTGCACATTCACAACATCTTTGTTGGAGAGAACATTTT<br>GGAAGAGAGTGAGAACTTACACAACCTTTGATCAGGTCACCTGCGTGT<br>ACGAGGCTGCATCCTAACTTTGGTGGAGCGAATGGATGAAGAATTT<br>ACCAAATAATGCAAAATACTGATCCTCACTCCCAAGAGTATGTGG<br>AGCACCTGAAGGATGAGGCACAAGTGTGTGCCATCATTTAGCGAGT<br>GCAGCGCTACCTGGAGGAGAAAGGTACCCTGAGGAGATCTGCCAG<br>ATCTACTTAAGGCGCATCTGCACACGTAACAAGTTTACTTACA<br>AGGCCATCAGCGGCAGCTTACTCCTCCTGAAGGATCTCAAAGTC<br>TGAGCAAGACCAGGCAGAAAAT <b>AGGGT</b> GAGGACTCAGCTGTGCTA                                                                                                                                                                                                                                                                                                                          |
| ENSMUST0000033068.1 | 1 | 221   | ENSMUSG0000030800.1 | AGAACAGTCCACGCTGGTCACTGCAGAGAGACTAAAGGTGTGTCC<br>CGTCTTCCCCCTGGCCATTTCTGCCGAGAAGCCTGCTTACCTTTC<br>CCAGCCTAGATCCTGGGATTCCTCACTCTGATCCCACACCTAGATC<br>CTGCCCTCAAACCAGCCTTCTGTTCTTCCCTTCTACTACGGGG<br>CTCCTTCCGGGGGCCCTTGTCTTAGGCCATGGCCCT <b>AGGGT</b> GGGC<br>CTGGGACTTGGGCGACTGGAAGCTGTGACCATTTCTGCTCTTCTCG<br>GATGCTCCAGTCGGGAATCCGAGCTGACGGGACTGAAGCCTCCTG<br>TGGTCCGTCATCCAGCCACGCATCACCGTGGTGGCAGTGCAAAAG<br>CCCGTCACTGGCCCTGGCAGGTCAGCATCACCTACGATGGCAACC<br>ATGTTTGTGGCGGGTCCGTCGTGTCAAATAAATGGGTGGTGTCTGC<br>TGCTCACTGCTTCCCCAGA                                                                                                                                                                                                                                                                                                        |
| ENSMUST0000051220.1 | 1 | 603   | ENSMUSG0000030868.1 | GGCCGATCAACCGGAAGTAGCTGGAATCACCGTCTGCCTGAGCTAC<br>TGACAGGATCCTGAGGTTACAGAGGGGGAAAGCCATGGAGTTGGG                                                                                                                                                                                                                                                                                                                                                                                                                                                                                                                                                                                                                                                                                                                                                |

|                      |   |         |                      |                                                                                                                                                                                                                                                                                                                                                                                                                                                                                                                                                                                                                                                                                                                                                                                                                                                                                                                                                                                                                                                                                                                                                                                                                                                                                                     |
|----------------------|---|---------|----------------------|-----------------------------------------------------------------------------------------------------------------------------------------------------------------------------------------------------------------------------------------------------------------------------------------------------------------------------------------------------------------------------------------------------------------------------------------------------------------------------------------------------------------------------------------------------------------------------------------------------------------------------------------------------------------------------------------------------------------------------------------------------------------------------------------------------------------------------------------------------------------------------------------------------------------------------------------------------------------------------------------------------------------------------------------------------------------------------------------------------------------------------------------------------------------------------------------------------------------------------------------------------------------------------------------------------|
| ENSMUST00000033169.1 | 1 | 127     | ENSMUSG00000030878.1 | <p>GAACTGCTGTACAACAAGTCGGAGTACATCGAGACGGTGC</p> <p>GGCGACCCCTGCCGCGCTGGCAGTCACGGGACCCCTCGAGGACTGGA</p> <p>CGGTCCGCCCCCCTCCCGTCCCGGCTGCACTGGTCCCGTTCCTCAGT</p> <p>CCCTTCCCTGGATGACTTAGAGATGCTTCGTGTTTCATCTGATTTGT</p> <p>TATTTAGTCGGTGCATGCATGCATTAGGCTCTCTTCTCCTTCATCT</p> <p>CGTGTGTGTGGGTGTGCTGTGTAGCGGGGGAGAAAGTGTGGATGT</p> <p>GGGAGAGTTTCTATGCATATATATCTATGTGTGCATATACACAC</p> <p>GCCTGAGTTTCCCTGTAAATAATGTCTTCCAGAGGAAATACACAGTA</p> <p>CAGCCTATTCATTCTGTATATAAATTACATTTTCAGACTCCGGGCC</p> <p>CTTTTAAAAATAATATTTTCACAGTCTGCTTACGTGCTAAGACGTT</p> <p>ATTGTTTCTATTCGTCAACTCATAATAACAATATGTAACACTGCC</p> <p>CCGTT<b>AGGGT</b>FACTATCATATATTTTCTGTGTCTGTGATCATG</p> <p>GAAAAGTAATTTTCCCTCACTGAAGGCTATGAAACCGTAATATGGAA</p> <p>GTGGGTCTGAATGCACATCAGTCAATAGACCCTCATAGATACC</p> <p>GATCCTGAATTCATTTCTTGAGCTCTCAGTTCCTGATCTACCCCTG</p> <p>CTCTTTTGTAGATATGGATTCAGTTCCTGAGTGTCTTATCACAGGA</p> <p>GCCGTGCCACAGCCTTCCCCCCCCCCCCAGTGCATTCCTTCTC</p> <p>CAGTTTGTTTTGTGTGTGTGTGGTGTGGAGTCTCACTTATA</p> <p>GTTTAGTCTAACCCAAATTCACAGTACCCCCACCCAGAGCTGGGA</p> <p>CAGTAGGGGTGCAGTATACATTCAGGCCCTCATTATTTTAGACTG</p> <p>TTGGGCCGGGCAGCAGGCGTGGAGGACCGGCTCCCGGCCACCCG</p> <p>GGCGCGCTCGCTAGGGCGCCGGCTTTGGCGCGCGGGATAGCG</p> <p>GCGAGAGCTGCTGCGGGACCTGCGTGTCCCGCCCC<b>AGGGT</b>GGCTCT</p> <p>GGTGAGGGCGGGCAG</p> |
| ENSMUST00000033321.1 | 1 | 182     | ENSMUSG00000031012.1 | <p>CGCGGATCAGCCGCCACCACCTCCCTTCGCGACGATCCCTCCCTCCA</p> <p>TGGTGTGTCGCGGGCCCCCTGTAGCCCGAGCTGCCCGCGCCGC</p> <p>GCCGAGCCGGTCTCGGGCAGAGGAGCGGTTCGCGGCTTCGCGGCC</p> <p>CGCGCGGGCTGACGAGCGGAGAGTGCGGCGCTTCGCGGTCCCC<b>AG</b></p> <p><b>GGT</b>CCGCACGCCCCGGCAGCGCGGTTCGCCAGCCACCGCGCAGGAG</p> <p>CAGCGGGCGGGCGGGCGCGCGGGCCCCGGGCCCTCGCTCCCA</p> <p>CGCCCGGCCCGCCCGCCCGCGCGGGGGCGGCAGCCGGCAGAGGAA</p> <p>AGGCGCTGCAGTCTCCGGCCCTCACGGCCCCAGTGCAGCTTCCTCA</p> <p>GCACCGAGGGCTTCGCGGTCTTGAGTGGAGGACACGAGCCCGGAGC</p> <p>CGGGCACTGAGCTCTTGGGCGCCCCAACCCAGTTTTCAGAACCCT</p> <p>CCACGCTGCGGCCGCTGTCCCTTCGGACC</p>                                                                                                                                                                                                                                                                                                                                                                                                                                                                                                                                                                                                                                                                                                |
| ENSMUST00000057655.1 | 1 | 182     | ENSMUSG00000031012.1 | <p>CGCGGATCAGCCGCCACCACCTCCCTTCGCGACGATCCCTCCCTCCA</p> <p>TGGTGTGTCGCGGGCCCCCTGTAGCCCGAGCTGCCCGCGCCGC</p> <p>CCCGGAGCCGGTCTCGGGCAGAGGAGCGGTTCGCGGCTTCGCGGCC</p> <p>CGCGCGGGCTGACGAGCGGAGAGTGCGGCGCTTCGCGGTCCCC<b>AG</b></p> <p><b>GGT</b>CCGCACGCCCCGGCAGCGCGGTTCGCCAGCCACCGCGCAGGAG</p> <p>CAGCGGGCGGGCGGGCGCGCGGGCCCCGGGCCCTCGCTCCCA</p> <p>CGCCCGGCCCGCCCGCCCGCGCGGGGGCGGCAGCCGGCAGAGGAA</p> <p>AGGCGCTGCAGTCTCCGGCCCTCACGGCCCCAGTGCAGCTTCCTCA</p> <p>GCACCGAGGGCTTCGCGGTCTTGAGTGGAGGACACGAGCCCGGAGC</p> <p>CGGGCACTGAGCTCTTGGGCGCCCCAACCCAGTTTTCAGAACCCT</p> <p>CCACGCTGCGGCCGCTGTCCCTTCGGACC</p>                                                                                                                                                                                                                                                                                                                                                                                                                                                                                                                                                                                                                                                                                               |
| ENSMUST00000033509.1 | 2 | 166,354 | ENSMUSG00000031168.1 | <p>TGCCTACTGGTCCGTAGGTAATAATTAATAATGACAGTTTGAGATGA</p> <p>TCAATATTCAGCTAAATGCTGACGAGGCTGTGTTGCCAACTTGTT</p> <p>TACCGTCATGCCTTCTGTTGGCTTTTAAGAACTGGCACTGTTGAG</p> <p>AGTCTACACCAACTGCTCAGCAGGAGT<b>AGGGT</b>TTGAAGGTGACCG</p> <p>ATGCTGTTAGGACTGGAGAGTTCTGAGCTCTGGTGGGGCTAGGTT</p> <p>TGTTTGTACTGAATGTAATCCACCTGTCTGATTTCTGATTTGGG</p> <p>CTAAGAAATGGTCCGGAACTGATTTGGTTGCCCTAGAAAACCTTAGAA</p> <p>GACCACGCAACTCCGGTCACTAGCAAATGTT<b>AGGGT</b>TTCAAATTT</p> <p>CAGCCTCATCTGTGCGATTTGATAAGAGGGCAGGAAATTTGAAGCT</p> <p>CAGAAATAGCATAGATTTGCTATCGGGAGAAAGCGCCACAGACCTT</p> <p>GGAGGTCTCCACCTACTCCTGACTTGGTCTCAGCCAACAGGGAAG</p> <p>ATGACACCATAGGCGAGGACAGGGCTTCGACATTCGGAGGACTCC</p> <p>TATTTGGCAGAAGCCACCTTCTCCACTTCACTATTGGTCCGCTCCAT</p> <p>CGGGCGGGGAAGCGTAGAGCTGAGCGGAACCTGGGCTATTAGGGA</p> <p>GCCTGCAGGTCTTCTTGGAAAGTCGCAAGCCTGTGTTAGGAAGTCG</p> <p>CCCTGCGATCGCGCCGCTGGGGTTTTTCTGTCCCTTTGTCTCGT</p> <p>TTATGTACGAAGCTGCCAGCGGGCCATAGAAAAC</p>                                                                                                                                                                                                                                                                                                                                                     |
| ENSMUST00000033582.1 | 1 | 17      | ENSMUSG00000031231.1 | <p>TTTACAGGACGCTTTGCA<b>AGGGT</b>AGCTGGGGTGAATTTGCACCAAGG</p> <p>CAGCAGCATAGTCGCGCAGTTCCATCTTCGTCTCCGCG</p>                                                                                                                                                                                                                                                                                                                                                                                                                                                                                                                                                                                                                                                                                                                                                                                                                                                                                                                                                                                                                                                                                                                                                                                         |
| ENSMUST00000033604.1 | 1 | 52      | ENSMUSG00000031252.1 | <p>CGGAAACTCTCGCGCTGGCAAGCTCGAGCCGATCGCCCGGTGCAT</p> <p>AGGCGC<b>AGGGT</b>CTCCGGTAGTC</p>                                                                                                                                                                                                                                                                                                                                                                                                                                                                                                                                                                                                                                                                                                                                                                                                                                                                                                                                                                                                                                                                                                                                                                                                           |
| ENSMUST00000033673.1 | 1 | 137     | ENSMUSG00000031311.1 | <p>CGGTCCGCGCTCTTTTCTCGGGACGGTGGAGGCCGTGCAGCGTCC</p> <p>CCCATACTCCGAGCAAAGAACTGTGGCCAGAGGAGTCCAGGTTAG</p> <p>TGAGGACTGCGAGGACACTTTGCTGTGTTCAAATCCAAGTCAA</p>                                                                                                                                                                                                                                                                                                                                                                                                                                                                                                                                                                                                                                                                                                                                                                                                                                                                                                                                                                                                                                                                                                                                        |

| ENSMUST00000052229.1 | 1 | 102  | ENSMUSG00000031311.1 | GGGTACAAAA<br>GTGCAGCGTCGCCATACTCCGAGCAAAGAACTGTGGCCAGAGGCA<br>GTCGAGGTTAGTGAGGACTGCGAGGCAGACACTTGTCTGTGTTCAA<br>ATCCAAGTCAAGGGTACAAAA                                                                                                                                                                                                                                                                                                                                                                                                                                                                                                                                                                                                                                                                                                                                                                                                                                                                                                                                                                                                                                                                                                                                              |
|----------------------|---|------|----------------------|-------------------------------------------------------------------------------------------------------------------------------------------------------------------------------------------------------------------------------------------------------------------------------------------------------------------------------------------------------------------------------------------------------------------------------------------------------------------------------------------------------------------------------------------------------------------------------------------------------------------------------------------------------------------------------------------------------------------------------------------------------------------------------------------------------------------------------------------------------------------------------------------------------------------------------------------------------------------------------------------------------------------------------------------------------------------------------------------------------------------------------------------------------------------------------------------------------------------------------------------------------------------------------------|
| ENSMUST00000033715.1 | 1 | 92   | ENSMUSG00000031349.1 | GAGCGTCAATTGGTTGCGCCAGAGCCAAGCTAGACCAATCAACATT<br>ATGAAGGAAGCTCTGCTGATTGTGGGCTCATATCTATCAGTAGAAA<br>AGGGTGGCGGGTGTTCAGCCAGACTTCTCTGGTTGCCGGTGTCTG<br>CAAGCTGAGGTCGATCATTGAGTGTCTAAACCGGGAAGAAGAGTT<br>GATTGCAAACGAAACCATACTTTGAGCCATA                                                                                                                                                                                                                                                                                                                                                                                                                                                                                                                                                                                                                                                                                                                                                                                                                                                                                                                                                                                                                                               |
| ENSMUST00000033797.1 | 1 | 88   | ENSMUSG00000031422.1 | ATTCCTCACTTCATCTTTCAGACCATCCTAGGAAATACAGGAATC<br>CTTGGAAAGGAAAGAAGGAACATTGTTGGTTGGAATAAAAA <b>CAGGG</b><br><b>TTGA</b>                                                                                                                                                                                                                                                                                                                                                                                                                                                                                                                                                                                                                                                                                                                                                                                                                                                                                                                                                                                                                                                                                                                                                              |
| ENSMUST00000033824.1 | 1 | 79   | ENSMUSG00000031447.1 | TCCACGGGCTCTCGCGAGACCCTCGGCTCACGTGACCGCGGGGCGC<br>GGCACTGCTCACGTGACAGGCGCTGCCGGCCG <b>CAGGGT</b> CCTCTCCG<br>TGCCGGCGCCGAGCTGCGGGGCCCTCGAGTCGGTGGACGCGCCC<br>TCCCGCGGGCTCGCCGCCCGCAACCGCGTCTCCGGCTCGG<br>CTGCTCGCGCC                                                                                                                                                                                                                                                                                                                                                                                                                                                                                                                                                                                                                                                                                                                                                                                                                                                                                                                                                                                                                                                                |
| ENSMUST00000033899.1 | 1 | 89   | ENSMUSG00000031503.1 | AGCAGAGCCAGGCCGGCTGGCCCGGGTGTGCCACGGGCCAACGC<br>TTCTTCAGGGGCCATGCGCGGGGCGAGCAGCTCCTGACCT <b>CAGG</b><br><b>GT</b> TAGGAAGGGATCGAGCCGAGCTAGAGCTCAAAGACTGGGATC                                                                                                                                                                                                                                                                                                                                                                                                                                                                                                                                                                                                                                                                                                                                                                                                                                                                                                                                                                                                                                                                                                                        |
| ENSMUST00000034166.1 | 1 | 26   | ENSMUSG00000031730.1 | CTCCTCCTCACGGTTGCACCGAAGGA <b>AGGGT</b> GCAGCTCAGAGC<br>AGCGTCCCTTAGGAGGCGGACAGCGACAAGACAGAAAGTAGGCAC<br>GTCCCGCCACGGAGCCTGACTCCGGGCGAGCGCACGCGTTCGGCT<br>GTCCAATCAACGCTTAGGGGCGGGCCGGTGGTGGGGCTTGGGAGA<br>TAGGTGGAGCCGAGCCACATTCTCCAATGGGATGCAGGCAGAGGC<br>GGGCTAATGGCAGAAGGAGCATGGCGTGGAGACAGCTGAGA                                                                                                                                                                                                                                                                                                                                                                                                                                                                                                                                                                                                                                                                                                                                                                                                                                                                                                                                                                               |
| ENSMUST00000034226.1 | 1 | 28   | ENSMUSG00000031774.1 | TGTGGCTGTAAGGAACAGGAAGCCCG <b>AGGGT</b> CAAAAGGAATACA<br>ATAGCGAAGTGTGTTTCTTCTTAAAGCCGTCGTTCTTTCTTGG<br>TTTCTTTCTAGTTTTTAAAGAGCGAGAGTGGCCTTGGCGGGCAGC<br>GTTTACGGTAGGCGCCGGAGGTGAGGGCGGCTCGCTCCCGCGC<br>TCTCGTAGATCTGCCACCTCCCTCCTCATAGACGGGACTTGACTG<br>CTAAAGCGCTTGTAGTACCTGAGAGTCTCCATTAGAATCTGCTTTG<br>GAAGCAAGAACAGACTGTACCATT                                                                                                                                                                                                                                                                                                                                                                                                                                                                                                                                                                                                                                                                                                                                                                                                                                                                                                                                                 |
| ENSMUST00000034277.1 | 1 | 93   | ENSMUSG00000031819.1 | GGTAGCAGCTGCTTTCGGCGAGAGCTTTCGGCCGACCGGCTGAG<br>GCGGAGGCCCGGGCCGAGGTGCGAGAGCGTCACGGCGTGCAGCG<br><b>AGGGT</b> CGTGGCGGAGGACCGCGTGCCTGGGTGCGG                                                                                                                                                                                                                                                                                                                                                                                                                                                                                                                                                                                                                                                                                                                                                                                                                                                                                                                                                                                                                                                                                                                                         |
| ENSMUST00000034329.1 | 1 | 129  | ENSMUSG00000031865.1 | TGGATGAAGCAAAAGGCCAAAAATGATGGCACTGTCCAGGGAGGAA<br>GTATTTACATGTGATGAAGGCCACGGCATCTTGTACGCCAGTCC<br>CAGATCCAAGTATTTGAAGATGGAGCAGATACTACTTCCCAGAGA<br>CTCCTGATTTCTGCTTCAAAGTCTCTCAAGAGAGAGGGAGCCGA<br>TGCAGCTGCAAAAGACCAGCAAACTGCGGGGACTGAAGCCTAAGAAG<br>GCACCGACAGCCCGAAAGACCACAACCTGACGGCCCAAGCCTATC<br>GCCCAGCCAGCACTGGGGTGGCTGGGCCAGTAGCTCCCTTGGCCC<br>CTCTGGCTCAGCGTACCGGGGAACTAAGCAGCAGTAGGCCAGC<br>ACCCAGCTCAGACTCCGCTGGCAGCACCCATCATCCCCACACCGG<br>CCCTCACCTCTCTGGAGCAGCACCCCACTTCCATCTCCCTTAA<br>GGAAGAGGAAGGGCTGAGGGCTCAGGTACGGGACTGGAGGAGAAG<br>CTGGAGACCTGCGCTAAACGCTCAGAAGACAAGCAAGTGA<br>AAGAGCTGGAGAAGCACAAGATCCAGCTGGAGCAGGTGCAGGAATG<br>GAAGAGCAAAATGCAGGAGCAGCGCAGACTGCAGCGCCGCTC<br>AAGGAGGCTCGGAAGGAAGCCAAGGAGGCGCTAGAGGCAAGGAAC<br>GCTACATGGAGGAGATGGCCGACACAGCCGACGCTATCGAGATGGC<br>CACTCTGGACAAGGAGATGGCTGAAGAGCGCGCTGAGTCTCTGCAG<br>CAAGAGGTGAGGCACTGAAGGAACGGGTAGACGAGCTACCACAG<br>ACCTGGAGATTTCTAAGGCTGAAATCGAAGAGAAAGGCTCTGATGG<br>GGCCGATCAAGCTACCAGCTCAAGCAGCTGGAGGAGCAGAATGCC<br>CGCTGAAGGATGCCCTGGTGGAGGATGCAGACCTCTCTTCTCAG<br>AGAAGCAGGACAGCTGAAGCTGCAGAACTCATGGAAAAAGAAAA<br>AGGCCATACTAAGCACAGGTGTACAGGAACCAATTTACCATGGAGC<br>ACAGGAGCTTGGAGCCCCACCCACCTACCATCTTCCCCAAA<br>GCCAACAGCACACTGTAAAGAAGATGCCGGCTCACCATCTCA <b>AG</b><br><b>GGT</b> CTCCA |
| ENSMUST00000051662.1 | 1 | 136  | ENSMUSG00000031904.1 | GGGCTCCGGGCAAGGAAGGACCTGGGGACCCGGACCTCGGGAAAA<br>AAAGCAAGTGAGCCCCGAGAGCTTACGAGAAGAGCCGCGCTTGG<br>AGGGGAGGGGAGCTGCAGCGGGTGCCTGGGGCTCCCGCCCTG<br>GCCTGGGTCAGGACCCGGTCTCCGAGGAGCCGGATCTCGAGAGTA<br>GCTTTTGTATTTCCCTCGGAGCACTGAGAGTGGTGTGGTTCTGGT<br>GGACTTGCAGAGGACCAAGACCTTGGGAAGATCGCGTTGCTCTTC<br>AGTCGCCACCAGAGCTAAGTTCCCGAGGAGACTTCCGAAATGG                                                                                                                                                                                                                                                                                                                                                                                                                                                                                                                                                                                                                                                                                                                                                                                                                                                                                                                                       |
| ENSMUST00000034441.1 | 1 | 1744 | ENSMUSG00000031960.1 | GGGCTCCGGGCAAGGAAGGACCTGGGGACCCGGACCTCGGGAAAA<br>AAAGCAAGTGAGCCCCGAGAGCTTACGAGAAGAGCCGCGCTTGG<br>AGGGGAGGGGAGCTGCAGCGGGTGCCTGGGGCTCCCGCCCTG<br>GCCTGGGTCAGGACCCGGTCTCCGAGGAGCCGGATCTCGAGAGTA<br>GCTTTTGTATTTCCCTCGGAGCACTGAGAGTGGTGTGGTTCTGGT<br>GGACTTGCAGAGGACCAAGACCTTGGGAAGATCGCGTTGCTCTTC<br>AGTCGCCACCAGAGCTAAGTTCCCGAGGAGACTTCCGAAATGG                                                                                                                                                                                                                                                                                                                                                                                                                                                                                                                                                                                                                                                                                                                                                                                                                                                                                                                                       |



|                      |   |         |                      |                                                                                                                                                                                                                                                                                                                                                                                                                                                                                                                                                                                                                                                                                                                                                                                                                                                                                                                                                                                                                                                                                                                                                                                                                        |
|----------------------|---|---------|----------------------|------------------------------------------------------------------------------------------------------------------------------------------------------------------------------------------------------------------------------------------------------------------------------------------------------------------------------------------------------------------------------------------------------------------------------------------------------------------------------------------------------------------------------------------------------------------------------------------------------------------------------------------------------------------------------------------------------------------------------------------------------------------------------------------------------------------------------------------------------------------------------------------------------------------------------------------------------------------------------------------------------------------------------------------------------------------------------------------------------------------------------------------------------------------------------------------------------------------------|
| ENSMUST0000001520.1  | 2 | 125,213 | ENSMUSG00000031967.1 | ATGCCACTTTAACAGCACGAGAGATCCGAGAGCGGTTTATAAAATTT<br>CTTCAGACGAAAATGAGCACACCTATGTCCACTCTTCGCCACCACATC<br>CCTCTGGATGACCCCACTCTGCTCTTCGCCAACGCTGGCATGAACC<br>AGTTCAAACCCATCTTCCATAACACAATCGACCCATCTCACCCATAT<br>GGCGAAGCTGAGCAGAGCTGCCAATACCCAGAAAATGCATCCGAGCT<br>GGGGCAAGCACAAACGACCTGGATGACGTGGGCAAGGATGTCTACC<br>ACCACACTTTCTTTGAGATGCTGGGCTCCTGGTCTTTTGGGGACTA<br>TTTCAAGGAATTGGCATGTAAGATGGCCCTGGAACCTCTTACCAG<br>GAGTTTGGTATTCCAGTTGAAAGACTCTATGTCACTTACTTTGGTG<br>GTGATGAGGCGGCCGCCCTAGAGCCAGATCTGGAGTGCAGACAGAT<br>TTGGCAAAAATTTAGGACTGGATGAAGCCAGAATCTCCCTGGCAAC<br>ATGAAGGACAACCTTCTGGGAGATGGGTGACACAGGCCCTGTGGTC<br>CCTGCAGCGAGATCCACTATGACCCGATTTGGTGGCAGGGACGCCGC<br>ACACCTTGTCAACCAGGATGACCCCAATGTGCTGGAGATCTGGAAC<br>CTCGTGTTCATCCAGTATAACAGGGAGTCGGATGGTGTCTGAAAC<br>GCTGGTGGGGTGCACGGGCAGCTGAGCCCTGGCTGGCCCTTTCTCC<br>AAGCTGTGGCGATGTGGCGGATGCGCAGGGAGCGCGGTACCGGTCT<br>GGAGCAGCGTGGGGCTGTGGCATTGCTCTGC <b>AGGGT</b> CATCTGGG<br>GAGATGCTCGCAGAGCTGGCTCTGCAGGGAAAAGTACTTCAATTT<br>TCCCCGAGGCTGTATTTAAAACCTCCCAG <b>AGGGT</b> TTGAGAAGTTT<br>TTAAGAATAAGAAGAACAAGAAAAAGTGAAGCCAGGAAATTCAGT<br>ACCTCAAAAAAAGAACCAAAAAATGCTGGCCCTGGAGGAGATGGA<br>GGCAACAGAGGAGGAAAGGAGATGATTTTCCCTGGTGGAAACGGA<br>TGCAAAAAG |
| ENSMUST00000034552.1 | 1 | 85      | ENSMUSG00000032051.1 | GTGTAGCCCTCTCGCAGCCGGACACGCGGGACCTACCCGACCTCA<br>GCACTGCGCAGGACTCCGCGGGACCCGGAACCTTCCGAC <b>AGGGT</b> T                                                                                                                                                                                                                                                                                                                                                                                                                                                                                                                                                                                                                                                                                                                                                                                                                                                                                                                                                                                                                                                                                                                |
| ENSMUST00000056684.1 | 1 | 219     | ENSMUSG00000032117.1 | CCGGCTTTATCTGCACTGAAGAGTTGCGGAGTTGCCCTGGCATTTCG<br>AAATGAAATTTTGC CGGAGTAGTTGGAGTGATCAGCGCCATACACC<br>TTGCGATTTTCAAGCCCTCTGGCTTTGTTTTCAGACTGGACTCAGGC<br>TGGCCTTGAACCTCCAGTGTAGCTGAGGATGACCTTTCCGCTCATGG<br>ACTTCTGTTTCCACTTCCTAAGTGTGGGATTTCC <b>AGGGT</b> GACAGA<br>GTGCCACTGTCCACTGAAATTCATCAGCTGCACATAAGCAAAGCTT<br>GCCTCAGTGAAGGAGTATTCATGCAGACTTCTGTGTTACAGG                                                                                                                                                                                                                                                                                                                                                                                                                                                                                                                                                                                                                                                                                                                                                                                                                                                     |
| ENSMUST00000054708.1 | 2 | 35,185  | ENSMUSG00000032123.1 | GTTCCTTCCTAAGAGCTTCTTGTGGTGCAGGAGG <b>AGGGT</b> CAGGTC<br>CTAGCTCCCTAGCTGGGTTTGTTCCCGCTGGCGCCGGAATCCTCT<br>GCGGGTTGGGAGCCGCAC TGCCGCTGCCGAGGCCACGGGATTGTT<br>CCTGGCTTACCAGTTAGCTGAGTAGGCGCGGGCGGCCGCCACCG<br><b>GAGGGT</b> CACC                                                                                                                                                                                                                                                                                                                                                                                                                                                                                                                                                                                                                                                                                                                                                                                                                                                                                                                                                                                        |
| ENSMUST00000034639.1 | 2 | 7,157   | ENSMUSG00000032123.1 | AGGAGGG <b>AGGGT</b> CAGGTCCTAGCGTCTAGCTGGGTTTGTTCCCG<br>CTGGCGCCGGAATCTCTGCGGGTTGGGAGCCGCAC TGCCGGTGC<br>CGAGCCACGGGATGTTTCTTGGCTTACCAGTTAGCTGAGTAGGCG<br>GCGGGCGCGGCCACCG <b>AGGGT</b> CACCATGTGGGCTTCCCGGAG<br>TTGCCCTTGCCGCTGCCGCTGCTGGTGAATTTGATCGGCTCGCTGT<br>TGGGATTTCGTGGCTACAGTCACCCCTCATCCCTGCCCTCCGTA<br>G                                                                                                                                                                                                                                                                                                                                                                                                                                                                                                                                                                                                                                                                                                                                                                                                                                                                                                  |
| ENSMUST00000048674.1 | 1 | 47      | ENSMUSG00000032295.1 | GTCATGGATTACCATCTAGAGACACGGTACTTCTTGGGACGACCT<br><b>GAGGGT</b> GGCTGTGTATGCACGCTTCTCTGGCTTAG                                                                                                                                                                                                                                                                                                                                                                                                                                                                                                                                                                                                                                                                                                                                                                                                                                                                                                                                                                                                                                                                                                                           |
| ENSMUST00000034865.1 | 1 | 39      | ENSMUSG00000032315.1 | CTGAAGGTGGTAGTTCTTGGAGCTTCCCCGATCCTCCCT <b>AGGGT</b> CC<br>TAGAGAACACTTCTCACTTCACTCCCTCTTACAGCCCAAGCAGCC<br>ACCTAGATC                                                                                                                                                                                                                                                                                                                                                                                                                                                                                                                                                                                                                                                                                                                                                                                                                                                                                                                                                                                                                                                                                                  |
| ENSMUST00000034878.1 | 1 | 32      | ENSMUSG00000032328.1 | GTAGCGGCAGCGGTGACTGCGGCTCTCTGT <b>AGGGT</b> CGGCGGCAC<br>GCAAGTCCCTTGGGCGGCCAGCTGGACGTGGCCGAGCCGAAGCCC<br>GGGGGCCG                                                                                                                                                                                                                                                                                                                                                                                                                                                                                                                                                                                                                                                                                                                                                                                                                                                                                                                                                                                                                                                                                                     |
| ENSMUST00000034997.1 | 2 | 118,273 | ENSMUSG00000032424.1 | TTCTTTTACGACGGAGCCTAAGATATTCCTTTGTCTTGTGGTGGAT<br>GAGTTACAGTCGGATGACCAAGTGAATATAGGGGTGCAACGAGGA<br>TTTGGAGGCTTCTGAGACTTGAAC <b>AGGGT</b> ACTGGTGAACCTTC<br>CTCGGAGAAGTGCGCAGCAGCTAATGATATTTCCGGATTTGGAGTCT<br>GGGCCCAGTGAGATTCTACTAAGCGGCTGACTGAAGGCCGAT<br>GCGTTCTAGTTCTTCTGAGTCCCGCGTGGGTAGGTTTTTACAG <b>AGG</b><br><b>G</b> TTTGCAGCCTTTTGTGCTGTTCCGAAGTACTAGAGTACCCGAAA<br>GAGACATCCATTATATGCACGTTTACAAAGGACA                                                                                                                                                                                                                                                                                                                                                                                                                                                                                                                                                                                                                                                                                                                                                                                                      |
| ENSMUST00000035205.1 | 1 | 179     | ENSMUSG00000032586.1 | AAAAGATTTCACTTCTGCTTTCGCCGGCTGGAGCAGACCTACTTTAT<br>AAAGTTATGTATGCTTCTTCTGAGGGAGTAATACTGCTAACGATAC<br>CGTAAAAATCGCTAAGGAGCCTCGCTTCAACTCAAGATGGCCTTTC<br>TCAGGGAGGACCTTAAATTAATCTGATGTGGGAATAATAAAG <b>AGGGT</b><br>TTGTTATTTCTTGGTCTTTGAAGCATCTGTACCTCCAAAATCACCA<br>TCCTACAGTCTCAGCTGGTTCCTGGGCTGCTTGGTGGTGGTGGTGGT<br>G                                                                                                                                                                                                                                                                                                                                                                                                                                                                                                                                                                                                                                                                                                                                                                                                                                                                                               |
| ENSMUST00000041081.1 | 1 | 56      | ENSMUSG00000032771.1 | GAAGCTAGGGGAGCGCGGCTATTGCCGCTGGCGCTTCCACCGCAGT<br>GTGAAGAAAA <b>AGGGT</b> CTGAAACAAGTCTTACCAACGCTGCTTTT<br>GAACACAGTACTGCTGGATCTTTAAACATCAAGTTACGCTTTGTC                                                                                                                                                                                                                                                                                                                                                                                                                                                                                                                                                                                                                                                                                                                                                                                                                                                                                                                                                                                                                                                               |

| ENSMUST00000050950.1 | 4 | 219,329,50<br>9,766 | ENSMUSG00000032806.1 | TGTC AACCTGTCTGAC<br>GCCGGCCCGGCCACTACTTGTGAGGAGCTCTGTGGCCCGGAAGC<br>AAGTGAGAGATTTCGACCGTTACCTTACTCTGGTTTTCTGCCTC<br>CCTCTTCATCAGCGAGATTCAAGGCTGGACCAGGGCCCCAGGGAA<br>AAAAATCCTGCTATCAAGGAAGAAAATATAGGACCAGGACCTCCCA<br>TGGACCCTTCTCAGGACATTTCCACAGCACAAGCAAGGGTGTCTCC<br>CTAAGACACAAGAGGCTGAAAAACTATCCTTTGTGAAGTGCCAT<br>GGTGGTCAAGAAAAGCAGAGGTAGCTCCAGCAGTTGCCTGGCCTG<br>GGAGACAGGGTGGTTGTACAGGTTTGTAGGCATGCTTGGAACTG<br>CCCTGCTGTTCATCAGCCTACCATGGGGAGCTCAAGTGATGGCCAG<br>TGCCAACATCAGCACTGCTCTGGCCACACAAGTGGTCACTATTTG<br>AGTATTGGGGATGGCTCAGTGACAGAATTTGATTTCCCTGAGAAGA<br>GT <b>GAGGGT</b> ATCATTGTGATCTCTAGCCAATACACTGGACAGACCAA<br>TGGGACAGGGCCCAGCCCCATACTTAAGGTTATATCCCTGGACACA<br>GAGGTGCTGACCAATAAGAATGTGAGTGCCATAACCTGGAGCAGTG<br>GAGGTGGCTTTGTGGTAGGCATCCACTCAGGCTTAGCTGGGCTGGC<br>CCCCTCCACCTCCAGCTCATGGATTTCTATGAGGCCCCACCCCTG<br>CTGATCGAAGAACGGAGAGATTTCTGCATCAGGGTGTACCTGCTG<br>AAGACCTCCCTTCTGCTCTCAACACCAACTTGGCCACTTCTCAGA<br>GAACCAATACTCTACTTGTCTTCTGCCTTTATCTTTGTCAACAAG<br>TGTTCAATTTGGTTGCAAAGTGGAACTTGAAGTTTGAAGGAGCTCC<br>TACAGAGCCCCAACCCATGCTGTGGGCTCTTGGGCCAGTTTCT<br>GGTCAATGCCTTCTATGCTTTCCGTGATGGCCAAAGCTTCATGCTA |
|----------------------|---|---------------------|----------------------|------------------------------------------------------------------------------------------------------------------------------------------------------------------------------------------------------------------------------------------------------------------------------------------------------------------------------------------------------------------------------------------------------------------------------------------------------------------------------------------------------------------------------------------------------------------------------------------------------------------------------------------------------------------------------------------------------------------------------------------------------------------------------------------------------------------------------------------------------------------------------------------------------------------------------------------------------------------------------------------------------------------------------------------------------------------------------------------------------------------------------------------------------|
| ENSMUST00000037967.1 | 1 | 188                 | ENSMUSG00000032806.1 | CGAGGCCCGGGCAGGACGGGCTCACTTGGCCGGCTTTGGCCGCC<br>GGGCCACTACTTGTGAGGAGCTCTGTGGCCCGGAAGCAAGTGAGA<br>GATTTTCGACCAGGAAAAATCCTGCTATCAAGGAAGAAAATATAGG<br>ACCAGGACCTTCCATGGACCTTCTCAGGACATTTCCACAGCACA<br>AGCA <b>AGGGT</b> GTCTCCCTAAGACACAAGAGGCTGAAAAACTATCC<br>TTTGTGAAGTGCC                                                                                                                                                                                                                                                                                                                                                                                                                                                                                                                                                                                                                                                                                                                                                                                                                                                                            |
| ENSMUST00000062098.1 | 1 | 21                  | ENSMUSG00000033006.1 | TCAGTCTCGGCTGTCCAGCC <b>AGGGT</b> CTTTGGTGGTGAGGATTACAGG<br>CTCCGTCCAGACAAGGCAGTGGCCTGAGGCTCAGGGCCCCCAGCC<br>CCTCCCTCCAGTCCATCAGCGTCACTCCCAGCCCCGAGCTGGAC<br>CGCACACCTTGGGACACGGTTTTTCCACTTCCCTCAGGACGAGCCCCA<br>GACTGGAGGAGAGGTTCGGAGGAGGTGGGCGTTGGGCTTTCACGAG<br>GACCCCGGCGGGGCCCGGGGAGGCGGCCGAAGCGGCGGGCC<br>GGGAGCGAC                                                                                                                                                                                                                                                                                                                                                                                                                                                                                                                                                                                                                                                                                                                                                                                                                            |
| ENSMUST00000040019.1 | 1 | 85                  | ENSMUSG00000033006.1 | CAGGACTGGGTCTCCTTTCCAGGGAGAGGAAGAGCCCTTCATGGAA<br>CCGTCTGCAGCGGCTCAGTCAGTCTCGGCTGTCCAGCC <b>AGGGT</b> GTT<br>TGGTGGTGAGGATTACAGGCTCCGTCCAGACAAGGCAGTGGCCTGAG<br>GCTCAGGGCCCCCAGCCCCCTCCCTCCAGTCCATCAGCGTCACTC<br>CCCAGCCCCGAGCTGGACCGCACACCTTGGGACACGGTTTTTCCACT<br>TCCTCAGGACGAGCCCCAGACTGGAGGAGAGGTTCGGAGGAGGTGGG<br>CGTTGGGCTCTTACGAGGACCCCGGCGCGGGCCCCGGGGAGGCG<br>GCCGAAGCGGCGGGCCGGGAGCGAC                                                                                                                                                                                                                                                                                                                                                                                                                                                                                                                                                                                                                                                                                                                                                     |
| ENSMUST00000050006.1 | 1 | 151                 | ENSMUSG00000033545.1 | TGCTTTTCCACCCCGGGATTTTTTTTGGAGGATTTCCCCCTCAC<br>CTTTTTTCATTTTTCTCCCTCGGGCTCTTTTGTGACTCTCCCCA<br>ACCCCAACCTTCCGCTTTATGTTTCGCCAGACCTCCACCCGCTTC<br>TGAGTAGTGGGG <b>AGGGT</b> TTACAGCTCCACGTTCCCGCCCCACCG<br>GGCCCCGGCGAAC                                                                                                                                                                                                                                                                                                                                                                                                                                                                                                                                                                                                                                                                                                                                                                                                                                                                                                                              |
| ENSMUST00000042012.1 | 1 | 129                 | ENSMUSG00000033732.1 | CGCCGGCGGATCGGCAGTGGCGGTGGCTTAGGCCCTGAAGCGATT<br>AGCATCCGTCCGGTACCGAAGCCATCCTTCTTGAGCAGGCTCTGCT<br>TTGCCTTGAAACCGTTGCTGTAACCAAGAGTTGACT <b>GAGGGT</b> CACA<br>GCTTTGCTTGTACC                                                                                                                                                                                                                                                                                                                                                                                                                                                                                                                                                                                                                                                                                                                                                                                                                                                                                                                                                                         |
| ENSMUST00000054613.1 | 1 | 129                 | ENSMUSG00000033732.1 | CGCCGGCGGATCGGCAGTGGCGGTGGCTTAGGCCCTGAAGCGATT<br>AGCATCCGTCCGGTACCGAAGCCATCCTTCTTGAGCAGGCTCTGCT<br>TTGCCTTGAAACCGTTGCTGTAACCAAGAGTTGACT <b>GAGGGT</b> CACA<br>GCTTTGCTTGTACC                                                                                                                                                                                                                                                                                                                                                                                                                                                                                                                                                                                                                                                                                                                                                                                                                                                                                                                                                                         |
| ENSMUST00000044369.1 | 1 | 105                 | ENSMUSG00000033793.1 | CACGGAGTCGCCTTCGTTCTGCTCTGGGCTCCTCCGTGGCCACTGAG<br>ACCTCGGAGCTCGACCGGCGCTGCCGCCCGTGGCCCTCACTC<br>CCCGAGGCTATC <b>AGGGT</b> CTGTGGGAAACATTCAAAGTCATAAAGT<br>TTAG                                                                                                                                                                                                                                                                                                                                                                                                                                                                                                                                                                                                                                                                                                                                                                                                                                                                                                                                                                                      |
| ENSMUST00000036996.1 | 1 | 42                  | ENSMUSG00000033938.1 | AGTCTTCCAGGTGGGAGCGAGGTGACCCCGGCTACTAAAGA <b>AGGG</b><br><b>TAAGC</b> CAGAGTAGCC                                                                                                                                                                                                                                                                                                                                                                                                                                                                                                                                                                                                                                                                                                                                                                                                                                                                                                                                                                                                                                                                     |
| ENSMUST00000042664.1 | 1 | 41                  | ENSMUSG00000033965.1 | GGACAGGCTGGCCAGCTCGGGCGCTGGGAGGAGGAGGAGCG <b>AGGGT</b><br>CTCAGGCAGCCGCGCGGAGTGTCTCGGAGCGGAGGAGCAGTAGC<br>AGCAGAAACAAGTACCAGCCAGACAACAGCTCCTCCGGCAAGCCAC<br>AGTCAGTCCCCCTAGCCGCG                                                                                                                                                                                                                                                                                                                                                                                                                                                                                                                                                                                                                                                                                                                                                                                                                                                                                                                                                                     |
| ENSMUST00000048082.1 | 1 | 88                  | ENSMUSG00000034053.1 | GTGTGCGGCCGAGGGGACTCCGCGCGGACGACAGCTCCCGGCTGAG<br>GCTGCGTGAAGGATCCGCTTCCGGCGGCCCTACTGCGAC <b>AGGG</b>                                                                                                                                                                                                                                                                                                                                                                                                                                                                                                                                                                                                                                                                                                                                                                                                                                                                                                                                                                                                                                                |

|                      |   |                   |                      |                                                                                                                                                                                                                                                                                                                                                                                                                                                                                                                                                                                                                                                                                                                                                                                                                                                                                                                                                                                                                                                                                                                                                                              |
|----------------------|---|-------------------|----------------------|------------------------------------------------------------------------------------------------------------------------------------------------------------------------------------------------------------------------------------------------------------------------------------------------------------------------------------------------------------------------------------------------------------------------------------------------------------------------------------------------------------------------------------------------------------------------------------------------------------------------------------------------------------------------------------------------------------------------------------------------------------------------------------------------------------------------------------------------------------------------------------------------------------------------------------------------------------------------------------------------------------------------------------------------------------------------------------------------------------------------------------------------------------------------------|
| ENSMUST00000035840.1 | 1 | 73                | ENSMUSG00000034075.1 | <p>TGGTGTGCGCTGTCACCCACGGGCTCAGCGGGCGTCCC GCGACGG<br/> CCTTTCGCTGAGCTGGCCCGGGCTGCGATCCCTGCGCGTGC AAG<br/> CCGAGGCCCCGCGGCC</p> <p>ATCACCTTTCCTCCCATGTGCTTTCCTTCATTTGAGATCTTTT<br/> GACCTTCATTTTATTTGGGAGGGGAAAGGGTGATAAATTATACATT<br/> TTCTGTTTTCCCCAGTTTCTTTCCTCTCTGTTTCCCTCATCCCATT<br/> TTCTTGCTGCTCTGCGCGCTGTGTGGGCTTGGGCTATGCGGCAGGG<br/> CACATCTTTCATCAGAGCTCCAAC</p>                                                                                                                                                                                                                                                                                                                                                                                                                                                                                                                                                                                                                                                                                                                                                                                                  |
| ENSMUST00000040721.1 | 1 | 26                | ENSMUSG00000034118.1 | <p>CGGCACGGCTGCGCCTCCGCCATCGT<b>AGGGT</b>GCCGATCCCTTGCC<br/> ACAGTCGAGTCTCCATGGCCTGACCGTGTCTTGACAATAAATTTGA<br/> GCAAATCTATGTCTAATAAGAAGATAACCACATCAAG</p>                                                                                                                                                                                                                                                                                                                                                                                                                                                                                                                                                                                                                                                                                                                                                                                                                                                                                                                                                                                                                   |
| ENSMUST00000051232.1 | 1 | 119               | ENSMUSG00000034120.1 | <p>CGTCAGGTTCCGGTGTCTGCGGGCGGCTTGC GGCTCCCTCCCTAC<br/> CCACGAGGACTGTAGCTACCGAGCGCCTGACGGAGCTGCGTTTCCG<br/> GAGAGCGAGGGCCTGTCCGGGGCGT<b>AGGGT</b>CTCGGCGCGCTTCG<br/> CAGCC</p>                                                                                                                                                                                                                                                                                                                                                                                                                                                                                                                                                                                                                                                                                                                                                                                                                                                                                                                                                                                                |
| ENSMUST00000047473.1 | 1 | 129               | ENSMUSG00000034120.1 | <p>CTCAGGCGTCCGTACAGTTCCGGTGTCTGCGGGCGGCTTGC GGCT<br/> CCCTCCCTACCCACGAGGACTGTAGCTACCGAGCGCCTGACGGAGC<br/> TGCGTTTCCGGAGAGCGAGGGCCTGTCCGGGGCGT<b>AGGGT</b>CTCGG<br/> CGCCGCTTCG CAGCC</p>                                                                                                                                                                                                                                                                                                                                                                                                                                                                                                                                                                                                                                                                                                                                                                                                                                                                                                                                                                                    |
| ENSMUST00000039679.1 | 1 | 24                | ENSMUSG00000034558.1 | <p>ATTCTCAGGGAAAGCTGTGTG<b>AGGGT</b>TGGAGGGAGGGAAGATTG<br/> GATGCTGAGCCCTGTGAGAGCCAGGGATGTGATTGGGGTCTATT<br/> AACTGGCTCCAACATCCAAGGTTTATCTGTGCAACCATTTCTCTGA<br/> GG</p>                                                                                                                                                                                                                                                                                                                                                                                                                                                                                                                                                                                                                                                                                                                                                                                                                                                                                                                                                                                                     |
| ENSMUST00000058094.1 | 1 | 4                 | ENSMUSG00000034681.1 | <p>AAG<b>AGGGT</b>GGGAGGCGAGGTTCGATGTCTGTGCGCGGAGCGGACGGT<br/> GCAGATTGCGAGCCCGCCTAAAAGTGCTCTTTGGCGTAAATTGCAA<br/> TCGATTAGGGATCGTTTCTCAGACTCAAGTTAGAAGTGAGAGTCA<br/> GATAAGTGAGCCGACATGTCTGCCTTGAAGAAGGGGAGA</p>                                                                                                                                                                                                                                                                                                                                                                                                                                                                                                                                                                                                                                                                                                                                                                                                                                                                                                                                                            |
| ENSMUST00000040344.1 | 1 | 841               | ENSMUSG00000034707.1 | <p>CACCTGACGTCCACAGAGGCAGCACGGAGTGGCGAAACTCGGTTTC<br/> CAGCCTGTCTCGGCAGTGAGCGGTTTAGCTTTACACAGCCCTCTG<br/> CCCAGCTTTAACTTGTAAAGACAGCTATGAGTCACTTTGAGAATTC<br/> AGAGGCCATGTTGGGGGACAGCCATTGAGTTTATTCCTTTACCTC<br/> ATGTGACCCAGCAACTTTGGTGATACTGAGAGGCCAGCAGGCAGT<br/> AGAGTGGACACCTCGGCCGTGGCCACTTTAGAGGGGAAAAGTTTA<br/> AGTTTAAACTAAAAGTTACAGAATTGAATGTGGATACCGGCTTCA<br/> TTACCCCCACTTGGATTCTAAACATGACCAGTGAAAATAGTGAAAG<br/> CTGACCACAGTTGTTCCCAAATAAAGGTCGGCAGCTCCTACCAGGT<br/> CTGGGATTGAGATGTTAGAGTCTTCAGTTTATAGCCGGCTCCTGA<br/> AAGCAGGCGACATCAGAGTGGTAACAGTCACTAGGCTGCAGTAGGT<br/> GTCTTACCTCGAGGCCCTCAGATGGAGGTAACACATTAGGATTTGTG<br/> GGACACAAGATCCTCTCTGAACCTCCTGGTTAAGGAACCTTCTTGC<br/> AAACATTC AAGTAGACCTTCTATAACAGACTGCAGCGTGCATGCGCC<br/> TCTACCCACAAGAGATGCACTGCAGGAGCCGGCCCTGTTCTCTGT<br/> ACTCAGCATTTTGACATCTCCTTTGAAGGCCAGGTATATGTGTACC<br/> AGTGCTTTCAAAGGGAGAACCATTAAAACCAACATGGAATGCAGG<br/> GACTTCGCCCTTATAAGATTTCCAGTTTTAAAAC TGCCCTCAGATA<br/> CAATTTCAAAGT<b>AGGGT</b>ACACATTAGAGTGTCTTTGAGTTCAACAA<br/> GTTGGTACTGTGCAAAACCTTCTGAATTGCCAGCGCCCGGGTTT<br/> TTATGTAAAAATAGAGTGGCT</p>                                                                |
| ENSMUST00000038488.1 | 3 | 530,1113,1<br>406 | ENSMUSG00000034908.1 | <p>GCTCCTGGTAGCTCCGAGTTCTGCGCGCGTCCGCCGCCCTTAAAG<br/> GGCCCGGCTCCGGGAAGCCTTCCGGGCCAGGGCCACCGCCGCTCGG<br/> CTCTCCGGGCGCGAGCGGACCGGGTCTCCAGCCGGCTGGGCCG<br/> GGCTGGGCCGGGCTGGGGTAGCGGGTCCGCGGTGCCGCCCTCGCGAG<br/> CCGGATCCGCGCGAGGCCAGGAGCGGCTCCAGGGAGGGGACGCG<br/> TCCTATCTGAGGCCGGGTTAAAGTTCTGGTCCCGGTGAGATGCTG<br/> GAAGTGTCTGCGGCAGCCGCAACGCGCCCGGTGCCGCTCCCGTCCG<br/> CAATCCCCGCGCTCCCGGCCATGATCGCTGGCGTCTGCCCTTGT<br/> GCGTGTCTTTGGTGGCCTCCGTGAGAGCCACCTGGGGGCCCTGGG<br/> GCCCAAGAACGTCTCGCAGAAAGACCGGAGTTTGGAGCGCACCTAC<br/> GCGGACGACGTCAACAGCGAGCTGGTCAACATCTACACCTTCAACC<br/> ACACCGTGACCCGCAACCGGACCG<b>AGGGT</b>TGCGGAGTGTCTGTGAA<br/> TGCTGTAACAAGCAGAAAGGGGGCCTTTGCTGTTTGTGGTCCGC<br/> CAGAAGGAGGCTGTTGTGCTCTCCAGGTGCCCTAATCTTCCGAG<br/> GACTATATCAGCGGAAGTACCTCTACCAAAAAGTGAACGAACCTCT<br/> GTGTGAGCCCCCACAAGAATGAGTCTGAGATCCAGTTTTCCTAT<br/> GTGGACGTGTCTACCTGTACCCGTCAATACCACTTACCAGCTCC<br/> GAGTCAACCGTGTGGACAATTTTGTGCTCAGGACTGGAGAGCTGTT<br/> TACTTTTAAATACCACTGCAGCCAGCCAGTACTTCAAATACGAG<br/> TTTCTGTAGGGTGTGGACTCGGTAATTGTC AAGGTGACCTCCAAGA<br/> AGGCCTTCCCTGCTCAGTCACTCCATCCAAGATGCTCTGTGCC<br/> TGTCTATGATCTGGACAACAATGTAGCCTTCATTTGGCATGTACCAG</p> |

|                      |   |                      |                      |                                                                                                                                                                                                                                                                                                                                                                                                                                                                                                                                                                                                                                                                                                                                                                                                                                                                                                                                                                                                                                                                                                                                                                                                                                                                                                     |
|----------------------|---|----------------------|----------------------|-----------------------------------------------------------------------------------------------------------------------------------------------------------------------------------------------------------------------------------------------------------------------------------------------------------------------------------------------------------------------------------------------------------------------------------------------------------------------------------------------------------------------------------------------------------------------------------------------------------------------------------------------------------------------------------------------------------------------------------------------------------------------------------------------------------------------------------------------------------------------------------------------------------------------------------------------------------------------------------------------------------------------------------------------------------------------------------------------------------------------------------------------------------------------------------------------------------------------------------------------------------------------------------------------------|
| ENSMUST00000048250.1 | 1 | 139                  | ENSMUSG00000035476.1 | ATATGTGGATACACTGAAAAAGATAACAATAATCATGTCTCAAGAA<br>GAGCATGATATGTAACATCTCTCACACAACCTGCGACAAAACCTGT<br>GAAAATCGTAATGGTGGGAAAACAGGCGCAAACCCATGGACTTGGAA<br><b>AAGGGT</b> GAAAGGCTTGTAAGGTGGGTTTCTGTGCGATCCCCAGGAAG<br>CAGTCTAGCAGTCCCTACTGTTCTTAAAGGTGCCCTTGCCCTTTGTGT<br>AGTTTTTGTCTCCCTTAGAGATGGACAACCTCCACTTGCATATTATGA<br>GACAAGTTAGGAGGAACATATACACTACTTGACATATCTGACTAAA<br>GGTGTCCCAGTGTTCGTAATAAGATGCTGAAATACCGACAGCATGA<br>CACTTGTCACTTGACCATGAAAGAAGCATGTGTGAAAAGTCTGATG<br>CTTTATTAATAACTATTGCATGAAAACCTACCAAGGTCAATAAGCTG<br>TTAACATACAGTAGATGC                                                                                                                                                                                                                                                                                                                                                                                                                                                                                                                                                                                                                                                                                                                                               |
| ENSMUST00000038384.1 | 1 | 64                   | ENSMUSG00000035851.1 | CAGGATGCAAGATTTTTTCCTCATAAAGAGTAATAACCATGAGAATG<br>TGTCTCTTGCCAAAGCA <b>AAGGGT</b> GTATGG                                                                                                                                                                                                                                                                                                                                                                                                                                                                                                                                                                                                                                                                                                                                                                                                                                                                                                                                                                                                                                                                                                                                                                                                           |
| ENSMUST00000049411.1 | 1 | 27                   | ENSMUSG00000035960.1 | AGGCAGACTCCATTTCTTTGTGCCGT <b>AAGGGT</b> CTCTGGCTTCGTTGG<br>GAGGCGAGCGAGTAAACACTGCTTCGGTGTCCAGGAGCTTAAGGG<br>CTTTCGTACAGCG                                                                                                                                                                                                                                                                                                                                                                                                                                                                                                                                                                                                                                                                                                                                                                                                                                                                                                                                                                                                                                                                                                                                                                          |
| ENSMUST00000047766.1 | 1 | 38                   | ENSMUSG00000036106.1 | GTGCAAGGCTCCGCCAAGGTCACAGGCGAGCAGGCC <b>AAGGGT</b> ACCC<br>CTTCCCTCGCCACCTTGCAGCTTCTGGCTCCTGAGCAGGTTGAA<br>GTTT                                                                                                                                                                                                                                                                                                                                                                                                                                                                                                                                                                                                                                                                                                                                                                                                                                                                                                                                                                                                                                                                                                                                                                                     |
| ENSMUST00000035496.1 | 4 | 387,421,62<br>2,1577 | ENSMUSG00000036180.1 | CCGGGCTCCATGTGTGCGGCCGAGGGGCGCATTATCTGGCCGGCGG<br>CGCGGGGGGGCGAGCGGGGAGCGAGCGCCGGGGCCCGGGCGGG<br>CCCTCAGGCGCAGCGAGCACGCGCGGGCCGGCGCCCGCCCGCCAG<br>CCCTGTGGACACGCGCGCTGCCCCCTGGGCGCGGTGCGGCGCGCGC<br>GGGTTGGCCAGCACATTGAGCCAGCACATCCACATAAGTTGCCCTT<br>TGACAGAACTGTGGCCATGGCAGCATGGTAGGATCCGTGTCCCGGA<br>CCCTGAGGCCAGAATGAGTGAAGAAGCATGCCGAACCCGAGTCAG<br>AAGCGCACCCCTTGAACCTGACCTAACGGAGGATGATGTGGAGAACA<br>AGAAAATGAAAATGGAGAA <b>AAGGGT</b> CATCAGAGCTGACAGTGGACGG<br>AGACAGCA <b>AAGGGT</b> GATGCCAGAGCCGAGTGCAGGCTCAGCCAGGGG<br>TTGCTGAGGACAACAGAGGCCATGGGCACAGGATCTGGCGAGGGGC<br>TGTTAGGAGACGGGCTGTGGACATGCGCACTTACACAGTGACAT<br>GAAGTCTGAGAAGAGACCTCCCTCGCCTGATGTGATTTGTGCTCTCT<br>GACAGTGAGCAGCCATCGAGCCCC <b>AAGGGT</b> GAAATGGCTGACCACAG<br>TAGCCTTGAAGACACCAGCACTGAGGCGCTCTTGAAGAAGCAGCCC<br>AGAAGAACGAGAGCGGATGATCAAGCAGCTGAAGGAGGAGTAGG<br>CTAGAGGAAGCAAACTGGTCTTTGTTGAAGAAGCTGCGGCAGAGTC<br>AGATACAGAAGGAAGCCACCGCACAGAAGCCTACAGCTTCCCTCAGG<br>GAGCACTGTGACCACCCCTCCCCACTCGTGGGGGTACCCAGAAC<br>ATTCTGTGCAAGACCTCACTTCAGACCTCCTCCACTCGAATAC<br>CCGGCAGCATCATCCACCACCCTGGTCCGAGGTGGGCAGCAGGT<br>GTCTGCCAAACTGGGACCACAGGCCAGCTCTCAAGTAGTCATGCCA<br>ATCAGTTTTCCGCTTACGTCCGACCTAATGAGGTTCCCCAGCAGCT<br><b>AAGGGT</b> CCTACCTAGCACCTCAAACCTTGTCTGTGAGAGGCCAG<br>TGGGAAGAAGACTCAGCTCTCATCCGCC |
| ENSMUST00000040299.1 | 1 | 48                   | ENSMUSG00000036315.1 | GCA <b>AAGGGT</b> ACAGCTCCTGCCCTTCACTGACGGGCGGGGAGCTGA<br>CAGGAGCCGGGGCGGGCGGGCGGCCAGCGAAGGAGCGCACGGC<br>GGCCCGGGCCCGCCCTGGTCTCCCGCCAGCCTCAGTGACCTTCA<br>CTGGTTCGGGCGGGGCTGACGGCCCGGGCGGGCGGGCGGC                                                                                                                                                                                                                                                                                                                                                                                                                                                                                                                                                                                                                                                                                                                                                                                                                                                                                                                                                                                                                                                                                                   |
| ENSMUST00000036509.1 | 1 | 3                    | ENSMUSG00000036352.1 | CAGTGGCCCCGAGGAGCAGTGCAGAGTTCCCCAGCGAGGCTAGGC<br>GAGCAGCCGGCCGGCCGGAGCGGAGAAGGG <b>AAGGGT</b> GGGAGCGAGGC<br>GCAGAGCCGGCGCCGCGCACTGTGGGGGCCAGGAGCAGCCCGCGC<br>CCGAGGGAGGGACTCGCACTTGCAAT                                                                                                                                                                                                                                                                                                                                                                                                                                                                                                                                                                                                                                                                                                                                                                                                                                                                                                                                                                                                                                                                                                            |
| ENSMUST00000043098.1 | 1 | 76                   | ENSMUSG00000036390.1 | CCCGCTCGCCGTTAGGGAGGCTCTGCGCCTCAGCCGCCACCGCCTC<br>CGCCTCCGCTCCGCGCTCCCGCCACTTCTCCGCTGTGCCGCC<br>GCCGCTGCCCGGGTCTCCGGGGGTGCTACCGGGCTGGCCCGC<br>GCCACTGCAGTCGCTTACGCTCGCGCTAGAGGCGCTTACAGGAG<br>AGACCCGCGCGCCGCGTGCCTT <b>AAGGGT</b> TCAGTCTCGCCTCG<br>TCGACGTGCGCA <b>AAGGGT</b> CTGGAAAAGCGGCCAAGGCCGGGAACG<br>GGGCTTCGCGGTTCACACGATTAAGTTCTGAAGTACTGATCGAGTT<br>CTCAAACAGCCATAAATGACAGAACGATGCTTGTCTCAGTGGAGGAA<br>GCTGGTGCAGAAGCCGTGTTTTAAACTTAGGTGTTAAGTACTCAA<br>AGAAAAGACAGCTTTGATTTCTGGCTGCAAAAAGCT                                                                                                                                                                                                                                                                                                                                                                                                                                                                                                                                                                                                                                                                                                                                                                                           |
| ENSMUST00000040506.1 | 1 | 243                  | ENSMUSG00000036501.1 | AAGATAGAAGCCAACCGTAACGCTGCTACACAGGTGCCCGAGAGG<br>CAGGCCGCACTATCTTCTACAAGCCCTCCACGGAGAAATCCAGTG<br>TGGCGCCATCTGATAGGTGCCAGCGAGAGCTTCCCATGCGGGCTCG<br>GAGCATCTGCCCTATCCACTGGGCAGTCGTGATGGACTCGTCGCCA<br>CAGCCGTGCTGCACCGCGGGGGCTGAATCTGACAGCAGTGCAGT<br>AACTGCCGAGAATGACCACACTGTTGCGTTCTGGGCACCTCAGAT<br>GGCCGATCCTTAAGGTGTACCTTGTCCAGACGGCACTTCTGCAG                                                                                                                                                                                                                                                                                                                                                                                                                                                                                                                                                                                                                                                                                                                                                                                                                                                                                                                                                 |
| ENSMUST00000042858.1 | 1 | 1593                 | ENSMUSG00000036606.1 |                                                                                                                                                                                                                                                                                                                                                                                                                                                                                                                                                                                                                                                                                                                                                                                                                                                                                                                                                                                                                                                                                                                                                                                                                                                                                                     |

|                      |   |      |                      |                                                                                                                                                                                                                                                                                                                                                                                                                                                                                                                                                                                                                                                                                                                                                                                                                                                                                                                                                                                                                                                                                                                                                                                                       |
|----------------------|---|------|----------------------|-------------------------------------------------------------------------------------------------------------------------------------------------------------------------------------------------------------------------------------------------------------------------------------------------------------------------------------------------------------------------------------------------------------------------------------------------------------------------------------------------------------------------------------------------------------------------------------------------------------------------------------------------------------------------------------------------------------------------------------------------------------------------------------------------------------------------------------------------------------------------------------------------------------------------------------------------------------------------------------------------------------------------------------------------------------------------------------------------------------------------------------------------------------------------------------------------------|
| ENSMUST00000045604.1 | 1 | 99   | ENSMUSG00000036850.1 | AGTATGGTTCATCCAGTAGACATCAATAAGAAAATCAAGCAGGA<br>CCTGGCACTGTCTGGAAACCTGTCCAGTCTGTATGCTATGACCCAG<br>GACAAGGTGTTCGGCTCCCAGTACAAGAATGCCTGAGCTATGTAA<br>CCTGGCTCAGTGTGTGACTCCCAAGATCCCTACTGTGGCTGGTG<br>TGTCATCGAGGGACGATGCACCAGGAAGTCCGAGTGTCTACGGGCC<br>GAGGAAACCGGACACTGGCTGTGGAGCCGGGAGAAGTCTGTGTGG<br>CCATCACTGATGCCTTCCACAGAACATGAGCCGGGGGGCCCAAGG<br>AGAGGTACGCCTGTCTGTAGCCCTGCCCACCTGACTGAGGAC<br>GATGAGTTACTGTGCCTTTTGGTACTCACCACCCACCTGCCC<br>GGGTAGAGGACGATACCGTCATCTGTAATTCCCCAAGCAGCATCCC<br>TAGTACACCCAGGCCAAGACCATGTTGACGTGAGCATCCAGCTC<br>CTCTTAAAAAGCGGCAAGTGTCTTCTCACCTCCCACAGTATCCCT<br>TCTATGACTGCCGTGAGGCCATGAGCCTGGTGGAGAACCTGCCGTG<br>CATCTCTGTGTAGCAACCGCTGGACTTGCCAATGGGACCTGCAG<br>TACTACGAGTGTCCGGAGGCTTCGCCCAACCCAGAGGAGGGAATCA<br>CAGGGAGGACCTTGTGTGCCTTGGAAAGGAGTGACCCGGTACGGCG<br>TGTTTTAAACCGGCTCAGGCTGGGAAACCGTGTCTGAGCTGTCTCA<br>GGTCGAAAGGGTTCCTCCCTTCTCCCTTGGGGCCGAGCTCTAGAG<br>CCGTGAGCCAGAGCTGATTTATCCAGAGCCAGC                                                                                                                                                                                                                                                      |
| ENSMUST00000050641.1 | 1 | 166  | ENSMUSG00000036965.1 | GCTTGGATCCAGAGCCAGCCTGGGAGGAACCGGGCTGTGGTG<br>TACCACCATCATCCCAACACTCTGTTTCCAGAAAGATGGGTGGGAA<br>ATCAGCCGATGACCAAGTGGGAAATGAGCTACAAGATCACCTGAT<br>CTTCATCAGTGAGAAAGCTTTCACACAAGAGGGTGTCTAGAAAT<br>CCGTGTCCCTGCGCTCCCGTCCGCTCAGCGGGCGGGCCGGCAGGAT<br>GGAGCCGACGACGTGCGCCCGGTGCTTGGATCCAGAGCCAGCCAGCC<br>TGGGAGGAACCGAAATCTTCAGTACTCCTCTCGCAACATGAACGT<br>TTAAAGCTAAAACCTTTCACAGAGATGTGAGATGGAGCAGGAGCAGT<br>GGCTAAATGTGAACTCTTCAAAACTTGGCGTATGGGCTGTGGTG<br>TACCACCATCATCCCAACACTCTGTTTCCAGAAAGATGGGTGGGAA<br>AGTGAAAGTCTAATCAGTACAGCCGATGACCAAGTGGGAAATGAG<br>CTACAAGATCACCTGATCTTCATCAGTGAGAAAGCTTTCACACAAG<br>AGGGTGT                                                                                                                                                                                                                                                                                                                                                                                                                                                                                                                                                                                |
| ENSMUST00000061519.1 | 1 | 367  | ENSMUSG00000036965.1 | CCGTGTCCCTGCGCTCCCGTCCGCTCAGCGGGCGGGCCGGCAGGAT<br>GGAGCCGACGACGTGCGCCCGGTGCTTGGATCCAGAGCCAGCCAGCC<br>TGGGAGGAACCGAAATCTTCAGTACTCCTCTCGCAACATGAACGT<br>TTAAAGCTAAAACCTTTCACAGAGATGTGAGATGGAGCAGGAGCAGT<br>GGCTAAATGTGAACTCTTCAAAACTTGGCGTATGGGCTGTGGTG<br>TACCACCATCATCCCAACACTCTGTTTCCAGAAAGATGGGTGGGAA<br>AGTGAAAGTCTAATCAGTACAGCCGATGACCAAGTGGGAAATGAG<br>CTACAAGATCACCTGATCTTCATCAGTGAGAAAGCTTTCACACAAG<br>AGGGTGT                                                                                                                                                                                                                                                                                                                                                                                                                                                                                                                                                                                                                                                                                                                                                                                 |
| ENSMUST0000000506.1  | 1 | 9    | ENSMUSG00000037017.1 | GATTTTCGAGAGGGTGGGACGGGTTTTCAGGACTGTGGTTCTGGTTCG<br>GGGAGTTCCATGGTGGTTCGGGAGATTGAGGAGGAGCGCCCC<br>GCCAGCCGTCGTGCGCGCCCGCTTAAGGAAAGGCTTTTCCACCC<br>CCGAGGGCTCCCTGGAACAAAACCTGATCTTTTGTCTCCGGAAT<br>CGCATTTCTAGTCTCTCCGTTATTTGTCTGTACCTGACGGAAACTG<br>CCCTCTTCTTCCCAAGAGCCCTGAGATCTAAACTCAGAACT<br>AATTTGTAAGAATAAGCCCAAGTGTAGAAACCTCTGAAAACCGAA<br>TCTCCTCAGTCTTGAGTCTTGTCCAGTCCAGGCGGGGAATTTGGTCC<br>CGGTGGGCTTTGTGCGCACTGGACAAGGATTTGTCAAGTCTGGAA<br>AGATTTTTCAGACGATCGTTTGTAAAACGCGTATAGGATAGAAAGGT<br>GATTTGATTTATTTGGTGGCTGACATAGTTGGAATCTGTTGAAAGG<br>GGACTTAAAGAATTTGTGAACAACAACAACAATAACAGGA<br>AAATTTGTTTTCAAGTGGTGGAAAGGCTTCTGAAGAGAGACTGAGTA<br>TTGGTTCAGGGCTATGAAATGATGCAGAAATTTGGTCACTCTGAG<br>CTACTAGATCTGCCAGTAGTTATGCTCTTCAGAAATTTATGGCCGTG<br>CCTGGAAGCTTTTGAATAATGATTTGCTCGGTTTGGAGCGGGGTC<br>TTACTGTATGGCTTACACTGGTGTATAATTTGGTGTATCTCCTGTCT<br>CTGTTCTCTTCAGTGTGTAATTTACAGGTATGCACCACCACGACTT<br>CAGCTTGGAGTTTCCAAGTGCAGAGTGTCTTAAGGGCATTATCTAC<br>TACAAGGTTTGAAGAGTGGCACTTTAAGAACCAGAAACCCAAAGGT<br>ACCAGGTCTACTCTAAAAGTCTGCTGGCTCGGGAATCTGTG<br>TCAGTCAACCACAACGAAGGGTAACTCAGGTGTCTCCAGCGTTACCC<br>GGGCCCCGAGGGCCAGCCAGGGCTTCGGCCTGTGGGCGCTGGAGGG<br>GCAAGCCAGTCTGTCTACGAGCTGGCA |
| ENSMUST00000046983.1 | 1 | 17   | ENSMUSG00000037049.1 | TCAGTCAACCACAACGAAGGGTAACTCAGGTGTCTCCAGCGTTACCC<br>GGGCCCCGAGGGCCAGCCAGGGCTTCGGCCTGTGGGCGCTGGAGGG<br>GCAAGCCAGTCTGTCTACGAGCTGGCA                                                                                                                                                                                                                                                                                                                                                                                                                                                                                                                                                                                                                                                                                                                                                                                                                                                                                                                                                                                                                                                                      |
| ENSMUST00000042512.1 | 1 | 41   | ENSMUSG00000037262.1 | GAGCCAGTTCGCTTCCGACCGCTTTGTAGTTGTAGCGCTCAGGGT<br>CGCC                                                                                                                                                                                                                                                                                                                                                                                                                                                                                                                                                                                                                                                                                                                                                                                                                                                                                                                                                                                                                                                                                                                                                 |
| ENSMUST00000041418.1 | 1 | 1172 | ENSMUSG00000037286.1 | AGCAGAGGGCGGTCCGGACCCGAGTCTGCAGCGGCCCATTTGGCGT<br>GTGGAAAATGCCACCAGATGGCGGGTTAGGATTCAGCTCCGTTGA<br>AGGCGCGGCCCGCTCCGAAACCCCGCGACCAACCCGTAACCA<br>CCCCCCACTCGGGAATAACACACCCGGAGACTTTTGGGGGAAAC<br>TAGGTCGACGGCCGACAGCGCCCGATGGGCGAGTGTGGTGTGACT<br>TTGAGGTTGAATAACCAGTTTGAATTTATACAGAAATTTCTGTACTG<br>TGGAATAGCTTCTCCAGCAATGATTTACTTCAGAGTTACCAAGTGT<br>CAGGATTCAACTAATGAACTACTGCCCCACTCTGATGTGGCAGCG<br>AATTTGAAGAAACAGAGGTCAAAGGAAAAGAAAAGGGGTCGTCC<br>TGGCCGGCTCCATCAACAATAAGAAACCTCGAAAATCTCCAGGA<br>GAAAAGAGCAGAAATGAAGCTGGAATTCGAGGAGCAGGTCTGTGAA<br>GAGCAATGGGCACCCCAACAGAACGGCGACGGGATCTGTAC                                                                                                                                                                                                                                                                                                                                                                                                                                                                                                                                                                                                   |

|                      |   |      |                      |                                                                                                                                                                                                                                                                                                                                                                                                                                                                                                                                                                                                                                                                                                                                                                                                                                                                                                                                                                                                                                                                                                                                                                                                                                                                                                                                                                                                                                                                                                                                                                                                                                                                                                                                                                                                                                                                                                                                                                                                                                                                                                                                                                                                                                                                                                                                                                                                                                                       |
|----------------------|---|------|----------------------|-------------------------------------------------------------------------------------------------------------------------------------------------------------------------------------------------------------------------------------------------------------------------------------------------------------------------------------------------------------------------------------------------------------------------------------------------------------------------------------------------------------------------------------------------------------------------------------------------------------------------------------------------------------------------------------------------------------------------------------------------------------------------------------------------------------------------------------------------------------------------------------------------------------------------------------------------------------------------------------------------------------------------------------------------------------------------------------------------------------------------------------------------------------------------------------------------------------------------------------------------------------------------------------------------------------------------------------------------------------------------------------------------------------------------------------------------------------------------------------------------------------------------------------------------------------------------------------------------------------------------------------------------------------------------------------------------------------------------------------------------------------------------------------------------------------------------------------------------------------------------------------------------------------------------------------------------------------------------------------------------------------------------------------------------------------------------------------------------------------------------------------------------------------------------------------------------------------------------------------------------------------------------------------------------------------------------------------------------------------------------------------------------------------------------------------------------------|
| ENSMUST00000043296.1 | 1 | 218  | ENSMUSG00000037544.1 | <p>CTTATTTGAGGTGGTGAAGCTGGGGAAGAGTGCATGCAGTCCGTC<br/> GTGGATGACTGGATGAAATATATAAAACAGACAGGGACATCCGCAC<br/> TTCTGGATTTAATCAACTTTTTTATCCAGTGTTCAGGATGTCGAGG<br/> TACGGTCAGAATAGAGATGTTTCGAAAATATGCAGAACGCAGAAATA<br/> ATCAGAAAAATGACTGAAGAATTTGATGAGGACAGTGGTGACTACC<br/> CCCTTACAATGCCTGGTCCCTCAGTGGAAAAAATTCGTTCCAATTT<br/> TTGTGAATTTATTTGGAGTCTGATTCGACAGTGTCAATATAGCATA<br/> ATTTATGATGAATAATATGATGGACACCGTAATTTCCCTTTTGACTG<br/> GTTTGTGACTCCCAAGTCAGAGCTTTTAGGCATACAAGTACCCT<br/> TGCTGCAATGAAGCTGATGACTGCTGCTGGTGAATGTTGCTTTAAAC<br/> AGTTTATAGTGTGTCGCTGCCACGCCTAGCGGGTTTACCGCCCTCCC<br/> TCCTCCCCCTCGCCCTCCCGCTCCCAACCCTTTGGCTTCCAACAA<br/> TTTAAATGTCGCACAGAACCAACCTATCGCAAGCCTCGTTTCGAGGG<br/> GAAGGGCGGGAGCTTCCGGAAGTGTGGCAAAAGTCCCTCCAATC<br/> AGCGGCTGGCAGCGGAAATTTTCAGTTCCTGTGA<b>AGGGT</b>CGGTCCGG<br/> GAGTTCCTTCTCGGATCGGTGGAGTTTTCTGTGTTGCGACATTTG<br/> TGTGGATCCAGAAACTGCTTCAGG</p>                                                                                                                                                                                                                                                                                                                                                                                                                                                                                                                                                                                                                                                                                                                                                                                                                                                                                                                                                                                                                                                                                                                                                                                                                                                                                                                                                                                                                                                                                                                                                 |
| ENSMUST00000045457.1 | 1 | 16   | ENSMUSG00000037677.1 | <p>AGTACCTTCCCAGCA<b>AGGGT</b>TACTGGGCATTTCTGGACCGTAACCC<br/> TCGCTTGCA</p>                                                                                                                                                                                                                                                                                                                                                                                                                                                                                                                                                                                                                                                                                                                                                                                                                                                                                                                                                                                                                                                                                                                                                                                                                                                                                                                                                                                                                                                                                                                                                                                                                                                                                                                                                                                                                                                                                                                                                                                                                                                                                                                                                                                                                                                                                                                                                                           |
| ENSMUST00000047074.1 | 1 | 145  | ENSMUSG00000037777.1 | <p>ACTCCTGCTCCCGGGCCCTTCTTTGTTTTCTCCCTGGGTTTGT<br/> TCTTCTACCTGGCTTGGCTGTTTCTTCAATTCACTTTGGAGAAGAGC<br/> CCGTCTCCAATCGCCCAAGTTACACAAGTGCCTGGGGCTCTCTGGA<br/> CTTGTG<b>AGGGT</b>CCCTGCTACTCTGACTGCCCTGGTATCAAGTTACT<br/> GAAAGTCTACACCAGGCAGTCCCTCATATTTACATACAAATAACTC<br/> CTGGGTTTGGCTTTTATGTCACTATTTGGGTCCTGCAAGAGGCTTGCC<br/> AGAGCGTCCCTAATCCAATCAGGAGGCCTTTGAAAGGATGCTGTGT<br/> TGAGCGGTCAGAAGGATGTTTCGTCGCTATTAAGTGTGGCCACACAA<br/> AATTTTTCGCATGTTTCGGTCTGAGTTTTTTTTTTTTTTAAATCT<br/> TCGGAGTTAAAAAAGTGAAGGATGATGTACAGCTGCTCAGTTGCCT<br/> TCGCAGCTTGGAGATGCTGAGGAAACGCTGCAGCCCTGGTGAAG<br/> AAGATCTGACTAGGACGGGTTTGGATCCATACCAGGCTGGTGTGG<br/> ATTGGGGCTGGTGTGGACGGCTTACTCTAAACCCTGCTTAAAGGAA<br/> TTCTTGGAGCCCTCGGAAAGTACTCCCAACCAGTCTGGTGGAA<br/> ATGGCTTTGCCACACAGTAAGATGCCATCACAGGGGACACTGACAA<br/> GTATCTCGGGCCACAGGACCTTAAGGAGTAGGTGATGACTCCCTG<br/> CCAGCAGAAGGTTACGTAGGCTTCAGTCTTGGAGCCCGTTCTGCCA<br/> GCCTCCGCTCCTTCAGTTCGGATAGGCTTACACCTTGAACAGAAG<br/> CTCCTACGCAAGGGACAGCATGATGATAGAGGAACTTCTGGTACCA<br/> TCCAAAGAGCAGCACCTGACGTTACAGAGGGAGTTGATTCTGACT<br/> CCCTCAGACACTACAGTTGGGCAGCGGACAGCTTAGATAATGTGAA<br/> CCTGGTCTCAAGCCCGGTGCATTTCTGGGTTTCTGGTTAGCTTTATG<br/> CGGTAAGGCTTGCCGCTCCCTGCCATGCGTTTCAGATCTAGCCGGGA<br/> TGGCCAGCGCCGACCATGACCTGTTCGTGTTTTCTCCCTCCCAAAC<br/> GCAGGCTCAAGTCCACCCACGCCCAAGTTCTCGGTGTGCGTTCCT<br/> GGGGGACCAGCAGCACTGTGATGAAGCCAAGGCCGTGGATATCCCC<br/> CACATGGACATCGAGGCGCTCAAGAAGCTTAACAAAAACAAGAAGT<br/> TGGTCAAGAAAGCTGGGTAGGTGGGCTCACTAGGGCTGAACACAA<br/> CCATGACCCCTGCCAGGAGTGGCAGCACACATTTGGGCTTCACAA<br/> CCAGTTAGAAAAATGCCCCACAGGCTGGTCTGATACTCCCTCTCGC<br/> CAGTGTGTGCACTGACTCATAGCCAGCTATTGGTTTGGGTTTCAA<br/> GCTTTTTCAGTTAACAACCTATCGAGGGAGGGGTCACAAGTGTCTC<br/> CCACGTGTTAGCCTCCATGGTAGCCCTGTCTCCGCATACATTTTG<br/> GGAATAGTTATCCACTGTGAGCTAGGCAGTTGTGATGCTGCTTTT<br/> ATAGATAGAAGGTTTCTCCATCTGTCTTAAGATTGGAGTAATACT<br/> GAGTCTTACTGATGTTGCCAGCCTGGGGTCTAAGGTTATCCCTTAG<br/> AAGTGTCTCAGGACTGTGCCCTGTCACTGAGCTGTGTTCTCAGGTGA<br/> CATTATGGTTCCAGGCCCTGCTTGGGCTTCTCAGATAGCTGGCCT<br/> TGGTCCACCTTTGACAGATAATGAGACAGCTTTTTTCTTAAGATTT<br/> TATTTTATGATATATGAGCAGGCTGATGAGAGCCTCAGATCCCATTA<br/> CAGGTGGCTGTGAGCCACCATGTGGCTGCTGGAAATTGAACCTCAGG<br/> ACCTCTGGAAGGCAGCACTCTTAAGTGTGAGCCATCTCTCCAGTC<br/> CATAGTTTGGAGCAATTTAAATGCAGGCTTACAGTGAATCCAAGGG<br/> GTGGGGCCATCACAGCCCTCAGTTCTATGAGCACACACAGGGAT<br/> CGTGCCCGGAGCCCTGGGAAAGAGGGAGGGAGGGAGGG<b>AGGGT</b>C<br/> GTGGCCGGCCGCC</p> |
| ENSMUST00000049974.1 | 1 | 1051 | ENSMUSG00000037805.1 | <p>CAAGACTGGTCAGCGGCTCCCTAACCCCGGGCTCGCAGGCTGATGA<br/> CCCTGGGAGACAGGGGCTCGAGGGGCCGAACTAGCCGCGCCGG<br/> GGCTGAGCCCGAGAGGCCAGGCTGGGGGAGGGAGGCCCGGAGGGA<br/> GGGAGTGAAGGAAGGAGGAGGGCTGGCGAGCTGGAGCCCGCAGGCG<br/> GCGGGAGCCCGGGCAGCCTCGTGGGAGTGCCTCTCCCGCAGA</p>                                                                                                                                                                                                                                                                                                                                                                                                                                                                                                                                                                                                                                                                                                                                                                                                                                                                                                                                                                                                                                                                                                                                                                                                                                                                                                                                                                                                                                                                                                                                                                                                                                                                                                                                                                                                                                                                                                                                                                                                                                                                                                                                                                                         |
| ENSMUST00000042891.1 | 1 | 41   | ENSMUSG00000038146.1 | <p>CGTGCCCGGAGCCCTGGGAAAGAGGGAGGGAGGGAGGG<b>AGGGT</b>C<br/> GTGGCCGGCCGCC</p>                                                                                                                                                                                                                                                                                                                                                                                                                                                                                                                                                                                                                                                                                                                                                                                                                                                                                                                                                                                                                                                                                                                                                                                                                                                                                                                                                                                                                                                                                                                                                                                                                                                                                                                                                                                                                                                                                                                                                                                                                                                                                                                                                                                                                                                                                                                                                                         |
| ENSMUST00000046893.1 | 1 | 622  | ENSMUSG00000038390.1 | <p>CAAGACTGGTCAGCGGCTCCCTAACCCCGGGCTCGCAGGCTGATGA<br/> CCCTGGGAGACAGGGGCTCGAGGGGCCGAACTAGCCGCGCCGG<br/> GGCTGAGCCCGAGAGGCCAGGCTGGGGGAGGGAGGCCCGGAGGGA<br/> GGGAGTGAAGGAAGGAGGAGGGCTGGCGAGCTGGAGCCCGCAGGCG<br/> GCGGGAGCCCGGGCAGCCTCGTGGGAGTGCCTCTCCCGCAGA</p>                                                                                                                                                                                                                                                                                                                                                                                                                                                                                                                                                                                                                                                                                                                                                                                                                                                                                                                                                                                                                                                                                                                                                                                                                                                                                                                                                                                                                                                                                                                                                                                                                                                                                                                                                                                                                                                                                                                                                                                                                                                                                                                                                                                         |

|                      |   |        |                      |                                                                                                                                                                                                                                                                                                                                                                                                                                                                                                                                                                                                                                                                                                                                                                                                                                                                                                                                                                                                                                                                                                                                                                                                                                                                                                                                                                                                                                                                                                                                                    |
|----------------------|---|--------|----------------------|----------------------------------------------------------------------------------------------------------------------------------------------------------------------------------------------------------------------------------------------------------------------------------------------------------------------------------------------------------------------------------------------------------------------------------------------------------------------------------------------------------------------------------------------------------------------------------------------------------------------------------------------------------------------------------------------------------------------------------------------------------------------------------------------------------------------------------------------------------------------------------------------------------------------------------------------------------------------------------------------------------------------------------------------------------------------------------------------------------------------------------------------------------------------------------------------------------------------------------------------------------------------------------------------------------------------------------------------------------------------------------------------------------------------------------------------------------------------------------------------------------------------------------------------------|
| ENSMUST00000038681.1 | 1 | 93     | ENSMUSG00000038503.1 | GCAGGACGCAGCCAGAGCTTGTCCAGGTGACTGAGCTCCACCCCTG<br>TGCACCAAGACACCCACCCACCCCCACTGGTCAAGCCTCGCTGG<br>AGAAAGAGACCGGGAAGTCCCAGCATGAGAATCAGAGCTGCCAGC<br>CAGCTTCATAGATGGGGAAGCAGCCTGCTTGCCCTCCCCATCAATT<br>ACAGGGATAACTGAGAAAAAGCCCCACCCAATATGGAGGCTGAGGA<br>CTACCGCCTCTATTAATTCCCTGCCTTCTCCCTGCCCCGCCACC<br>TGGCCTTAGCTGGGTCACTCATGCAATGCTGAGAAGTAAGCAAGAC<br>TTGGGGTCAGCTTGCTGGCTACCAGGCAAGGACTGTGGGCATCAT<br>GGGGTGTGTGTGAGCGGGGCTCC <b>AGGGT</b> GAGACCTAGCCCCGCC<br>CCCAGGAATCAAGGGGGTGGGGGTGGGGCCGAGGATAGA<br>CGGATGAGGTCGGACAGGAGGAACCAGAACGAGGCGGGGTGCGGT<br>AGGCTACGGACTCCTCGGAGCGGAGCCATGGGACTTGAGTCCGC<br><b>AGGGT</b> GGGACGGGGTCAAGTACTGGGTTT <b>AGTT</b> TGCGCAGAACA<br>CGCTTAGGGACTGGATTGGAAGCCGGGGCGGGTGGGGCGGAGG<br>CCCCGGCTCCGGACTCCGCACGCTGTCTGCGCAGGCTCATTTGTC<br>CTTACGCTGGGCAGTCCGTTACGCTAGGCTGCTAAC<br>AAAA <b>TGAGAGGGCTGGACGGGAGAGT</b> GAGTGTGGGGCGGAGCT <b>AG</b><br><b>GGT</b> CTGTGTTCAACGCGCCGAGTCCCGGCTTGGTCCAGGAAAA<br>GCTGCTTGCCTAGGGGCATCCCGCTGCCTGGTGAAAGGAACCGC<br>AGCACAC <b>AGGGT</b> GGGAGGGCTTCCGATTTTAG                                                                                                                                                                                                                                                                                                                                                                                                                                                                                                         |
| ENSMUST00000052687.1 | 2 | 44,145 | ENSMUSG00000038525.1 | ACACTGGCTGCCTGGTGCCTCCGCGAGGGGGCTGTGCCGAGCCGCA<br>CATCCGCGGGCTCCATGTTCAACGAGCTGCGGTTCAAGCTGAGCCC<br>CCCCGAGCTCGCGCGGGGCTGTGCGTCCGGCTTCCGGGAGCGT<br>CCGGATGTGGACGGCCGAGCTCTGCTTCGACTGAATGCAGATAAGC<br>TGCAGAGAA <b>TGGGGTTGACCCAAGAGGC</b> TCAGAGGCAGGAGGTGCT<br>GCAGCAGGTACTCCACCTGCAGGTTCGTGAGGAGGGGGCGGAGCTG<br>AAGCTGCTCAGCCAAGCTTCCCTCGAAACATGTCCTAGCTGCTGC<br>CTATACTTGGACCCAGACCCCAACACTGTGACAGAGCCACAGC<br>CAAGAATGAGTCAGAAT <b>TGGCCCTACAGCCCTTTGGATCCTGCAG</b><br>GATACCC <b>TAGTGGCTAAACCTAGCCAGT</b> GATCAGGGAGGCAAG<br>ACTTCCACCTCCAGGTGCTCTGGAGAGGCAC <b>TACAGGTTCTGCC</b><br>TGTGGCTGGGTGGTGGTGGTGGCTGCTTATAGACCCCTCTCTG<br>AGATCCAAGCCAGTCCATCCCTGGTGTGCTGGCAGCAA <b>ACA</b><br><b>AGGT</b> AGCTGCCTGGA <b>ACTAGAATGGGGTTGAA</b> TGTCCCGAGACT<br>CCAGGGAGTCTGTTTATTTATTTCTCCCTCCAACATGTGACCATCCC<br>CCATCTGAGTCATGAGTCTTCCCTTAAATCTTAGTCTGTGTCTT<br>TCCCGGGCACCC <b>CAGATCAGCCACAGTGGGCAAGCTGTCTTG</b><br>GCTCTCTTCAAGTATATCTGTCCCTAGCTCTCTTAGAGTACAGC<br>AGGCCAACCTGCTGTCCATACTA<br>GCGCGCAG <b>AGGGT</b> TCAGGGGTACGGCGCGGTATCTTGTGGCGGGA<br>AAAGCTGTTT <b>TGAGGCG</b>                                                                                                                                                                                                                                                                                                                                                                                                                                                            |
| ENSMUST00000060173.1 | 1 | 597    | ENSMUSG00000038605.1 | ATTTCCCAAGGCCGGCGGAGCCCACGGCTTCCAGGACTTGCCTGC<br>TTGACACA <b>ACTTTTCTTCTCTCTGCTCTGAGAGCCTCCTCCCGCG</b><br>GCTTCTTCTTAAGCTCGTCGCAG <b>AGGGT</b> CACGTGACGTCCCAC<br>GTAACGGAGGACGGAGCGCTCCCGTATTGCCATTTGCAGGCG<br>CCTAA <b>AGGTGCCCCGGCGGTGACGTATACTCGCGCGCGGGCT</b><br>GAGGAAGGGAAAGGGCCAGCCTCCGAGCCATCGGGTCTCCACGCGC<br>GCGTCTT <b>TGCCCGCACGAGTGTGCGGA</b><br>ATTTCCCAAGGCCGGCGGAGCCCACGGCTTCCAGGACTTGCCTGC<br>TTGACACA <b>ACTTTTCTTCTCTCTGCTCTGAGAGCCTCCTCCCGCG</b><br>GCTTCTTCTTAAGCTCGTCGCAG <b>AGGGT</b> CACGTGACGTCCCAC<br>GTAACGGAGGACGGAGCGCTCCCGTATTGCCATTTGCAGGCG<br>CCTAA <b>AGGTGCCCCGGCGGTGACGTATA</b><br>AAGCTTAAATATGACTACCTCGT <b>TGTTGTTGAAAAATATGTTTAGGA</b><br>GAGGAAGCTGATGATTTGATA <b>ACTTGTATTAATAACCAATTACA</b><br>TTTATAGGACCTTTTAA <b>ACTCGGTGCAATTAACCGTGTCTTTT</b><br>ACATTTTCCGAAGCGACCTGACATTTAGAAAGACTCCAAT <b>TGCC</b><br>TCGTTAAATCGCGAAATTAACAGCGTGCCTACGCCAGGCTCAGCG<br>TTGTGGATGTGTGTGATGGTGT <b>TTTCCGTGACTCCCCACATCA</b><br>GTCTTTGGGGTGGTCTGCGAAGGTATTTGATTTGTTGTGAGCA<br>GAGATATCTCATTAA <b>TGTAGGTAGTTAAACAGATTTAATCCGTA</b> TT<br>CGTTCTCTCTCTCCCCCTCCCTCTCCCCCTCTCCCCCTCTT<br>TCTCCCTGGGTGTT <b>TTTTTCTCTCCCCCTCTTTTTTCTGCCCTC</b><br>TCTCACTCCCTGGCGCTCTCTCGCTTAGCTCTCTCTCGCACTCG<br>CTCTCTCTCGCTCTCACCTCGCTCTGCGT <b>CTGTCCGGGAGGAGT</b><br>ACCCAGAAGCCAATAGGATGCGGGTCTCTAATGGATGCAATGAT<br>GGTGAAAAGACGGGGCAAATATGAAACACTCATTTGGAGGGAA<br>TAAATCACCGAAA <b>ACTGTTTATGAACTGGCATCCCTTCTCGAAAT</b><br>GTAAGCGAGGACCTTT <b>TAAAGTGGCGGTATATTTTGTGTTGGGG</b><br>GTGGGGGTGGGGGAGGGCGAGCGAGCCGGCTGCCATGCAGGC |
| ENSMUST00000049343.1 | 1 | 8      | ENSMUSG00000038644.1 |                                                                                                                                                                                                                                                                                                                                                                                                                                                                                                                                                                                                                                                                                                                                                                                                                                                                                                                                                                                                                                                                                                                                                                                                                                                                                                                                                                                                                                                                                                                                                    |
| ENSMUST00000049666.1 | 1 | 119    | ENSMUSG00000038683.1 |                                                                                                                                                                                                                                                                                                                                                                                                                                                                                                                                                                                                                                                                                                                                                                                                                                                                                                                                                                                                                                                                                                                                                                                                                                                                                                                                                                                                                                                                                                                                                    |
| ENSMUST00000046951.1 | 1 | 119    | ENSMUSG00000038683.1 |                                                                                                                                                                                                                                                                                                                                                                                                                                                                                                                                                                                                                                                                                                                                                                                                                                                                                                                                                                                                                                                                                                                                                                                                                                                                                                                                                                                                                                                                                                                                                    |
| ENSMUST00000052650.1 | 1 | 924    | ENSMUSG00000038721.1 |                                                                                                                                                                                                                                                                                                                                                                                                                                                                                                                                                                                                                                                                                                                                                                                                                                                                                                                                                                                                                                                                                                                                                                                                                                                                                                                                                                                                                                                                                                                                                    |

|                      |   |           |                      |                                                                                                                                                                                                                                                                                                                                                                                                                                                                                                                                                                                                                                                                                                                                                                                                                                                                                                                                                                                                                                                                                                                                                                                                                                                                                                                                                                                                                                          |
|----------------------|---|-----------|----------------------|------------------------------------------------------------------------------------------------------------------------------------------------------------------------------------------------------------------------------------------------------------------------------------------------------------------------------------------------------------------------------------------------------------------------------------------------------------------------------------------------------------------------------------------------------------------------------------------------------------------------------------------------------------------------------------------------------------------------------------------------------------------------------------------------------------------------------------------------------------------------------------------------------------------------------------------------------------------------------------------------------------------------------------------------------------------------------------------------------------------------------------------------------------------------------------------------------------------------------------------------------------------------------------------------------------------------------------------------------------------------------------------------------------------------------------------|
| ENSMUST0000049352.1  | 1 | 194       | ENSMUSG00000038721.1 | <p>TTAGACTTTTGCAGGCTTCGCTCTTCTATTCCTGGAAATCACAAA<br/> AGTGTGGCGGCTTTGAGATCTTCTCGTCTTTTCTTTCTTTCCCT<br/> CCTTCCTTCTTTTTTTTCCCCTCCTCCCTTTTCCCTCCTTTCCCTG<br/> GCG<b>AGGGT</b>GACTAGGAGCCGGCGAATCCGCGTTTTTTTTCTCTCT<br/> CTCTCCCTCCCTTTTCCCCTCCCCACCCCTCCCCAACAGCCCCC<br/> GAGCTCCGGCCCCGCGAGCGGAGCCAGGAGCTGGGCCTCCACAGC<br/> AGCGTCCCCCGCCGCGCCAGTCCCCGCTAGTGGTAGTATCTCGTAA<br/> TAGCTTCTGTGTGTGAGCTACCGTGGATCTCCTTCCCTTCTCTTGG<br/> GGTCCGGGGGAAAAAAGAAAAGGATTTAAGCAAGGACTCCCT<br/> CGTCTGCG<b>AGGGT</b>GATCGACTGCGGCCGTCGAGAACCCCTCGCC<br/> CCCCCCCCATGTA AAAAAGCCTCCTGTGCAATGGTCTGTTTCCCT<br/> TGAACGTGCTTCTTTGTAATGACCGAGGTACCGATTTCTGCTAAGT<br/> TTTTCCCAACAACATGAAACTGCCTATTCACGCCGTAATCTTTCTG<br/> TCTCCCGTCACTTCTCTCTTTCTCTCGCTCTCTTCTCTCACCG<br/> CGTCCCCATCTTTCTCGCAACCCCTCTCCCCGCTGCCCCCTCCCTA<br/> GCTGGCTTCTCTCTTGTCTCTTTTCTCTCTGTCGCCCCACC<br/> CCCACCCCTTTGGTTTGACAATTTGTCTTAAGTTTTCTCAAAA<br/> GAGATTACTTTAGTTAGCATGCGCGCTGTGAGCATTGTTAAAAGTG<br/> TTCTTAGGTTTACTGTGAAGAGAATGTATCCTGTATCTGTGAATTG<br/> CTTTATGGGGGGAGGGAGGGCTAATTATATATTTGTGTTGTTCCCT<br/> TATACTTTGTCTGTGCTGCGCCTGAAAAGGGCGGAAGATTTAC<br/> AATAAAGTTTACAAGCGAGAACCCGAGACTGGCCCGGGCGCCGCT<br/> CCTCATTCGCTCCTAGGCGCCTTGCAGGGCTGGGGGTGGGGGGAG<br/> CTGGTTCAGCAGGCTCCTGGGCTGGCCTAGGCTAGGTCGCTGAGAG<br/> AGGGGGCGGGGGCGGGGGCTGGAAGCAGGTGGTGCAGTCCCTGGG<br/> CCCAGGGGCGCAGGGGTGAGGGAGCGGCTGAACTGATTGGAGG<br/> AGAGAGGATCGAGGGAGGGGAGCCAAGAGAAACCCCTCCCTTGC</p> |
| ENSMUST0000043775.1  | 1 | 664       | ENSMUSG00000038773.1 | <p>GTGGAAGCGAGCAGTGCCTGGAGTTCGGGAGATGTGTGATGTGTGT<br/> GAGACAACCCTCTTCAATATCCACTGGGTCTGTGCGAAATGTGGAT<br/> TTGGGGTCTGCCTTGACTGTTACCGGCTCAGGAAAAGCCGTCCAAG<br/> GAGTGAGACAGAAGAAATGGGGGATGAGGAAGTTTCTCCTGGCTG<br/> AAGTGTGCAAAGGGGAGTCCCACGAAACAGAAAACCTCATGCCCA<br/> CCCAGATCATCCCTGGCACAGCGCTTTACAATATTTGAGACAGTGGT<br/> ACACGCTGCCCGGGGAAAGTGGGGGATTAAGCTAACTGCCCTTGT<br/> ATAAGTTCGCAAAGCAAATCTGTTTGGAGACTGCTGTACCAGT<br/> GGATATCACAGCTTCCCAGTGAACCCCTAGTGCTCTTCTGGAAA<br/> CGAAACTACCTTCTCAAGCGGAGCGGAGCTGCAGCGTACAAAT<br/> CCAGAGCCAGACCAAGTTCCCAAAGGTGCTGGCACTGACGGCAGAT<br/> CTGAGGAGCCCTAAAAGCAGAAGTTCGCGTCAAATAGCAATAG<br/> TGAATAAAAGCCATCAGGCCCCCGTGCCTGGACACAGCCCTCTCT<br/> TCTCTGCTCTGCATTGGTTGGCCGACTTAGCAACTCAGAAGCGGA<br/> AAGAAGAAACGAAAGATGC<b>AGGGT</b>CCCTGCGGTGCGTCAATAA<br/> GGAGTCTCATTCACCTTTGGGCTGGACTCATTCAACTCTACTGCA<br/> AAAGTCTCTCCATTG</p>                                                                                                                                                                                                                                                                                                                                                                                                                                                                                                                                                               |
| ENSMUST0000045372.1  | 1 | 132       | ENSMUSG00000038871.1 | <p>GAGCGTTGATGCCGGCTGTAGCGATGAATCCTCAGTGGCGTCTGCA<br/> GCACGGCGTTACCGAGGACCGGCTGCTACTGGTAGTTTTCTTGCAG<br/> ATATACTGCTGTTCTTGAACATCATCCCATGAGAACCC<b>AGGGT</b>A<br/> GTTACGCCACCAGC</p>                                                                                                                                                                                                                                                                                                                                                                                                                                                                                                                                                                                                                                                                                                                                                                                                                                                                                                                                                                                                                                                                                                                                                                                                                                                   |
| ENSMUST0000047558.1  | 1 | 29        | ENSMUSG00000038943.1 | <p>CCGTCTCCGTCCCGCGCGTGGCAAGTGG<b>AGGGT</b>CTCGATTCTGGA<br/> CAGCTTGGAGCGTCCACC</p>                                                                                                                                                                                                                                                                                                                                                                                                                                                                                                                                                                                                                                                                                                                                                                                                                                                                                                                                                                                                                                                                                                                                                                                                                                                                                                                                                      |
| ENSMUST00000035301.1 | 1 | 40        | ENSMUSG00000039105.1 | <p>AGAGTCTGGGTGGTGGATCAGGTGATCCGAGGGGCTTCGG<b>AGGGT</b>G<br/> TTTTGAGCAGTTGACTTAGGCCGTTCTCTCAGCCCAAAGTCCCTCA<br/> GCA</p>                                                                                                                                                                                                                                                                                                                                                                                                                                                                                                                                                                                                                                                                                                                                                                                                                                                                                                                                                                                                                                                                                                                                                                                                                                                                                                                |
| ENSMUST00000048657.1 | 1 | 53        | ENSMUSG00000039367.1 | <p>GTTCCGGCTCCTCTGTGAGGAGCTCAAGTCACTCTTAGACTACCTAC<br/> CTAGGG<b>AGGGT</b>GGAGCAGAAGAGTCAGCAATCCGAGTTGGCTTTGT<br/> CACCTATAATAAAGTGCTCCACTTCTACAATGTGAAAAGCTCCTTG<br/> GCTCAGCCACAGATGATGGTTGTATCTGATGTAGCTGACATGTTTG<br/> TGCCACTGCTGGATGGCTTCTTAGTCAATGTGAGTGTCTCGGGC<br/> TGTTATCACACAGCTTATTTGATCAGATTCAGAAAATGTTTGCAGAT<br/> ACAAGAGAGACAGAGACAGTGTGCTCCAGTTATCCAGGCCGGGA<br/> TGGAAGCTCTGAAGGCTGCTGAGTGTGCAGGAAAGCTGTTCTGTT<br/> CCACACATCCTTGCCCATTCAGAGGCCCCAGGGAAGCTGAAGAA<br/> AGA</p>                                                                                                                                                                                                                                                                                                                                                                                                                                                                                                                                                                                                                                                                                                                                                                                                                                                                                                                                         |
| ENSMUST00000035672.1 | 2 | 1712,3211 | ENSMUSG00000039457.1 | <p>CACCTGCGCCCGCCCGCCGCTTTCGGTGGCGCGGGTCCGTGCGC<br/> GCGTTCCAGTCCCTCTGTGCCAAGCGCCACCATGCACTCGCTCTT<br/> CAGGAAGAGAAACAAGGCAATACAGCCCAACGGTGCAGACCGG<br/> AGCATCTCCAACAAGGAATCTCAGATCTGATTGAGCAGCTGCAGA<br/> AGAAATGCAGACAGGTGGAAAGGAACATTTGTTGACACCGAGCCAA<br/> GATGCAGAGCGACTTGGCCCGGATGCAAGAGGGGCGAGCTCCCTGAG<br/> CACCGGGACGCGCCCTGCAGAACGTGTCTGACTCAGAAAAGCTGC</p>                                                                                                                                                                                                                                                                                                                                                                                                                                                                                                                                                                                                                                                                                                                                                                                                                                                                                                                                                                                                                                                                   |



|                     |   |                       |                      |                                                                                                                                                                                                                                                                                                                                                                                                                                                                                                                                                                                                                                                                                                                                                                                                                                                                                                                                                                                                                                                                                                                                                                                                                                                                                                                                                                                                                      |
|---------------------|---|-----------------------|----------------------|----------------------------------------------------------------------------------------------------------------------------------------------------------------------------------------------------------------------------------------------------------------------------------------------------------------------------------------------------------------------------------------------------------------------------------------------------------------------------------------------------------------------------------------------------------------------------------------------------------------------------------------------------------------------------------------------------------------------------------------------------------------------------------------------------------------------------------------------------------------------------------------------------------------------------------------------------------------------------------------------------------------------------------------------------------------------------------------------------------------------------------------------------------------------------------------------------------------------------------------------------------------------------------------------------------------------------------------------------------------------------------------------------------------------|
| ENSMUST0000044911.1 | 1 | 274                   | ENSMUSG00000039615.1 | <p>TGTACGTGCTGGAGGCAGATTTCGGCCATCGCCAAGCACATGAAGCA<br/> CCCACAGGGGGACATGATCGCCGAGGACATCCGCCAGCTGAAAAGAG<br/> CGCGTGACCAACCTGCGGGGAAACACAAGCAGATGTACAGCCTGG<br/> CAGTGAAAGAGGCCGACCCGAGAGTCAACTGGGACACACTGGTGGA<br/> CGAGAAGCTGGACAAGCTGAGCAGCCAGAGCTTTGGGACTGACCTT<br/> CCTCTGGTGGATAGCCAGGTGGAGCAACACAACATCTTCCACAATG<br/> AAGTCAAAGCCATCGGGCCCCACCTGGCCAAGGACAAGGAGCAGAA<br/> CAGTGAACTCCAAGCCAAGTATCAGAAGTTGCTGACAGCATCACAG<br/> GCACGGCAGCAGCACCTGAGCTCGCTGCAGGATTACATGCAGCGCT<br/> GCACCAATGAGCTGTAAGCTGGCTGGACCAGCAAGCCAAGGGCCGCAT<br/> GCAGTATGACTGGAGCGACCCGAACCTCGACTACCCAGCCGCGCCG<br/> CGCCAGTACGAGAAATTCATCAACCGGAACCTGGAGGCCAAAAGAAG<br/> AAAGAATCAACAACTGCACACTGAAGGTGACCAACTGCTGACAGC<br/> TGAGCACCCAGGGAGGAACCTCCATTTAGGCACACATGGAGGCTGTG<br/> CATGCTGAGTGGAAGGAGTACCTGAACCTGCTCATCTGTGAGGAGA<br/> GGCCGACGGCAGCTCCTCCCGATTCCCGAGGAAGCCCTCGAGAGC<br/> GGTCTGATCTGCGGGCCTCTTTCTACCTCAATTCGCGCTTCCCTA<br/> CCGGCGGTCCAGACGTTCCAGGCTGTGCGGTGAGCCGCTGTGTGC<br/> CCTGGTGGTGCCTAGGACCCGGCCCTAGTGACCGGCCCTCGGAAG<br/> GCCACTTCTCAATGACCGCTGCCAGTTCCGCCAGCTTGGGGCCGG<br/> AGGGCGGGGCTTGAGCGCCGATGGCGGAGCCTTGGTCTGAGAG<b>AGG</b><br/> <b>GT</b>AGGTCTCGGTTACTGTAGGGCGGGCCTGTAGAGCGGGCGGAA<br/> GCTTCTCAGAGCTAAGGGAACCTGCTCAATCCACGAGGCTCCGCT<br/> TTGCTCAGCTGTCCCATGCCAGCTCCGCCACACCGGAAGTTCC<br/> GGTGGCGGATCGCCGACCGGGCGAGCTGATCGCTGCGCGGGCTGC<br/> GAGATCTAGGTGGCCGGCGGGAGCCCAAGCCGTGCCGCGGGCC<br/> CC</p> |
| ENSMUST0000044268.1 | 1 | 81                    | ENSMUSG00000039660.1 | <p>AACTGGCAGGCGCGCGGTGGGCCCTGGAAACATGGCGGAGCGCCCGA<br/> GGAAGCGTCCGTGTGGTCCGGGTGAACATGGCCAA<b>AGGGT</b>TGAATG<br/> GCGAAAAATGGAAACAGCAGAGTAAGTAAAAAGCTGAGGCCGGGTTG<br/> GGCAAGCGCACTGAGCCCTCCCTTTCACAAACAGCTAATGGCC<br/> GACGAGCCCTCTTTGGGTCTCAGTGTATCCAAGTGAGTGGTGGCAG<br/> CCTCTCCAGAGCCTAGGCTAGCCAGCGAGAAGGAACCTCTCCCTCC<br/> CATGTCAAGTCCCTTCCCTCCAATAATTTCTCCAGAAAAAGAGGAGA<br/> AAAAGAAGTGAAGGACCTCAAGATA</p>                                                                                                                                                                                                                                                                                                                                                                                                                                                                                                                                                                                                                                                                                                                                                                                                                                                                                                                                                                                                  |
| ENSMUST0000048724.1 | 4 | 295,301,11<br>12,1360 | ENSMUSG00000039807.1 | <p>CCTGTGCCACAGCAAAGGCACGGGAAAAATGGAGAGGGGGCAGCTG<br/> GATCTGGTAGACGAGACAAAGCTTTTATTTGCTACTAGTACTGAAGG<br/> GACGACAAAAGGCATCATGTTAAACACAGTCAAGACTGGAGATGCC<br/> ACCACCACCTTCATCAGAAGTGGGAGAGAAGGGGACAGCCTTACCTT<br/> GCACCAGTATGAGCGCGACGAAGGCTTCATGATGGGTGCTTGCC<br/> TAAAAACATCCCTCCAGGTTGGGGCAGAAGCCAGTGAATGCACT<br/> GTTTTTGCTGCAGCTGAAC<b>AGGGT</b><b>AGGGT</b>GTTGTACAGAAGGAT<br/> TTGCTGAAAGTGAGATTTTGCTTACAAGCTCCAAGGAAGGAGAAAG<br/> TGGAGAATGTGCTGTGGCTGAGTCAAGACAGAGTAGCAGGTTCC<br/> TTGGCTGCTCATACAGTTCAAGCTGAAGCCAATGTGAACAGTATTA<br/> CAACAGAGGAAAAAGACGATGCAGTAACAGTGCAGGCTCTGAGGA<br/> AAAGTGTGGTGGATCTGCATGTACAGTTGAGGGGACGGCTACTTTT<br/> ATTGGTGAAGTTGAAAGTATGAGCTGTTACAAGTGTGGAACGG<br/> AAATAAGAGCAGGATCTCTGAGCAGTGAAGATGTTGATGGGTCCCA<br/> AGAAAATAGGATACAAGTTGGTCTTAAAAAAGAAACAGAAAGCACT<br/> GTGACATGTACTGAAACCAAAGGAAGAAATGATAACTTTCATTTGCT<br/> TGGTAACTAGAGTAGAAACCCAAGAGCAACGCTGTAGTTACAGGTGC<br/> AGATGTGGTCCAAGTAAATGCTGCTAAACCCCAAGAGGCAAATGCC<br/> AATCAAGGAGATGGTTCTGGAACCTGATGGTGCAGAAGGTGAGAGTG<br/> CAGTACCAGCACAGGCATTACTGAAGAAGATGGGGAAGCATCAGC<br/> AAATTGCACAGGCTCAGAAGACAACAGGGAAGGCTGTGCCATAAGT<br/> TCTGAAACAGAAGAAAGTGCAGAGAGTGCCATGGACAGCACAGAAG</p>                                                                                                                                                                                                                      |
| ENSMUST0000049149.1 | 2 | 205,399               | ENSMUSG00000040249.1 | <p>GCCAGTGCACAGGAGGCGGAAACGGGGGAGCCCTAGTGTCCCA<br/> TCAGGCCCCCTACCAGGCACCCCATCGGGTCCACGCCCCCCACCC<br/> CCCACCCCGCTCCTCCCAATTGTGCATTTTGCAGCCAGAGGCGG<br/> CTCCGAGATGGGGCTGTGAGCTTCGCCCTGGGAGGGGGAGAGGAGC<br/> GAGGAGTAAAGCAGGGGTGA<b>AGGGT</b>TGCAATTTGGGGCAGGGGGC<br/> GCACCCGCTCAGCAGGCCCTTCCCAGGGGGCTCGAACTGTACCA<br/> TTTCCCTATGCCCTGGTTCGCTTTGCTTAAGGAAAGGATAAGAA<br/> TAGAAGAGTCGGGGAGAGGAAGATAAAGGGGGACCCCCAATTTGGG<br/> GGGGCGAGGACAGAAGTAACAGGACCAG<b>AGGGT</b>GGGGCTGCTG<br/> TTTGATCGGCCACACC</p>                                                                                                                                                                                                                                                                                                                                                                                                                                                                                                                                                                                                                                                                                                                                                                                                                                                                                                          |
| ENSMUST0000062861.1 | 1 | 6                     | ENSMUSG00000040472.1 | <p>GTGCA<b>AGGGT</b>CCACGGGACGGACGGACGGGGGGGGGGCAGTCTGCTC<br/> TCTATATGCGCGGCTGTGCTCGGCCCTGACGGGTGGGGCTTCGG<br/> AAAGATCCGTGGGACGGAGGCCGTGGTTGTGGTGAGCGCTTCCTC<br/> CTGACCTCACAGTGCAGCCGCCGCCCTTTTAACTCACGGGGA</p>                                                                                                                                                                                                                                                                                                                                                                                                                                                                                                                                                                                                                                                                                                                                                                                                                                                                                                                                                                                                                                                                                                                                                                                                   |

|                      |   |         |                      |                                                                                                                                                                                                                                                                                                                                                                                                                                                                                                                                                                                                                                                                                                                                                                                                                                                                                                                                                                                                                                                                                                                                                                                                                                                                                                                                                                                                                                                                                                                                                                                                                                                                                                                                                                                                     |
|----------------------|---|---------|----------------------|-----------------------------------------------------------------------------------------------------------------------------------------------------------------------------------------------------------------------------------------------------------------------------------------------------------------------------------------------------------------------------------------------------------------------------------------------------------------------------------------------------------------------------------------------------------------------------------------------------------------------------------------------------------------------------------------------------------------------------------------------------------------------------------------------------------------------------------------------------------------------------------------------------------------------------------------------------------------------------------------------------------------------------------------------------------------------------------------------------------------------------------------------------------------------------------------------------------------------------------------------------------------------------------------------------------------------------------------------------------------------------------------------------------------------------------------------------------------------------------------------------------------------------------------------------------------------------------------------------------------------------------------------------------------------------------------------------------------------------------------------------------------------------------------------------|
| ENSMUST0000002393.1  | 1 | 6       | ENSMUSG0000004072.1  | TCCTTATCCTGGGCCTGCTGGCAGCTTCCGGGAAACACCTGGGGGG<br>CGGGGCCGTGTGGCGGGGTCTGTGATTGACATCTCTTTCGGCAG<br>ATTGAACGGGCTGCCTCCGGACCCCTCCCTATCGCCAACGCTGA<br>GTGCA <b>AGGGT</b> CCACGGGACGGACGGACGGCGGGCGGGCTGCTC<br>TCTATATGCGCGGCGTGTGGCTCGGCCCTGACGGGTGGGGTTCGG<br>AAAGATCCGTGGGACGGAGGCCGTGGTTGTGGTGAGCGCTTCCCTC<br>CTGACCTCACAGTGCAGCCGCCGGCCCTTTTAACCTCACGGGGA<br>TCCTTATCCTGGGCCTGCTGGCAGCTTCCGGGAAACACCTGGGGGG<br>CGGGGCCGTGTGGCGGGGTCTGTGATTGACATCTCTTTCGGCAG<br>ATTGAACGGGCTGCCTCCGGACCCCTCCCTATCGCCAACGCTGAG<br>CCGAAACCATG                                                                                                                                                                                                                                                                                                                                                                                                                                                                                                                                                                                                                                                                                                                                                                                                                                                                                                                                                                                                                                                                                                                                                                                                                                                                         |
| ENSMUST00000045141.1 | 1 | 11      | ENSMUSG0000004072.1  | AGGGGGTGCA <b>AGGGT</b> CCACGGGACGGACGGACGGCGGGCGGGC<br>TGCTCTTATATGCGCGGCGTGTGGCTCGGCCCTGACGGGTGGGGC<br>TTCGGAAAGATCCGTGGGACGGAGGCCGTGGTTGTGATTGAACGG<br>GCTGCCTCCGGACCCCTCCCTATCGCCAACGCTGAGCCGAAACCA<br>TG                                                                                                                                                                                                                                                                                                                                                                                                                                                                                                                                                                                                                                                                                                                                                                                                                                                                                                                                                                                                                                                                                                                                                                                                                                                                                                                                                                                                                                                                                                                                                                                       |
| ENSMUST00000049228.1 | 1 | 16      | ENSMUSG0000004076.1  | GGCGGTGTGGTTGATT <b>AGGGT</b> GCTGCTTTCAATCGTGTGGCCTTTG<br>GGAACCCCGGTAGCCACTGCCCGCTCCTTCTGTCTCCGCC                                                                                                                                                                                                                                                                                                                                                                                                                                                                                                                                                                                                                                                                                                                                                                                                                                                                                                                                                                                                                                                                                                                                                                                                                                                                                                                                                                                                                                                                                                                                                                                                                                                                                                 |
| ENSMUST00000045035.1 | 1 | 29      | ENSMUSG00000040564.1 | CATGGCCCTCCTGAGAGATCCTTAGATCC <b>AGGGT</b> GCCCTCCAACC<br>AGG                                                                                                                                                                                                                                                                                                                                                                                                                                                                                                                                                                                                                                                                                                                                                                                                                                                                                                                                                                                                                                                                                                                                                                                                                                                                                                                                                                                                                                                                                                                                                                                                                                                                                                                                       |
| ENSMUST00000046478.1 | 2 | 148,171 | ENSMUSG00000040644.1 | CTTCATCCTTCAGGTACCAGCCATCTGGGCAGAACTTAAGCTGTGG<br>AGACTGAGACCACCCCTCCAAGGATCTCGTCTGAGCATCTCTAGTG<br>ACCTTCTCTGCATTAACCTGCAGTGTACGGATATTTTAGCTCCA<br>AGTCTTGGC <b>AGGGT</b> GGGGCACCTATCTGAGGC <b>AGGGT</b> TTGGTGCC<br>CCTCCCACTGACCCTACATCCCTGGCTGCCGTGCTGTACTTCA<br>GG                                                                                                                                                                                                                                                                                                                                                                                                                                                                                                                                                                                                                                                                                                                                                                                                                                                                                                                                                                                                                                                                                                                                                                                                                                                                                                                                                                                                                                                                                                                            |
| ENSMUST00000040428.1 | 1 | 52      | ENSMUSG00000040904.1 | TCGCTCTGCGCCGCGCAAGTCCCCAAATCCAGCTCCTGTCTTAGCA<br>TTTCC <b>AGGGT</b> TCCCTCTCCGGCTTCTGTG                                                                                                                                                                                                                                                                                                                                                                                                                                                                                                                                                                                                                                                                                                                                                                                                                                                                                                                                                                                                                                                                                                                                                                                                                                                                                                                                                                                                                                                                                                                                                                                                                                                                                                            |
| ENSMUST00000047013.1 | 1 | 187     | ENSMUSG00000041012.1 | GCAGTCCACTGCCACCGGTGCCAGCGATCCCGTTCCCGGGTCTCC<br>GAGCAGACCAGAGTGCCTCGCCGAGGTGTTGGGACACTTGCCTGA<br>CCTGACCCCTGGAGATCACCCGGGTTCGCCCGCTCCCATCATCCGC<br>GATTCCTGGCCCGCATCTGAGCCAGGGAACCTATTGGGTGGG<br>GGT <b>AGGGT</b> CCTCGGGGACCCGGCCAGCTCCCGGGGCGAGC                                                                                                                                                                                                                                                                                                                                                                                                                                                                                                                                                                                                                                                                                                                                                                                                                                                                                                                                                                                                                                                                                                                                                                                                                                                                                                                                                                                                                                                                                                                                                 |
| ENSMUST00000035875.1 | 1 | 41      | ENSMUSG00000041431.1 | GGAACGGCTGTAGTGTTAGTGTGGATAGCCAGAGGTT <b>AGGGT</b> G<br>TCTTCTCGAATCGGGGAACCTCTGATTTTGGAGGAGCC                                                                                                                                                                                                                                                                                                                                                                                                                                                                                                                                                                                                                                                                                                                                                                                                                                                                                                                                                                                                                                                                                                                                                                                                                                                                                                                                                                                                                                                                                                                                                                                                                                                                                                      |
| ENSMUST00000047629.1 | 1 | 939     | ENSMUSG00000041438.1 | AGGTGGATTCCTCAGTCTCTGCTGGCACCTGCGGGTACCCACGTC<br>GCAGCTGGTTCCTTAGACTACATTAGCGTGTGTTGATGTCAAATCAG<br>GGAGCATAAATTCGTAAGATGGTTTTAGATAGGCAACACCTGGGAGT<br>GACTAAGTCCAGGTGCATAGTGTGGGTGTTGCCCTCTTGTCCGAC<br>GGCACTGTATAAGTGTGGACTCTGTTGGAAAGGTGCAGTTGTGGG<br>ACTCTGCTACTGGGACACTCGTTAAGAGTCACTCTGTCGCAATGTC<br>TGATGTGAGTCTATTGCTGTTGCTGATCAAGAAGACAGTTTTTGTG<br>GTGGGACCCGCCGAGGGCACGGTATTCATTTCCAGCTGGTGTCCA<br>TGACTTCCAACAGCAGTGAAGAGAGTGGGTGCCGACGAAACCGTT<br>CCAGCATCACACTCATGACGTGCGTGTGTGGCCACAGCCCAACA<br>GCCCTGATCTCAGGAGGCCACCGACACCCACCTGGTTATTCGGCTC<br>TCATGGAGAGAGTGGAGGTAAAGAATTACGATGCTGCTCTCCGAAA<br>GATCACGTTCCCCATCGCGCTCTCATTTCCTGTTCAAAAAGAGG<br>CAGCTTCTCCTTTTCCAGTTCGCGCATCACTTGAAGTGTGGAGAC<br>TAGGATCCACATCTGCAACAGGCAAGAACGGAGATACTCTTCCACT<br>CTCTAAAACGCAGATCATCTCCTGCACCTCAAGACAAAGGGCCCT<br>GAGAACATTATCTGAGCTGTGTCTCCCGTGTGGAAGCTGGATAG<br>CCTATTCTACAGCTCTCGCTTTTTTCTCTATCGATTGAAATATGA<br>ACGCGATAACATAAGCCTCCAAAGAGTTTTCCAAATTGCCATCATTC<br>CTGCGCTCTGCCCTTCATATTCTGTTTTTCTGAAGATTCAACAAAGC<br>TCCTTGTGGCATCCAATCA <b>AGGGT</b> CTCTGCATATTGTTTCATCTGTC<br>GGAAGGAAGCTTCAAGCACTTGCATACTTTCAGCCGCGCAGTCAAGT<br>AACAAATCGGCGCGGTGCGCCCGAGGGGGCGTGTGCGCACAGACT<br>TCTCCATGAATAACCGCTGAGTTTCGTGCTGAGTAGAGGGGTGT<br>ACGCGTGTCTCCCGTGTACACACTGCTTTAGGCGCACCCGGT<br>GTCGCGCGGCGGGGAGAAAGGAGGGCAAGAGCCGGTGGAAAGGCA<br>ATAGCCTAAAGAGCAAATACTCCCGCCGTCGGAGCCCTTCCCTTC<br>TCCCGCCCGCCGCTCCCTTGGAAAGACTTGGAGGCCAAGGCCGC<br>AAGAGGCGC <b>AGGGT</b> GGGGCTGGGCGGAGCTGGCGGTCCCTTAGAAA<br>CCTGGGACGAGGCTTTACCGGGGGGACCTGCGCGCGCCCGGTA<br>CGTCCGAAGCATGGGGCTCGAGGCTTTTTCAGGGCGAGTAGGTAG<br>CGGTTGGTTAATGATTTAACCCTGGCTTGGGACGTTGAAGGCTGC<br>GATCTGATCTCTGGCTCCTCCCATTCCTGGAGCGCCCCAGCCG<br>GAGGAACAAATCTGCCCTCCTGTGCTGTGGCGTCTGCTGGAG<br>CTGCTTTCCCTTTGGGGGACCCCTGGTTGCTGTGGCCCTCTGAT |
| ENSMUST00000041997.1 | 1 | 286     | ENSMUSG00000041598.1 |                                                                                                                                                                                                                                                                                                                                                                                                                                                                                                                                                                                                                                                                                                                                                                                                                                                                                                                                                                                                                                                                                                                                                                                                                                                                                                                                                                                                                                                                                                                                                                                                                                                                                                                                                                                                     |

|                     |   |                       |                      |                                                                                                                                                                                                                                                                                                                                                                                                                                                                                                                                                                                                                                                                                                                                                                                                                                                                                                                                                                                                                                                                                                                                                                                                                                                                                                                                                                                                                 |
|---------------------|---|-----------------------|----------------------|-----------------------------------------------------------------------------------------------------------------------------------------------------------------------------------------------------------------------------------------------------------------------------------------------------------------------------------------------------------------------------------------------------------------------------------------------------------------------------------------------------------------------------------------------------------------------------------------------------------------------------------------------------------------------------------------------------------------------------------------------------------------------------------------------------------------------------------------------------------------------------------------------------------------------------------------------------------------------------------------------------------------------------------------------------------------------------------------------------------------------------------------------------------------------------------------------------------------------------------------------------------------------------------------------------------------------------------------------------------------------------------------------------------------|
| ENSMUST0000048046.1 | 1 | 71                    | ENSMUSG00000041732.1 | TGCCCTGTCTACCCCTTTCGATTGCTGGACTTCAGATCTGACCCCAT<br>ACCTGCCTGTGCTTGGGAGTGCACAGCTCCCCCGCAGCCAGCAC<br>G<br>CTGACAAGGAGATCTGTGGAGTTTTTCTCCAAGTGAACCAATCCCC<br>TGTGTCTTGCTCAGACTGTGGTT <b>AGGGT</b> GGGCACATCCACTCTGC<br>CATCTTAAACACACAGAAACCAACATCAGTGTCCAGTAGCTTAC<br>TA                                                                                                                                                                                                                                                                                                                                                                                                                                                                                                                                                                                                                                                                                                                                                                                                                                                                                                                                                                                                                                                                                                                                          |
| ENSMUST0000038945.1 | 1 | 132                   | ENSMUSG00000041801.1 | GAGCGGTGGAACATGTAAGGGCACATCCCGCCAGCAGCCGCCAGC<br>TCGCAGACGAGCGCAGGGGAGCGGGCGTGCAGGGCGGCAGGCAGC<br>GGGCACCGGGTAGAGGCTCGGGGAGGTCGAAGCGGCGCGC <b>AGGGT</b><br>CCAAGCCGGCGGAGAGAGTAGCATCGCACAGCCTCCCGGTACC<br>CGTGTCTGCGAGGCGGCCCGGGCCGAGGCTCGACCCGACAGGGA<br>GCAAGGCCAACAGCTCCAGGGCGCAGAAGCCGGCGCTGTAGAGC<br>CGGGACAGCCGGGATCGCCCGAGCCTCCAGAGCTGTGGAACTCG<br>GGGTGCC                                                                                                                                                                                                                                                                                                                                                                                                                                                                                                                                                                                                                                                                                                                                                                                                                                                                                                                                                                                                                                               |
| ENSMUST0000048966.1 | 4 | 426,585,18<br>74,2505 | ENSMUSG00000041852.1 | TGAGAGGAGAACTGCCCCCTTTCCTTTTCTTCCCGGTTTCTCGC<br>TTTCCCTTCCCTCCCTGCCTCCCGGGGGGTTGTTTTCTGCAGCC<br>TGCATGCTGTGGGCTGTCAAGGGGTTTGGGGCAAGTGCAGGGGA<br>GGATGCAGCTGCAAAGGAGGCTGCTGGCTGCTGTGTGTGTGTG<br>AACAGTATGCAGTCGTTTCGGGAGCAAAGCAGTTACCACGGAAC<br>AGCAGAGCTACCCACAGGAGGTGCACAGCTCATCCGCATAGAAGA<br>GTTACAGCCCTCGCCAGGCCAGATGTTCCAGAATTTTGGGGAGCA<br>GGTGGTGGTAGTAGTGGCACTGGCAGCAGCAGTAGCGGTCGACGAG<br>GAACAGCTGTGCAGCGGAGCAATGGCTAGTGAGACCTCTGGCCA<br>TCAAGGCTATC <b>AGGGT</b> TTTCAGGAAAGAAGCTGGAGATTTTACTAC<br>ATGGCAGGCAACAAGACACAGTGGCAGCAGGAACCCACAGCCTC<br>CTCAGCGAAGCCCTTCTGGGCTGTACAGAGCTATGGACCTCCCA<br>GGGGAGCAGCTTGGCAATCAGTATCGGAGT <b>AGGGT</b> CATGTGAGC<br>CAATTTCAAGCACAGCCTTGCCTTGGTGGTGTGTCTCATTTATC<br>AGCAGGATTACACAGGGCCCTTCTCTCCTGGGAGTGTCTCAGTACA<br>ACAGCAGGCCCTTAGCCAACAACAGCAGCAGCAGCAGCAGCAGCAA<br>CAGCAGCAGCAGCAACAGCAGCAGCAAGTACAGCAGTTGAGAC<br>AACAGCTTTACCAATCCCATCAGCCTTGCACAAACCACTGGACA<br>GCCAGCCTTGGCTCATCGCATCTACAACCAATGCAGCGGCTCA<br>ACTCTGCCATCTTCTGTGGTTATCAGTTAAGAGTAGGTACGTTTG<br>GACAGCACTACCAGTCTTCTGCTTCCCTCCTTCTCCTCCTCCT<br>CCTTCTCCACAGCGTTTCAGTCACTGGCAAAGCTATGATGGC<br>CCTGAGTCGGCAACTTTGGATTCTGGGATCCAGGATCAATC<br>AGGTCAGCTACATAGAGTCCACCAGGGTACATTCACGCATTC<br>CACTGCTCTCTTGGGCTCTGTCTTTAACATCTGGGTTAACTGGA<br>TCGTGCAAAAC <b>AGGGT</b> TAACAGGGCGAGAAAACAGCTGGACACGTTGC<br>TGAGCCAGACTGTACGTACTAGTTCTTAGAAAACCGCTTCTGGAT<br>CTCTGTGAGCCAAACAAGCTCGTCCGTCTGA |
| ENSMUST0000036160.1 | 1 | 149                   | ENSMUSG00000042275.1 | GAGATGCCCTCTTAATGAGT <b>AGGGT</b> TAGAAAAGGAAGAGCATTCCAGG<br>CGGGAGGAATCAAGGCCAGGTCTGAGCAGAGAGAGGCAAGGTGGC<br>ACAGCCCCCGAACCTGAGCAGGCACC<br>GGTAGGTGTCCCACCCGCTTGTGAAGACACCCGAAATTCGTCAA<br>CGAGCGATCCCTCCGCGCTCCGGAACAGCCGCGCTGGTCTGCA<br>ACCTATAAAGTAGTGCACTTTCTCTCATGGGGCTTTAGGACGAT<br>CTCTAACGCCACAGTTACCCCGGAGCAGCGGAG <b>AGGGT</b> TGGG<br>GCGGGCGAGGGCGTCACTGAGAGGCGGTTTGGTGGCGCTGCGGTAG<br>GATCACGTGACCACAGTGGGAGGATACGCGGTGTGCTGCGTCCCTG<br>GCCGAGGCTATAAAGGGCGGTTTAGGGCGTGCAGCCGCCATTTCT<br>GCTTGTCTGTGCGGGTTAAGTTGTGTCTCGGGTGTCCCTTCC<br>TCTTCCCTCCCGCAGGGCTTGGCGCCACCATGGCGTATTAGAGGC<br>AGCAGTGCCCTGCGGCAGCGTTGGCCTTTCAGCGCGCGGAGCAGCA<br>CCAGGCTCTGCAGCGCAACCCCAACCGGCTAAGCCATGGCG                                                                                                                                                                                                                                                                                                                                                                                                                                                                                                                                                                                                                                                                                                               |
| ENSMUST0000046532.1 | 1 | 20                    | ENSMUSG00000042367.1 | GAGATGCCCTCTTAATGAGT <b>AGGGT</b> TAGAAAAGGAAGAGCATTCCAGG<br>CGGGAGGAATCAAGGCCAGGTCTGAGCAGAGAGAGGCAAGGTGGC<br>ACAGCCCCCGAACCTGAGCAGGCACC                                                                                                                                                                                                                                                                                                                                                                                                                                                                                                                                                                                                                                                                                                                                                                                                                                                                                                                                                                                                                                                                                                                                                                                                                                                                        |
| ENSMUST0000044156.1 | 1 | 176                   | ENSMUSG00000042406.1 | GGTAGGTGTCCCACCCGCTTGTGAAGACACCCGAAATTCGTCAA<br>CGAGCGATCCCTCCGCGCTCCGGAACAGCCGCGCTGGTCTGCA<br>ACCTATAAAGTAGTGCACTTTCTCTCATGGGGCTTTAGGACGAT<br>CTCTAACGCCACAGTTACCCCGGAGCAGCGGAG <b>AGGGT</b> TGGG<br>GCGGGCGAGGGCGTCACTGAGAGGCGGTTTGGTGGCGCTGCGGTAG<br>GATCACGTGACCACAGTGGGAGGATACGCGGTGTGCTGCGTCCCTG<br>GCCGAGGCTATAAAGGGCGGTTTAGGGCGTGCAGCCGCCATTTCT<br>GCTTGTCTGTGCGGGTTAAGTTGTGTCTCGGGTGTCCCTTCC<br>TCTTCCCTCCCGCAGGGCTTGGCGCCACCATGGCGTATTAGAGGC<br>AGCAGTGCCCTGCGGCAGCGTTGGCCTTTCAGCGCGCGGAGCAGCA<br>CCAGGCTCTGCAGCGCAACCCCAACCGGCTAAGCCATGGCG                                                                                                                                                                                                                                                                                                                                                                                                                                                                                                                                                                                                                                                                                                                                                                                                                                                           |
| ENSMUST0000030630.1 | 1 | 102                   | ENSMUSG00000042446.1 | AAGACGAAGACACAGAGATGGATTCCCCAGCCAGCAGCGGCGAGGG<br>AGGAAGAAGTCTGTGGTACTGTGGAACCCAGAAGTCTTATTCAAG<br>GAGCCTTGCA <b>AGGGT</b> GCTCAGTGTCTGGAATGACACTGAAGTATAT<br>GTATGGGGTAAATGCCTGGAAGAAGTGGGTTCACTGGAAAAATGCC<br>AAGGATGAACAAGGAGATCTGAAGTGGGGGGAGGTGAACTTGCCCT<br>CTGCTAGTCCGTGTCTGACTCCTTAGGAAGTGTCAAGACCAATGC<br>CCTCTCTCAAGAATCCTCAGAGCAAGGCTGTAAAGCCCGCTCTGTG<br>AAACTGAAGGAAGATATTCTGTCTGCACTTTTCTGAGTTGAGTT<br>TGGGCTTATGCCAGTTTATCCAAGAGGTGCGGAGACCAATGGTGA<br>AAAGTATGACCCAGACAGTATCTTATACCTGTGCTTGGAAATTCAG<br>CAGTACCTATTTGAAAATGGTAGAATAGATAACATTTTACGGAGC<br>CCTATTCAGATTTATGATTTGAACCTACCAAACTCTTGAATAATG<br>GGAACCTACAATACTTCTAATGGTTACATGTTCTCCCGATTGAA                                                                                                                                                                                                                                                                                                                                                                                                                                                                                                                                                                                                                                                                                                                                          |

|                     |   |     |                     |                                                                                                                                                                                                                                                                                                                                                                                                                                                                                                                                                                                                                                                                                                                                                                                                    |
|---------------------|---|-----|---------------------|----------------------------------------------------------------------------------------------------------------------------------------------------------------------------------------------------------------------------------------------------------------------------------------------------------------------------------------------------------------------------------------------------------------------------------------------------------------------------------------------------------------------------------------------------------------------------------------------------------------------------------------------------------------------------------------------------------------------------------------------------------------------------------------------------|
|                     |   |     |                     | GAAGAGCAT                                                                                                                                                                                                                                                                                                                                                                                                                                                                                                                                                                                                                                                                                                                                                                                          |
| ENSMUST0000057427.1 | 1 | 197 | ENSMUSG0000042590.1 | CACATTGGCTGTAGAGGAACCAGTGTGAAGAGTGGCGTTTCTTGCA<br>TAGCCATGGCTTTAAAATTCAAAAACCGTGGAGTGCCTGGCGTCA<br>GCAGTGGCCAGAGAACTGAGTTAAAGAACGGAGCTCTGCAGAGTT<br>AAAACAAAAGCCTTAAAGCCACGTGATGATACGAGTCCCGTATCCCT<br>GAATTACATCCA <b>AGGGT</b> CCCTAAGCCATTGTCTTCATTGACTCCTC<br>TTCAGGCAAATCCAATTTTGAGAATACAACTTTTGGGTCTTCAA<br>GAGTGGCTAGCCTCGTCAGCCCTTGCTGTAAACATCTGTTATCAGA<br>ATCCCATATCTATGTGTGGCAGAACATTATGTTATATTAATGGAC<br>TAACATTACAAATTGCCCTTACCTTGGACCAATATATCCAGAACTT<br>GGGTGTAAAATCTCTTCTATTTCATCACACGACCCTGCCTA                                                                                                                                                                                                                                                                                   |
| ENSMUST0000042141.1 | 1 | 73  | ENSMUSG0000042699.1 | GCCGTCTCGTGGAGGTTGGCGCTGCGAACTCGCCTAAGAAGGCT<br>GTGCTCTCGGGCACGGAAAAGCGGAG <b>AGGGT</b> GTGAAGAAGACACC<br>TGAATC                                                                                                                                                                                                                                                                                                                                                                                                                                                                                                                                                                                                                                                                                   |
| ENSMUST0000049668.1 | 1 | 248 | ENSMUSG0000042936.1 | AACTCAGCTGCCGACCACCAGGCCAAGCCTCTGGCTTGCCAGGCA<br>GAAC <b>TGCCT</b> TCAGTGCAGCTGCAGCCTTCTTGGAAGGCCACTGC<br>CCATGTTGCAGGCCAGCCTGGAGCCTCTGCCACACTGGCAAACCT<br>TCCCCGGGGCTCCACTCGATCACGTATGGCTCCATCAGGAGAACCCT<br>GGCCCTCTTCTCTAGAACCTCGGGCCCTCCTAGGGAACGTAGGG<br>CACCTGCAAGGGACAAAA <b>AGGGT</b> CCTCCAAAAGAGCGC                                                                                                                                                                                                                                                                                                                                                                                                                                                                                      |
| ENSMUST0000050897.1 | 1 | 2   | ENSMUSG0000043065.1 | <b>CAGGGT</b> CAGTTTATGTTCCCGGTGAACCTAGCGCGTTTGGCTCCAC<br>TGGGAGGTAGCAAGACATATTTCTAAGCAAACGATCAAAAGTTAAG<br>GCAAGGAAGTGCCTGATGTGGAGGTTGGTGTGCAAGTTTCTTTGG<br>AGACTTCTAGAGGCTTATGACAGGCGCGCCATTTGGCCCTTTGGGT<br>GAGAACTGCAGAGCCCACGCCAGTACCGCCCTTGGGTGCCTCGG<br>AGGAGCTCGCCGGATGTACGCAAAGGCGTGGGGCGGAGCTCTGGT<br>AACCCAGGCAACGGCCCGAAGCCACTTCCCGCTTCCCGCTGGC<br>GGGCTCTGTGGTCTGGAGGCTGAACTTTTAGTCGGGGCGGAGGCA<br>CAGTCGGCCAGCGGCAAG                                                                                                                                                                                                                                                                                                                                                                 |
| ENSMUST0000058150.1 | 1 | 36  | ENSMUSG0000043165.1 | TCACCTCCTTCCCTCACTCATCTTCCCTGGTGTCT <b>AGGGT</b> AACCC<br>TTCTCTTAAACAAG                                                                                                                                                                                                                                                                                                                                                                                                                                                                                                                                                                                                                                                                                                                           |
| ENSMUST0000062888.1 | 1 | 12  | ENSMUSG0000043848.1 | GAGGGCTTCGG <b>AGGGT</b> GTTTGGAGCTTGACTTAGGCCGTTCTCT<br>CGGCCAAAGTCCCTCAGCA                                                                                                                                                                                                                                                                                                                                                                                                                                                                                                                                                                                                                                                                                                                       |
| ENSMUST0000055995.1 | 1 | 19  | ENSMUSG0000044123.1 | GCCTGGGGTCTGTGATTGCT <b>AGGGT</b> GGATCTTCGGTTTGTCTCAGAA<br>CCGTGTGGTTCGAGA                                                                                                                                                                                                                                                                                                                                                                                                                                                                                                                                                                                                                                                                                                                        |
| ENSMUST0000050516.1 | 1 | 34  | ENSMUSG0000044475.1 | GCCTTTCATACGGCCGGCGGGCGGAGCCTCC <b>AGGGT</b> CTCTTCT<br>ACGCCTCCAGTTAGTCTTGGCAGGACTTTCCTGGAACGTCATTTGT<br>C                                                                                                                                                                                                                                                                                                                                                                                                                                                                                                                                                                                                                                                                                        |
| ENSMUST0000061392.1 | 1 | 4   | ENSMUSG0000044539.1 | GCG <b>AGGGT</b> ATCTGGGGTCTGTCTTGAATTTGGACCGCTTGACCTG<br>TGAGTCCCTGTGGCTCTTCGGCCATTCTGATGTGAAC                                                                                                                                                                                                                                                                                                                                                                                                                                                                                                                                                                                                                                                                                                    |
| ENSMUST0000053864.1 | 1 | 41  | ENSMUSG0000044573.1 | AGTGCATGCGCCTCGTCCCGACGCGGTTTCTGGGCGCC <b>AGGGT</b><br>TGCACCGAAC                                                                                                                                                                                                                                                                                                                                                                                                                                                                                                                                                                                                                                                                                                                                  |
| ENSMUST0000058733.1 | 1 | 609 | ENSMUSG0000044600.1 | TTTCCGGTTTGACGGACGCCTTGGGTGTAAGGATGATCGGAGACAT<br>ACTGCTGTTTCGGGGACGCTACTGATGAACGCGGGGCTGTGCTCAA<br>CTTTAAACTGGAAAAGAAGGACACACAAGGCTTTGGGAAGAATC<br>GAAGGAACCCAGCACAGGGAGACAACTCCGAGAGTTTACTAAG<br>CCTGAGGTATTTCCGGATCTTCACTCGACTGTGGAATGTGTTTCTG<br>ATGCTCTGCATGATCGTGACTGTTTCGGCTCTTGAGTCCCTCGGGA<br>ACCCAGAGATCACCTGCTGGACATCAAGGCTCTATTTCTGTTTCTG<br>ATGACTTCAAGAATCTTCTCAATGGAAAACCAGGGACCTTCCAGA<br>AGGCCAAGCTCATTTGGGTGGAGAATGTCATTTCCAGCTCCCT<br>GACCCTCGTCAGCCACAGTGACAAAGTCAGACTTATTAGGAGAAA<br>GACCTAGGCTCTTACCTTGTGCTGGCATTTCTATCTTCTCTGGCCC<br>AGCTTCTCCAGAAACCTGACCTGGGCTATTTCTGGTTGAATTGAT<br>GGTGATGTTTGGTTTGAATTTGGGTGCTTTGCTGTTTTTTTGT<br>TTTTTTGAGAC <b>AGGGT</b> TTTTTCTGGTTAGCCCTGGCTATCTGGAAC<br>TCACACACCAGACGGGCTCAAACCTCATAGAGATCCGCTGTCTCT<br>GCCTCTCAAGTGTGGGATTAAGGTGT |
| ENSMUST0000050410.1 | 1 | 122 | ENSMUSG0000044627.1 | GCCTGACGTGGGGCGGTTGGTGGTCTCCGTCGTCGGTTTCTAGTTC<br>CCTGAAGCAGCCGTTTAAACCCACCCCTGGACCTTCCGAGTTTAA<br>GCCCCCCCCACTCCGGGTGCCCCGACCTT <b>AGGGT</b> TCAGGAGGGGT<br>GAGTCAGAAATCAGCCGACTTTACCATGGCGGTACCAGTACCCGC<br>AACGCCATTCCCC                                                                                                                                                                                                                                                                                                                                                                                                                                                                                                                                                                        |
| ENSMUST0000061681.1 | 1 | 126 | ENSMUSG0000044645.1 | GGCCGCGCGCTCCGCGCCCGCAGTCTGGTTCGGCGCGCGCTCAGC<br>GGCGCGGGCGGGCCCGACGACGACGACGCGGGCGCTCGCGCTCGG<br>CTCCCCGGCCACGGGACGCGGTTCGACCCCGCGC <b>AGGGT</b> GCAGCCCC<br>CGGAGCGGGCGGGCGGGCGGAAAA                                                                                                                                                                                                                                                                                                                                                                                                                                                                                                                                                                                                             |
| ENSMUST0000058776.1 | 1 | 416 | ENSMUSG0000044980.1 | TTTTTTGTTTTTTTTTTTTTTTCTTAACCCACCTCCTTTTTTTATT<br>TTCTTCTCTTCTGATATGCAAGTGTGCTTGTGACCATAGC                                                                                                                                                                                                                                                                                                                                                                                                                                                                                                                                                                                                                                                                                                         |

|                      |   |                                |                      |                                                                                                                                                                                                                                                                                                                                                                                                                                                                                                                                                                                                                                                                                                                                                                                                                                                                                                                                                                                                                                                                                                                                                                                                                                                                                                                                                                                                                                                                                                                                                                                                                                                                                                                                                                                                                                                                                                                                                                                                                                                                                                                                      |
|----------------------|---|--------------------------------|----------------------|--------------------------------------------------------------------------------------------------------------------------------------------------------------------------------------------------------------------------------------------------------------------------------------------------------------------------------------------------------------------------------------------------------------------------------------------------------------------------------------------------------------------------------------------------------------------------------------------------------------------------------------------------------------------------------------------------------------------------------------------------------------------------------------------------------------------------------------------------------------------------------------------------------------------------------------------------------------------------------------------------------------------------------------------------------------------------------------------------------------------------------------------------------------------------------------------------------------------------------------------------------------------------------------------------------------------------------------------------------------------------------------------------------------------------------------------------------------------------------------------------------------------------------------------------------------------------------------------------------------------------------------------------------------------------------------------------------------------------------------------------------------------------------------------------------------------------------------------------------------------------------------------------------------------------------------------------------------------------------------------------------------------------------------------------------------------------------------------------------------------------------------|
|                      |   |                                |                      | CTTGGGCAATCCTACAATCAGGAGATTGCTATGCTGCTTTCCAAA<br>AAAAAGATGAAAAATGGAGGAAAAAGTAAAAAACAAAAACAAC<br>CAAAAAAAAAAATGATAAAAAGCCAGACTTTTTGTTTTGTTTTTA<br>AACCATTTTGGAAAAGAAGCGGTTTGGAAAAATAGTTCGTAAATT<br>TGGGACAAATATATTTCTAGAAGCTTTGTGTGACCTCATGGCTGTT<br>TCCAAGACTGTCAACCTGTTTCGAAGTGAACAGTTGGGACT<br>CATTTGGACCACAGTGAAGTGACAACCTTAACCCAGTCTGGGG<br>TG <b>AGGGT</b> GTGGTGTCTTCTGTGGTACTAATGCGGGTAAATGTAG<br>GGACCTGGTTTTATGCCTCCCGACCTGTCTTCATCCTCTGTTTTT<br>TTTTTTTTGTTTTGATTTGTTTTTTTTAAATGTACTTTAAGAGA<br>AAAGGAGAAGAGAATGCCAGAAAACTAAGATGGTTCAATTAATCCA<br>CTTCCTTCAGCCTTATGCCCTTGGATAGGACATCTCCATACACCG<br>GCC                                                                                                                                                                                                                                                                                                                                                                                                                                                                                                                                                                                                                                                                                                                                                                                                                                                                                                                                                                                                                                                                                                                                                                                                                                                                                                                                                                                                                                                                                                                     |
| ENSMUST00000060985.1 | 1 | 8                              | ENSMUSG00000045553.1 | GGGCTGA <b>AGGGT</b> AGCAGACGTTTCCACAGCCGCCGACCCGAGCTT<br>GAGTGTCTGCACCACCTTTCGTGGAAATCTGAGCCGGCTGTACAG<br>CTTTCCCTCCTTGTTCCTGCAGCC                                                                                                                                                                                                                                                                                                                                                                                                                                                                                                                                                                                                                                                                                                                                                                                                                                                                                                                                                                                                                                                                                                                                                                                                                                                                                                                                                                                                                                                                                                                                                                                                                                                                                                                                                                                                                                                                                                                                                                                                  |
| ENSMUST0000005258.1  | 1 | 38                             | ENSMUSG00000045671.1 | CTCCACACCACAGTTGCCACTTGGGGTGCACAGATA <b>AGGGT</b> AGGT<br>CACCAACTGATTATGCCTGTCTCTGAGCCATGCAAGAGGCTCCTAA<br>TGTGCTGGGGGGGGGAGCACATATGCATATATATAT                                                                                                                                                                                                                                                                                                                                                                                                                                                                                                                                                                                                                                                                                                                                                                                                                                                                                                                                                                                                                                                                                                                                                                                                                                                                                                                                                                                                                                                                                                                                                                                                                                                                                                                                                                                                                                                                                                                                                                                     |
| ENSMUST00000055744.1 | 1 | 19                             | ENSMUSG00000045748.1 | AGACGGTTGCGGGCGCA <b>AGGGT</b> TGGTAGTTGTGCTGTGGCCCT<br>CGCTGCCGCTTCTGCATCGTGAATCGGGGGACCTTGGCAGCCAGAC<br>CTCGTTCCCTTACAGTAGCTCTCATCTAGTCGCCACAACCTCCGCC<br>ACC                                                                                                                                                                                                                                                                                                                                                                                                                                                                                                                                                                                                                                                                                                                                                                                                                                                                                                                                                                                                                                                                                                                                                                                                                                                                                                                                                                                                                                                                                                                                                                                                                                                                                                                                                                                                                                                                                                                                                                      |
| ENSMUST00000060433.1 | 1 | 114                            | ENSMUSG00000045752.1 | GGGCGCTGAAGCCACGAAAACTGATCGCCCGAGACTCGGTTTCCC<br>AGGAACCCGAGCGAGACTGGACAGGACCAATCCCGGGGAACCTGGC<br>GGGACGCTGCGAGAAAGCGGC <b>AGGGT</b> ATTGAGGCGGTACGGACG<br>CTGGAACGCTCCTGTATCTGTGCGCGCTAGGATACCTTTAACCAC<br>CCAGCTTCGCGAGGCTCCCGTCCGGCTGTGAGTAGAGGCACTTGA<br>CACATAGTGGAGGTGGGACGGGTGTCAAGTCTGT                                                                                                                                                                                                                                                                                                                                                                                                                                                                                                                                                                                                                                                                                                                                                                                                                                                                                                                                                                                                                                                                                                                                                                                                                                                                                                                                                                                                                                                                                                                                                                                                                                                                                                                                                                                                                                     |
| ENSMUST00000060630.1 | 5 | 13,1804,23<br>15,2338,25<br>35 | ENSMUSG00000046268.1 | TGGACAGTTGGC <b>AGGGT</b> TCCTGATGCAGATGGACAGGTTTCATGATT<br>TTTCAAGCCTCCCGCTTCCCGGTGAAGCCGAGAGAGTGGCCCTCC<br>TGGTATCCCGTCTGACTGGGGAGGCGGAGAAAGTGGCCATCCCCCA<br>CATGCAACCAGACAGCCCTTTGCGAAACAATTACCAGGGGTTTCTG<br>GCTGAGCTCCGCAGAACCTACAAGTCCCGCTGAGGCACTCAAGGC<br>GAGCACAAAATCCGGAAGACATCCCGCTCCAATAGGGCTGTGCGGGA<br>GCGAGAGCGGGAGCGCCAGATGTTGTGTGCGCAACTGGCCGAGCT<br>GGCACAGGATCCTGCCCGGTGCATCCAGCTCCAACGGGACCAATC<br>CCGCACCAGCCTTGCCCTCTCGTGGCCGGAAACCTTTAAGGACTTGC<br>CACCACCCTGGTAGTCTGTGTCCACCAGGTAGCTAGACTCCCGTTG<br>TTGAGAGTTGTCAATTCAGTAGCTTTGCCCTGTTTGGGACCCCTT<br>CACGCTCTCTGGTCTACGGGAGACCATCCTGTATCGGCATTGGT<br>CACCCACCCCGCTGTGCGGCGTGTATTTGTTTTGTTAGCGTTACCC<br>GCGACTCAGTGCATGCTCCCTTCTGTGTGCTTGAATCCCGCT<br>TCTCCAGCAATCACAAACACAGCCCTTGGGCATGTGCCTGCCAGG<br>AACCATTTAGGCTGACCACCTCTGCGAGCTCAGCTCACGGATACTC<br>AGCTCCTGGAACACTCCCTACAGCTCTTGTGCCCCAGGCTGAAGA<br>ACTGCGAGGAGTGGCCAACCTGCTFCGGGTCTCATGTGGACATG<br>TTCCAGTCCCAAGGAGCAGAGCCTCACAGGAGGATGACCTCTCAAT<br>CAGACTCAGCAAGCCTCTGGACCATGACATCATCTGTATTTCAA<br>TGCCAAATGAACTGTGTTTACATACCTACCTGGCCCTTTGGGGAG<br>ATGGGTTACCTCTCCTGGGTTTTCCCTGCCCTCCTGTCATGGCTTT<br>GTATACT <b>AGGGT</b> GATGTAAAATCACAAAGAAGAACTGTGTGAG<br>GTAAGGAAAATACATTCAAAATAATATATATATATTTAAAATTA<br>GTCTTCTACTTGACTTTTAAACAATCTTGAAGAGAAGTCGAGAATG<br>TAAGTAATAATTTTATTTAAGTA <b>AGGGT</b> TTAAGGAAAGGCATGCT<br>ACCCTGAATGGCAGTCATGAGCAGAACAGATGCTGTTAAATTTAA<br>TGGAAACATAAGCTTAATATTTTAGCCATAGAAAGCTAAATTTGAA<br>TTTATCTATACCGCATAAATAATCAACCTGAGGAAAATGATTTGATT<br>TTTTAAAAGCTTAATTTCTTTATTTCTAGAAAATCAAGTGATGTAT<br>TGTCTTCCCATTGTATATATTCATTACAGTTAATCATGCAATCATTA<br>GGTGTCTACTTCTGTATACTACTAACAGTGGCCAGCTCACTAGAC<br>ACATACCTGAACAAAACAGTAAACATTTTAAAAACTTACTTTAT<br>TTGAAAATTCAGATACTTTTATATCATTTAGTCACTTTACTGCTGTA<br>AAGTTTTTACTAAGAAAAGGCAGAGAAAATCAACCTTAGCATGCTGT<br>TATAAAGTGTCCATTTATTTGCTCATTTCTCAGGATACTCTTATT<br>CCTTTCTGTATATAAGAAAACAAATCTGAAGAATCCAACCTTTTCA<br>TTCCAGAGTTCCATCTTAATTAGCATACAAGGTAGGTAAGGTTTA<br>AACAAATTTCCCTCAAAGCTGTGACTTTAGGTTGCCATCCTTGAAGT<br>TAGTTTTCCAGTTGGGTGATGCTCATCTACAGGCTCTTTGAAAATA<br>AACACAGTTTCGGAATTATAGGCTCAGGTTAAGGGAATAGTTTTACG |
| ENSMUST00000051734.1 | 4 | 8,161,1933,<br>3161            | ENSMUSG00000046700.1 |                                                                                                                                                                                                                                                                                                                                                                                                                                                                                                                                                                                                                                                                                                                                                                                                                                                                                                                                                                                                                                                                                                                                                                                                                                                                                                                                                                                                                                                                                                                                                                                                                                                                                                                                                                                                                                                                                                                                                                                                                                                                                                                                      |

|                      |   |         |                      |                                                                                                                                                                                                                                                                                                                                                                                                                                                                                                                                                                                                                                                                                                                                                                                                                                                                                                                                                                                                                                 |
|----------------------|---|---------|----------------------|---------------------------------------------------------------------------------------------------------------------------------------------------------------------------------------------------------------------------------------------------------------------------------------------------------------------------------------------------------------------------------------------------------------------------------------------------------------------------------------------------------------------------------------------------------------------------------------------------------------------------------------------------------------------------------------------------------------------------------------------------------------------------------------------------------------------------------------------------------------------------------------------------------------------------------------------------------------------------------------------------------------------------------|
| ENSMUST00000058928.1 | 1 | 1       | ENSMUSG00000046710.1 | AAAACTTTGAGTGTGAAGATGTTTGA AAAATTAATTTAGAACTATCTG<br>AATAATCTCTGGATGATGTTTGTGATATTCAGAGGAGCTGCTGAGG<br>ACACAGGCTTACTGCTTTGTGAGAATCAGTGC AAAAATAGCTCT<br><b>CAGGGT</b> CTGCACCGAAAC                                                                                                                                                                                                                                                                                                                                                                                                                                                                                                                                                                                                                                                                                                                                                                                                                                              |
| ENSMUST00000053872.1 | 1 | 239     | ENSMUSG00000046722.1 | CTCAACTCCCCCGCTGCCGAGAAGCAGCCAGGGGACCCGGAGTGG<br>CGGAGCCCCCGCCGAGTGGGGACGCCGGGAGCCGAGGATTC<br>ACATCTAAAGAAGACAGGACCTTGTGCC TGCCGACCCAGCCCTT<br>GCCAGTCCCCACCAGTCAAGACTCCGACCTTACCCGAAAGGCCA<br>CTTGTGTGGTGTCTAGGATTTCTACCTTTTCCCACCCCATCCGGTTG<br>ACTGAACCC <b>CAGGGT</b> GTTGTTACACCTGCCTGTGAGGACTGGTTGGT<br>TAGCAACAAACACGAGCCCCCTGGGGCCTCTGGCAGCGCCCTGAAG<br>CTGGAACCATCAGGGAAC                                                                                                                                                                                                                                                                                                                                                                                                                                                                                                                                                                                                                                              |
| ENSMUST00000062238.1 | 1 | 239     | ENSMUSG00000046722.1 | CTCAACTCCCCCGCTGCCGAGAAGCAGCCAGGGGACCCGGAGTGG<br>CGGAGCCCCCGCCGAGTGGGGACGCCGGGAGCCGAGGATTC<br>ACATCTAAAGAAGACAGGACCTTGTGCC TGCCGACCCAGCCCTT<br>GCCAGTCCCCACCAGTCAAGACTCCGACCTTACCCGAAAGGCCA<br>CTTGTGTGGTGTCTAGGATTTCTACCTTTTCCCACCCCATCCGGTTG<br>ACTGAACCC <b>CAGGGT</b> GTTGTTACACCTGCCTGTGAGGACTGGTTGGT<br>TAGCAACAAACACGAGCCCCCTGGGGCCTCTGGCAGCGCCCTGAAG<br>CTGGAACCATCAGGGAAC                                                                                                                                                                                                                                                                                                                                                                                                                                                                                                                                                                                                                                              |
| ENSMUST00000050490.1 | 1 | 309     | ENSMUSG00000047213.1 | GGAACTGGGGCTGAGGCGCCTGTCCGCCATTTGGGCCGAGGATC<br>GGAGGACGAGCGGGGACGAGCAGTGTGCAGGCGCGAGCTCGGGCC<br>CTTCCGCGACTCCCGAGCGTGAGCCCTCTCCCTGGAGCCTGCCAG<br>AGCGGCGGCGGGGAGGCGGAGCAGAGCTTCGCGAGGGCGGTAGT<br>CGACTGCTGTGAGTGTCTTCGGCGAGGCCAGGAGCGCGCGCGGC<br>GGCGGCGGTTCTCTCGGGTTACGGTGAAGAATGTCAGCCACTAGC<br>GTGGATCAGGAGACCTAAAGGGCAAGGAAATA <b>AAGGGT</b> GGGAAAC<br>ATGATGCACACATCTGTTGACTTTCTTAACCTTGATGTAGTCAGGAC<br>CAGAGCAGAGACCCACCTGGCTTCTAAGGCC                                                                                                                                                                                                                                                                                                                                                                                                                                                                                                                                                                                 |
| ENSMUST00000061794.1 | 1 | 318     | ENSMUSG00000047245.1 | GTGTTTGCAAAAAGGGAAAAGTACTTTGTGCTCCTTTAAGACTAG<br>GGCTGGGAGAAAGAAGAGGAGAGAGAAAGAAGGAGAGAAGTTTGG<br>AGCCCGAGGCTTAAGCCTTTCCAAAAACTAATCACAAACATCCGCG<br>CGGCCGAGGAGGAGAGCGCCTGTTTTTTCATCCCAATTCACCTTC<br>GCCGCTCTCGAGCTCCGCTTCCCCCAACTATTCTCCGCCAGATCT<br>CCGCGCAGGGCCGTGCACGCCGAGGCCCCCGCCCGGGCCCCTGCA<br>TCCCCGGCCCCGAGCGCGGCCCCACAGTCCCGCCGGGCC <b>CAGGG</b><br><b>TTGGCGGCCCGCGGGCCGCGCCCGCCAGCGCCCCG</b>                                                                                                                                                                                                                                                                                                                                                                                                                                                                                                                                                                                                                       |
| ENSMUST00000055486.1 | 1 | 4       | ENSMUSG00000047249.1 | GTC <b>CAGGGT</b> GAAGCCATGTTCC                                                                                                                                                                                                                                                                                                                                                                                                                                                                                                                                                                                                                                                                                                                                                                                                                                                                                                                                                                                                 |
| ENSMUST00000058161.1 | 1 | 42      | ENSMUSG00000047350.1 | GAGTGACGAGAGGCTTTGTCCGGTTCGGCGGCTTTCTGTG <b>CAGGGT</b><br>GTTTCGACGCGCTGGGCGGTTTGTGCTTTCATCACATTTGTTAACA<br>GGTCAAAATGCAGATCTTCGTGAAGACCTGACCGGCAAGACCATC<br>ACCCTAGAGGTGGAGCCAGTGACACCATCGAGAACGTGAAGGCCA<br>AGATCCAGGATAAAGAGGGCATCCCCCTGACCAGCAGAGGCTGAT<br>CTTTCCCGGCAAGCAGCTGGAAGATGGCCGCACCTCTCTGATTTAC<br>AACATCCAGAAGGAGTCAACCCTGCACCTGGTCTCCGCTGAGGG<br>GTGGC                                                                                                                                                                                                                                                                                                                                                                                                                                                                                                                                                                                                                                                          |
| ENSMUST00000058023.1 | 2 | 492,561 | ENSMUSG00000047614.1 | GTCTTTACGCTTCAGCTCTCTGGGTACAGTGGTTCCAGTGGTTCC<br>CAGTAGCTCCCAGACACCTAACGCCCTGGGCACCTTTGAGCATC<br>CCTGATTTGGAAAGGGATGCAGGCTTTAGAAAGCGGCTGACGGGTA<br>AAATCGCTGCATACCTTGACACAAGCCTCAAGGTGCACGGGCACAG<br>GAAGATGCGAGCCTGCCAATGAGCAGCCCTCTTCTCTCTCCTGAAT<br>GGTCTGGAGCAGGAGGCCAGAGGCTGCACAGACTCCTTACATAGC<br>CCTGCATCATCAGCCTACTGAAGGCCCTCCCCACCCCTGCTGCT<br>TTTCATTTGCCCTAATTACCAAGTCAAAGTTGCAGTCCAATTTGCTT<br>TATTTTGTAAAGTGAATGACCCCCCTACGCCCTGTAGGTCGTG<br>TCCTGTAAGCGCACCTTCCCTCCTACTTGTGAGGAACTAGGAGTG<br>GGTGAGTCTGGGCTTTGGGTTTTGAGATGG <b>CAGGGT</b> TGGCATCCAT<br>CCCTGCTGTGGTCTTGCCCTGATCTAAGTCACTCCCTCTGTGAAA<br>GGCTGGAC <b>CAGGGT</b> GGCAAGGCAGCATGAAGCACTACAGGTGCCAG<br>CCTGAGGGGGCAAAATGAGCCTCCTCCCAACTTCAGAGGGAGCT<br>GGTGGATCAGAGGGCGTTGCCCTCGTTTCAAAGGAGGCTGAGATACT<br>TCACTGGAGTATGGAGGCTTCAGAGCCAGGCTGGCCGGCATTTTA<br>AAGGGAAATGTGGGACTCTTGACTGGCCATGGCAGAAACAAGGTCA<br>GTCAAGGATGGACTGGCCTCTGGGACCTAAGAGGGCACCCACC<br>TTTTCTCCTTACTTTTCTGGTTGGTTCGGGTTTTTCGGGTTTTTTTT<br>GTTTGTGTTGTTTATTTCTGTTTTTTGCACTTAATGG |
| ENSMUST00000055747.1 | 1 | 7       | ENSMUSG00000047858.1 | GGGCTGA <b>CAGGGT</b> AGCAGACGTTTTCCACAGCCCGACCCGAGCTT<br>GAGTGTCCCCCACCCCTTTTCTGTTGAAATCTGAGCCGGCTGTACA<br>GCTTTCCTCCTTGTTCCTGCAGCC                                                                                                                                                                                                                                                                                                                                                                                                                                                                                                                                                                                                                                                                                                                                                                                                                                                                                            |

|                     |   |                                 |                     |                                                                                                                                                                                                                                                                                                                                                                                                                                                                                                                                                                                                                                                                                                                                                                                                                                                                                                                                                                                                                                                                                                                                       |
|---------------------|---|---------------------------------|---------------------|---------------------------------------------------------------------------------------------------------------------------------------------------------------------------------------------------------------------------------------------------------------------------------------------------------------------------------------------------------------------------------------------------------------------------------------------------------------------------------------------------------------------------------------------------------------------------------------------------------------------------------------------------------------------------------------------------------------------------------------------------------------------------------------------------------------------------------------------------------------------------------------------------------------------------------------------------------------------------------------------------------------------------------------------------------------------------------------------------------------------------------------|
| ENSMUST0000059828.1 | 1 | 75                              | ENSMUSG0000048354.1 | GGGCAGGGACC GCCAGGGCCGACCTCCGGGCCGGCCCTCCGCGC<br>CCCCGAGATGAGTACGGTTTCTTCTGTGG <b>AGGGT</b> ACGCAGTTAAAG<br>TCTTGATTTCTTGGATCTGGTAACATGGCAAAAGATGTGTGGTATC<br>TCTTGTAGCCGTCCACCCGTCCACAGTCAACACACTTGGGAAGCAG<br>CTTTTGCCAAAAACCTTCGGACAGTCC                                                                                                                                                                                                                                                                                                                                                                                                                                                                                                                                                                                                                                                                                                                                                                                                                                                                                           |
| ENSMUST0000054634.1 | 5 | 363,1436,1<br>551,2018,2<br>322 | ENSMUSG0000049237.1 | GGGATTTTAAAGTGGAAATCACCTTTTCAAGATTATTACCATTCT<br>GTTGTGGTACTGGAGGCTCTAAATCTCTGCATGATGTAGTTCACT<br>TGAAGTGTTTTGGTATTTCTTAGTGATTTTAGAAAAGCCTCATTTT<br>GTAAAAGTAAAATATCAGTAAATATCCCAAGATAATTTTCAGATAT<br>TTTACTGTATATGTGTAAACGATTGAACGTAAAGGGAATATAAAA<br>CAGACTTAAAGTCCAGGCTTAGGAGGGCACATAATATTTTAAATC<br>CCAACACTCAGAAACCAGAGAGGCAGGCTTCTGTGAGGTCCAGCT<br>AGTCTGCTCTACATAGCAGAGAAGGAGCAGCTGGAAC <b>TACAGGGT</b><br>TATCAAAAAGAAAGCAGTAGCTCCTCCGCCATTGTGAGTGCCAAAG<br>TGTGACACTGCTGCAGGTACAGTGGTGTTTTGGAGATGTGTTTAG<br>TTAAGAAGTAATCTTAAAGCTTTCTAATGTCCTAGCAAGTCCGTCT<br>TAGCTGAGGGAAATTTATTTGCATATAATAAAATTTTATTCCTGACC<br>GGTGGTCTCAGGGGGCTAATATTAAGTATTTATCCTTCTGTCTT<br>TTTAAATCCTAGGTAGAGAGGTAGCAAGAGTGTCAAGCAGCATATTA<br>CAAGTAATGAAAATCTTTTCAATTTGGCAATTATATATTTCTGTGAC<br>ATCTCAAAAATTCGTGGCTGTTTAGAAGAGAGTGGCTGGAGGATGA<br>AGAGATCTTCTTAAATTAAGGGAAATGGTTTCTTAACTACACA<br>GCAGAGAAGCGGGTGGCCAGCATATAGCAACATGTGGGATACATT<br>TTCACAGTGTCTTAAAGAAAGGGCAGGACACTCGGGCTAGTGCAG<br>GGGCATTTGAAGCACACTTCCATTTCTGGGATCTCGTATTTTCAATG<br>TGTGTAATAAGGACCTGAGAACACAGGCAGATGCAGCTCTTCAGTT<br>TCATCTTGAGTTTATTTTCCAAATAAAAAGGGCTGCTCTTACGGC |
| ENSMUST0000059580.1 | 1 | 612                             | ENSMUSG0000049327.1 | AAAGGGAAATGAATTTTCTTACACACACACACGCACACACACAC<br>ACATACACACACACTCACACTCCTTAGCTAATTAATCTTAAAT<br>GTTTTTAAAAAGTATATTAAGATGCCTTTTTCATGTAGTATTTAAA<br>TATCTGTACAGGTTTCCAGGTGGACTTGAACAGATGGCCTTATA<br>TTACCAAAACTTTTATATCTAGTTGTTTTTGTACCTTTTGTGATA<br>CAAGCTGAACGTTTGTGCTTCCCGCAGTGTAAAGACTCGGCACAG<br>GTTTTAGAGAATGGAGTTGAACATGAACTAGGAAGCCGGGCTCTGC<br>CCAAGATGAAAGCCAGGACTTCCCCACACCCACGTCCAAGGACAG<br>GCCGGTGTGAGGGGCTGCCCCACACAGCCTGGACGGGATG<br>TCTCCAAGCTCTTGTCTCCTCAGCATCTGACAGGCGTACACACT<br>GTCGTGTATGAATATTTTGTAGCAAAAGTTTACAGTAAGCTAGTC<br>TTCCCTCTGCTTTCTCCAAGCTTACTGAGCCCGGGCTGGGAGG<br>CCCGGCCAGGAACAGACTCTTCCACAGGCTTACGGCTTTTCCAGG<br>CACCTTGAAGCAT <b>CAGGGT</b> GGACAGTCAAGATTAGAGCGGGCCGGG<br>AAAAGCACGTCTCTCTGCTCAAGAAGGGCAGGTCTCTGAAACTG<br>CATTAAATCTTTATAGAAAATGTGAACACTGAATTTATTTTAAAAA<br>TAATAAAAACAAAACATTTTAAAAAAATCAAAAAAGAAAAATGG<br>AAAAAAAACCCACAGAAAACAACCTTAAAGTGTATATAGGTTTTGA<br>AGGGAGTGAATGAATGCGGTTTTCTTTCTTCTGCGGTTTTATTTT<br>TTTTCTTTTGGCTTGGCTGGTTGGTTTTGTGTAGAGAAGATTTGAG<br>ATGGTACTCTATTTCAATCAAAAGTGAAGTTTTGTAGTGGGACCAG<br>AAATTAAGCCACACCCCTCCCTAACCCCAATCTGTCTG                         |
| ENSMUST0000054168.1 | 1 | 107                             | ENSMUSG0000050441.1 | TGGCGCCGAGCCGTGTGCTCCTCCTCCGCGCCGCATATTGTC<br>TGTGTGAAGCTAGGGGAGCGCGCTATTGCCGCTGCCGCTTCCACC<br>GCAGTGTGAAGAAA <b>AGGGT</b> CTGAAACAAAGTCTTACCAACGCTG<br>CTTTTGAACACAGTACTGCTGGATCTTTAAACATCAAGTTACAGT<br>TTGTCTGTCAACCTGTCTGAC                                                                                                                                                                                                                                                                                                                                                                                                                                                                                                                                                                                                                                                                                                                                                                                                                                                                                                        |
| ENSMUST0000051517.1 | 1 | 17                              | ENSMUSG0000050490.1 | GGCGGTGTGGTTGATT <b>AGGGT</b> GTGCTTTCAATCGTGTGGCCTTTG<br>GGAACCCCGGTAGCCACTGCCGCTCCTTCTGTCTCTCGCC                                                                                                                                                                                                                                                                                                                                                                                                                                                                                                                                                                                                                                                                                                                                                                                                                                                                                                                                                                                                                                    |
| ENSMUST0000056704.1 | 1 | 181                             | ENSMUSG0000050560.1 | GGCGAGAGGAGGAGGAAAGCCGGAGCGGAGCGGGCGGCTGGGGGG<br>GGTGGACCCGCCGGGCTGCTGCTGCCACCGCCGCCCGCCACCA<br>CCGCTCGTGGGGCTCGTGGCGTGAAGGAGGACGAGTGAAGACCC<br>CGGGCGAGCGGGCGGGCGCCGCTGCTGCTGCTGCTGCGGG <b>AGG</b><br><b>GT</b> CGGCGGGCGGACGGCG                                                                                                                                                                                                                                                                                                                                                                                                                                                                                                                                                                                                                                                                                                                                                                                                                                                                                                     |
| ENSMUST0000060404.1 | 1 | 195                             | ENSMUSG0000050565.1 | GGAAATGAAACCGAGCGCAGAGTAGTTTGGGGCTCCGACAATGGCT<br>TAGCCGCCGACTCTAGCAAAAGCTTACAGAAAGAGGAGACCTAGA<br>CCCCCAAACTGAAGCTCCAGACTAGGCAGAGCTGCCCGCTCCG<br>CTCGGGTCACTTCGCACCACCCTTCCCGCGCGGCCACTGCGTCT<br>CTTCCCTCTT <b>AGGGT</b> CCGGGTGGACTCAATCCGGGAGTGCAGCC<br>CAAAGGGCCGCAGAAATCACAGGACCCAGGCGGGCCGGAGCGGG<br>GCCCGCTCCACGGGGCGCGCCTGCCCGCCGCTGCCCGCCCGC<br>GCGCGCTCCCGAGCCCGCAGCCGAGACTGTTACCTTCGCGGTCTC<br>ACTGGAGGACGGAGAGTCCCGTAACCCCTCGGCCGCTCGTGGCCGA                                                                                                                                                                                                                                                                                                                                                                                                                                                                                                                                                                                                                                                                              |

|                      |   |       |                      |                                                                                                                                                                                                                                                                                                                                                                                                                                                                                                                                                                                                                                                                                                                                                                                                                                                                                                                                                                                                                                                                                                                                                                                                                                                                                                                                                                                                                                                                                                                                                                                                                                                                                                                                                                                                                                                                                                               |
|----------------------|---|-------|----------------------|---------------------------------------------------------------------------------------------------------------------------------------------------------------------------------------------------------------------------------------------------------------------------------------------------------------------------------------------------------------------------------------------------------------------------------------------------------------------------------------------------------------------------------------------------------------------------------------------------------------------------------------------------------------------------------------------------------------------------------------------------------------------------------------------------------------------------------------------------------------------------------------------------------------------------------------------------------------------------------------------------------------------------------------------------------------------------------------------------------------------------------------------------------------------------------------------------------------------------------------------------------------------------------------------------------------------------------------------------------------------------------------------------------------------------------------------------------------------------------------------------------------------------------------------------------------------------------------------------------------------------------------------------------------------------------------------------------------------------------------------------------------------------------------------------------------------------------------------------------------------------------------------------------------|
| ENSMUST00000053254.1 | 1 | 1279  | ENSMUSG00000050620.1 | GACAGCTGCGGCTGCTGTGAGTGTCTCAAGGCGAGCAGACCTCC<br>GCGTCTTCATCTCCTCGGCTTCCTGGGCTCGCCGCTGCCTCCGTGG<br>TCGAGAGCGAAGGTTGTAAGCGCTTTCTCTCACTTCCTCTCCCGCA<br>GAAGCCGGCCGAACTTTTCTGGCGGGTTCGTCTCCCCCGGGAG<br>ACCTTTCTTTGGCCGCCGGGCTCGAAGTCGCCGTACACTTCTGC<br>CGGCTCCTCTGAAAACCTCACTTCCTCGTCCGCGGGCGACGGG<br>TGAGTCCGTACGCAGGTCTTTGAGAAAGGATCCCTCCCCACCC<br>ACCTCCCTACGGCACAAACAGAAATCGAGGTGTGTGACGCATPCC<br>CAGACCATCTGCAAACCTCAACACCAGCGACTTCTCTGTGACTGGG<br>TCCAGATAAAGGTCCTTTCAAGACTGACTTCAGTGGATCTACTCCA<br>CCAGGTCTTCCGACCTTACTACATCACTGCCAAGTGTATTGGCG<br>AGACTGCCTGCACCAGCAGAAGACTCACCGGATCCATCAGAGGCTC<br>GGTTTACCAGAGCAAAGCAAGAGCCTGTGTGGTTCTGCCTCCCGC<br>CAGGATGGGTTTGATCCGTCAAGCAAGGAATGAGGAAGAAAACAT<br>ATACTCGGTCGCCACGACAGCACCAGGGCAAGATCATTTACCATT<br>CGAACATCAACAAAGCCAGTCCAATGGCAGTGGTAATGGTTCTG<br>ACAGTGAGATGGACACAAGTTCCCTAGAGCGAGGCCGCAAGGTATC<br>TGCAGTGAGTAAGCCTGTGTGTACAGGACAAGATGCACTCGCCTG<br>GGGCGGTTTGTAGTTACCGTACCAGCTTCAGTGTCCGGAGTGATG<br>ATGAGCTGGGACCCATCCGAAAGAAAGAGGAGGACCAGGCATCCCA<br>AGGTTATAAAGGGGACAAATGCTGTCAATCCATATGAAACAGATGAG<br>GACCCAGGAGGAGGAATATCCTTCGAAGTCTAAGAAGGAACACCA<br>AGAAACCAAGCCCAACCCCGCCATCCATCACAAGGCAACCTG<br>GGAGAGTAACTATTTGGGGTGCCCTTAACAACAGTGGTGACTCCA<br>GAGAAACCGATACCCATTTTCAATGAAAGATGCATTTGAGTACATCG<br>AAGCCACAGGACTAAGCACTGAAGGCATCTACCGGTCAGTGGAAA<br>CAAGTCAGAAATGGAAAGTTTGCAGGACAGTTTGTATCAAGACCAC<br>AATCTGGACTGGCAGAGAAAGACTTCACTGTGAACACTGTGGCAG<br>GGCCATGAAGAGTTTCTCAGAGCTACCAGACCCCTGGTACC<br>ATACAGCATGCAGATTGACTTGGTGAAGCTCACAAAATCAACGAC<br>AGGGAACAGAAAGCTGCATGCTCTGAAGGAGTGTGAAGAAAGTTCC<br>CGAAGGAAAACCATGAAGTCTTCAAATATGTCACTCCCACCTGAA<br>CAAAGTCAGCCACAACAACAAGGTGAATCTTATGACCAGTGAAGAC<br>CTGTCCATCTGCTTCTGGCCACGCTGATGCGGCTGACTTCAGCA<br>GCATGGACGCGCTCACAGCCACGCGCTCCTACCAGACCATCATCGA<br>CATTAGCAGAGACATGTTTCTGAGACAGCCGACTATGTGACACTCT<br>GATTTACAGCCCTGACTTCCCCACCTGTGGAACGTGT <b>AGGGT</b> TAT<br>TTGCCTAAGATGCGACC |
| ENSMUST00000051412.1 | 1 | 85    | ENSMUSG00000050904.1 | CGGACGTCCGCACGTGGTTGCCGGTTT <b>AGGGT</b> GCTGCTGTAGTGGC<br>GATACGTCCCGCGCTGTCCCGAAGTGAGGGATCCGAGCCGACGG<br>AGAGCC                                                                                                                                                                                                                                                                                                                                                                                                                                                                                                                                                                                                                                                                                                                                                                                                                                                                                                                                                                                                                                                                                                                                                                                                                                                                                                                                                                                                                                                                                                                                                                                                                                                                                                                                                                                             |
| ENSMUST00000053256.1 | 1 | 27    | ENSMUSG00000051141.1 | CGAGGTAGCAGGGAAGGGTTTCGC <b>AGGGT</b> GCTTGCGTGGTGTGTG<br>AGCAG <b>AGGGT</b> CGGCGTTAGGGGCCTTAGTTCTGTATACA                                                                                                                                                                                                                                                                                                                                                                                                                                                                                                                                                                                                                                                                                                                                                                                                                                                                                                                                                                                                                                                                                                                                                                                                                                                                                                                                                                                                                                                                                                                                                                                                                                                                                                                                                                                                    |
| ENSMUST00000051112.1 | 2 | 24,51 | ENSMUSG00000051256.1 | GTGAAAGCCGGCCGAGGTAGCAGGGAAGGGTTTCGC <b>AGGGT</b> GCTT<br>GGCTGGGTGTGTGAGCAG <b>AGGGT</b> CGGCGTTAGGGGCCTTAGTTCTG<br>TACA                                                                                                                                                                                                                                                                                                                                                                                                                                                                                                                                                                                                                                                                                                                                                                                                                                                                                                                                                                                                                                                                                                                                                                                                                                                                                                                                                                                                                                                                                                                                                                                                                                                                                                                                                                                     |
| ENSMUST00000062200.1 | 2 | 37,64 | ENSMUSG00000051256.1 | GGTCCGGCCCCGGCCAGCACCCGCGCTGGGCTCAAAGTTTGGC<br>GCCGCCCTGCGCCGCGCCCGATGTATGGGTGATCTACTGCGGC<br>GGCGCGCGCGCGCGCGCGCGCGGC <b>AGGGT</b> GAGGGACGGCCATA<br>GTTGCGCGCGCGCGCGCGCGCGGACACAACAAAAGTGCAGCGGCT<br>CCCCGCGCGCGCTCGGACGGCTGCGGGGACGTGGGGCCCGCCGGCC<br>CGGGCTCGGCTCGGCTCGCCGCGCGCTCGCGGCTTGGCCCGG<br>CTCTGCCCGCGCGCCCGCGCGCGGGATGTCTGTAAGCCG                                                                                                                                                                                                                                                                                                                                                                                                                                                                                                                                                                                                                                                                                                                                                                                                                                                                                                                                                                                                                                                                                                                                                                                                                                                                                                                                                                                                                                                                                                                                                                |
| ENSMUST00000049640.1 | 1 | 120   | ENSMUSG00000051303.1 | TCTC <b>AGGGT</b> CCTGACCTATGCTCTGTGTCTTGACAGTGCCTGCTC<br>ACTGTGTCCCCGGGTT                                                                                                                                                                                                                                                                                                                                                                                                                                                                                                                                                                                                                                                                                                                                                                                                                                                                                                                                                                                                                                                                                                                                                                                                                                                                                                                                                                                                                                                                                                                                                                                                                                                                                                                                                                                                                                    |
| ENSMUST00000058162.1 | 1 | 5     | ENSMUSG00000051510.1 | GGGAGGCTGCCAG <b>AGGGT</b> TTGTCACTGCTGTGTGCTCCTCCGCCTCA<br>GCGAGTCCAGCCCGGCCCTAGTGGTGCCTGCCTTTCTCATAGCC<br>GTTACCCTCAGCCGCCACAGCCCGGACCGGGAGAGGCGCGCCG                                                                                                                                                                                                                                                                                                                                                                                                                                                                                                                                                                                                                                                                                                                                                                                                                                                                                                                                                                                                                                                                                                                                                                                                                                                                                                                                                                                                                                                                                                                                                                                                                                                                                                                                                       |
| ENSMUST00000053054.1 | 1 | 13    | ENSMUSG00000051612.1 |                                                                                                                                                                                                                                                                                                                                                                                                                                                                                                                                                                                                                                                                                                                                                                                                                                                                                                                                                                                                                                                                                                                                                                                                                                                                                                                                                                                                                                                                                                                                                                                                                                                                                                                                                                                                                                                                                                               |

Genes with an annotated 5'-UTR in the ENSEMBL database and expressed at late-gastrulation stage according to our U74Av2 Affymetrix wild-type data set were searched for high-affinity Grsf1-binding sites (5'-AGGGU-3'). Genes with binding sites are listed with their ENSEMBL transcript ID, total number of matches, locations of the matches, ENSEMBL gene ID and the 5'-UTR sequence.
