# Supplementary material for: Dissecting Wnt/β-catenin signaling during gastrulation using RNA interference in mouse embryos
Source: Oxford University Press journal article supplement (doi:10.1242/dev.01842), 2005-04-28
Supplement: dev01842supptable4.pdf [file dev01842supptable4.pdf]

**Table S4. Bioinformatic prediction for Grsf1 and  $\beta$ -catenin co-regulated genes (intersection of Tables S1 and S3)**

| Probe Set ID | Gene symbol                                 | wt-mut | het-mut | Total matches | Locations | Gene ID              | Sequence                                                                                                                                                                                                                                                                                                                                                                                                                                                                                                                                                                                                                                                                                                                                                   |
|--------------|---------------------------------------------|--------|---------|---------------|-----------|----------------------|------------------------------------------------------------------------------------------------------------------------------------------------------------------------------------------------------------------------------------------------------------------------------------------------------------------------------------------------------------------------------------------------------------------------------------------------------------------------------------------------------------------------------------------------------------------------------------------------------------------------------------------------------------------------------------------------------------------------------------------------------------|
| 99561_f_at   | Cldn7                                       | 0.6    | 0.7     | 1             | 383       | ENSMUSG00000018569.1 | GCCCGCACCTGCCGCGCCACCCGCCAGCTCCCTGTG<br>CCGCGCACCCGACGCTGGGGCCCAAGGGCCCGCAT<br>ACTTTCCTGGGGGCCACGCCCTAACGGCCCTCCAC<br>TTCTTTGGGTAGTCTCGGAGCACGCCGTAGGAAC<br>CGCCCGGCTTCGGGGACCGCTTTTGTCTGGAACC<br>AGTCCTTCGGGGCAAGCCGGTTCCTCTGTGTGA<br>GAGTGTGCTTCACCGAGGGGACGATTTGTGT<br>ACCTCGGTAAACAAGATTTGTAGTTACCCGGTCCA<br>AAAAAAATCTTTTCTCCTTTGGGTGACTTAAAT<br>CTCTATCCAAATTTTCTGTGTGTGCTGCCCGG<br>ATTTTGTTTTGTGTGTGTGTGTGTGTGTGTGTGT<br>GTCGCCCTCCCGCGCTCCCGTCTTTTCTGAGAC<br>AAGGAA                                                                                                                                                                                                                                                                                |
| 94036_at     | Cdc42ep4                                    | -0.6   | -1      | 1             | 286       | ENSMUSG00000041598.1 | AACAATCGGCGCGGTGCCCCGAGGGGGCGTGT<br>GCGCACAGACTTCTCCATGAATAACCGCTGAGTTC<br>GTCGGTAGTGGTAGAGGGGTGACCGTGTCTCC<br>CGTGTACACACTGCTTTAGGCGCCACCCGGTGT<br>CGCCCGCGGGGAGAAAGGAGGGCAAGAGCCGGC<br>TGGAAGGCAATAGCCTAAAGAGCAAATACTCCCG<br>CCCGTCCGAGCCCTTCTTCTCCCGCCCGCCGC<br>CTCCCTTGAAGACTTGGAGGCAAGGCCGCAAGA<br>GGCGAGGGTGGGGCTGGGCCGAGCTGGCGTCCC<br>TTAGAACTTGGACGAGGCTTTACGCGGGGGGAC<br>CTGCGCGCGCCCGGTACGTCGGAAGCATGGGC<br>TCGAGGCTTTTTCAGGGCGAGTAGGTAGCGTGTG<br>GTTAATGATTTAACCCTGGCTTGGGACGTTGAAG<br>GCTGCGATCCTGATCTCTGGCTCCTCCCATTCCT<br>GGAGCGCCCCAGCCGAGGAACAAATCTGCCCTC<br>CTGTGCTGTGGCGTCTGTGCTGGAGCTGCCTTT<br>CCCTTTGGGGGACCCCTGGTGTGTGTGGCCCTC<br>GATTGCCCTGTCTACCTTTGCATTGTGGACTTC<br>AGATCTGACCCATACTGCTGTGTGTGTGGGAG<br>TGCCAGCTCCCCCGACCCAGCAGCAG |
| 94449_at     | protocadherin<br>gamma<br>subfamily<br>B, 1 | -0.5   | -0.6    | 2             | 47,62     | ENSMUSG00000024463.1 | CCTGTCAGATCACCATCCCATATCGTCAAGTGCAT<br>TCTACTGTCAAAGGGTACAGTGGCTGAGGGTCTGT<br>GCCCTGCTCCACGGCAGCCCCGAATGGTGCAC<br>CATGGCACCCTGATATCTTAGGTTCCTGGGTCCAC<br>CCACAATGCTGCTACTCGTGAACCTCAGTGTGAGT<br>CATTTGGCAAGTCTGGGTCTTCTTCTCCCGAGAG<br>TAATCACACAGAGCGCTCACACTCTCTCCTCTGG<br>GAGCCTGTGTGAGAATTAATTACCAGCACATCCC<br>GAACTGGTGAAGTCTGGCTGTAGGAGAATGTGT<br>GGTGGGATACATCTCCTGGAAGGGACCTGCGGAG<br>TTAGAAATTAAGCGTGGCTGGCGAGCCCTGCACA<br>TTGAGCTGGTTGGGAGAGGGCTACGGATCAGTTGG<br>CTCTGTCTGGAGCCTGTAGAAT                                                                                                                                                                                                                                                           |
| 164467_f_at  | Gjb3                                        | 1.8    | 0.8     | 1             | 20        | ENSMUSG00000042367.1 | GAGATGCCTCCTTAATGAGTAGGGTAGAAAGGAA<br>AGCATTCAGGGCGGGAGGAATCAAGGCCAGGTCTG<br>AGCAGAGAGAGGCAAGGTGGGCACAGCCCCCGAA<br>CCCTGAGCAGGCACC                                                                                                                                                                                                                                                                                                                                                                                                                                                                                                                                                                                                                         |
| 97013_f_at   | Cyba                                        | 0.5    | 0.5     | 1             | 48        | ENSMUSG00000006519.1 | GACTTGCGAAGTGGGCTGCAGAGTTGGACCGGGCT<br>GCTGCGTGTGCGCAGGGTCCCTCGTC                                                                                                                                                                                                                                                                                                                                                                                                                                                                                                                                                                                                                                                                                          |
| 93941_at     | T                                           | -1.4   | -1.4    | 1             | 95        | ENSMUSG00000023865.1 | GGCTCCGCAGAGTGACCCTTTTCTTGGAAAAGCG<br>GTGGCGAGAGAAGTGAAGGTGGCTGTTGGGTAGGG<br>AGTCAAGACTCCTGGAAGGTGGAGAGGGTGGCGGG<br>AGG                                                                                                                                                                                                                                                                                                                                                                                                                                                                                                                                                                                                                                    |
| 100009_r_at  | Sox2                                        | 1.3    | 1.3     | 1             | 318       | ENSMUSG00000047245.1 | GTGTTTGCAAAAAGGAAAAGTACTTTGTGCTC<br>TTAAGACTAGGGCTGGGAGAAAGAAGAGGAGAGA<br>GAAAGAAAGGAGAGAAAGTTGGAGCCCGAGGCTTA<br>AGCCTTTCCAAAACTAATCACAACAATCGCGGCG<br>GCCCGAGGAGAGAGCGCTGTTTTTCATCCCAA<br>TTGCATTCGCCCGTCTCGAGCTCCGCTTCCCCC<br>AACTATTCTCCGCCAGATCTCCGCGCAGGGCCGTG<br>CACGCCGAGGCCCGCCCGGCCCTGCATCCC<br>GGCCCCGAGCGCGGCCCCACAGTCCCGGCCGGG<br>CCGAGGGTTGGCGGCGCCGCGGGCCGCGCCCGC                                                                                                                                                                                                                                                                                                                                                                            |

|            |        |      |      |   |         |                      |                                                                                                                                                                                                                                                                                                                                                                                                                                                                                                                                                                                                                                                                                                                                                                                                                                                                                                          |
|------------|--------|------|------|---|---------|----------------------|----------------------------------------------------------------------------------------------------------------------------------------------------------------------------------------------------------------------------------------------------------------------------------------------------------------------------------------------------------------------------------------------------------------------------------------------------------------------------------------------------------------------------------------------------------------------------------------------------------------------------------------------------------------------------------------------------------------------------------------------------------------------------------------------------------------------------------------------------------------------------------------------------------|
| 100479_at  | Dnmt3a | 0.7  | 0.8  | 1 | 62      | ENSMUSG00000020661.1 | <p>CCAGCGCCCGC</p> <p>CCACAGGCAGAGCCGCCTGAAGCCCAGCGCTGAGG<br/>CTGCACCTTTCCGAGGGCTTGACATCAGGGTCTAT<br/>GTTTAAGTCTTAGCTCTTGCTTACAAAGACCACGG<br/>CAATTCCCTCTCTGAAGCCCTCGCAGCCCCACAGC<br/>GCCCTCGCAGCCCCAGCCTGCCGCCTACTGCCAG<br/>CA</p>                                                                                                                                                                                                                                                                                                                                                                                                                                                                                                                                                                                                                                                                      |
| 104672_at  | Frzb   | -1.1 | -1   | 2 | 10,105  | ENSMUSG00000027004.1 | <p>GTGGGGACCAAGGGTTCGTCTATGGATCCAGAGCC<br/>GGGGTGGAGTGGGAAAGGTGTGCGGCTCCTGTG<br/>GGGAGCTGCCTGGGGCTACAGCATCACAGATAGAC<br/>AGGGTCTCACACTCCAGTCCCCGAAAACCTCAAAG<br/>CCTTCTCGGAAGGAGGAGCCGGAGGGCAGGGGACC<br/>GCCGGGCGGAGCTCTTGTCGGCCGAGGTGGGAAGG<br/>CGCAGCTGCGAGCCAAGGCGCTGACCTCCTCTGAG<br/>CTCCTCTGGCCGCTCGCAGGATCTCCCGACCCTG<br/>CAGGACTTGGCAAACCTCCACCTCCCGTCCCATA<br/>GTCTCCACCCCCACAAATCTCCTCCTCGGAG<br/>GTCCCTATCCATCTCACTTTGCAGAATTTATCGC<br/>TTCTTCCAACACCTTTTGGCAACCCCCAGAATC<br/>CGAGTCCCTAACTGAATTTGACTTTTGTTTTAT<br/>TTCTCTCTGGCTTCCTCTCTGCCCTCATCTGA<br/>TTGATGTGCTAAGGCTGATGTCTCTGCCAGAGCGA<br/>GAGGAATAAATAGATGCTGCCCTAGAGGCTT<br/>AGACGCTTGGGAAGAGCAGCCGGCCGAGCAGGCA<br/>CCGGGCTCCGCCAAGCTAGTGGACCGACCTGGGA<br/>GCACTTGGATCCAAGAGAATGTGATTTGCCAGG<br/>GGTGGGGCAGCTCCCCAGGTCGTGGGATCACCC<br/>CTCGGAACCGCAGGGGGAGACTTCGGAACGAAAGT<br/>GTCTCCCGCTCCGTCGCTCGGCTGCGCCCTGCC<br/>CATCTGTGGGACC</p> |
| 93543_f_at | Gstm1  | 0.7  | 0.7  | 2 | 14,72   | ENSMUSG00000004038.1 | <p>CTGCCTTCCGCTTTAGGGTCTGCTGCTCTGGTTAC<br/>AGACCTAGGAAGGGAGTGCCTAATTGGGATTGGT<br/>GCAGGGTGGGAGGGACCCGCTGTTTTGTCTCTGCC<br/>CACGTTTTCTTAGTAGTCTGTATAAAGTCACAACT<br/>CCAAACACACAGGTCAGTCTGCTGAAGCCAGTTT<br/>GAGAAGACCACAGCACCAGCACC</p>                                                                                                                                                                                                                                                                                                                                                                                                                                                                                                                                                                                                                                                                     |
| 93888_at   | Hoxb1  | -1.7 | -1.8 | 1 | 31      | ENSMUSG00000018973.1 | <p>TGACATACTGCCGAAAGGTTGTAGGGCAAGAGGGT<br/>GTCTCCCCAAACGGCCCGACCCTCCTTCGGCCCTC<br/>TAC</p>                                                                                                                                                                                                                                                                                                                                                                                                                                                                                                                                                                                                                                                                                                                                                                                                               |
| 98419_at   | Meox1  | -1   | -0.7 | 1 | 14      | ENSMUSG00000001493.1 | <p>CACTCATCACTCAGGGTCCCCGGGAAGGGCTTGT<br/>CAGTATGGGTGGGTCCAAGGTAGGACAGTCAAAT<br/>GTTTCAGCATGGTAGGAACAACCTCCGTGCCCGATA<br/>GTCAGCGTGTGTCGGGGCAGGAAGGCAGACGTGA<br/>AGCCTAGACAGGTGTGGACACGCACATGTGTGTTC<br/>CTGGCCACGTGTTGTGGAATTTGAGGCAAAATTT<br/>TTGTTTTGGTTCCTGGGGTAAAGTTTCCATTCAAC<br/>AATTTCCCTACTGTTAATTTTCTTTAATTTT<br/>AAATTACAAAACCTGACTAGAAAAAGCGCAATAC<br/>CTTTGAAAGGACTGGGGCAGGCAGTGGACAGCAG</p>                                                                                                                                                                                                                                                                                                                                                                                                                                                                                                |
| 93953_at   | Prss12 | 0.7  | 0.6  | 1 | 2       | ENSMUSG00000027978.1 | <p>CGAGGGTGGGGTGGAGTCCGGACTCCGGGCTACAG<br/>AGCTCCTGGCGCTCATCGCCTCTGGCGCTCCAGCC<br/>TTTGTCTCGCGGGCTGACCCTTTGGGTCCCGGTG<br/>TGA</p>                                                                                                                                                                                                                                                                                                                                                                                                                                                                                                                                                                                                                                                                                                                                                                        |
| 98427_s_at | Nfkb1  | -1.3 | -1.1 | 2 | 206,229 | ENSMUSG00000028163.1 | <p>CGCGGGCCGGTTCCTAGCAGCGCAGGCCGGAGCTCA<br/>GGCCCCCGCCGCGCCCGCCCGCCCGCGCTTCTC<br/>CGCCCGCGCCGAGCCATGGCGCGCCGCTGAGCCG<br/>CCGCCCCCGCCCGCCGCGCCCGACCCGGCTCGGG<br/>CTCCCGCCGGTCCGCGCCGCTCCGCAGCGGGAGCC<br/>CGCAGGCAGGAGAGGCGCGCCGATCTCCAGGG<br/>TACCCTCAGAGGCCAGAAGAGGGTGTCTCAGAGCCCT<br/>GTAACTGGAGTTTGACGGTCTGAGCTGCGCATC<br/>TTCACC</p>                                                                                                                                                                                                                                                                                                                                                                                                                                                                                                                                                                  |
| 103818_at  | Slc7a7 | 0.6  | 0.6  | 2 | 43,187  | ENSMUSG00000000958.1 | <p>AGCAAATCAGCAAAAAGAGGATCTAGCGAATCAGT<br/>TGGTTTCAGGGTTGGTTCTCATACAGGCATCTCA<br/>GCGCAGGGACATTTGAAACTGAAATCAGAGGGGAG<br/>AGACTTTGGGGGTCAGGGGGAGGCAGAAAAAGTT<br/>TTACCAAACCTGCCTCATTCATGCCTGTCTGTGTC<br/>ATAACAGGTTGAGGGTTCAGCTGTCTGATAAATAA<br/>GAGGGCAATGCGAGCAAGCTGGTGAAGGTCTTCTT<br/>TCTTTCGCC</p>                                                                                                                                                                                                                                                                                                                                                                                                                                                                                                                                                                                                   |

|            |       |      |      |   |          |                      |                                                                                                                                                                                                                                                                                                                                                                                                                                                                                                                                                                                                                                                                                                                                                                                                                                                                                                                                                                                                                                                                                                                                                                                                                            |
|------------|-------|------|------|---|----------|----------------------|----------------------------------------------------------------------------------------------------------------------------------------------------------------------------------------------------------------------------------------------------------------------------------------------------------------------------------------------------------------------------------------------------------------------------------------------------------------------------------------------------------------------------------------------------------------------------------------------------------------------------------------------------------------------------------------------------------------------------------------------------------------------------------------------------------------------------------------------------------------------------------------------------------------------------------------------------------------------------------------------------------------------------------------------------------------------------------------------------------------------------------------------------------------------------------------------------------------------------|
| 92997_g_at | Sox17 | -0.8 | -0.7 | 2 | 733,1020 | ENSMUSG00000025902.1 | <p>CCCATTTAGTGAAGAACTGAAATATGGCCCACTC<br/> ACACTGCTGGCGGGTCTGAAGTGCGGTTGGCCCA<br/> ACACTCCTCCCAAAGTATCTATCAAGAGAATGGTC<br/> AGCAGAAGTTAGATCTAGTTTTTTAGAGAAATCAAC<br/> CAAGACAGGGAAGACAGAGAAAATGCATTCTGGAC<br/> CCGCTACTGTTTTCAATCGTCAATTCAAACAAAAC<br/> CCGTAGTTTTATTTAAAAAAAAAAAAACCGGAAA<br/> GAGAAAATTAGGCCCTGAGATCTTTGAAAAGATGC<br/> CCATTACTAGATACAAAAGAGAAGAGTCACTGTGG<br/> AGGTGAGGGACTGCGTCCCTGCTTCTGAGAGGCAG<br/> GAGAGCTACATGGGGAGACTGTCTCAAACTAACA<br/> ACAGAAGAGATAGAATTTTTTTTTCTTAAAGAGC<br/> ACCTGGCTAGAGAATCGATTTGTAAAAATTGCTATT<br/> TCTACCCCTAGAGTTTTCCCTTGATTAACATCTGAA<br/> ATGCATTTTTTTGTTTTACTTTCAAGCTAATGTT<br/> TTTCAGAAAAAATAAAAAGCTTTGAGGAAAAGCA<br/> CATTATCAGTTAGATTTAAGACCAATTGCTTTTAA<br/> ATTACCAATTTAAAATAATCATTTTTTTTATTCTTT<br/> AAAGCAGATTTAATTTTACCCCTTTGTATGAATC<br/> TTACAGACCTGGAGTTTTAACTACTATCACTGATC<br/> TCTACACACAACCTCCAGCTTTAAATGGGAGGGAG<br/> GGTCACCACTGCTTTATAACATAACAAATTAGAGA<br/> AAAGCTGGCTTCTGTATGAGTTCTTTGGAGACAAA<br/> GTAGCTCCAGAACTGCAGACCAGAAGCTATCAAAA<br/> ATCTCTGTGCTTTTTTGGAACTCCAGTAAGCCAG<br/> ATTTGGTCTCTGAAATAATACAGGAAAACCTCAGC<br/> ATGTCACCTCATGGATACAATGAGCAGCACCTCCA<br/> GACATCTGAATTCAGCCTTCTATTTCCCAAGA<br/> GGTCTTGGCGCCAGCGCCGGCTCCAGCCAGi</p> |
| 96771_at   | ErbB3 | 1    | 0.8  | 1 | 57       | ENSMUSG00000018166.1 | <p>GCACCGTGAGACTGGGACCACAGCTGCTGCTCA<br/> ACTGGGGAGTACAAATTGCCAAGGGTATGTATTAC<br/> CTCGAGGAACACAGCATGGTG</p>                                                                                                                                                                                                                                                                                                                                                                                                                                                                                                                                                                                                                                                                                                                                                                                                                                                                                                                                                                                                                                                                                                               |

Highlighted are those transcripts that showed a significant  $\beta$ -catenin-dependent deregulation and contained a *Grsf1* consensus-binding site in the 5' UTR.
